# Supplementary material for: Draft Sequences of the Radish (Raphanus sativus L.) Genome
Source: PubMed Central journal article supplement (PMC4195494; doi:10.1093/dnares/dsu014), 2014-05-16
Supplement: supp_dsu014_dsu014supp_tables8.pdf [file supp_dsu014_dsu014supp_tables8.pdf]

Table S8 Comparison of repetitive sequences in three Brassicaceae species

|                     |                |                |              | <i>R. sativus</i><br>(RSA_r1.0) |                           | <i>B. rapa</i><br>(v 1.2) |                           | <i>A. thaliana</i><br>(TAIR10) |                           |
|---------------------|----------------|----------------|--------------|---------------------------------|---------------------------|---------------------------|---------------------------|--------------------------------|---------------------------|
|                     |                |                |              | Length<br>occupied (bp)         | Percentage of<br>sequence | Length<br>occupied (bp)   | Percentage of<br>sequence | Length<br>occupied (bp)        | Percentage of<br>sequence |
|                     |                | SINEs:         | Total        | 830,222                         | 0.2                       | 657,234                   | 0.2                       | 126,746                        | 0.1                       |
|                     |                | LINEs:         | Total        | 6,002,395                       | 1.5                       | 5,368,571                 | 1.9                       | 1,359,015                      | 1.4                       |
|                     |                | Class I        | Total        | 16,418,718                      | 4.1                       | 12,490,461                | 4.4                       | 8,165,644                      | 8.7                       |
| Interspread repeats | LTR elements   |                | Copia        | 8,186,444                       | 2.0                       | 7,173,353                 | 2.5                       | 1,826,674                      | 1.9                       |
|                     |                |                | Gypsy        | 7,679,430                       | 1.9                       | 4,854,533                 | 1.7                       | 6,243,686                      | 6.6                       |
| Known repeats       | Class II       | DNA elements   |              | 8,044,795                       | 2.0                       | 7,309,301                 | 2.6                       | 5,392,948                      | 5.7                       |
|                     |                |                | Unclassified | 1,820                           | 0.0                       | 2,360                     | 0.0                       | 0                              | 0.0                       |
|                     |                | Helitrons      |              | 1,058,771                       | 0.3                       | 671,961                   | 0.2                       | 2,205,279                      | 2.3                       |
|                     |                | Low complexity |              | 15,206,887                      | 3.8                       | 12,241,121                | 4.3                       | 1,434,843                      | 1.5                       |
|                     |                | Unknown        |              | 15,488                          | 0.0                       | 13,217                    | 0.0                       | 5,676                          | 0.0                       |
|                     |                | Subtotal       |              | 48,164,975                      | 12.0                      | 39,231,687                | 13.8                      | 18,791,499                     | 20.0                      |
|                     |                | Unknown        |              | 59,040,800                      | 14.7                      | 54,198,683                | 19.1                      | 4,832,479                      | 5.1                       |
| Unique repeats      | Low complexity |                |              | 525                             | 0.0                       | 803                       | 0.0                       | 43                             | 0.0                       |
|                     |                |                | Subtotal     | 59,041,325                      | 14.7                      | 54,199,486                | 19.1                      | 4,832,522                      | 5.1                       |
|                     |                | Total          |              | 107,206,300                     | 26.6                      | 93,431,173                | 32.9                      | 23,624,021                     | 25.1                      |

Table S9 Classification of predicted gene into eukaryotic Clusters of Orthologous Groups of proteins (KOG)

| KOG ID | Name                               | <i>R. sativus</i> (RSA_r1.0) |       | <i>B. rapa</i> (v 1.2) |       | <i>B. oleracea</i> (unigene) |       | <i>R. raphanistrum</i> (unigene) |       | <i>A. thaliana</i> (TAIR10) |       | KOG                                                              |
|--------|------------------------------------|------------------------------|-------|------------------------|-------|------------------------------|-------|----------------------------------|-------|-----------------------------|-------|------------------------------------------------------------------|
|        |                                    | Number of KOGs               | %     | Number of KOGs         | %     | Number of KOGs               | %     | Number of KOGs                   | %     | Number of KOGs              | %     |                                                                  |
| J      | Information storage and processing | 1,343                        | 2.64  | 1,140                  | 2.82  | 1,056                        | 3.57  | 1,045                            | 5.27  | 977                         | 2.72  | J: Translation, ribosomal structure and biogenesis               |
| A      |                                    | 950                          | 1.87  | 815                    | 2.02  | 799                          | 2.70  | 396                              | 2.00  | 798                         | 2.22  | A: RNA processing and modification                               |
| K      |                                    | 1,896                        | 3.73  | 1,645                  | 4.08  | 1,082                        | 3.65  | 697                              | 3.51  | 1,391                       | 3.88  | K: Transcription                                                 |
| L      |                                    | 855                          | 1.68  | 463                    | 1.15  | 450                          | 1.52  | 192                              | 0.97  | 462                         | 1.29  | L: Replication, recombination and repair                         |
| B      |                                    | 345                          | 0.68  | 286                    | 0.71  | 257                          | 0.87  | 155                              | 0.78  | 294                         | 0.82  | B: Chromatin structure and dynamics                              |
| D      |                                    | 1,075                        | 2.11  | 698                    | 1.73  | 509                          | 1.72  | 261                              | 1.32  | 547                         | 1.52  | D: Cell cycle control, cell division, chromosome partitioning    |
| Y      | Cellular processes and signaling   | 108                          | 0.21  | 81                     | 0.20  | 88                           | 0.30  | 41                               | 0.21  | 63                          | 0.18  | Y: Nuclear structure                                             |
| V      |                                    | 227                          | 0.45  | 190                    | 0.47  | 135                          | 0.46  | 93                               | 0.47  | 177                         | 0.49  | V: Defense mechanisms                                            |
| T      |                                    | 2,645                        | 5.20  | 2,197                  | 5.44  | 1,778                        | 6.00  | 950                              | 4.79  | 1,864                       | 5.19  | T: Signal transduction mechanisms                                |
| M      |                                    | 338                          | 0.66  | 296                    | 0.73  | 259                          | 0.87  | 161                              | 0.81  | 242                         | 0.67  | M: Cell wall/membrane/envelope biogenesis                        |
| Z      |                                    | 649                          | 1.28  | 474                    | 1.17  | 402                          | 1.36  | 274                              | 1.38  | 407                         | 1.13  | Z: Cytoskeleton                                                  |
| W      |                                    | 83                           | 0.16  | 83                     | 0.21  | 54                           | 0.18  | 20                               | 0.10  | 59                          | 0.16  | W: Extracellular structures                                      |
| U      |                                    | 1,364                        | 2.68  | 1,174                  | 2.91  | 1,059                        | 3.58  | 761                              | 3.84  | 970                         | 2.70  | U: Intracellular trafficking, secretion, and vesicular transport |
| O      |                                    | 2,974                        | 5.85  | 2,601                  | 6.44  | 2,173                        | 7.34  | 1,594                            | 8.03  | 2,300                       | 6.41  | O: Posttranslational modification, protein turnover, chaperones  |
| C      |                                    | 978                          | 1.92  | 842                    | 2.09  | 810                          | 2.73  | 665                              | 3.35  | 720                         | 2.01  | C: Energy production and conversion                              |
| G      |                                    | 1,482                        | 2.91  | 1,235                  | 3.06  | 1,117                        | 3.77  | 669                              | 3.37  | 1,076                       | 3.00  | G: Carbohydrate transport and metabolism                         |
| E      | Metabolism                         | 1,097                        | 2.16  | 885                    | 2.19  | 873                          | 2.95  | 531                              | 2.68  | 787                         | 2.19  | E: Amino acid transport and metabolism                           |
| F      |                                    | 272                          | 0.53  | 224                    | 0.56  | 206                          | 0.70  | 126                              | 0.64  | 208                         | 0.58  | F: Nucleotide transport and metabolism                           |
| H      |                                    | 223                          | 0.44  | 180                    | 0.45  | 198                          | 0.67  | 130                              | 0.66  | 197                         | 0.55  | H: Coenzyme transport and metabolism                             |
| I      |                                    | 987                          | 1.94  | 880                    | 2.18  | 764                          | 2.58  | 492                              | 2.48  | 781                         | 2.18  | I: Lipid transport and metabolism                                |
| P      |                                    | 839                          | 1.65  | 704                    | 1.74  | 509                          | 1.72  | 349                              | 1.76  | 592                         | 1.65  | P: Inorganic ion transport and metabolism                        |
| Q      |                                    | 1,098                        | 2.16  | 974                    | 2.41  | 593                          | 2.00  | 368                              | 1.85  | 775                         | 2.16  | Q: Secondary metabolites biosynthesis, transport and catabolism  |
| R      | Poorly characterized               | 6,667                        | 13.11 | 4,327                  | 10.72 | 3,309                        | 11.17 | 1,985                            | 10.00 | 3,730                       | 10.39 | R: General function prediction only                              |
| S      |                                    | 1,304                        | 2.56  | 1,127                  | 2.79  | 949                          | 3.20  | 637                              | 3.21  | 1,090                       | 3.04  | S: Function unknown                                              |
| -      |                                    | 21,040                       | 41.38 | 16,830                 | 41.70 | 10,184                       | 34.38 | 7,247                            | 36.52 | 15,380                      | 42.85 | No hits                                                          |

Table S10 Numbers of SNPs between sequences of RSA\_r1.0 and reads of Sayatori

|                                                                                             |             |
|---------------------------------------------------------------------------------------------|-------------|
| Total size of RSA_r1.0 (bp)                                                                 | 402,330,269 |
| Total size of regions mapped by reads of Sayatori with the read depth of 3 to 18 times (bp) | 151,012,313 |
| Number of SNPs                                                                              | 1,137,732   |
| <hr/>                                                                                       |             |
| Total size of genic region of RSA_r1.0 (bp)                                                 | 121,807,005 |
| Total size of regions mapped by reads of Sayatori with the read depth of 3 to 18 times (bp) | 77,327,761  |
| Number of SNPs                                                                              | 500,113     |
| <hr/>                                                                                       |             |
| Total size of non-genic region of RSA_r1.0 (bp)                                             | 280,523,264 |
| Total size of regions mapped by reads of Sayatori with the read depth of 3 to 18 times (bp) | 73,684,552  |
| Number of SNPs                                                                              | 637,619     |

Table S11 List of SNP DNA markers

| Marker name | Primer sequence (5'-3') |                         | Probe sequence     | Hybridization condition |     | Probe sequence     | Hybridization condition |     |
|-------------|-------------------------|-------------------------|--------------------|-------------------------|-----|--------------------|-------------------------|-----|
|             | Forward                 | Reverse                 | Sayatori           | Temperature             | SSC | Aokubi             | Temperature             | SSC |
| RGA01256    | CGAGTTCTTCTTGGTGAGCA    | ACCTGACATCATGAAGCGAAT   | AAGTCAGAATCTCACAC  | 45                      | 0.5 | AAGTCAGAGTCTCACAC  | 45                      | 0.5 |
| RGA00888    | GGAGGATGAAGCAAGCAGAG    | GGATGCAGATTCCGATCAGT    | TACGAGTGGGCATATAG  | 45                      | 0.5 | TACGAGTGTGCATATAG  | 45                      | 0.5 |
| RGA02693    | CGATTAGCAGCTCTCATGGAT   | TTGTGGTGAGTGCTCGAAAA    | TGACCTATGTCAATGTG  | 35                      | 1   | TGACCTATCTCAATGTG  | 35                      | 0.1 |
| RGA01388    | ATGGGAGCGTCAATTTCAAC    | AGAGCCTAACGCTGGTCTTG    | ACTATACGATCTCCATC  | 35                      | 0.5 | ACTATACGTTCTCCATC  | 35                      | 0.1 |
| RGA07052    | CGACACCGAAAAGGAAAAAC    | TGGTATGGTGCCATGTCATT    | CATGATATTTATACAGG  | 35                      | 1   | CATGATATATACAGG    | 35                      | 1   |
| RGA00413    | CCAGGGAAGTGGAATCTCA     | AGGACCAATTGACACGGCTA    | ATCGGAGATTTTGGTGT  | 45                      | 0.5 | ATCGGAGAGTTTGGTGT  | 45                      | 0.5 |
| RGA01339    | TCCCCACACCACATCTTACA    | AATGATCGGCCCTTTGATTTG   | TTTACTTCGGTTTTGAG  | 45                      | 1   | TTTACTTCGGTTTTGTG  | 45                      | 1   |
| RGA01095    | CGGAAAGCCAACCATCTCTA    | CGCAATGCTCAATCCTAACA    | AGGATCTTTTTCTCCAA  | 45                      | 1   | AGGATCTTCTTCTCCAA  | 45                      | 1   |
| RGA00073    | CTTCTCTGCTTTGCCTCCAC    | ATGCTCTTGTGAGCCGCTT     | TTTCTAAACAATCTAAT  | 35                      | 1   | CTTCTAAATAATCTAAA  | 35                      | 1   |
| RGA00793    | CGCATTGCTCTCATACTCCA    | TCGCTCACACACTTCTCACC    | TTGAAAATGGAAACATG  | 35                      | 0.5 | TTGAAAATACAAACATG  | 35                      | 0.5 |
| RGA00105    | CACCCCTGCTTTCCTAAGG     | GCAGATCCATTCTTGAGGT     | CACCACATGAAGTAAA   | 45                      | 1   | CACCACATCAAGTAAA   | 45                      | 1   |
| RGA06967    | TGGACTCCCGGATGATAAAC    | TCGCAATCTCAACAGTCGTC    | ACTGGCCAGAGACTAAT  | 45                      | 0.1 | ACTGGCCATAGCCTAAT  | 45                      | 0.1 |
| RGA02490    | GTCCCTTCCCTTCCAGATTC    | CACACACAGCTTCCATGCTT    | ATCTTGATACCAAATC   | 45                      | 0.1 | ATCTTGATGCCAAATC   | 45                      | 0.1 |
| RGA00645    | TTTGCTGTGCTCACGTTTTT    | ACTGAACGGCTGCTCCTAAA    | CATTTAATACTGATAAC  | 35                      | 0.5 | CATTTAATGCTGATAAC  | 35                      | 0.5 |
| RGA07150    | TCACCACATCCGCTATGAGA    | AGGTTCTTCCCGTTCACTT     | TGCAAGATCGAAGTAGC  | 45                      | 0.1 | TGCAAGATGGAAGTAGC  | 45                      | 0.1 |
| RGA03718    | TTGAGGCAGTCAAGATGTCG    | TTGAAACAAGTTGCAGCACA    | ACCTGAGATAGCTTTGT  | 45                      | 1   | ACCTGAGACAGCTTTCT  | 45                      | 1   |
| RGA00159    | GGCCAAATTTAACCTCCACA    | AAAATCTGAACTGTCCACAAGC  | TGTCTGTTATTATAAAC  | 35                      | 1   | TGTCTGTTCTTATAAAC  | 35                      | 1   |
| RGA00979    | ACAATCCATGCGTGTGATGA    | GGCTGGAGAAAATAGCCAGA    | AAATGTCGTAATTTAAT  | 40                      | 0.5 | AAATGTCGCAATTTAAC  | 40                      | 0.5 |
| RGA00250    | TGGCATGTTTTAGGGATGGT    | AAGGATGCATGTTGGTCGAT    | TATATGTGAACAAATGT  | 35                      | 0.5 | TATATGTGTACAAATGT  | 35                      | 0.5 |
| RGA01191    | TAGGCAGTGGCTTCATTGTG    | GGTTCGTGTGTGTGGGTACA    | ATCAAGGTCACAGAAGC  | 45                      | 1   | ATCAAGGTTACAGAAGC  | 45                      | 1   |
| RGA00046    | TCGCTGGAAACAACTTGAA     | AGATAACCACGACCGCAAAC    | CACCTTAGCCCTAGACA  | 45                      | 0.5 | CACCTTAGCTCCTAGACA | 45                      | 0.5 |
| RGA13794    | GAAAACCTCTGCGATGGGAAA   | CGGCCCTAGAGGTATAAAGG    | TAGCCAAATTTGCGAAT  | 45                      | 0.5 | TAGCCAAACTTCGCAAT  | 45                      | 0.5 |
| RGA00945    | CGAAAACCTGGAAGTTGTCGTG  | CGGGGAAATCCAAATGTTTA    | AAAACATAAGATCCCAG  | 45                      | 1   | AAAACATAGGATCCCAG  | 45                      | 1   |
| RGA03572    | CGAATAAACGGGCATGAGTT    | CCGGGTTTGTAGACCTTGTTA   | TTTACATGCTTTACCCA  | 45                      | 1   | TTTACATGATTTACCCA  | 45                      | 1   |
| RGA00454    | CGCAAGTGCAGCCTACTAC     | GTGGTGCAGGACAAATCTCA    | CCATCGTCCATGCGTTC  | 45                      | 0.1 | CCATCGTCCATGCGTTC  | 45                      | 0.1 |
| RGA01070    | TGCTGGCATAGCTAACTCC     | CTTGTC AACGTAGGGCCAAT   | TAATAGTAGGTAAGCCC  | 45                      | 1   | TAATAGTAAGTAAGCCC  | 45                      | 1   |
| RGA00089    | CCGGAAGAACTCCACTGAAA    | TGGTAGGTGCAGTTCCGACT    | CTCATGTCCAGAAGTGA  | 45                      | 0.1 | CTCATGTCCAGAAGTGA  | 45                      | 0.1 |
| RGA05944    | CAGTGGGATCAAGTGCATCA    | GAAACGGCTGATCAAAGACC    | TCATAAGCTTCTGTGTA  | 40                      | 0.5 | TCATAAGCGTCTGTGTA  | 45                      | 0.5 |
| RGA01214    | TGAACAGCAGCTCAAAGACG    | CAGTCGTGGGTGAGTGAGTG    | CTTCATTCTGGATTTTA  | 35                      | 0.5 | CTTCATTATAGATTTTA  | 35                      | 0.5 |
| RGA00018    | GAGGTGGAGACTCCTGGTGA    | CGTGCAACGGACATTACATC    | AACACTGTAATCAATAA  | 35                      | 0.5 | AACACTGTTATCAATAA  | 35                      | 0.5 |
| RGA00016    | TTAGATTCGGTTTGCCTTGG    | ACACTGGACGTGGAAGAGG     | AGGTGTATAAAACCCTA  | 45                      | 0.5 | TGGTGTATGAAACCCTA  | 45                      | 0.5 |
| RGA00035    | CTCATCAAACAATAATGCACCA  | TCAAAACAGAACAACCAACAAAA | ACATTAAC TAAGTAACT | 40                      | 1   | ACATTAACCAAGTAACT  | 40                      | 1   |

|            |                        |                        |                    |    |     |                    |    |     |
|------------|------------------------|------------------------|--------------------|----|-----|--------------------|----|-----|
| RGA03229   | AAACCGGACCTAACCAAAACA  | GGGAGGTCAGAGAGAAGCAA   | GGTTTACTCTATGGTTT  | 40 | 1   | GGTTTACTTTATGGTTT  | 40 | 1   |
| RGA00237   | TCAAAAGCCACGTTTTTCATTT | GCTAACCCGCCATTATCAAA   | CCAATCAAGAATGTCCA  | 45 | 1   | CCAATCAACAATGTCCA  | 45 | 1   |
| RGA00019   | TTGCAGCGTTTCTGTTATGC   | CACATTGTTTGAGGGTGCAG   | GAAGGAATGATACAAGG  | 35 | 0.5 | GAAGGAATAATACAAGG  | 35 | 0.5 |
| RGA00043   | AGCAATGCTTCGAGTCCTTT   | ATGCGAGTCCGAGAAGCTAA   | ATGTGAAGGGAAGTTCT  | 45 | 1   | ATGTGAAGAGAAGTTCT  | 45 | 1   |
| RGA01945   | TCCAACATATACGCCGTTCA   | CGATTTCTCCACGTGGTCTT   | GGCACTAACTAAAAGT   | 45 | 1   | GGCACTAACCTAAAAGT  | 45 | 1   |
| RGA00842   | CGCACGCAGTGATAAGAAAG   | AAAGAACTCGCGAGGAACA    | GTTATAACTCATACTGT  | 45 | 1   | GTTATAACGCATACTGT  | 45 | 1   |
| RGA01070   | CAATCACTCCGACTCCCACT   | TGATGACTGCTGGAACAGG    | TCCCTGTTCTTCTTCCT  | 45 | 1   | TCCCTGTTTTTCTTCCT  | 45 | 1   |
| RGA01025   | CATGGCGAGGAATTGGTACT   | ATCATTGAGAACCGGGTCAA   | GCTTAACTTCAATGTAT  | 35 | 0.5 | GCTTAACTACAATGTAT  | 35 | 0.5 |
| RGA00092   | AACAAGGGGATGTGATTTGA   | TAGGCACGGCTTTCACCTT    | CTAAAGTATGAGTGGAC  | 45 | 1   | CTAAAGTACGAGTGGAC  | 45 | 1   |
| RGA02573   | TTTCTGCGCCTAACACAATG   | AGCAGAAAGCCTGTGGAGAA   | TCCAACAACAGAAAATC  | 45 | 1   | TCCAACAAAAGAAAATC  | 45 | 1   |
| RGA01233   | GCCATCTCCAAAGCAAATA    | AATTCTTGTCTGCCAAATCG   | TCAAAATTTTCAGTCTC  | 40 | 0.5 | TCAAAATTATCAGTCTC  | 40 | 0.5 |
| RGA02492   | CGGACTCAATGCCTCTTCTT   | AACGACGCTTCTTCTCATCA   | GGTTAACTTAAACCCA   | 45 | 0.5 | GGTTAAACCTTAAACCCA | 45 | 0.5 |
| RGA10835   | CCAAACGAGCAAAGAAAGC    | GGAAAGACCGCAAGTGATGT   | AGTTTAAACATCACGTGT | 45 | 1   | AGTTTAAACGTCACGTGT | 45 | 0.5 |
| RGA01378   | TTCCCACTTAATTCGCGTTG   | TTACTGGAATCTTTCGACTGC  | GATGTCTTTTGAAAATT  | 35 | 0.5 | GATGTCTTCTGAAAATT  | 35 | 0.5 |
| RGA00304   | TGGAACAACAAAGCATGAGC   | CGTTGGTGAACTTTGCTTCA   | ATCGTCTACGTTTCATTC | 45 | 0.5 | ATCGTCTATGTTTCATTC | 45 | 0.5 |
| RGA02393   | AATTCCTGCCTCAGAGCAAA   | CTCCAGAAAGCGTGAACACA   | TCATTGTTAAGTAGTAC  | 35 | 0.2 | TCATTGTTCAAGTAGTAC | 35 | 0.2 |
| RGA02777   | CCGGGAGAGACAGTCATGTT   | TGGACTACCTGCACAATGGA   | TTTTGACAAGCCAAAGT  | 45 | 0.5 | TTTTGACAGGCCAAAGT  | 45 | 0.5 |
| RGA00141   | AACCGCATGTGAAGTTTTCC   | ATCATTCAACGGTTGGGGTA   | TGAGGAATATGTAGAGA  | 40 | 0.5 | TGAGGAATGTGTAGAGA  | 40 | 0.5 |
| RGA01783   | AGAAAGCCACCTGCGTCTAA   | CACGTGGTTTATGCTTGTGG   | GATTCATATGACACCAA  | 45 | 1   | GATTCATACGACACCAA  | 45 | 1   |
| RGA02221   | TTGTCCACGTGTCAGTCGTT   | CCTTCCACCAGTTCACCTA    | GCTAGTTAGTATCATAT  | 35 | 0.5 | GCTAGTTAATATCATAT  | 35 | 0.5 |
| RGA00051   | AGTCGTTCCAAGGGGAGAGT   | CAAAGCACAAAACCCGATT    | CTCTTTTTGACTGTCTT  | 35 | 0.5 | CTCTTTTTTACTGTCTT  | 35 | 0.5 |
| RGA00236   | ACGTGGACATGTTTGGATCA   | ATGGTGAAAGGCCAAGACTG   | CACCTTCAAGAGATCAT  | 45 | 1   | CACCTTACGAGATCAT   | 45 | 1   |
| RGA00150   | CGCCCTTAGAACAGCTTCAT   | TGTTTCATGGGATGAGTTCCA  | GCCAATGTGAATTCTAA  | 45 | 1   | GCCAATGTAATTCTAA   | 45 | 1   |
| RGA00721   | CGAAAACGAACAGCATTTTT   | TTTCACTGTCGTCGCATTTA   | CGGTGCAAGAGTAAATA  | 45 | 0.5 | CGGTGCAATAGTAAATA  | 35 | 0.5 |
| RGA01154   | TGGGCAAATTTTTGAATCAT   | CCCATTCAACATACGACCAT   | AATCTAGAATAGAGAAG  | 45 | 0.5 | AATCTAGAGTAGAGAAG  | 45 | 0.5 |
| RGA00011   | ATGTTGGGTCCCTTCAACAAA  | AAGCATCGAAATGCAGAATC   | AGTATTATACTATTATT  | 35 | 0.5 | AGTATTATGCTATTATT  | 35 | 0.5 |
| RGA00323   | CAGAGTGGGAAGCTTTGGAG   | GCACCCAGTCGTATGAACCT   | ACATAAGGCTCTCCCTA  | 35 | 0.5 | ACATAAGGTTCTCCCTA  | 35 | 0.5 |
| RGA00606   | AATCCATAATCGCAGATCCA   | ATCTTGGATTGAGCAGCAAG   | TTGATATAGATCATAGT  | 45 | 0.5 | TTGATATAAATCATAGT  | 45 | 0.5 |
| RGA01128   | TTGCTCTCGTTGTCTGTGG    | TCCTCGGGAGTCTGAGTGAT   | TCTCGTCGACGAACTCA  | 45 | 0.2 | TCTCGTCGGCGAACTCA  | 35 | 1   |
| RGA00397   | TCGATTGAACCACTGACCAA   | GAACCAGGCAACTTTCAGGA   | ACTAAACTTTTTTATTT  | 45 | 1   | ACTAAACTTTTTTATTT  | 45 | 1   |
| RGA01510   | TCGAACTGAAAAGGGCTCAC   | AGCCCTCACAATTTTTGGAA   | CTTTTCATGGATCTTGC  | 35 | 0.5 | CTTTTCATAGATCTTGC  | 35 | 0.5 |
| RGA03795   | TCAAAGAAGAGAGCGGGTGT   | TTGCAGCCCTAGCCTTCTAA   | CTCATATCCAATCTGTG  | 35 | 0.5 | CTCATATCGAATCTGTG  | 35 | 0.1 |
| RGA00832   | AGCTCTCTGGATCACGCCTA   | ATCTGCATATTGCCCTGGAG   | ATAAAGTCAGCTCTTTT  | 35 | 0.5 | ATAAAGTCGGCTCTTTT  | 35 | 0.5 |
| RS2CL1103s | GTGGTGCAGGACAAATCTCAAA | AGATTGCTCACAACGGAAGGAT | AGTCAAGGGTCGCCCTA  | 50 | 0.1 | AGTCAAGGGTCGCCCTA  | 50 | 0.1 |
| RS2CL1107s | TGGTCCAGCTCCAGAAAGTGTA | TTGCTCGCTCTCGAATTGTAAC | ACCACATGAAAATATCC  | 35 | 0.5 | ACCACATGGAAATATCC  | 35 | 0.5 |

|            |                         |                         |                    |    |     |                    |    |     |
|------------|-------------------------|-------------------------|--------------------|----|-----|--------------------|----|-----|
| RS2CL1124s | ACCTAAACCAAACCCCTCCGATT | GGTCTGCGTACCGAAAAAGATT  | TCCAAACGCGTCGAGAC  | 40 | 0.5 | TCCAAACGTGTGCGAGAC | 40 | 0.5 |
| Rs2CL1221s | ATGCAAATCGCTACAGCTTCTG  | TGCTCACTGGCGAAAAGAGTAA  | ATGAATAAATTTTACGG  | 35 | 0.5 | ATGAATAAATTTTACGG  | 35 | 0.5 |
| Rs2CL1337s | CCACGAAGCTCTTCTCACCTT   | CCTTTGCCATCAGAGAACAAC   | TTCTTGTTCTACTGAAA  | 35 | 0.5 | TTCTTGTTGTAAGAAA   | 30 | 0.5 |
| Rs2CL1347s | TGACAAGCACATGTACCACGAC  | GCCGACAGTAGGTGTTTTGACA  | GCTAGCCGAGAAAAGGAA | 50 | 0.5 | GCTAGCCGTGAAAAGGAA | 50 | 0.5 |
| RS2CL1353s | AAAGAACCGATGGTGATTGGAC  | ATCCCATCTGCACCTAGCTGTT  | GGAGTGAAACATCTAGT  | 40 | 0.5 | GGAGTGAAACATCTAGT  | 40 | 0.5 |
| Rs2CL1468s | TGAAGAAGGGAAACCTCTTTTCG | CGACATAAAAGCATCCAAGTGC  | TTATTCACCTGCGTTCT  | 45 | 0.5 | TTATTCACATGCGTTCT  | 45 | 0.5 |
| Rs2CL1478s | GAAGCTGCAGCAAACAACCTAA  | ACTTGGAGCACGTGATTTCTGA  | CTAAAGCTGTTGACCTG  | 45 | 0.5 | CTAAAGCTCTTGACCTG  | 40 | 0.5 |
| Rs2CL1480s | GGCACGCTTTTCTACAGTGGAT  | AACAGAATCATCAACCGGAGTC  | TACTTGTTGTTTTCTT   | 40 | 0.5 | TACTTGTTGTTTTCTT   | 40 | 0.5 |
| RS2CL1483s | GGGATGATCGATTACGACAACA  | CCTCAGGGGAAATGAAAGGATA  | GTGGAGGAAAAGAAGGT  | 40 | 0.5 | GTGGAGGAGAAGAAGGT  | 40 | 0.5 |
| Rs2CL1500s | AGGAACTCCTTTTGCAGACGAC  | AAGATGCGTACCTTGTGCATGT  | TGCATTTTCTTAACGAT  | 45 | 0.5 | TGCATTTTGTAGCGAT   | 40 | 0.5 |
| RS2CL1509s | ACGGATGCAAGCTTGAAGAACT  | GAGCCAAGGTTCTCAAACCACT  | TGGAACAGTGTTGGCTG  | 45 | 0.5 | TGGAAGAGCGTCGGCTG  | 45 | 0.5 |
| Rs2CL1513s | CTCGTTGTCTTCACCACCAACT  | TCTTCAACTAGAACGCCACTCG  | GATTGTTTCATATAGAGA | 35 | 0.5 | GATTGTTTCGTATAGAGA | 35 | 0.5 |
| Rs2CL1517s | TCGGAATACCCTTTCTGAGAC   | GCTTAACTACTGACCGCAGCAA  | TGATCTCACTGTATATA  | 35 | 0.5 | TGATCTCATTGTATATA  | 35 | 0.5 |
| Rs2CL1549s | TCGAACCATCTTGGTGTGAAC   | GCTTAAAGAGGTGTGGCATGTG  | TAACTCATGATTTGATA  | 40 | 0.5 | TAACTCATAATTTGACA  | 40 | 0.5 |
| Rs2CL1620s | GCCAAATTACGACCTTCTCTGT  | TACTCTTGGGTTCCATCGCTTT  | TGGAGTCAGTTCCTTAT  | 45 | 0.5 | TGGAGTCACTTATAATG  | 40 | 0.5 |
| Rs2CL1633s | GCCGCAAAGCTTATCATCAA    | CGATACTCAGCAAGTGCCATA   | AGAAACACTTTCCATT   | 50 | 0.5 | AGAAACACTTTCCATT   | 50 | 0.5 |
| Rs2CL1639s | TGTTGCACAACGCAATGACTAC  | CAGTGTGAAGCAAAGGGAATG   | GTGTTAACCATATGCGA  | 40 | 0.5 | GTGTTAACAATATGTGA  | 35 | 0.5 |
| Rs2CL1647s | CCAAACAGAAAACAACCAGACG  | CGGGAAAAGTTATGGCTAAACC  | ATAATGGTCAACTTTCT  | 40 | 0.5 | ATAATGGTAACTTTCT   | 35 | 0.5 |
| Rs2CL1650s | ACCTTTTCGAGACAAGCCTCATC | ACCCCCAAGGAGAAAAGAGAAAG | TCTCGCTGACAGATAA   | 50 | 0.5 | TCTCGCTGAACAGATAA  | 40 | 0.5 |
| Rs2CL1651s | TCTTGTCATGTGCGGCTATCTT  | GATACCGGAAACCATTTCTTCG  | ATTAGGTACGTATAAGA  | 30 | 0.5 | ATTAGGTAAGTATAAGA  | 30 | 0.5 |
| Rs2CL1671s | ATGTCCAGAGACGCCGATAGTT  | CCTCAGGCAACCAATTCAGATT  | GTTTTTGTGTTAAAGAG  | 35 | 0.5 | GTTTTTGTGTTAAAGA   | 35 | 0.5 |
| Rs2CL1672s | GGGTCACGTGAAAGTTTGGATT  | CACGGATCTGCTCAACTTTCTT  | GAAGCCATCTCGAGGCA  | 50 | 0.5 | GAAGCCATGTCGAGGCA  | 50 | 0.5 |
| Rs2CL1678s | ATCCTCACATTCATGTGCAACG  | TACTCTGACAACCTCCCGCAGA  | ATCTTGGTTATTAATTT  | 35 | 0.5 | ATCTTGGTGATCAGCGT  | 35 | 0.5 |
| RS2CL1685s | GAGATGGAGACTGTGCAAATGG  | GGGTGGCTCAAAAAGGATTAACA | CTGCAAAAAATTCACA   | 40 | 0.5 | CTGCAAAATTTTACAC   | 35 | 0.5 |
| Rs2CL1694s | GATCTGTTCCGCATGGAAGATA  | GCATCCGATCAAAAAGTCTCTG  | TACGATCTTCTTCATCC  | 40 | 0.5 | TATGATCTACTTCATCC  | 35 | 0.5 |
| Rs2CL1695s | TCGATCACGTATCATCTCCTT   | CGTAACCTCTTCAAACCCCAAT  | ACTCGATTCGTGTTTAT  | 40 | 0.5 | ACTCGATTTGTGTTTAT  | 40 | 0.5 |
| Rs2CL1713s | CAGATTGTTTGCTTCTGCAAC   | CATTTGCTCAAGATGCTCCAAC  | TCGTAACCCGAAGCTGC  | 45 | 0.5 | TCGTAACCTGAAGCTGC  | 40 | 0.5 |
| Rs2CL1741s | AGGAAAACCTTGGCATGGGAAC  | CCACGAGGTTACAAAGCCCTTA  | GTCACACTGAATGGAAT  | 40 | 0.5 | GTCACACTCAATGGAAT  | 40 | 0.5 |
| Rs2CL1743s | CATGCCATCTTCCATCATAGC   | TTCCAGTACAAGCTGGCCATTA  | AAGCTTAACTGGCCAAT  | 45 | 0.5 | AAGCTTAAATGGCCAAT  | 40 | 0.5 |
| Rs2CL1745s | AGCGAGCCATTGCTTCTATTTT  | CGACTCCGAGATTCAACACAAC  | TTTTACTCCATGAATAG  | 40 | 0.5 | TTTCAGTCTATGAATAG  | 40 | 0.5 |
| Rs2CL1765s | AGCTTGAACCTTTCTTGCCGTA  | GGAGGCTCGTTCTATCTTCCAA  | CTCACATCGTCCGGGTC  | 50 | 0.5 | CTCACATCATCCGGGTC  | 50 | 0.5 |
| Rs2CL1769s | GCTGACATGGGTAATGCAGATG  | TAATGAAACGCTTGCTGGTCTG  | GAGCTTTCCCTTTAGCT  | 50 | 0.5 | GAGCTTTCTCTTTAGCT  | 45 | 0.5 |
| RS2CL1784s | CTGCTTCGCAATTCCTTATCT   | GACGGAGATGACAGTTCAAAAA  | AGTTAAAGTTGATGGAG  | 45 | 0.5 | AGTTAAAGCTGATCGAG  | 45 | 0.5 |
| Rs2CL1785s | TTTCTGGCAACCGTAAGGCTAT  | AGTTTCTGTACACACCGACCA   | GAGGATGTGGCTTACCC  | 50 | 0.5 | GAGGATGTCGCTTACCC  | 50 | 0.5 |
| Rs2CL1791s | AAGACGAAGTCTGCATTTGTGC  | AGTCGCAGTAACACGTTTTTGG  | CTGTTTGGGTTAACATA  | 40 | 0.5 | CTGTTTGGCTTAAACATA | 40 | 0.5 |

|            |                         |                         |                   |    |     |                    |    |     |
|------------|-------------------------|-------------------------|-------------------|----|-----|--------------------|----|-----|
| Rs2CL1793s | GGATCGTTACAACGCATCTCAA  | AGCGTAAACCAGAGCTCTCACA  | CTCTCTCTTTCTGTTTG | 35 | 0.5 | CTTTCTTTCTCTGTTTG  | 35 | 0.5 |
| Rs2CL1800s | ACATGTGAGACGGCAATACAGC  | GGCCAAAGCCAAGTGATCATA   | CTAAATAAGTTCGAGTG | 35 | 0.5 | CTAAATAAATGCGAGTG  | 35 | 0.5 |
| Rs2CL1806s | AAGGAGCGTGTGAGGAGAAAAG  | ACAAGAACCACCCCTAAGAGCA  | GATTCTCTGTGATTTTT | 35 | 0.5 | GATTCTCTGTGATTTTT  | 35 | 0.5 |
| Rs2CL1826s | ACCACCACCTCTAAAAGCAAGG  | CTCACAGGCAAAGAGATCGAAA  | TGTTTTCCGGCGTAGAT | 50 | 0.5 | TGTTTTCCAGCGTAGAT  | 50 | 0.5 |
| Rs2CL1833s | AGTGCAGGTTGTGTATGGGAAG  | TGCAGGAAGCTTACTCCTTCAA  | TCTTCCATTTGATAACC | 35 | 0.5 | TCTTCCACCAGATAACC  | 35 | 0.5 |
| Rs2CL1849s | TTGATATCGAACCAACCGACAC  | AAACACAACCACCACCCCTAAG  | TACTTGTTGGAATTTTA | 35 | 0.5 | ACTTGTTGGATTTTA    | 35 | 0.5 |
| RS2CL1855s | TCTCCTCCTCGCCTACAAAATC  | CCCAAACGTGTAAGAGACACCA  | GATCTGCTCTGGTCTGA | 45 | 0.5 | GATCTGCTTTGGTCTGA  | 45 | 0.5 |
| Rs2CL1884s | AACCGTTCTGCTGAAGTTTTCC  | GACAAGCCGGTTGAAGCTAATC  | ACGGTTGCCCGCATAGA | 50 | 0.5 | ACGGTTGCTCGCATAGA  | 50 | 0.5 |
| Rs2CL1936s | AACGAGTTCATGACAAGACCA   | TATAGCAACATGACGGACACCA  | CATATCTTACCATCGT  | 30 | 0.5 | CATATCTTACCATCGT   | 30 | 0.5 |
| Rs2CL1958s | ACTTCAACGCCGTTTCTTCTTC  | CGTTTGTCTTGACCTTGGAGA   | GTGTTAATCAACAAGA  | 35 | 0.5 | TTAATCAAAGAACCAAG  | 35 | 0.5 |
| Rs2CL1966s | AACACGAGCTGTGGACATGTTT  | GAAGGAAGCTCTCGGTGATGAT  | CATGTTCCCGAAGCTTC | 45 | 0.5 | CATGTTCCCTGAAGCTTC | 45 | 0.5 |
| Rs2CL1970s | GACGTTGGAGGCAAGATCTCTA  | GCTGTCCAGCTAGCCAAAATCT  | ATCCCCTTTGCATCAAG | 45 | 0.5 | ATCCCCCTCGCATCAAG  | 45 | 0.5 |
| Rs2CL1980s | TCGTTCTGTTTTCTGTGTCCT   | TTGAGATCTCTCGTCCAGTTCCG | GGTCAACAATACATGGC | 40 | 0.5 | GGTCAACAGTACATGGC  | 40 | 0.5 |
| Rs2CL1984s | CGAAGATCACAGAGGTTGATCG  | TGAGTCCGCTTCTTCTTCAATG  | CTGAGATTGAAAAGGT  | 45 | 0.5 | CTGAGATTGAAAAGGGT  | 45 | 0.5 |
| Rs2CL2028s | TTAGCACTTCTTCCCCAAGA    | TAACCCAAGAAGCAGACTTTG   | GAGCTGAAATTTTTATC | 35 | 0.5 | GAGCTGAAGTTTTTATC  | 35 | 0.5 |
| Rs2CL2045s | TGGGACCAAAGTGTCGAATATG  | TTAAGCAGCAACGTCTTTGTCC  | GAGACAATACCGCCGCC | 50 | 0.5 | GAGACAATGCCGCCGCC  | 55 | 0.5 |
| Rs2CL2052s | GTACCCACCCTTCAATGGTT    | TGGTTGGAGTCTCCTTATGGT   | AGATGTTACCTATCTAT | 30 | 0.5 | AGATATTATCTATCTAT  | 30 | 0.5 |
| Rs2CL2077s | GCAGACAAAAGTGGATTGTTT   | GTTTCGCTACACTCCCAAAAAC  | GGAAATGATATTGAATG | 35 | 0.5 | GGAAATGAAATTGAATG  | 30 | 0.5 |
| Rs2CL2106s | CTGAAGTGCTTTTGTTCGGTTG  | CTGTTTAGATGGAAGGCATGTG  | TCAATCTTATAGACAAC | 40 | 0.5 | TCAATCTGTAGACAAC   | 45 | 0.5 |
| Rs2CL2111s | GTGGCAAAGCTTCAGTATTTGG  | CTGCTGAACGAGCATTCAAGAT  | ATGTAAGACATACTTCC | 40 | 0.5 | GTAAGAGACGTACTTCC  | 40 | 0.5 |
| Rs2CL2150s | GGTTCACCTTCTCCCTCTCCAAA | ACAGCATCCCTTTTATCCATCC  | AACCCATCACAAGTAGG | 45 | 0.5 | AACCCATCCGAAGTAGG  | 45 | 0.5 |
| Rs2CL2167s | CTTTGTCTCCAATGGCGTTC    | GTTAACAAAGCCGCCGATCTT   | TTCGTTGAAATTTTGA  | 40 | 0.5 | TTCGTTGATGTTTTGA   | 40 | 0.5 |
| Rs2CL2178s | GGGGTGC GTTATACGAAGTTGT | TCCAGAGCATGATGTTGTTGTC  | CCGCGCGAGGAGAGATG | 50 | 0.5 | CGCCGCGACAAGAGATG  | 50 | 0.5 |
| Rs2CL2196s | CATGGGTGGAATGGAAGAGTTT  | TCTGGAACGAACAGCAACTTCT  | ATAACGTATTGAAATGG | 35 | 0.5 | ATAAGGTAGTGAATGG   | 40 | 0.5 |
| Rs2CL2197s | AAGTCACTTGAGAGCAGCAACG  | ACTACAAAAGCCTCACGTGCTC  | CAGGAAGTGGACGAGGA | 40 | 0.5 | CAGGAAGTTGATGAGGA  | 40 | 0.5 |
| Rs2CL2199s | GTGCAGAAGATTTGGAGAAGGA  | ACTGCATCATCAACTCCAGGAA  | AGGTTAATAATGTCTAT | 35 | 0.5 | GGTTAATTATTGTCTAT  | 35 | 0.5 |
| RS2CL2201s | AGGAGGAAACGAAGAAGCATTG  | GGAAGAGTGAACATTCCACGAA  | AAGGAAGCGAACAAGTC | 35 | 0.5 | AAGGAAGCTACAAGTC   | 35 | 0.5 |
| Rs2CL2203s | TAAAGGGCACAGTCAGCATCAT  | TCTCCCGGAGTTCAAACATTTT  | CCCCCGGCTAAGTTCGC | 50 | 0.5 | CCCCCGCCAAGTTCGC   | 50 | 0.5 |
| Rs2CL2226s | ACCCAACAGAGGAGGAACTTTG  | TGGGAGGAATGTTACAACAACG  | TGAGATCACGCCGTCTT | 45 | 0.5 | TGAGATCAAGCCTCCTT  | 45 | 0.5 |
| Rs2CL2236s | ACCATTACCATGTTCTGTCATGC | TGATTCCCTTCCCTGGATCTAA  | GATTTTTGTCTGTAATT | 35 | 0.5 | GATTTTTGCCTGTAATT  | 35 | 0.5 |
| Rs2CL2240s | CTGCAGATCCATCTCCACAAT   | ATGGAATCTTACCAGGAGGAA   | TCTCTTTACGTTTTCAA | 35 | 0.5 | TCTCTTTATGTTTTCAA  | 35 | 0.5 |
| Rs2CL2263s | GGAAATTCACCTGAAGCTGGT   | CGCATGTCTTCCATTCTTTCAC  | CTACGCACGCATATGAT | 45 | 0.5 | CTACGCAGACATATGAT  | 45 | 0.5 |
| Rs2CL2264s | CATGGGTGAGAAAGGTCTGATG  | GAAAACAACCGGAACATCACT   | CATCTTTGACAAGATC  | 40 | 0.5 | CATCTTTGAACAAGATC  | 35 | 0.5 |
| Rs2CL2267s | GGGAATTTGCACTCCAGAAAGT  | AGATGCTCAATGGTGTGATGA   | TAAATCAATCTATTCT  | 30 | 0.5 | TAGAATCAGTCTATTCT  | 35 | 0.5 |
| Rs2CL2268s | TTGAGGCCTGCTGAGTACAAGA  | GAAACGTGAAATGTGGACGAGA  | TACGGCTCATTGACCAA | 45 | 0.5 | TTCTGCTCTTTGACCAA  | 40 | 0.5 |

|            |                        |                        |                    |    |     |                    |    |     |
|------------|------------------------|------------------------|--------------------|----|-----|--------------------|----|-----|
| Rs2CL2272s | AATCTGAAACCCAGAACAGGA  | ACTTGAATGCGTCTGCAACAAC | AAACCAGCCAAGAAGAA  | 45 | 0.5 | AAACCAGCGAAGAAGAA  | 45 | 0.5 |
| Rs2CL2284s | CCCTCGATTCCAAACTACTTG  | TCAGTGAGAGGCTGCTTGCTT  | CAATAGTACAACCTTGCT | 35 | 0.5 | CAATAGTAGAACTTGCT  | 35 | 0.5 |
| Rs2CL2299s | AATAAAGTAATGGGGCGTGTGG | AATCACACCAGGAAGGCTAAGG | GTTTTAACTAGAGATTT  | 35 | 0.5 | GTTTTAACGAGAGATTT  | 35 | 0.5 |
| Rs2CL2329s | CACGACCATCCACTCTTCAATC | GATTTTAGCTACACGCCAAGG  | TCCTCAACTGGTACAGC  | 45 | 0.5 | TCCTCAACAGGTACAGC  | 45 | 0.5 |
| Rs2CL2337s | CGTTCGCCAGACGTAATGTATC | TCTGTGACTCATTTCGGCTTTC | CAACCGGGACAAGAATC  | 35 | 0.5 | CAACCGGGCCAAGAATC  | 50 | 0.5 |
| Rs2CL2338s | CTTCTGTTCCTCAAACCTCCAC | GGATCCACCTTTAAATCCACA  | ATATAATAATGGACATT  | 30 | 0.5 | ATATAATAGTGGACATT  | 35 | 0.5 |
| Rs2CL2348s | TCCATGCGTGGAAGACTTTG   | CAATCGTCGGATCAGCAAATAG | AGCTATGTTTTCTATA   | 35 | 0.5 | AGCTATATATTTCTATA  | 35 | 0.5 |
| Rs2CL2367s | GCGATGGCTTCCACTTCTT    | ACACAGCCAACCAACAACAAC  | TAACTGTAGCTCTCTA   | 40 | 0.5 | TAAGTGTGAGCTCTCTA  | 35 | 0.5 |
| Rs2CL2368s | CCCTAGCAAAGTTTTGGAGCAT | ACGTTGGTACAAATGAGCCTGA | TCATTGATGGCAACGCA  | 45 | 0.5 | TCATTGATCGCAACGCA  | 45 | 0.5 |
| Rs2CL2374s | AAGAGAACCTTGCCACCAGTTC | TCTTCTCCTCCATTTCCCTCA  | AGAAATCACAGCCATTC  | 45 | 0.5 | AAAAATCAAAGCCGTTT  | 45 | 0.5 |
| Rs2CL2383s | ATGGAAGTGTGCGGGACTTAT  | ATTCGTGTAGCCTGCTTCCTTC | TAGTATTGGTTAGGATC  | 35 | 0.5 | TAGTATGGTTTAGGATC  | 35 | 0.5 |
| RS2CL2387s | AGAACTTTAACGGGGCAAAGA  | TCTCCCATACACACACTCCA   | C TTCAGGGTGAATAAG  | 50 | 0.5 | C TTCAGTGTATAATAAG | 50 | 0.5 |
| Rs2CL2399s | CGTGAGTTTATCCATGCCAAAG | TGGACTCTTTAAACGACCACGA | ATTTTGAAGGAGAAGCC  | 40 | 0.5 | ATTTTGAAGAGAAGCC   | 45 | 0.5 |
| Rs2CL2428s | ACACTTTGGTGAAGCCTTCC   | CAGCGTCCATTCAAATCTCAAC | AAAGCTCGTCGTGTTAG  | 45 | 0.5 | AAAGCTCGCCGTGTGAG  | 45 | 0.5 |
| Rs2CL2460s | GCCTGCTCATGAAAAGAAAGA  | GAAGAAGAGGCCTCAATTGCTC | CATCCAGCCCATTCTAT  | 45 | 0.5 | CATCAATCACATTCTAT  | 35 | 0.5 |
| Rs2CL2464s | AACAGATGTCGATCCCAGAGT  | AGATTTTAGCTCCCTCCCATC  | CCTTTTTATGAGTGTTT  | 35 | 0.5 | GCCTTTTACGAGTCTTT  | 30 | 0.1 |
| Rs2CL2475s | AGGGTAAGATTGTCCCTGAGCA | GTTTCGGATCCGTTGTTGTTCT | AAGTTCTGATTTTAAGC  | 35 | 0.5 | AAGTTCTGGTTTTAAGC  | 35 | 0.5 |
| Rs2CL2508s | GAAATGTTGGCTGAGATGGTG  | CITTCAAAGCTCCGTCTCCAT  | AAAGAGAGATTTTGCT   | 40 | 0.5 | AGAGAGAGATTTTGCT   | 40 | 0.5 |
| Rs2CL2530s | GTGTTCCAATGTCGTGATGGAT | CTGCTTGTCTGTCTCAACTTCG | TGGTGATGAAGGTAAGT  | 35 | 0.5 | TGGTGATGCAGGTAAGT  | 40 | 0.5 |
| Rs2CL2589s | TCGAAAACCGTTTGGTACAGAT | CTCACGAGCTTACGGTTTTGTG | AGAGTGGTATTTTAGAG  | 40 | 0.5 | GAGCTGGTGTTTTAGAG  | 30 | 0.5 |
| Rs2CL2604s | TGTCACCCCTCCACTATAAGC  | AATGAAGTCGGCGACAATATCC | AAACTCACTAGGGTAAA  | 40 | 0.5 | AAACTCACAAGGGTAAA  | 40 | 0.5 |
| RS2CL2631s | ATCCCACCATGAGTGAGGCTAT | TTCTTTGAGCTCATCCCACATC | ACTTTCCCGTTGATGTG  | 45 | 0.5 | ACTTTCTAATTGATGTG  | 45 | 0.5 |
| RS2CL2655s | GTCCGAGAAACCGATCACAGTA | GTTAGGCTGCTGCTCTATTTGC | TCGAGAATGACTTGATC  | 40 | 0.5 | TCGAGAATCACTTGATC  | 40 | 0.5 |
| RS2CL2656s | GATCGATGGAAGGGATCGTTAC | GCACGTGATTCAGCATCTTTCT | GTTAAACCTTTTGTTC   | 40 | 0.5 | GTTAAACCTCTGTTCC   | 40 | 0.5 |
| RS2CL2659s | CAAACAGCAACAACAGCTCCTC | ATTATCGGTGTGCTTCGATGG  | GAAGCGGGTGTATACGG  | 50 | 0.5 | GAAGCAGGCGGATACGG  | 50 | 0.5 |
| RS2CL2669s | ACAACGTGTGAACTCTCATCC  | TCTGCAGCAGTTGAGACCATAC | TAGAATTCGATCTTTTT  | 35 | 0.5 | TAGAATCAACTTTTTT   | 35 | 0.5 |
| RS2CL2676s | CCATCTTCACCTCCACTTGAGA | CTGTAAATGCCGTCTCCATGTC | TTTCCAGCACGATGATC  | 50 | 0.5 | TTCCAGCTCGATGATC   | 50 | 0.5 |
| RS2CL2679s | AATCCACAAGCTCGAAAAGGAG | ATGTGTGTTGGCTTCTCAGCAT | CAAGAGATCCCCGAAC   | 45 | 0.5 | CAAGAGATCCCCGAAC   | 50 | 0.5 |
| RS2CL2685s | ACCAGCTCTCACATCAAGAGGA | CGTGTGGATTCACTTGACGAAT | TACAAAGAATAGTTCCA  | 40 | 0.5 | TACAAAGAGTAGTTCCA  | 35 | 0.5 |
| RS2CL2687s | GAGCCAAGCATTGGAGATAAGC | TAACAGCACCGTGAGTGTTCT  | CAAATCAACAGTGAGAG  | 35 | 0.5 | CAAATCAATAGTGATAG  | 35 | 0.5 |
| RS2CL2691s | CTGGCCTATCCTGCTTTGCTAT | AGTGCATAGATCTGTCGGTCA  | CTCAACTTATCCTCATT  | 35 | 0.5 | CTCAACTTTTCCCATT   | 35 | 0.5 |
| RS2CL2717s | ATCGGTTTGGCAGTAGCTTCA  | GCCTTCAAACACGAGCTCTT   | ATGGAAGCTGATTTGAT  | 40 | 0.5 | ATGGAAGCGGATTTGAT  | 45 | 0.5 |
| RS2CL2718s | AGGGATCTCCGATCTCAATGAA | GCTGTGCTGTCTCAAAATTA   | GCCTGTGAAGCATATAC  | 40 | 0.5 | GCCTGTAACGAATATAC  | 40 | 0.5 |
| RS2CL2738s | TACCACAAATGGCTGCAACTCT | CGTCTGATCCTGCAAGAATGT  | TTTTTCTTCAAGAGTCT  | 35 | 0.5 | TTTCTTTAAGGAATCT   | 0  | 0   |
| RS2CL2740s | GTTGTGAAACTTCCGCGTTC   | CGCCATAAACAGTTGAAGGTGA | GATGCTGTGGGTGAAAT  | 50 | 0.5 | GATGCTGTGGGTGAAAT  | 50 | 0.5 |



|            |                         |                         |                    |    |     |                    |    |     |
|------------|-------------------------|-------------------------|--------------------|----|-----|--------------------|----|-----|
| RS2CL2788s | GAAATCAGCCGTTTCAGTAACC  | CTCTCTCCTGCTCCAAAGGAAT  | AGTCTCAAAGTGTTCAG  | 45 | 0.5 | AGTCTCAAATGTTGCAG  | 45 | 0.5 |
| RS2CL3112s | TCATGGCCTTAAGCTTCTCCTC  | GTGAGGCTGTTCGTTGACATCT  | CTCCACGCTTCAAACCTG | 45 | 0.5 | CTCCACGCCTCAAACCTG | 45 | 0.5 |
| RS2CL3543s | TTAAGGGTCTTCCCTCCATGCT  | GAGGTCAAGATGGAGCAAGGTT  | ATCAGCAGTTGCGGTTT  | 50 | 0.5 | ATCAGCAAATGCGGTTT  | 50 | 0.5 |
| RS2CL3605s | GAAGATGGTGTATGCCAGCTCA  | ACAGCTTATCCCAAGCCAGAGT  | GCCTGATTCTTATCAT   | 45 | 0.5 | GCCTGATTTCTTATCAT  | 45 | 0.5 |
| RS2CL3610s | ATGGGGATGAATCGAACTCAGA  | CTGCAAAGGGTGGCTTGATT    | AAGCCCAATGGGGGTAA  | 50 | 0.1 | AAGCCCAAAGGGGGTAA  | 50 | 0.1 |
| RS2CL3614s | ACCGGTATGTACATGCAACAGC  | TCCATTCGCCGTAATAATCACC  | ATACATATATGTTATCG  | 35 | 0.5 | ATACATATGTGATATCG  | 35 | 0.5 |
| RS2CL3771s | ACGCTAAGAAGTTGGGAGGAGA  | GAGCATTCTCTTGTTCGGTCAT  | ACACAACATATCCACCA  | 40 | 0.5 | ACACAACACATCCACCA  | 40 | 0.5 |
| RS2CL3783s | TCTTGACCATCTTCTCCACCA   | TGGAAGAAACAACAGAGGAGGA  | GCACTCCTCTGTCCAGA  | 50 | 0.1 | GCACTCCTTTGCCAGA   | 50 | 0.1 |
| RS2CL3894s | AGAGGTTACGAACGGAAGGAAA  | ATCCCATGCCTATTCTCTTCA   | TTGACTTATTTAAAACC  | 35 | 1   | TTGACTTACTTAAAACC  | 35 | 1   |
| RS2CL4118s | TGTCTTCCATGTGAATCCAACC  | TGAATCTCTCACGCAGGTTTTC  | CACGAAGGCTTCAAAT   | 45 | 0.5 | CACGAAGGTTTCAAAT   | 45 | 0.5 |
| RS2CL4559s | AGATAGTGCAGCGATCACCAGA  | TGCAACAGAGACATTGGTTACG  | GGGTGGTGTGATGATG   | 50 | 0.5 | GGGTGATGATGATGATG  | 50 | 0.5 |
| RS2CL4635s | GTTACCGAAACCTCAAATCCT   | CATTCCGAATTTATCCCTGTCC  | GGTGAGAAGAATGGGAA  | 40 | 0.5 | GGTGAGAAAAATGGGAA  | 40 | 0.5 |
| RS2CL4689s | ACTGCCACAGCTGTTGAAAGAA  | TACGCTTGGGGCTTATAAGAGG  | TGAAGCGAAGCCTAGAG  | 45 | 0.5 | TGAAGCTACGCCTAGAG  | 45 | 0.5 |
| RS2CL4701s | AAAGGTGCGTTTACGGTAGCAG  | ACTCCTGTGAGGCCAAAACAA   | GCTGAAACCTTGTTTTT  | 40 | 0.5 | CTGAAACGTTTGTTTTT  | 40 | 0.5 |
| RS2CL4777s | GGGTACTTCCACCACCACATTT  | TCACCAGCTCCGATATCTTCAG  | GAGACATGTACCAAGAC  | 40 | 0.5 | GAGACATGCACCAAGAC  | 40 | 0.5 |
| RS2CL4906s | CGTCTGAAACCAAAGACTGG    | GGACTGGTTACAGTTTCGTGGA  | ACAATATGAGCTGATTC  | 40 | 0.5 | ACAATATTTGCTGATTC  | 40 | 0.5 |
| RS2CL5024s | TAACATAAACCCCAAGGCGTA   | TGAAGAAGAGTGGCGATGTCTC  | TTCCGTCACTGAAATCG  | 45 | 0.5 | TTCCGTCGTTGAAATCG  | 45 | 0.5 |
| RS2CL5083s | ACGAGATTTGAGGAACAGAAGG  | TCCTTCCGAGAATGCCTAACTC  | GCAAGGAATTTGCGTAT  | 50 | 0.5 | GCAAGGAACTTGCCTAT  | 50 | 0.5 |
| RS2CL5121s | AAGTTCCTTCGTTTTTAGCC    | AACCGTCCTCATCGTTAAGCTC  | CAGCAGCGGCTTGAAGA  | 50 | 0.5 | CAGCAGCGGCTTGAAGA  | 50 | 0.5 |
| RS2CL5128s | GACTTACTTTGGAGGCGAAACG  | ATGATGACTCCGAACAGAGCAC  | TGGGCTGACAGGTGTCT  | 50 | 0.1 | TGGGCTGAAAGGTGTCT  | 50 | 0.1 |
| RS2CL5137s | TTCATTGCATGTGAGGAGGAGT  | GAATGGAAAAAGCAGTGAGGAG  | GCTGAAGCTACAAGTTC  | 40 | 0.5 | GCTGAAGCAACAAGTTC  | 40 | 0.5 |
| RS2CL5411s | GGGCAGAACTGGTGTCTGTAA   | CAACAAACACAAGTTGGAAGC   | ACCAGAAGAAGCAGCAG  | 50 | 0.5 | ACCAGAAGCAGCAGCAG  | 50 | 0.5 |
| RS2CL5524s | AGCAAGCAAACCTCCCAAACCTA | GAAGCCTTCCCACAAAACAGAG  | TCGAGGTTACTCCTCCT  | 50 | 0.5 | TCGAGGTTACCTCCTT   | 50 | 0.5 |
| RS2CL5831s | TCCAAACCCATCAAGACAAGTG  | AACGTACCCGAAACTGTGCTTT  | TTTGCTCGAGCCAAGCT  | 50 | 0.5 | TTGCTCGGGCCAAGCT   | 50 | 0.5 |
| RS2CL6133s | CGAACTGAATCAGCATCAAAGG  | GGAGCCCTTTTACCTCATCAA   | CGGACACGTGCTAGACG  | 45 | 0.5 | CGGGCACGGGCTAGACG  | 45 | 0.5 |
| RS2CL6161s | GCTTGACAAGGTTACATGCTGA  | AAGAGCAAGTTAGCGGTGTTCA  | CACGAGGCGTTTGTATG  | 50 | 0.5 | CACGAGGCTTTTGTATG  | 50 | 0.5 |
| RS2CL6191s | TAGGATTGGCTGGTCAACAAGA  | ACCATGGTTGGTTTGTCAACTG  | GTTTCAACTAACCAACC  | 40 | 0.5 | GTTTCAACCAACCAACC  | 40 | 0.5 |
| RS2CL6239s | TTTGTCCAGATGGATGAAGTGG  | GTGCGCAAAAAGAATTGGTGAC  | TTCACTAAAAAGTCGCC  | 40 | 0.5 | TTCACTAAGAAGTCGCC  | 40 | 0.5 |
| RS2CL6266s | ATAATCTGCGACGAGAAGCTGA  | GGAGAAACGATGCATCAAAGAG  | TTCAAATTATCTTTGTT  | 35 | 0.5 | TTCAAATTTCTTTGTT   | 35 | 0.5 |
| RS2CL6287s | TGTGGTTCAGATCGGTCTGTTT  | CCTCCAGTGACATTGGTTCAAG  | CGATGTTGAGAGGTTTA  | 40 | 0.5 | CGATGTTGCGAGGTTTA  | 40 | 0.5 |
| RS2CL6294s | TTGCAAACGCTCTTCTCTATCG  | ACCCTCGTGCTAGTCACATGAA  | AGAATATTCTGACATCT  | 35 | 0.5 | AGAATCTCCGACACCT   | 35 | 0.5 |
| RS2CL6354s | CAGAAGCCTTTCTTCCACCTA   | TTACAATGCCTTAAACCGCTGTG | CTTCTTGATTTGAAAAC  | 45 | 0.5 | CTTCTTGACTTGAAAAC  | 45 | 0.5 |
| RS2CL6683s | GAAGAAAGTCGAAATGCGTGTG  | GATTCCACGCAAACCTCTCAATG | GGAGACTGAGGAGGGTG  | 45 | 0.5 | GGAGACTGGGGAGAGTG  | 45 | 0.5 |
| RS2CL6931s | AGCATTCCCAACAGGAGGATTA  | GAATTTCCCGACTCAATGTCAG  | TTCACATGCCACAAAAA  | 45 | 0.5 | TTCACATGGCACAAAAA  | 45 | 0.5 |
| RS2CL7090s | AAAAGGGCAGGCTTGAGAACTT  | ACACACAAAAGCAGGCCAGATA  | TTTGTATTTTACTATTA  | 45 | 0.5 | TTTGTATTACTATTA    | 45 | 0.5 |

|            |                        |                        |                   |    |     |                   |    |     |
|------------|------------------------|------------------------|-------------------|----|-----|-------------------|----|-----|
| RS2CL7544s | CGGGTTTGATGGTTCACCTAAT | ACTGCAAAAAGACAGCACGAAG | TTTTATGAGATAGTGTT | 35 | 0.5 | TTTTATGACATAGTTAT | 35 | 0.5 |
| RS2CL8063s | CTTCTCCGGATCTTCCTTTTCA | CATGGGGCTTATTCACCAATAC | TGGTTGTGGGATGACAG | 45 | 0.5 | TGGTTGTGAGATGACAG | 45 | 0.5 |
| RS2CL8102s | AGGTCTCCCTCGCCTTAAAAAC | GATGCAAGAAGTGAGCAGGAAA | GGGAGCTTCGCGAGGAA | 50 | 0.5 | GGGAGCTTTGCGAGGAA | 50 | 0.5 |
| RS2CL8104s | TACGAGACGAAATGGGATCTGA | CTGGGTCCATAAACGCAGAGAT | CTAGCCATAGGGCTCGT | 50 | 0.1 | CTAGCCATCGGGCTCGT | 50 | 0.1 |
| RS2CL8169s | ATTGTGGAGGTGATGATCCAGA | CAAGGCCAAGCCATTCTTTAAC | GAGCTCGGTAATCGGGT | 35 | 0.5 | GAGCTCGGCAATCAGGT | 35 | 0.5 |
| RS2CL8214s | GCCAGGATATCAAATCGGCTTA | TCCTACGTAACACGAACCAAGC | CGATCTGTCTACGATCG | 40 | 0.5 | CGATCTGTATACGATCG | 40 | 0.5 |
| RS2CL8380s | CTGAACTGGCATCTTCACTTGG | GGCTTATCACCTTGCTTGATTG | CGTGAAAATTTGGTGTA | 40 | 0.5 | CGTGAAAAGTTGGTGTA | 40 | 0.5 |
| RS2CL8395s | ACGAACTCAGGACAGAGCAACA | AAACTAAACCGCCTGAAACC   | TCCAACCGCTAAACTCT | 45 | 0.5 | TCCAACCGTAAACTCT  | 45 | 0.5 |
| RS2CL8405s | CACTTTCGAGGTGGAGATGATG | TATCTGCATTCTCCGGTAGTCC | GATGGACATGACTCTGC | 35 | 0.5 | GATGCACAGGACTCTGC | 45 | 0.5 |
| RS2CL8540s | TGGTGGTACATCTCTGGCTAC  | TAAGCAACGCCATGAACTGAC  | GCTGACGTCGGCGTAGC | 55 | 0.5 | GCTGACGTTGGCGTAGC | 55 | 0.5 |
| RS2CL8726s | GAAAGAGCCGTTGAAGAACCTG | TGTTGCTGTGTGTTTCCTCCT  | CTGTGTAAGTGTCTTCT | 40 | 0.5 | CTGTGTAAGTGTCTTCT | 40 | 0.5 |
| RS2CL8976s | TTAGAGGACGGATGTACCACGA | ACATAACGCAGTCTCTGCTCCA | GGGGTTATTATATATGT | 35 | 1   | GGGGTTATATTATATAT | 35 | 1   |
| RS2CL966s  | CCGACTTCTTCATCGACACATC | TCACCAAGACTATGGGCGTATG | CCAGCCGCGGAAACAAG | 50 | 0.5 | CTAGCCGCTGTAACAAG | 50 | 0.5 |
| RS2CL996s  | GTTTTATGCCCTTTGCTCCAC  | TTGGTGGGATTCTCACTTCCTT | CGCAGCGCTTTGTTTAT | 55 | 0.5 | CGCAGCGCCTTGTTTAT | 55 | 0.5 |

Table S12 List of RGB PCR-RFLP markers

| Marker loci | Restriction Enzyme | forwerd primer sequence(5'→3') | reverse primer sequence(5'→3') |
|-------------|--------------------|--------------------------------|--------------------------------|
| RGB10057c   | XbaI               | GACTGATCCGAAC TTGTTAGACATT     | ACAGTACCCACAAGATCAAGACTTC      |
| RGB10350c   | PstI               | CGAGCTGTGAAATGATAGAGGTATT      | CAGCTTCTTACGTTTCAGATCATT       |
| RGB10737c   | HindIII            | GGAAAAC TCTAACATGAGTCCAAGA     | GATGATAACGATGACGATTGTTGTA      |
| RGB10851c   | HindIII            | AGCTTTAATTAGTTCCCTCTTCCT       | GACAAAGACAAGGCATCTATGTTCT      |
| RGB10862c   | EcoRI              | GTATATGATGCTCAAAAGCCACATT      | AATCTAATTCCCGAGAGACAAAGTC      |
| RGB1089c    | HindIII            | ATGTA CTGAGGAAAATGCTGTAAG      | CGGCTGCACATATTATAAAATTAAGG     |
| RGB10934c   | EcoRI              | ACTCCCCTGATATTTTCTTCTTCAC      | CTCGAGGTAATGACTCTTAGCAGTG      |
| RGB10948c   | XbaI               | GGATTTATATCCGCTTAGTCCATT       | CATGTACTACAAGATCAACGTCTGC      |
| RGB11029c   | EcoRI              | GAATTGGTGAGTCTCTGAGATTTGT      | CCCTACTTTTACATCACTGAACACG      |
| RGB11177c   | PstI               | TAATACCTTAGGAGATCCACCATCA      | AGTCTAGACAAATGCTTGGGAGAAG      |
| RGB11249c   | EcoRI              | GGTTCTAGTTCAGGTTTGTGTTACG      | ACTGTGGCTAGAAAAGAAAACAGCTA     |
| RGB1137c    | XhoI               | GCTTCGTCAAAGTTAGGAATTTACA      | ACAAGTCAAAGTACCATCCAAGATT      |
| RGB11843c   | XbaI               | GGAGAAAAGAAAATAACCGAAGT        | TTAGTTCACCTTGTATTCGGTTGTT      |
| RGB12060c   | SalI               | AAGACTCTGTCTTTGACCTCAGCTA      | ACTGGTTATCGTTCATTCTCACATT      |
| RGB12172c   | XbaI               | AACAGGTTCTTGAAGAGAAGAATCA      | ATAAACCCTCAGACTCCAGATAGC       |
| RGB12188c   | HindIII            | CAGAAAAGAAATGTCACGAATCATC      | AATCTTGCTCTTTATCGGTCCATAC      |
| RGB12209c   | PstI               | AACTCCGAAGCAGTACTCTCTAACA      | ACCGAGGTCTAATAGCTTTGTTTTT      |
| RGB12346c   | SacI               | AAAAGGATAAGAGGGCAGAAGATAA      | ATGCGCATCTGTAAGTAGTCTAAGC      |
| RGB1253c    | EcoRI              | TTTGGAGTTAGCTTGAGATGTTTTC      | AGCCTTCTCGGATATGCTTACTACT      |
| RGB12822c   | EcoRI              | TGATCAGTTCAGAGCTTAGTGTTGA      | GTTTCTGATCACGTTTGACCTACTC      |
| RGB12858c   | EcoRI              | GAGAGAGTGGGAATCACATTGTA        | CTTATTGATTACCACCGGTATAAC       |
| RGB13054c   | SacI               | TCACGGCAAAC TAACCTAATACCTA     | CGAGTCGTAGTTCGACTTCTATC        |
| RGB1306c    | XbaI               | GAGATCGTTAACCAATCATCTTCC       | CAGTTTCTAGGTTTAACTTCCCTA       |
| RGB13975c   | EcoRI              | GTTTTTGTGCAATAAGTCAAGATG       | AGTCCAATCATGTAAGGCAAACATAA     |
| RGB1399c    | HindIII            | TCACGGGTCTTTTTGTTCTTATTAC      | TCATTTAAAGACCTCCTCTAAACA       |
| RGB14019c   | EcoRI              | AAGGTAGAAGACGATGTGATTCTTG      | ATGTTGACATCAAGAGGACACTACC      |
| RGB14399c   | HindIII            | CGTAAAGTCTGATTCCCTACAGCTC      | AATTGGTGTTGATATGTGTCACCTG      |
| RGB1443c    | EcoRI              | CTAGTTTGAGTTTGCCTCAGAGAG       | TTATTGGCTATTTCTGTTTAGCTTTG     |
| RGB14459c   | PstI               | CCCAAAATTAGCATAGAGATAGCTG      | GGAGAAGGTGAAGTTTTTGGATAAT      |
| RGB14649c   | EcoRI              | GCAGAGAAAAC TATAGTGGTGTGGT     | GGGCTTGGATAGATTGGAATATAAA      |
| RGB15203c   | EcoRI              | CATGATGGTTCAGTCCATATGTTTA      | CATCACCATCTATAGCATCAATGTC      |
| RGB15272c   | XbaI               | CTAAGCCAAC TAAATGCTTTTCAAG     | CAGATTTGCTAAATTCCTGCTAC        |
| RGB15964c   | EcoRI              | GTCAAATTTGGGTTGAATAGAAGTG      | CGTTTTTATGACTGTTGTGTGTGAG      |
| RGB16366c   | HindIII            | TAAAGGTTATTAGGATTTGCGAGGA      | CTCGATTACTAGACGAACTCGAAGA      |
| RGB16666c   | HindIII            | CTACTCAACAATCTCTTGCTCAGT       | AGGAGAAGATGAGGGTAGTGAAGAT      |
| RGB16843c   | EcoRI              | TACTTCTGAACAGACAAAACAATCCA     | CAAAACTCAAACACGAAAAGAGGA       |
| RGB17458c   | HindIII            | TATCTAAAGGAACGATAGCGACAAC      | GATCCTAAACACAGGGACTAAAACC      |
| RGB17888c   | EcoRI              | CAATCATGTGTTTCAAGAAGTTCAA      | CAGCCAACAAAAC TAAACATCTCT      |
| RGB17905c   | HindIII            | ATCTATTCGATTTTTGCAGTTCAG       | GTTGATAAATGACGAGGAAAGACAT      |
| RGB18830c   | XbaI               | ATCGATATCAATAGGGAAACGAAAC      | ATTAGATTTGTGATAGCGTGTGTGA      |
| RGB19108c   | EcoRI              | TAATCTAAGGGGCGAGTTTGTAGTCT     | TCCCTACAGTTTATTTCCCTAAACC      |
| RGB19113c   | EcoRI              | CTTACCGTGTGGTTAGATTTGTACC      | CATCTTACCAAACCATTAGCTGTTC      |
| RGB19481c   | XhoI               | TCTTATAATATTGCAAGCCAAGACC      | AGGAGAAGAAGAAGAAAGGAAACAG      |
| RGB1952c    | EcoRI              | CGGTATCAATATCTCATTGATGCTT      | GTCTGAAAGAAGGCAAATCTTTGAT      |
| RGB19618c   | PstI               | GTATCAAAGAAAGAAGGAGGAGGAG      | TCCAGCTATAGCGAACAGATAGTTT      |
| RGB2012c    | PstI               | GAATCATCAAAGACTCGTATCCATCT     | TTCTTCTTTCAAAGTACGACCCACT      |
| RGB2029c    | HindIII            | GTGCAATTGATGTTGTCTATTTGGT      | AGAGTCTTGTGTTGGATCACCCTT       |
| RGB2123c    | EcoRI              | GTGTTTTCGGAAGTTATGTTATTG       | AACAGTGCTAAGGAGATTGAACTTG      |
| RGB21440c   | SacI               | CCCACCTCTAAAATCTAACCTTTC       | AACCTTTCGATGTGTAGTACCTCGTC     |

|           |         |                            |                             |
|-----------|---------|----------------------------|-----------------------------|
| RGB21550c | EcoRI   | TAATTAACCGTTGTAAAGGAACACG  | GATCTCGCGAATGATTAAC TAGAAG  |
| RGB2163c  | HindIII | CGACCTATTTCTACCTTCTTCTCC   | TGAAATCGAAGTCATAGACAGCATA   |
| RGB24589c | BamH I  | CCAGAAAGGTTGT CACAAGTAGAAT | CCTGACCAGTAATTGAAGAACTGT    |
| RGB25198c | HindIII | GATCTCCGCTTTTTACTTTACTTCC  | ATGTTGACCTAATTGTGGAAGTGT    |
| RGB2543c  | PstI    | TCAGCAACTAGTCTCTTCTCCTGAT  | GGTGTGGGTATGTGTTAATTTTGAT   |
| RGB25459c | HindIII | AGAGATTTTGTATACCCCGAAATGT  | TATGTTCTGATCACATGTGCTTCTT   |
| RGB2659c  | HindIII | TCTGTTATGGGAATTCTTGTGTTC   | ATCTTGAGACAAAGTTAGATGTCCG   |
| RGB2673c  | EcoRI   | AGTAAACTCATTACGTGGAAACCA   | GGGTCTCATAACTGTGTGTCTGTTT   |
| RGB2724c  | EcoRI   | AGTATAAGCAGGAGAAGGTGAGGAT  | CAGAGTCTGAATCAGTAGCATTCT    |
| RGB2773c  | HindIII | TACGGGTAAGGCTGTATTTAGGTTT  | ACGGTACTGTATAACTTGACGAAGC   |
| RGB28103c | HindIII | GGTTGTGAGTATAAGTTCACGCTCT  | TCTTGAGATACTTTTGCATCATCAC   |
| RGB2849c  | EcoRI   | CCTGTTCATAAATCAGGAAGAGACT  | CTACAGCTTTGTCGGTTACATACGA   |
| RGB28864c | XbaI    | TGGAGAGGAGTATAAATGGGTACAA  | CTGTTGGGACTTGGTTTAACTTCTA   |
| RGB2900c  | SacI    | CTCTATGCATTGGCGTTATTTTAGT  | CTGAGTCTGTATATGTCTCCGGATT   |
| RGB299c   | XbaI    | CTTTGGATTCTTCTTCTTCTCTCC   | GCTGTTGTTGAGGTAGAGGTACTGT   |
| RGB3040c  | PstI    | TCTGTTTCTGAGACTCCATGAECTT  | TCATTCACAATCCCTAGTTTCTCTC   |
| RGB3124c  | EcoRI   | TTTACTACAAAACACTGCGTCACAT  | CCACAGTTTATATCCTTTTTGCTTG   |
| RGB3215c  | EcoRI   | TCCAAAGTAAGACCAAAAGAGACAC  | TATGTAGATGGGATATGTTTCTGCT   |
| RGB3288c  | HindIII | CTGATAACCAGATCACAGGAGAGAT  | ATGTCTATGAAGGAGAGTGATTTGG   |
| RGB3655c  | EcoRI   | GAATCGGCCTATTAGTTGTGAATAA  | TGCGTAAAGTCAGAAAGCTGTAECT   |
| RGB3739c  | EcoRI   | CAGAAATTCATCGATATTGCTCTCT  | GTTACAGCTGGATCTTAGGAGGATT   |
| RGB3765c  | HindIII | CCAGATCCATTAGATGTTTCGACTA  | TCTCCAAC TTTGTGTAGTTTCGATT  |
| RGB37c    | EcoRI   | TTGATGGTTTAAAGTGAAGTCCTA   | AATGTGAGGGTTGAACTTGTTAATG   |
| RGB3806c  | HindIII | AACGAGAACTAATTCAATGATCTGC  | GTCTCAGAAGAGTGGAACCATAAAA   |
| RGB4147c  | EcoRI   | CAGGATAATCATCATTTCCAGTTTC  | AGACCAGCTCAGCTATAATCAGTTC   |
| RGB4153c  | PstI    | CTACAATGCTTAGGCAAGAAGAGAG  | AAGCAGAGTGAGTGAGACCTCTAAA   |
| RGB419c   | SacI    | GATTTTTCGCTTACTCTCCAGCTAC  | TGCTTGTAATGACTTAGCCTTCTCT   |
| RGB4201c  | BamH I  | TGTTGTCAAGTACGTA AACGATG   | TAAAAC T CACACTCCAGAAGGATTC |
| RGB4595c  | XbaI    | AGAGAAGAATCAAGAAGGAGCTTTT  | TTGGTCTCATT TTTCTCCTGTTTTAG |
| RGB4736c  | EcoRI   | GATCATGTAGACAATCAAAACACCA  | GTCTCTGCTCAATTTTAAAGGTCAA   |
| RGB4922c  | EcoRI   | GTATTACTATCAGGGGAGGCAAGTT  | GTGTAGAGCATTGCTGCTCTCTTAT   |
| RGB500c   | XbaI    | GATGCCTGTCCATTTACTCACTATC  | CTGAAGATGGAGATCACTTCAAAAAC  |
| RGB520c   | EcoRI   | CTCTCCTTGAAGTAAGTGTAAACGA  | GTGTCTTCTAACTGTGATCTCACG    |
| RGB5240c  | EcoRI   | TAATACCTTGAAGACGCGAATAAGA  | ATTTAGGTTTTGGATGGCGTATTAG   |
| RGB5484c  | HindIII | ATTCATAAACTCCAAGTCGCTGCTA  | AAATATCTCCTACGTACACGCACAA   |
| RGB5491c  | EcoRI   | CACCTTCATCCTTTTATAACAAAAC  | CGGAAGAGATGAGTCAGAACTTAAA   |
| RGB5549c  | SacI    | AGTTTCTCTGCTGGGTAATAGAACA  | TTTGTGGATATGTTTTGTAGGGACT   |
| RGB5639c  | SacI    | GTTCATAAGCCTAAGTGTGACTGGT  | GTTTCGAACCCCTTTATCAATCTAT   |
| RGB5705c  | EcoRI   | CTCCGTTTAAAGTGTACACAGTAGT  | GAAACTTAAAACCAAGCTCTGTTGC   |
| RGB5729c  | EcoRI   | ATATGACCACACACGTTTTAGATGA  | CAATACCTCTCTGTCTCTCTCCA     |
| RGB6149c  | HindIII | TGTACCGTTCTACAGATAAAGGAG   | CTGTCTGCAAAGATACAAAGAAACA   |
| RGB645c   | EcoRI   | ATGGGAGAGAGAGAGTGGTACTTTT  | GGGAGTAAAGTTACAGAACGAAGGT   |
| RGB6475c  | HindIII | ACTTCGAATTTGCAGTCTCTTTTCT  | AATAAGTCAAGTAGCCGATTGGTTC   |
| RGB6680c  | EcoRI   | TCAACAAGTGAATAATGAAGCTCT   | ACAGTCTTCATCAGGTTAGCATTTG   |
| RGB7078c  | EcoRI   | CTTTTGTGCTAGAGGGAAGGTTATT  | ATAAACTTTTCTGTCACGCTGAATTAG |
| RGB716c   | HindIII | TCCTTTGGAATTGACTTGACAATAG  | ATTACCAGAGAGGAAATCCGTAGAC   |
| RGB7310c  | EcoRI   | AGCCTATCAAGCCCAACTAGTATCT  | GGATCGGATTCCTACTCTGTTAAT    |
| RGB7653c  | EcoRI   | CTAAGTATAAGCAAGCGACATTGGT  | ACGTAGATGGTGTAAAAACAAGCTC   |
| RGB7818c  | EcoRI   | TACCTTGAATGGAGTTAGCTTTGAC  | TCGAAACTTGTAGGAAAGAGAGAGA   |
| RGB7858c  | HindIII | ATGTAGGGCTGTATCATGCTATTC   | GATATGCTTTGCATTTCATCTTAGGT  |
| RGB7901c  | BamH I  | AGAGAAGAAGATGACACCAGTCAAG  | AAGAAACCCTAGTCGATTTCTGGAG   |

|          |         |                            |                             |
|----------|---------|----------------------------|-----------------------------|
| RGB8057c | HindIII | AACAGATCGCCTACATAATCAGAAG  | AAGAGAGAAGAGGTAGATCGCTAGG   |
| RGB8387c | HindIII | AGAAGTGTATAGGGCAAAACATGAG  | ACGCATAGAAGAATGATTTAGGTTG   |
| RGB8501c | XhoI    | TTAGGGCTAAAAGTATCAACAATCG  | GAGATTTTGGTGAAAGGGTTTTTATG  |
| RGB8510c | EcoRI   | CAGTAACAAGCAAACACCTAATCCT  | CCCCTTTGATGACTTAATTCTCTCT   |
| RGB8542c | HindIII | TTCCCTCAACGTAATGTTTCATATCC | GAGGGTTTCCACAGACTATGATGTA   |
| RGB8990c | XhoI    | AATAAACCCCTCCTCTTATCACTA   | GTTTCATAGATTTCGCTAAAGCAAAAG |
| RGB8994c | HindIII | AACTTAAATGCAAAAAGACCTCACC  | CTTTTCGATCAGTTCAAGAACAAGAC  |
| RGB90c   | HindIII | AAAGAGTGAGAGAATGGAACACTCA  | TCCTTTCCCTGAAAGAGTAAAACCT   |
| RGB921c  | HindIII | ACGCATATACGCACCAATCTATATC  | ACTCACGTAGAGAACACAGGAGAAC   |
| RGB9500c | EcoRI   | GTAAAAACGTCATTAACGCAGACA   | AAGAAAAAGAACGTTAACACACGAC   |
| RGB964c  | HindIII | ACTGTAGACAGTCGTTGAAGTCGTC  | CTTCTTGGCCCGTCTATTATTATTT   |
| RGB966c  | PstI    | CAGTTGGTACTGTTTAAGACGAACA  | ACGTCAACAGAAAAATCAGAGAAAC   |
| RGB9670c | HindIII | GGTCCCATATCTTCTCCTTGTAAC   | CTGTCAAGAAAGAAGGCTTGAGTAA   |
| RGB9734c | EcoRI   | CCGGACATGTTGAAGAATTAATAGA  | TCAAAGTGACGAAGAAAAAGTTGAC   |
| RGB9877c | HindIII | TTCGACATCTGCGACTCAAG       | AGGCATCGCTGAATACCAA         |
| RGB9971c | HindIII | CAATGTGCTATCTTACTTTTCGCTT  | AAACTAGGTTAGAGGAGTCGAGGAA   |

---

Table S13 List of RGC PCR-RFLP markers.

| Marker loci | Restriction Enzyme | forward primer sequence (5'→3') | reverse primer sequence (5'→3') |
|-------------|--------------------|---------------------------------|---------------------------------|
| RGC1000c    | EcoRI              | AGAGAGAGAAAGATGATGAATGGTG       | ATCAACACAATTGTCATGTGTTAGG       |
| RGC10051c   | HindIII            | TTAGAAGAATACAGCTGGCAAAAAC       | CTAAAGAGGTTAGCAGAAACCATCC       |
| RGC10056c   | EcoRI              | GGCTCGTATTAAGAAGATTATGCAA       | GGTGTAGGACACAGTCAATATAGGG       |
| RGC10060c   | EcoRI              | CTCCTCATCTTATCTCCTTCCTCTG       | ATTACGCAATTACGTGCTTAGAGAC       |
| RGC10094c   | HindIII            | GTATACTTGTATCCCAAATCCACCA       | CTAAACCGAAAGAGACACCACTAAA       |
| RGC10110c   | EcoRI              | GGAATCATGTATGCCTTCTTCTCTA       | CACCTAAAAGCTAACTCATGAATGG       |
| RGC10301c   | EcoRI              | GTTTGTAACGTTTGTTGAGAATGGT       | AAATTGATGGATAGGAGTCGTAGGT       |
| RGC10310c   | EcoRI              | TAAGTTTGCTGAATAGTGAACACA        | AAGAAAATGAGAACTGTCACCTGAA       |
| RGC10321c   | HindIII            | TAGACAGATTGATGGTCAACTCAA        | GATACGCGACTTTTGTCTGAAGTAT       |
| RGC10385c   | HindIII            | CCAACTGGAGATGCTAAATTATGAG       | GTGGCAGGCTACATCAGATTTTACT       |
| RGC10400c   | HindIII            | CCAGTTGATCCAAGTGTAGTTATCC       | TCCAACCTATATATGCTTTGCAAGT       |
| RGC1041c    | HindIII            | ATTGCTCATCACACAAGATGACTTA       | GCTTTGTTGCCATACTTTGTCTACT       |
| RGC10518c   | EcoRI              | GAAAGAAGTGTCAAGGGTAGAATCA       | GGACACTAGCAGCGTATGAGATATT       |
| RGC1052c    | HindIII            | GCATTTTTGTCTCTGTTAGATGAGC       | CACTCGTTAAGTTTTCTTGAGCTTC       |
| RGC10531c   | HindIII            | ATGGAGTGTGGAGGATAGATGATAA       | TCAAAACACGTTGAGACTTGAGATA       |
| RGC10544c   | HindIII            | AGGAGAATACCGTCTAAAGAGAAA        | TAGTCAGATACTGTTGTTGGGAGT        |
| RGC10583c   | EcoRI              | TACTTGAGGAAAATTGCTGGTAAAG       | CTAAGCTGATACACCATCTTGCTT        |
| RGC1058c    | HindIII            | CGTGTAAGTTTGATTCTTTCTACCG       | CTGTAATCTTAGGCTGCACATCTT        |
| RGC10645c   | EcoRI              | CCATTATACAACCTCACATCATTCCA      | AAGTAAGGGAATCCAAGAAGAGAAA       |
| RGC10740c   | HindIII            | ATTAACCTAGTTTGCCTCTCTTTGC       | TAAAGAGAAAGAGTTGATTGCCGTA       |
| RGC107c     | EcoRI              | AATGAATAAGCATGGAAGGCTAATC       | ATATCAAGCCGTTCTTGAAAATCTG       |
| RGC10800c   | HindIII            | AACCATTGTCTCACCTAATAGACCA       | ACAACACTGCTAGCTGCAATAATAA       |
| RGC10825c   | EcoRI              | AGACAATGTTATTCGTCAGAGAAG        | TGTGAGGGAGTAATTTCTTTGCTAC       |
| RGC10838c   | EcoRI              | AGTTCAGTCTATTTGACAGACCAG        | GATTGTGAGATTTTGAAGGTTCTC        |
| RGC10842c   | EcoRI              | TTATTGTCAGGAAGAGGAGAGTTTG       | GTTTTTACCATGGATGCTTGATTAG       |
| RGC10902c   | SacI               | TGGACGTGGTTGTAGTTGTAGTAGA       | CAGTCTGAATCTATCATCGTTGTTG       |
| RGC10939c   | HindIII            | TAGCTTGAACCTGGTTGATATGGTT       | TCAAAAAGATTGCTAGGAGCTAAGA       |
| RGC10969c   | HindIII            | TTTGTTTTTGGGAATTAGTCTGGT        | TAAGCAGTAGACCATCTCCTTTTCA       |
| RGC11016c   | EcoRI              | ATAGAACTCACGCGTCTTCATAAC        | CAAGACATACACAAGGAGTCTGATG       |
| RGC11044c   | EcoRI              | GTCATGGAATGTAGAGTCACCATCT       | AACCTGCATTATTGTTGTCTCCTAA       |
| RGC1110c    | HindIII            | TCCTCCAGACAAAAGAAGACTGTATC      | TATCATCACACGGTTAAGATTTGTG       |
| RGC1111c    | EcoRI              | TATTACTCTGTTTCCAGAAATGGGAAGC    | CGAATCTCTGAAGTATCAATCAGGT       |
| RGC1115c    | HindIII            | GAAGTCACCTGTGGAAGTAAAAGAA       | TCCAAAATGATAGAAGGGTAAAAGG       |
| RGC11199c   | HindIII            | AGACTCAGTTACAGCAGGTGAAAAC       | ACAGTCAAACAAAATAGGGTCACAT       |
| RGC1119c    | HindIII            | TAGCAACTGCAATACCAACTATCTG       | TTTCAAAGGGTAAAAGTCTCTCTCA       |
| RGC1124c    | EcoRI              | ATCATTTAGTTTGAGGACAAACAC        | CTGAAACCAGCTATCCAAAAGTTTA       |
| RGC11312c   | EcoRI              | GCACTGCACTATCAGTTTCTCTTTT       | AAGTTGAAGCGTATTGTAACTCAGC       |
| RGC11328c   | EcoRI              | CAAAGCTGACAAGAAGAGAATCAAT       | GAACCTTGCTTCCCTGTTGAGAATAA      |
| RGC11372c   | HindIII            | TGTTAACCTGTTTGGAGAGATAAGC       | TTGCAAGATACCCTTTGATAGTTGT       |
| RGC11405c   | HindIII            | TGATATTATCCCAGGATTCCTTCTT       | CAGTAACTGGAATGGATCTTTTG         |
| RGC11410c   | HindIII            | CTTGGATGTAACCTATCCTTGCTAA       | CGTTGCTAGTGTCTAATTGGAGTT        |
| RGC11438c   | EcoRI              | AAGATGAGAAAGAAGAGAGCAATGA       | GATTGAGCAGGTGAGACAAATAAAG       |
| RGC11447c   | PstI               | AGCATGTACTAAAAGGAGTGACCTG       | TTGAGCATGTCTATGATCTGAAGAG       |
| RGC1147c    | EcoRI              | ACTATCATCCCCAAGTTTTGTATT        | ATTGGAGTTGAGTACGAACCAGTAG       |
| RGC11501c   | HindIII            | AGCACAAGTGGTATTAAGCAAAAAG       | GCGGCATACTCTACTAATCTTCAA        |
| RGC11504c   | HindIII            | TGATTTTCTTCCATGCTTCCTATTC       | TGATTTAGCAATTCGGACTGTCATA       |
| RGC11533c   | EcoRI              | TTTAGGGCATTATGGTAATCTGATG       | ACTAAACCGAATGGAACAGAGTTTT       |
| RGC11618c   | HindIII            | TCAGCAGATCTTCTTCATTCTCTTT       | CAGAGTCTCTAAGGTGAGACAGGAG       |
| RGC1165c    | EcoRI              | TGGTACTTGGTTTGTTCCTATGTT        | GTCACGGTTACCTTCTTTAGCTGTA       |

|           |         |                            |                            |
|-----------|---------|----------------------------|----------------------------|
| RGC11660c | HindIII | CACTGAAGACAACAATTTTGTAACG  | AAGAAGAAGACGAAATGCTGAGTCT  |
| RGC11673c | HindIII | ATTTTATGTCTATCTTCGGTGGTCA  | CATAGAATCAGCAAACCTTCATCCTT |
| RGC1167c  | EcoRI   | ACTCTCTTTTTTCATGATTGTCACCT | CGGGTATTAACAAACTTAGATTCTG  |
| RGC11743c | EcoRI   | ATGTGACACTCATCAAGTCATCATC  | TCGAACTCCCATTTTACATAGTCAT  |
| RGC11789c | EcoRI   | GTTTAAAGTGTTAAATGACGCGACT  | ATAAAAGCACAGAGCATGTCGTTAT  |
| RGC11798c | HindIII | TGTGATACAAAATCTTCCTCCTAGC  | AGAGATCCTTGACTGACATTCCTCT  |
| RGC11816c | EcoRI   | CATGGTGAGTGATACTGAGAGGAAT  | TGAAGAAAACCTCTATTTGCCACATC |
| RGC11873c | PstI    | TATCTTGGTGTCTCAGAGAGTGATG  | CATAGGGTACGTAAAAGACCAAGAA  |
| RGC11890c | EcoRI   | AGATCACAGTGTACAACAACAATGC  | TATTGATAAAAGTAACCCCGACTCC  |
| RGC11896c | XbaI    | TTCTTTCTTTCCAGATGACGTAGAT  | TCCTTCTCCTCTAACTCTTTCACTC  |
| RGC11904c | SacI    | GACGCTCTCCATAAGTGATAGAA    | ACAGAACCTCAAGAAGACCCTAGAT  |
| RGC11938c | HindIII | GACCAAGAACCTTGAGTCTACTGAGC | TCCAACGCATTATAAGTAACCTTGT  |
| RGC1195c  | HindIII | TCTCTTGAATGATCTCACCGAGTAT  | GTGTTTCTTAAGGTTGAGAATGTGG  |
| RGC11985c | EcoRI   | TTATACTTAAGGTATCCGCACACG   | CAAGTGCAAGCTGTGTTAATAGTGA  |
| RGC12020c | SacI    | GTGTACAACGACATTTTCTGCATAG  | CAGAGATGTTCTTTCTCTCCAAAAG  |
| RGC12097c | HindIII | GTCTCTTTATCATTTCTCGCTCCTC  | CGCTAAATCTGCTTCTACTTTGTTC  |
| RGC12111c | HindIII | TACAGAGGAAACAAGAGGAAACAAG  | GTGTAGAAACAAGACAAGAGGTTCCG |
| RGC12174c | EcoRI   | TCATCACAAAAGTCATCATCAGAGT  | GCTGGATCAACTTGCTTAGTAGAAG  |
| RGC12178c | EcoRI   | GCTTGTTCTGTTCTTTCTCTGAATC  | AAGAAAACAGAGTGCCATTGACTAC  |
| RGC12216c | EcoRI   | ACAAGACGCCAAAGAGTTTAACATA  | ACCTAGTCATGGCCTTTTAGTTACC  |
| RGC12230c | HindIII | CTTCAAGACCGTTGAACTTAAAGAA  | AGAGAAAAGTAAGATGAGTGCCAGTG |
| RGC12272c | XbaI    | AGTGAACACGAGTCGTAACAAGT    | ATAGAGAGAGAGGGAGAGGATACCG  |
| RGC12310c | EcoRI   | ATGTGTGGTGTGTTGTGTAGGTTTTA | TTCCAAGAACGATGACTGTAGTGTA  |
| RGC12323c | SacI    | TCGCTCTAGAGAAAGGTAAACAAAA  | CCCTCTTCAGTAAACAGAAAATCAA  |
| RGC1234c  | EcoRI   | AACTGAACCAACTTTACAGAACCAG  | AACCTATGATGTCAAATTCGTATGC  |
| RGC12354c | HindIII | AGGAGGGTGAGTTTTTCTTTCTAA   | AGTCCCGGCATTAGTTTATATTCTC  |
| RGC12381c | HindIII | GTATCAGAAGTCTTCCCCCAAATAG  | ATTTCTACAGGAACGAGTCTTCTCA  |
| RGC12389c | EcoRI   | GTTTAATTGAAAATAACCGACGTG   | TCACTAACTCAAGTCAGACGAATCA  |
| RGC12399c | EcoRI   | CCGTCTGTTGGTCTAGTACTGTTTT  | TTAGTATTTAGGGGCCAATGTTGT   |
| RGC1244c  | XbaI    | TCCTTGAAGAAGCTTAGTGTTCTGT  | TTGCAATGACTTTTGAGATAGACTG  |
| RGC12486c | HindIII | TCTACAAGTTTAAAGCTCGGTTTCAG | GTTTCGATTGCAGAGACTAATTTGAT |
| RGC12560c | HindIII | AGTTCAGCGAGTATAATGAGTCTGC  | TCACTTGTCCCTGTATCTGGAGTTT  |
| RGC12573c | EcoRI   | AGTGAGGAAACAAAGACGTGTTAAA  | GCTTGTTTGGAAATCGAAATTAGTCA |
| RGC12577c | HindIII | TCCGGAGGAAGAGTATTAGAAGATT  | ACATCTACACCCAAATTGTTCCAGAT |
| RGC12603c | HindIII | TAATGCTAAGCCTCGAATGATTATG  | GCTTGATCTCTCGACTAACTCTTTG  |
| RGC12639c | HindIII | TTTCGTTGGATATGCTTGTTAGTTC  | ACTGCTGCTTTTATCTCATTGTTTC  |
| RGC12711c | HindIII | GTTCCGGTTTACAGATTACCCTATC  | AAGGATCCATCCAATTCAGTCATTA  |
| RGC12721c | EcoRI   | GGATTCAAATCAATACAGCCACTAA  | GTTTGATGTTTGGGAATGTAGAATG  |
| RGC12735c | EcoRI   | GAAACGTAAACATCTGAATCGAACC  | CGATGCTGCTCTCGTATCTACTACT  |
| RGC12742c | EcoRI   | AACTAACCCAAATGAAATGCTCAAC  | TAGGAGACTTTGAGTACACATGCAA  |
| RGC12804c | EcoRI   | AAAAGCAAATGACTTTAGGGAGAGT  | AAGGTCTTTCCTCTCTCTCGTTTT   |
| RGC12828c | EcoRI   | GTTTTGGATCTTTCTAGTCACAACA  | GGATCTTCCAATATTGTCTACAAGG  |
| RGC12869c | BamH I  | GTTGTACCAATGTGGATGTTTTAAG  | TTCATGCATGTCATGTACAATTGAG  |
| RGC12875c | EcoRI   | CGTAATTCCAGTATTGAAATCCAAC  | ATAGAAGTAAAGAGCGAGTTGCTA   |
| RGC1288c  | XbaI    | CACCAGTTTGCTATTTTAGGCATC   | ATTGTTGGAAAGATAAAGCCTCTTC  |
| RGC12943c | HindIII | CGAGTAGTTTCTCTACCACGATAA   | CATAGATGGAAACCCTCTTTCTTCT  |
| RGC12949c | SacI    | CCACATCCTCCTGAATTAGTCAATA  | CGTGTATAAACCAAGAAATGGGTAG  |
| RGC13028c | Sall    | CTGTAGAAGGAGGTTTCAGAGACTTG | CTTAATTGTCTGCAGGTAATGGTCT  |
| RGC1312c  | HindIII | CACGTTTCGAGATGAATATATGATGA | CAAGTTCGTCCTTACACTTGTGAT   |
| RGC13134c | EcoRI   | TCAACTTGACATGTATTTGATGCTC  | GCTATTGGTACAACCTTTCAACAAC  |
| RGC13159c | EcoRI   | GTTGTTATTGGAGTTGTTTTTACGG  | TGGTCAAGAGATCAGAGAATGATTT  |

|           |         |                            |                            |
|-----------|---------|----------------------------|----------------------------|
| RGC1319c  | EcoRI   | GAAAAGGTGCATGTATTGTGAAACT  | CAAAAAGTTGTTTTGACCTCGTACA  |
| RGC13248c | EcoRI   | AGGGAATATGGACTAACGAAGTTGA  | GTCTTCTTCTCTTCATCCCAAATCT  |
| RGC13289c | EcoRI   | ATCAATGGAGGTCACGTCAATACT   | CCACGGTTAACTTGATCTTATCCTA  |
| RGC13305c | SacI    | TAACCTATTTGGTGGAGGCAAGATA  | CTGAACAACCTTAATGAATCTTTTCG |
| RGC1333c  | Sall    | TGTGATATGATCATGAGTAGCTGGT  | GGGACTGATTAACCTTTCCCTTTCT  |
| RGC13382c | EcoRI   | CTACAAAATAACGTCACCAGGTTTC  | ATATGGTCTCATCACGAAGTTGTTC  |
| RGC13395c | EcoRI   | CTTCCTTCCCTCATCTCTATGAT    | TCACCTCATGATACAAAGTCTCAA   |
| RGC13408c | XhoI    | GTAAGTTGCAGGATGATGTTCTCTT  | ATAAAACCGGTTACCCACTACTTTC  |
| RGC13420c | EcoRI   | ACTGTAAGATCGGGGTAAAGGTTTT  | GCTATAGCTCATTTTGACACCCTAA  |
| RGC13599c | PstI    | CTTCTAGCGTACCGATTTGAATAGA  | ATATAGGGGATTTGATTTCTGGATG  |
| RGC1367c  | HindIII | CAAAATTTCTGGTAGACAAACAAGG  | GAAACTATTGCTGTGTTCTTGTCCCT |
| RGC13684c | SacI    | GTGTATGAAAGAGGATGCAAATCAT  | AATGATGGGAGAAAATCTAAAGGAG  |
| RGC13764c | HindIII | GTAATATAGCTGGTCCTGCTTCTTG  | ATCAGTACAAAGAAGTGTCCGAGAC  |
| RGC13794c | XbaI    | ATCATGTTAATCAGAGGGACTCTTG  | GACCGAACCTATTTTGAATTTATG   |
| RGC13816c | EcoRI   | CGTGTGGTAGCTTTCTAGTATGGTT  | TCGCACTTTGAATTTCTGTCTACT   |
| RGC13819c | EcoRI   | AGCCTTATGAGACCTTCATCTATTG  | AACGATGACTTTGCTTACATCACTT  |
| RGC1381c  | HindIII | GCTCTATTCTGGTAAAGTGAAGCAAG | GGTACAAGCTTAGCCAAAACAATAC  |
| RGC13867c | PstI    | TTAGGTGTGACGTTGATTGAAGATA  | TACTTCTTAGGGATAGCAACACACC  |
| RGC1397c  | EcoRI   | TGCAGACTGGTTATAGGTTTTGTT   | CTTATCTTCCGCCTTACTCATTTTTT |
| RGC139c   | HindIII | GAAACGGTGGTGTGTAATAGAAAAG  | TTCCAATAACAGAACACAGGAATCT  |
| RGC14010c | EcoRI   | TTCTTTTCTTCTACCGTTCACAAAC  | GCTTGTCTGTTGTCTACATTGGTTTA |
| RGC1402c  | EcoRI   | AATATGAGCGGAAAATCTAAGCAAC  | AAACTGCTCAAAAGGTTTTCTAGGT  |
| RGC14157c | HindIII | GTGGTGGCTTCATTTACATTACTT   | GTTGAGAATGAAAGATACCTGGAGA  |
| RGC14226c | XbaI    | CTATTTATTCCACTTGCTGTTTGCT  | TGATGAGGAATGAACTAGAACATGA  |
| RGC14244c | EcoRI   | CTTAACTGATGGCTTAGGAAAATCA  | GTTAATATCAGACTGGACGTTGGTC  |
| RGC14293c | EcoRI   | ATACTTCGTTGATGGTTCTTGACAT  | TAGTTTCTATTCCGGTCCGGTAATA  |
| RGC14352c | HindIII | AAGAAGTATCTATGCAAACCGAAG   | CGTAACCGAATAAGAGAGAGATGAA  |
| RGC14381c | HindIII | ACTACCAAGTGCAACTACAATGGAC  | TGCTACACGAGAGATCCTAGTTTGT  |
| RGC14398c | EcoRI   | AAGAGGAACATTTTGCATTAGGTCT  | GCATTATTTTCGGTGGACATCTTAT  |
| RGC14416c | HindIII | GGAGTCAGATTATCATCACAACACA  | CATAAGCTCCGATTACGATAATTCA  |
| RGC14440c | Sall    | ATATGAACATCAGAACATGTTGCAC  | GACATCTAAACAAATGAACGAGGAC  |
| RGC14452c | BamH I  | GGTACCAGAAATATCTCGGTTCTCT  | AAATAGTTTTGCAGTGGAAAGTACG  |
| RGC14479c | EcoRI   | ATATCATTCACAAGCGACCATAGAC  | AGTTCTTTGAAATCGGGTCATTTCT  |
| RGC1448c  | PstI    | CTCATATGTGGATCCTTTCAACATT  | ACATTAGCTTTATAAGTCCGGGAGGT |
| RGC1455c  | EcoRI   | GCTCTCGTAGAATATGAAGATTGGA  | AATTTTCTATCTTTGGCCTGCTAGT  |
| RGC14573c | HindIII | ATGCTTATGGAAAGATATGGCTTCT  | AAGCATCTTTCTACATTCATCTTGC  |
| RGC14676c | HindIII | AGGCTGATAAGCTGACTACAACCTGA | ACTGTGATAATAGGTGGACAACACC  |
| RGC147c   | EcoRI   | TAACCTCTATTCTTCCACTTTGTCG  | AGAGACGAAAGTAACTTCTGAAGCA  |
| RGC148c   | HindIII | GGCCTCAACCTACTGTAATCTTCTT  | AGAGACAATGAGTGCCTCAAAGTTC  |
| RGC14901c | HindIII | GAGATGACTAGCCAAACGATTTAGA  | CTGCTTTTAGATCGTCGCATACAAT  |
| RGC14934c | EcoRI   | GGAAGTTCACTTGTTCCACATAAAA  | CATATGTACACAAACTCGAAGCAA   |
| RGC15052c | EcoRI   | GACAAAGAGAAAAGAAACGGTAAGG  | CATTAAACCCACTGTCGATAATACG  |
| RGC15061c | EcoRI   | AGGTTAGTAGGTCTCGGAGTCACTT  | AGCTTGTGAGAGAGAAGTGAAGAA   |
| RGC1509c  | HindIII | GTGTTAAATGAAGAATGTTGCCAAG  | ATAGTTGTTAGATCCCAGCTGCTCT  |
| RGC15178c | EcoRI   | ATGTAAGCGACTAACCGAACACTAC  | TGATGAGACTTCTGACATACCTTGA  |
| RGC151c   | XbaI    | CTCCATAGAAAATCGCAAGTAACAT  | GAATCTCTGTACATCACAATGATCG  |
| RGC15219c | HindIII | GGGGTGTACTGTTAGGTTTCTCTCT  | GGAGATTGTCCATAATTTCTTGATG  |
| RGC15280c | EcoRI   | ATTTGTTCAAGGCAAATGTAGAGACA | CAGTAAGACTTTTCTTCCAGGGTTCA |
| RGC15296c | SacI    | TGGTTAAGGTATCTCTCCTCCTTCT  | TATTGATGAACTTCTTGAAGGGAAC  |
| RGC15300c | BamH I  | ATAGTAGCTTTGAGCTGACAAAGGA  | GAAAACAGCTGATTCAAACTAAAGG  |
| RGC15346c | PstI    | TATTGAACGCACCAACTTATGTCTA  | ATGAAAGTCTCTAATTGGGTTTTCC  |



|           |         |                            |                            |
|-----------|---------|----------------------------|----------------------------|
| RGC1537c  | HindIII | TCTTGTGTAGAGGTTGGAGAAGAAC  | AAAGGATCAAACAGGTAAAGGAGAT  |
| RGC15408c | EcoRI   | AGTTTCTATGAGGAACCTTTCAGTGC | TGGAATCTTTTTGGTTACAGTTAGG  |
| RGC15411c | EcoRI   | GACGTGAGAACCAAATTCTAAAAGA  | GCATCTGTCACTGAGTTAGGGTATT  |
| RGC1543c  | HindIII | GGCCTGAAGAATCAAATTACAGTT   | GGACTTGGAGAAAAATCGAGTTAGA  |
| RGC15477c | HindIII | TAAACAAGGAGAGTGGAGTGAGAAC  | ATATGTATATTGTTTGGGAGGAGCA  |
| RGC15483c | XbaI    | ATACGTGGATAGTTTTCTGTACGC   | CCCTCAGTTTATAGCATCTCAATGT  |
| RGC1566c  | EcoRI   | TCAGAGTTTTCCATTCCAGAGTAAG  | ACCACTCATGTCAAAGTTGTTCAGT  |
| RGC15683c | EcoRI   | TACAGCTAACCTCAAACATTTCCAT  | GATAGAGATGACACAAAGGAGCAAT  |
| RGC15702c | HindIII | TGTTCTTCTGTCACCTTAACAATCA  | CTCAATGACATCAACTCATCAAAG   |
| RGC15741c | HindIII | CCTACATTTTTGTTGTTTTGGCTTG  | GTCTACTACTGGTTGAGACCCAAGA  |
| RGC15769c | PstI    | TATACATACCTCGTCCCTCTCAAAG  | TAAAGAAAAACCCAAGAGTTACAG   |
| RGC15812c | EcoRI   | GCACAAATCCACTAATTTTTGAACC  | TTAGAGTTGACCGGAAGAGTACAAG  |
| RGC15844c | XhoI    | GTAGTCGAGTTTAGTTTGCACCTTC  | TATGTACTTTTATGCGTTTCCCTTC  |
| RGC15890c | EcoRI   | AGGGCATATCGATTATGAGTTTCTT  | CGGAGGTAGAGTTGAGAAGCATATT  |
| RGC15930c | EcoRI   | CGACTATGGTAGTACACATCAGCAC  | GAAACCTCTGCAACTGTCAGTAAAT  |
| RGC15937c | EcoRI   | GTGTTATGGTCAAACCTCAATTGTCA | CAAGCCAATTTTATTTCATAGTCTGC |
| RGC15951c | XbaI    | GTTTCTTGGTAACAAGGATGTATGG  | TTCTCTGCAAGTGTTATCCTTCTCT  |
| RGC15962c | HindIII | AAGATAGTGGCTTAGTGCATCAAAA  | GTATTCTGCTACGAGGTTTGTGTCT  |
| RGC1596c  | HindIII | ATGAAGTAAGTGATGACGAGGATCA  | CCACGACTACGACAACAACCTCTCTA |
| RGC16041c | EcoRI   | AGTTGTGCAGCTGAGAGAGTAAGAT  | GTACAAGAAGAGTGTTGTTTGGTCT  |
| RGC1609c  | EcoRI   | GAAGGAGGGAGAGATAGATGACTTC  | CTCTTGAGAGGGTTGTTTTGATAA   |
| RGC16154c | EcoRI   | AGTGTGTGATCTTCAAACCTTACC   | GTTTGTGGTCTTTGGATAACTCAAT  |
| RGC16204c | EcoRI   | ACAACCTGCTCACATTTACATACAT  | GTACAACACGCTCTTATCAAGCTAC  |
| RGC16214c | HindIII | ACGATTTGACAACCGACAATATTAC  | ACGACACTTATTCAGAAACAAAGGA  |
| RGC16310c | Sall    | GCACATGCCCTAATGATATTTAATG  | ACACATACAACCTACACCTTGACTGG |
| RGC16329c | EcoRI   | CTTTGAGCCAACCTAAAGTGAATGT  | CAAGCCTTTCTTTGTAGTGTCTTGT  |
| RGC16357c | PstI    | CATACCTTCTCCTCCTATTTCCCTTC | ATCATAGCAGCCTATAAACTTGCAC  |
| RGC16522c | SacI    | TTCTTCCGTCCTTCTCTATATTC    | TAAGCATCAATTCAATCTCTGTGAG  |
| RGC1653c  | EcoRI   | AGTCAAACAAAGGTCAGAGAGCTTA  | CTCTCTCTCTCCCTCTATTGTTCCCT |
| RGC1662c  | HindIII | TAACAGGCCAAAAGATTCACTACCT  | GTTAAACTCAGCCACTCCAATTATG  |
| RGC16642c | XbaI    | CCAATGTGGCAGTCTTAAGTAGAAT  | CCTGCTTGTATTCTCAATTTTCATGT |
| RGC16913c | EcoRI   | TAGTGTTTGGTTCGTTTGGTTTAGT  | TCTCTTTTCTTGGATTTCTGCATAG  |
| RGC16935c | BamH I  | TCTTCTTCTTCTTCTCGTCTGTGT   | GATCTTGATCAGTTTGGGTTGTATT  |
| RGC1718c  | EcoRI   | TGCTAACGTGGTCTTGTGATATAGA  | GAGCTGAGATCGTTACAACTGAAT   |
| RGC17231c | EcoRI   | ACAGAACTTTGTGAATATGCTGGTT  | TATGGGTTTAAAAGCTTAGCAGATG  |
| RGC1736c  | EcoRI   | GAGGATTAGTGGTCTTAAACTGCAA  | TGGAGGTTGTGGTCTTTGTTACTTA  |
| RGC17372c | HindIII | GCCACGTGACTGATTATAGTTTCTG  | CTTTTGTACTGCCTTTAGTGATCGT  |
| RGC17385c | XhoI    | AGCCCCCTCTCTACATTCATAGAGT  | AAGCTATAAGGGCGTAGTTCTTCAT  |
| RGC173c   | XbaI    | GATCATCAACCATAGTCCAGGATAG  | TATTTGCATCTGGAAACCTAGAGAC  |
| RGC17489c | HindIII | AGGGTGGAACAAGATTCATAACATA  | AATTAACAGTGTGGTCTCTGGCTAC  |
| RGC175c   | EcoRI   | ATGTTTTGCTATTGAAGAACAGGAG  | GTCTGGCAAGTAGAGTCAGTTTGT   |
| RGC17618c | HindIII | GATTTGATGACACCTCAAAGTATCC  | ATTCAGCAGAGGTACTGTGTCAGTT  |
| RGC17631c | HindIII | AGACTCTGGATACTTGGTTTTCTCC  | TGGATGTTACTCCAAAGATTCTCAT  |
| RGC17676c | EcoRI   | ACATTTGTATATTGGCTTGACCTGT  | CATGCTTCTTATGTTGTAGCCTTGT  |
| RGC17695c | HindIII | TTAGCCTTCTTTTGCAGTCTCTCTA  | GAGTGATCGGAAGCTAAAAACATTA  |
| RGC17698c | HindIII | ACTCAATTAGACGGCTCCTAAAATC  | GAGATTTATGGAGGCTTGAACAAT   |
| RGC17699c | HindIII | TATCACTAAGCTGAAACGGATTCTC  | AGCAATGAAGTAACGGTCAAGATAG  |
| RGC17710c | EcoRI   | TCGTTGCTTAAAAGACCCAATAAGT  | ACTCTGGTGGTTATGTGATTCATCT  |
| RGC17769c | HindIII | GTGCTATTACCATTTGCTTTACGAT  | TACGGTAGGCAATATCCAATAAAGA  |
| RGC17861c | SacI    | ATGTTTGTCTTCAAAGACTTACCG   | TAGTCTCAAACCTATGTGCGACTTG  |
| RGC1792c  | EcoRI   | TACGCAGTCTTGAACCTAAGGACTCT | CAAATGGCTTATTGTAGGTGAACTC  |

|           |         |                            |                             |
|-----------|---------|----------------------------|-----------------------------|
| RGC1797c  | EcoRI   | GTTCCAGATTGTCTCATGGAAATAG  | GTTGACTGCTCATCCTACTCAGTCT   |
| RGC17999c | HindIII | AAGCACCATGAGAGTTGTTCTACTT  | CAAACCTAGATGCTAAGATCCAAGA   |
| RGC1800c  | EcoRI   | AGTCTCAAAGCTGTGTACAATCCTC  | GTTGAAACTTTTGGTGTGTTGTTCTC  |
| RGC18142c | EcoRI   | ACTGCATCTTCTGATTGATTAGAT   | CGTTTATGAAAGCGTAAGACTTGTT   |
| RGC18172c | EcoRI   | TAGCTTACCAGAGGAGTGAAATGC   | AATCAGAGAAACCACAAACAAAGAG   |
| RGC18238c | EcoRI   | CGAAGCTCGGTAATTTTCATAGATAA | GTTATAGGTTGGAGATGCCCTAATG   |
| RGC18316c | HindIII | AGCCATTGTAAGTAACAGAGACCAG  | GTCTCTTCTACGTTGTCTGTTTTGT   |
| RGC18337c | EcoRI   | AGGGTTTTCAAGTTAACAACACAAG  | CTCTCTCTCTCCTTTTCCTTGAT     |
| RGC1833c  | HindIII | CTGGCCTTCAAATGTAAATCCTAAA  | GTCTTAAGATTTTGGGGGTTGTA     |
| RGC1836c  | HindIII | TGATTTTGAGACTCCTATCTCCATC  | ATCAGCGTCTTTGTCTATCACTCTT   |
| RGC1838c  | EcoRI   | GAACATCTTAATTTGCGTTGATACG  | GGTGACAGGAAACCAGTCATATTCT   |
| RGC18537c | EcoRI   | CCTTCCTAAACTCTGCAATAAAACA  | TTCTATTTTTCTCCTCTCTCCGAAT   |
| RGC18584c | EcoRI   | CAGGGAAAAATATCAGTTCATGTGT  | AAAGGTATGCTGGTTCTTAAATTCC   |
| RGC18589c | HindIII | TAGTTAGTTGCTTTTGATTGCAGGT  | GGTAAGGAGTTTCCATCTGAAAGTT   |
| RGC18651c | EcoRI   | GGTTTTCTAGAAGCTCTCTTTGCTC  | CTTTCTCCCTCTCGATTTATCATTT   |
| RGC1871c  | EcoRI   | CACGAGCTGATGTTAATGACTTATG  | AAAGTGCTTCTTCAAGGACTCTTC    |
| RGC1879c  | EcoRI   | ATACAGTTTCAAGGAATGTCTTCCA  | AGCTGACTTATCGACATTTCAAAC    |
| RGC1883c  | PstI    | CGGATATGTGATAGAAGTCTTGCC   | GAAATGAAAAACAAACACAGTACC    |
| RGC18965c | SacI    | CTGAGACCTAGCAAAGAACTCAAAC  | AACGTCTAATCTCAACGAAGAGCTA   |
| RGC19084c | EcoRI   | TCTTCTCTGTTTCTAACGGCTCTAA  | CGACCATAAGCATAGACTCTTTTGT   |
| RGC19152c | EcoRI   | AGTCTACCTTTGAAAATCATTGCAG  | CATGTGAAACTAATCAAGCTCAACA   |
| RGC19350c | HindIII | AATGTATGTAGGCCACACAGGTTAT  | GGCAACCTCAATATTGTTTTACAGT   |
| RGC19516c | EcoRI   | TAGTGCATGAATGTCTGCTTAGTGT  | GCGATTGTTCTAACAAAATCATGTG   |
| RGC19563c | EcoRI   | GTAGATTTCTAACGCATGCAAATTC  | ATCTCGATGATCAAAGATTCAACAG   |
| RGC19763c | EcoRI   | ATAAATCATAATGGGACTGGAGACA  | GTTTTGAAACTCGGTGTGTTATGTT   |
| RGC1979c  | HindIII | TATGAATGTGTGTGTTTTCAGGACA  | TTACCTACCGTGTGTTAGCAAGAAAG  |
| RGC1982c  | EcoRI   | TTTATCCGCTCAATCTTTATCTGTG  | CCAACCGACTCCAACTCTTATAAAT   |
| RGC19850c | HindIII | CTGCAATCGTTGTTCTGATTGACT   | TGATGCTGTTCCCTTCTTAGACTTA   |
| RGC19895c | HindIII | TCGTACAAAAGAGACTGGAGAGAAC  | CTGGCGACTTAGGAAAACTATGTA    |
| RGC19925c | HindIII | CAAATAACTAATCTTCTGGGGGTTT  | AGGGAGTTGGACAGAGTAGGTAGTT   |
| RGC1995c  | XhoI    | GCAGATACATAGAGAAGGGAGTCTG  | AGGAATTGGATATTTCTGGGTTTAG   |
| RGC19961c | EcoRI   | CTACTCTTCATTTTTGGAGTTCCTG  | ACTCACAATGGATAGTTGGTATGGT   |
| RGC1996c  | EcoRI   | AGCCAATGAGTTGCATAAGATAAAG  | GTCGAACTAAACGTTAAAAAGCTGA   |
| RGC1999c  | HindIII | AGTGTTTCAAAGTATCCATGTCAGA  | CGGATAGATACCCTAATCCAAGAAA   |
| RGC20165c | EcoRI   | TTATCACTTTGGGTGGTATATCGAA  | GGCTAGCTTCATACAGAAATCCATA   |
| RGC20183c | XhoI    | CAGCTACTGGCTTCTTCTCATTTTA  | TACAACCTCAGTCAGATCCTTCCCTCT |
| RGC201c   | EcoRI   | AGAAGATTTCTGTCTTCATGTACGG  | GCCCTCTGTTTCTTGAATTGTTAC    |
| RGC20400c | PstI    | TACTATACAACAATGAACGGAAGCA  | CTGGTTATTCTCAAGAACCTACAA    |
| RGC20412c | XbaI    | CGAGAACCAACAGTTAGAGGATAAA  | AGTAAACATATAAATGGCGTGTGGT   |
| RGC20489c | HindIII | ATGTGAAACCTAGTGATGACCAAT   | ACTTCATAACGTCTTGGAACTTGAC   |
| RGC20497c | XhoI    | TACAATGTATACGCCAACCCAGCTA  | TGTAACAGCATACCCTCTGATACAA   |
| RGC2049c  | SacI    | GGAGAGTTATTGAGCATGAGGATAA  | ATGATGTGACGTACAAAGAAGATGA   |
| RGC20584c | HindIII | ACCGAGTTTATCCTGTTTCCTTAC   | GTCGACACGTTACGTTGATTAAGAG   |
| RGC20593c | EcoRI   | TATTGCATTCTCCGTTTCAGTTTAC  | AACTTCACTTCTCAGGTTTTTGTG    |
| RGC206c   | HindIII | CCCTTTTACAACGATATTCATTCTG  | TGTTTGGTGAACCTGACCAATATGTA  |
| RGC2070c  | EcoRI   | ATCTGACCTGTATCCTGAGAGATTG  | AGTTATGAAAGCGCACATTTTACTC   |
| RGC2076c  | EcoRI   | GGCTTCTTTGGTTCGAATATCTTAT  | CCTTGTAACCCTAAATCACACTCAAC  |
| RGC20779c | HindIII | TCAGAATAATGAACACTCCTGAACA  | AACAGTCGAGAACCATCATATCAAT   |
| RGC21003c | HindIII | GTCACACAAGCAAACAAAAAGTATG  | ACGTGTTACAGTGTGAGGAAGGTAT   |
| RGC21070c | EcoRI   | TATTTACATAACCCTGACAACGAC   | ACAAGAAGCTGTGGTCTACAAGAAT   |
| RGC21094c | HindIII | TATATGATCAGTATGCACTCGTTCCG | TGGTTCTAATGGACAAGACATACCT   |

|           |             |                            |                            |
|-----------|-------------|----------------------------|----------------------------|
| RGC2115c  | EcoRI       | AAACAATAATACCAATGAGGGCTTC  | AAACTTGTCTTCGCGTTGTTAATAG  |
| RGC2126c  | HindIII     | GATGAACCTTGTGGAGAAATGAGA   | ACTCTCACAAAGTTGAAAGGAATCAC |
| RGC212c   | HindIII     | ACTATCCCATCACCACCACTAAGTA  | GTTTTCAACTTTACCCCAAGTCTTC  |
| RGC21373c | EcoRI       | CTTCCAATTAACAATCCATCACTC   | AGAGTTAGCTTTTAGCAATGTGGTG  |
| RGC21423c | EcoRI       | GTACCTCCAAAATTTAGCGATTGT   | GTTCCGACGTGGATAGTAGTAATTG  |
| RGC21459c | HindIII     | CATGCACGTAGACATTGTAGAGAGA  | CAGAGCAAATAAAAGCTTCTCACAT  |
| RGC2145c  | EcoRI       | GTTACTTCAGCAACTTGATCTGCTT  | GGATCAATAACACAGAAAGCAAAAA  |
| RGC2146c  | EcoRI       | CTGAGAGATGGTCATTAGTGAATCC  | TTAGAAACGCCATTAGAGAACAAAC  |
| RGC21483c | HindIII     | TGATATTATTCTTGTGGTGGGAAGT  | TGAGGGAAAAGTGAAATAGGACAAG  |
| RGC2153c  | HindIII     | AGACATTTGCTTATGGACTTGTGAC  | AAGGGTTTGTACACACAATTACGTT  |
| RGC2155c  | HindIII     | AACCAAACCAAGTGTATATGAGGA   | CCACAGTTTTCTTTGGGATAATTG   |
| RGC21614c | EcoRI       | TTGGAGAAAGAGATGTTGAATTAGG  | GTTTGGTTTGGTTTGTCTTCTGT    |
| RGC21683c | EcoRI       | AATTAGCGATGTATTTGTCAGAGGA  | GACTTCACTCATCAGCTAGTGGTCT  |
| RGC21684c | HindIII     | CTCCAGCATATGGTTAGTTTCAGTT  | GCTTCAGTTTCTTTTCCCTAAGGTC  |
| RGC2170c  | HindIII     | CGGATTCTGATTTTATGTGGTTAAG  | GAGTTTTCAAGACGAACAAAAGTGT  |
| RGC21710c | HindIII     | CCTCACGAGTCTCATAAATGAAGTT  | TTTTATTCCGGTGAGTTTGTCTAAG  |
| RGC21716c | HindIII     | TTAGTAATGCAAGAGAGGAGTTTCG  | TGCTCAACAGGTGACTACAGTAAAA  |
| RGC21796c | PstI        | TTACTGTGCTGTTGAACCTCTATGA  | ACAGTAAACCAGCTTATGTGTCCTC  |
| RGC21838c | EcoRI       | GATACAGATAAAACATGGACGCAGT  | GTTTGTCTCGATCTCTCTTTATCCA  |
| RGC2185c  | HindIII     | CAGACTGCAAAGGAGTTAGAGTTTC  | CCATGTCAATAATCTCCACATACAA  |
| RGC2192c  | XbaI        | TGCTAGAGGAAGAGAGATCAGACAT  | TCTGAGAGTTACTGGCAAACCTTCTT |
| RGC2194c  | EcoRI       | AAGATTGTTGTCTTGTGAGTGATGA  | CAAAGTAGTAAGCTTCTCCAACCTGC |
| RGC21966c | HindIII     | GGCAGATTGTAACGCTAAGGTAGTA  | GCTTCTCTCCATGAGATTATTCAA   |
| RGC22105c | HindIII     | TCTTTTCCATTGACCTAGTTTTCCAG | CGAAAATCATGACTTATTCTCCACA  |
| RGC2219c  | EcoRI       | TGAATCCAACAGATATCATGAACAC  | CTAGTGCATAGTGGGACTCGTACTT  |
| RGC22331c | HindIII     | GGTAAACTTTTCGATTTACAGAAGA  | TAGCTTAAATCTCTGCCACGTAAAC  |
| RGC22415c | EcoRI       | TTGTGTCTCTTGTGCTGTCTGTAT   | ATGCATAATTACAGCAAGGTCTCAT  |
| RGC22512c | HindIII     | CTGTTGGTTACAAATCCACCTTTAC  | CTCATTCTGGTAAAAGAAAACCTGA  |
| RGC22627c | HindIII     | TGACCGATAATCAGGTAAGTTCATT  | TCAGCTTCTCTATCTCAAAGCTCAT  |
| RGC22628c | EcoRI       | GTGTCACCATGAAGAAAAGAAAAC   | GAGCTGCTGGTTATGTTATAAGGAA  |
| RGC22795c | SacI        | GATTCCTTGTCAACAACCTCATTAC  | ATCATCACCAGAACTCTATCAAGC   |
| RGC2286c  | EcoRI       | CTGTTTTAATGCTTCAACGTCAGTT  | TTTATAGAGCGGACAAACTCAACTC  |
| RGC22968c | PstI        | GATGGAGAGAGAGGGAGAGATAAAG  | AAGCTGGTGATTGCATCGTTAATA   |
| RGC23031c | HindIII     | GTATCACACCGTGGTGTTTATCATC  | GCGAGGTCTCGTTCTTCTATTTACT  |
| RGC23150c | HindIII     | GCTGAGAAAGCACAAATTTTACAGT  | CTAGACCTTCTTTCTCTGAGAGGT   |
| RGC23188c | BamH I      | ATAACGAGGTCCATATGTTTTCAGA  | ATTCTGGGAAAAACTAATTAGACG   |
| RGC23207c | HindIII     | TCCGGTAAATGATTCGAGATTAGTA  | TAATGCATGTACGTAAGAAGGGAAG  |
| RGC2328c  | HindIII     | ACAGCATCTTTGGTTCAGTTATCTC  | TACGATATAGGTATCTGGCGCTTTA  |
| RGC2343c  | HindIII     | TTATCTAGCAGCGGACAAATATGAG  | CACTGATATACGAATTGCACGAATA  |
| RGC2344c  | EcoRI       | ACGTAGACAAGACATAACCCACAGT  | GAGAGGTAGATCGACTGATATTGGA  |
| RGC2356c  | Sall        | AACATTATCAATGGTAGGTCCTTCA  | AGCTCTTTCTTTGCCTTCTCTAATC  |
| RGC235c   | HindIII     | TCCACGATTGGAGATAGTACTTGTT  | CCACGTTCCACGGTATATTGACTTAT |
| RGC23650c | HindIII     | CGTTTTTGTTCATGGATCAGATAGT  | ACACACACACATCTCAAATCATTCT  |
| RGC2369c  | HindIII     | CAAAGGTTACGTTTCAAACTTGTTT  | AGCTTACCAACATGAAGTTACAAGG  |
| RGC23821c | XbaI        | ACTATTCTTGTGTTTGGCCACTATCG | TGAGTCTCTCAAATGGAACTCTTC   |
| RGC2383c  | EcoRI       | GAATAAAAGGCTTGGGACATAACTT  | ACACGTAGTGGAAATGTTTACAAGGT |
| RGC2386c  | BamH I/SacI | ATTTCCATTTTCTCAACAGATCCT   | GGAATCGATCAGTCGTATAATCTTC  |
| RGC23911c | EcoRI       | GATGGATATTGACTACATGGATGGT  | ACATCAAGACAAAAGACATGACAAGA |
| RGC24023c | HindIII     | CCTCTCTCTATGTGCGTCTTTAG    | CTCTCCTCTTCTCTTTCCAGAT     |
| RGC24282c | EcoRI       | ACTTCCCAAACAAAGGACAAAGATT  | CTGTTTCCGTCTATGAGATTGTTCT  |
| RGC2431c  | HindIII     | TCTTACTACAAGAGCTTCGACCAAC  | ATGTCGTCTCTTATGATAACGCTTC  |

|           |         |                            |                            |
|-----------|---------|----------------------------|----------------------------|
| RGC24370c | PstI    | CACTAGCAGATCCTGAAGATCGTAT  | GCTACTCCTCATAGCGACAAAAATA  |
| RGC2467c  | HindIII | CTAACGTTGCTATACTCCCAGCTAA  | CAACACCATTGTTTTTATCTTCTCC  |
| RGC2472c  | PstI    | GACAAACGTCTACAAGTTGAAGGAT  | TGATTTAGTACTTGTGGGTTGTT    |
| RGC24745c | BamH I  | AACGACGACATATAATAGGTGAAGC  | ACTTATACCATCCTTCTCTGGTCT   |
| RGC24823c | EcoRI   | GTTGAGCCATGCAATACATTATACA  | AACCAGTCTCCCTATTTTCTTCTC   |
| RGC2498c  | EcoRI   | TAGGTGCAGCTTCTTACTTTTCATCT | ACCATGAATAGAAAACAACATCAGG  |
| RGC2511c  | EcoRI   | ATGGAGATACGGCTCTACAGTTCAC  | TACTTCATGTTTTGTGCATTTTTGC  |
| RGC25318c | EcoRI   | CTTGCACTGACTCTATGAACATTCTG | CACACATGTGGGAATGAAACTATTA  |
| RGC25363c | XbaI    | TGGGTATTATAGATTTACGGTCGAA  | GTTGATTCTTGAAGGTCTAGTCGAG  |
| RGC2546c  | XhoI    | ACACCAACTCCTTCATATTTGACAT  | CTCTGTGTGTGTTTTTATTCTTTTC  |
| RGC2574c  | EcoRI   | GTTTTTGTGTTGAACCTATTCAGTCG | TTTCTGATCTGAATCTTCTCTCTCG  |
| RGC2575c  | EcoRI   | AAAATCTTATGCAACTAACGTAGCC  | CTGTTATAGATGCGATGAGACGAGT  |
| RGC258c   | EcoRI   | AGGTTATTGGTCCAAACGATATGTA  | GACATTGATCAAAACACCAGATGTA  |
| RGC2630c  | XbaI    | CTTTTACTCTTGTGCTTGCTCTTCT  | AAAGGAACCAGTATGCCAGTATGTA  |
| RGC26589c | HindIII | ATCTCTGTTGTGTTTCGTATGTTCA  | TAGCAATCCCTATTGAAGCAGATAC  |
| RGC265c   | EcoRI   | ACCTCACTCGACAATGACAATTTAT  | ATCAATGGTACGACTCTAAACCCAAA |
| RGC2666c  | EcoRI   | CATGAGAACTTTTACGTATGATTG   | TGTGAAAGCTCTTTTAAATCCATTGT |
| RGC26764c | HindIII | ATGGTCTGACGAATAACGAGTTTA   | CCGAGGAAGCTGTTCTTATACATCT  |
| RGC2676c  | EcoRI   | TATTTATTTTGCATTAAGTGCAGTG  | TCCAATATGCTTTTTGACACTAGAA  |
| RGC2683c  | EcoRI   | ACAGCTTATAAGTGGCAGTCTGTTC  | CTGCGATGGTTAAGTTTAAAGAAGA  |
| RGC2693c  | HindIII | AACGAACAACCTAAACTAGCAAATG  | TATGTTGAAGATTGAGACTGCTGTG  |
| RGC2698c  | HindIII | ATCTCTTGTCTTTCGAAGTGTTCCAG | ATGATGGCTATGTATCTCCAACCTGT |
| RGC2699c  | HindIII | CACGAAGTCTGGTTATGCAATTTAT  | ATTGGTCTCTTATTAGCAGGGTTTC  |
| RGC2709c  | EcoRI   | CCACTACTGTTGGCTACTTCTGATT  | CATGTTACCACCTACGTTCTTAACC  |
| RGC2715c  | HindIII | GGTTTCAGTACGAGACATGAAAGTG  | TCAACTGGAGACTACTCTGCTTTCT  |
| RGC27211c | EcoRI   | AGTTTGTCTCCAATAAGACCTGTCA  | AGCATCCTCACCATTATTCTCTTCT  |
| RGC2728c  | EcoRI   | AAAGAAGTAGCTTCTGGTCTGCATT  | GATGATCTAAAAGAAAGGCATGTGA  |
| RGC27467c | PstI    | AACATAGCAAACCTAGAATCCGTAAG | ATTTTCATATTTACGCTGTGGTTAGG |
| RGC2749c  | EcoRI   | CTTTCTGCTTCTTAATGTTCTCCAA  | TTGTAGGAAAGTTGAGTCCTAACCA  |
| RGC274c   | EcoRI   | CCCTTTCAAATTGTTGTTGAGTAAC  | TCCAGATGGATTAGGTTTTGATGTA  |
| RGC2758c  | EcoRI   | TATTTTGTTCACATCGATTTTGTG   | ATATGGTGTTTTACATGTTTTACG   |
| RGC2779c  | EcoRI   | AGCAGGATTGTAACCTGACAATAG   | ATCCGTCCTTTTTATTTTATCACTC  |
| RGC27939c | PstI    | CTGCAGGATCAACATGTAATGTAAC  | GTTATTACAGGATTCTTGAGCACATT |
| RGC28054c | HindIII | AGCCTCAAATACATTTTCACTCAG   | GCTTCAATATCTTGCTTTCAGTTC   |
| RGC2807c  | HindIII | GAAGCTACAATCACCGATGTTACTC  | ATGTATAAGGACAGCCAATGTGTTT  |
| RGC2833c  | PstI    | TTTGGTCTGTTGTAGGTTACCAAGT  | TCTTCTTCATTGACCAGGAAGTATC  |
| RGC2885c  | XhoI    | TTGGGAATTGGTGGTAGTTAGTTTA  | ATCAATCAACACTCAACCTAATGTG  |
| RGC2894c  | EcoRI   | AAGACAGAGACAAAAGAAGACGAGA  | TGTAACTGGAGAGGCTGTTATTACC  |
| RGC2914c  | EcoRI   | GGCACTTTCACCGTCTCTAAATAAT  | TACCACACACATCCTTGTTTTTAC   |
| RGC2932c  | HindIII | GCATTTTCTAGACGAAGTTGATGTT  | GCACCCAAATCAAGGTATATGTATG  |
| RGC2981c  | HindIII | TAATAATCTGCCTCTTGGTCATCTC  | CAGTGGCAGGTTCTATTGTAGTTCT  |
| RGC2987c  | HindIII | CTATTAGTTTCTGGATTTCCCTTT   | GTCTCAAGATCTCCCCTAATGTTGT  |
| RGC29914c | HindIII | CTACACAAACCTCTGAACTTGTGGT  | GATTTATATCCAGCTGAAACCATGA  |
| RGC2994c  | EcoRI   | TCTGTTAGGCACCTGATATTGTAT   | CATTCATCTTGAACCTTCTCAGTT   |
| RGC2998c  | EcoRI   | AGAAAACTAGGAAAAGGAGTGCTG   | TAGAGAAAAAGCAGCAAAAATGTGG  |
| RGC3002c  | SacI    | TACGTTTCTCTCTCGGTATAAGCAT  | ATGAACTTTGACTTGATCTTTCCAG  |
| RGC3008c  | EcoRI   | TTTGGTAGATGAGGTCAGAATTAGC  | AGTTCATAGTAAAACAGGCCATGAA  |
| RGC3016c  | EcoRI   | TAATGTCTAACGCAGATAGGGAGTC  | TTGAAGAATCTCTTCTCATCCATGT  |
| RGC3045c  | PstI    | CTAAAACCCTTAAATCGATTCTGTG  | AACTGAGATTGAGAGACAGCAAAGT  |
| RGC3063c  | EcoRI   | AGTTACATAGATACACGTCCCCAAA  | AAGCAGAGATATGAACAGTTCTTCG  |
| RGC3069c  | EcoRI   | GCAGTGTGAGTACAATTTGCTTTA   | AATACAGCCTGGTAATTTTCAAGTGA |

|           |         |                            |                            |
|-----------|---------|----------------------------|----------------------------|
| RGC3081c  | HindIII | AATATTAAGCCCTTTGCGAGTGTT   | ATATCTAGAGAACCAAACCGAACC   |
| RGC3130c  | HindIII | CTACGCTTTGAACATTACCAGTTTC  | CAGAGATTGGAGGTGGAGATAGATA  |
| RGC3132c  | BamH I  | TCCTTTTACAGTTTTGTACCTTTGC  | TTCTAAGCATGATAGAGAGCCAAAT  |
| RGC3153c  | PstI    | AATGCTCCATGATATCTTTACCTGA  | AGTTAAGGTACAGCTCTCGGATTCT  |
| RGC32005c | XhoI    | TGCTAATGACCAAAGGACATACATA  | AAGGTGATATCAATGGAAGGTATGA  |
| RGC32186c | HindIII | TAATGACAGGTAGGTCCATTTCAAG  | CCTAACCTCATGTAGAAATCCTGGT  |
| RGC3235c  | EcoRI   | CAAGAAGATTCTCCAAGTCTTCAAC  | CCAGATACCTTCTTTCACTACCTCA  |
| RGC32871c | PstI    | ACCCAGAGCACATATGAAGTAGAAT  | CGTATGGTTTGCTACTACAGGAGTT  |
| RGC3295c  | Sall    | CAAACCTTGAGTTTCCTTTTGTCTGT | ATCTTGACCTGTTTCGTTACTTTTG  |
| RGC3356c  | EcoRI   | GAGACCCTTTCAGGAAACATAAGAT  | TCCTTGACTCCTCAGAGAATAGAGA  |
| RGC3380c  | HindIII | GAGTAGATTACAATGCTTTCAGGT   | CCATTAGTCAACATCAGAAACATCA  |
| RGC3382c  | PstI    | CTCTCTGCTCGTTATATCACTGGTC  | ATCATGTTCTCATCAGAGGTTTCCTT |
| RGC3412c  | HindIII | ACTGGCAAGATCAATGTTTGATAAC  | TTGATGAGAGTGAACAATTGACTA   |
| RGC3413c  | HindIII | GTTTTCAATCTTCTCCAAACAAC TG | AAGGAGAAAAGTGAGATTGAGAGGTT |
| RGC3431c  | HindIII | AGTTCATTCAACCTATTACATCCA   | TCCTTTGGAGATCTTGACTTTATTG  |
| RGC347c   | Sall    | CAAGTGGAGATGATATCTCAGTGAC  | TTCTTTGTTTACACACTTGTTGACC  |
| RGC3490c  | EcoRI   | CCCACAAACAAAAGAGAAGACTTTA  | TGGACAAGAGATAGTGGGTCTAAAA  |
| RGC355c   | HindIII | ACATTCAACGCTATCTTGACCTAAG  | GTAACGAGTGTGCATCTATTTGTTG  |
| RGC3577c  | XbaI    | ACTTAGACCCTCAGTTGTCGTTTTA  | TCGAAAAGTAATCCTCTGAAACATC  |
| RGC3637c  | HindIII | CGACTCCAGATGCATAATAAAGACT  | ACACGATGAGATGATGAAGAAAGAT  |
| RGC3643c  | HindIII | TTAGTGTACCAATCAACAACACACC  | TACAGGGAAATGATTACGAAAGAGA  |
| RGC364c   | XbaI    | TATTATACCACAACCTGCTCGATTT  | AAGCTAATGTCCATTACAGGAAAGA  |
| RGC3691c  | HindIII | GCATTCTTGAACCAGAGACTTGTAG  | GTGCTTGTTCTTTAGCTTTTTGAAG  |
| RGC3696c  | HindIII | ACATAAGCAAAGCAGAAGGAAATCT  | TAGGGTCTAGACATTAGGGGAGAG   |
| RGC3758c  | HindIII | GATGTGCTGGAGATAGTACTGCTTG  | AATCTGTACAAGGTGAGAAAAACCA  |
| RGC3773c  | EcoRI   | ATATAAACTCGATGAAACCGTACCC  | GAAGAGTGTGCTCAGAGAGGTTTTC  |
| RGC3820c  | SacI    | GTGTCAGCTACTGAGTTTGTGTGTT  | CCTCATCTGCTGAGCTACTTCTTAC  |
| RGC3886c  | SacI    | AACCAGAGTGAATTCTCAAACCAG   | TAACAACTCCAACAACCTATCAGCAC |
| RGC3942c  | HindIII | AGACAAAAACCATCCCTCTAACAAT  | TATAACTCAAATTCTAACCGGACCA  |
| RGC395c   | EcoRI   | AAGACAGAGATTTAGGAAGGGAAGA  | AGACAAGACCTCTTTTGTCCTTTTT  |
| RGC3985c  | EcoRI   | AGGTTCAAGATGCATACAAGAGTTC  | ATGGTCTATTCCACCAAATATTCC   |
| RGC3995c  | PstI    | GTAGGTAGGAAACCAGTGATGAAGA  | GGTGGTTGTTCCTAAGACTAATTGA  |
| RGC4004c  | HindIII | GTATGTCCTATGCTCAACAAACCAT  | GGAGCTGATGACTTACAACATTCTC  |
| RGC4050c  | SacI    | TTAATGCAGGAGCTATTACAAATGC  | GAATCAAGATAAAGAGTGGAACCAA  |
| RGC4056c  | HindIII | TTATGTTAGCTGGAACCATTCTTAA  | CTACTATCGTTTTCCACATTTGTCC  |
| RGC4058c  | EcoRI   | ACTTGCTCTGAGTTAACAACATTCC  | ACGATTTCTCCTCTAGTTTCTGTT   |
| RGC4062c  | PstI    | TGTGTTCTTATTACCGCTAAGGTTT  | TGGACTTTGAAAGAACGAGTAATTC  |
| RGC4083c  | EcoRI   | GAAGAAAACGTCTCTGTGTTTTGAT  | GATAATGCAAATGGTACGCTAAATC  |
| RGC4098c  | HindIII | AAGTGAACATACACTGTGATGGATG  | ATCTGATTAGCCAACTGTGATTGAT  |
| RGC4102c  | Sall    | CACGTCATACCTTGCTGTTTACATA  | CCTGTTTTATTGAGCATTCTAGCTG  |
| RGC4124c  | HindIII | CAGAACTGGTCCTAGGTTTGTTAAA  | GTACACGACCGTACAATATACCACA  |
| RGC4166c  | EcoRI   | TGAAGTAACATTTATCCATGTGGTG  | TAAAGTGAATGACTGCAACTTCTCC  |
| RGC4195c  | EcoRI   | AACTTAACAAAATACCTTGCGGTCT  | TCAACGAGTAATTTGGATTCTGTCT  |
| RGC4199c  | PstI    | GTTGGAATGATAAATATGCACTTGG  | GTTTGTTAAAAGGGGTAAGATGTGA  |
| RGC4219c  | XbaI    | CAAGTTTCTCTTGAACCTTCTTGAG  | TGTAGCTCCCAAATTTTACTTGTC   |
| RGC4231c  | HindIII | TTTACCCTCCTACACTCTCCATGT   | CAAGGGTTAGTGACAGCCATATTTA  |
| RGC4257c  | EcoRI   | TCACAAATATTCGGGATCTAAGTGT  | AGTAGTGGTAGTGGGGATAGGTTGA  |
| RGC4350c  | HindIII | CAGATCGCTAAACCTATTCTTCTT   | GATATACACAAAGGAAAACGCAAAC  |
| RGC4352c  | EcoRI   | TATTCTATGTGATTTGCCGGTGAG   | GTTATTAATAATGCAGTTGGGGAAC  |
| RGC4381c  | EcoRI   | TATTCGTTTTGAAAGTCCAAGTAGG  | GCTTGATTATTATCCAGAGGAAGGT  |
| RGC4388c  | EcoRI   | ATAAGACATGAATGATCGAACCAAC  | ACTATTTGGGAGAACTACGCTTTTC  |

|          |         |                            |                             |
|----------|---------|----------------------------|-----------------------------|
| RGC4391c | EcoRI   | GTTACTTGAACATAAAAAGGGTGTGC | CTGGCTTTAAGGCTTTTAAGATTGT   |
| RGC439c  | PstI    | GTGGATATAATTGTCTGAAGCAACC  | GCTGTGAATGTGATACATGAGAGAC   |
| RGC43c   | EcoRI   | TGCATATAGCACACATGTAACACAC  | ATAGGTCACTGAAAATTGAAGATCG   |
| RGC4403c | HindIII | CAGAAGATCAGCCATTTTGAGAATA  | AGATCCAATCAAAGCTATGTGGTAA   |
| RGC4411c | HindIII | GGCCTTACCTTTTCGATATCTGATT  | TTGATCTCTCCACTATGATCGTACA   |
| RGC4447c | EcoRI   | ATGGGTTTGATCGATCTGTTATCAT  | CAAATCATGCTCTAAGCTTCTTCTC   |
| RGC4451c | EcoRI   | TACTTAGCTTGTGAGAATCGTGATG  | CGGTCGAGCTAAGACTAAAGATAGA   |
| RGC4476c | EcoRI   | TTACTGTCTGTTTCCTCTGGATGTT  | TCGTAAGGTAAACAAAACAGCCTTG   |
| RGC4480c | BamH I  | GGTGTCTCGTCATATCTTTTGAAGT  | CAATTGAGATGTTTGACAGAAAAGTG  |
| RGC4495c | EcoRI   | TAGTTGCTTCAAAGCGATTAGAGAT  | AGTTGAGATCATTATCCGATGTAGC   |
| RGC4505c | XbaI    | CTATATCAGAGTCATGGTGGTGTTG  | AGTAAGATAACAAAACACTGGCATTTG |
| RGC4518c | EcoRI   | CTGCCAGAAATAGTTGAGCAGTAAT  | CTGAAAAGGATCTTCAATGAGTTA    |
| RGC453c  | EcoRI   | TGGCTTAAGTGATGAGTGCTTAAAT  | CGTCAAAATATGGGTGAAAAAGTCT   |
| RGC4546c | XhoI    | TGATATCCTCTCTCAGCTCTCTGAT  | GTGAACACCGATCATTACATCACTA   |
| RGC4566c | EcoRI   | TGGCAGATGATATGAAAGAGAAAAGT | ACTAACCCGAGTTGCTAGCTTTATT   |
| RGC45c   | HindIII | GGTATTGGTCCCATTGATTGTAAAG  | CATGCATCAATAGTCCCTAAGCATT   |
| RGC4610c | EcoRI   | CAACCAATAATTTTCGTCGTTGATAC | ACCGGTTTATTTAACTTCCAGTTTC   |
| RGC4639c | EcoRI   | TAGAAAGGACGATTACAAGGCTATG  | GTGCATGAATCCTCAATCTTATGTT   |
| RGC4640c | PstI    | GTCTTGTGTGATGAGTTGAACGAC   | GGAATCAACTTGTTAAGAGCATTGT   |
| RGC4642c | EcoRI   | CATAGCGTCTATCAGCTACTCATT   | TACTAACGGTGACGGTAACAGAAAT   |
| RGC4643c | PstI    | AGCCCTTTACACTATGTTGACACTC  | TACCTGGTGAACATCTCCGATATAA   |
| RGC4665c | EcoRI   | TATTTGGTCAGATGATGGGTAAAGT  | ATAATGAATCCCTTGACATACAGT    |
| RGC4679c | HindIII | TCAAATAATGTAACGCTTCTTCTCC  | GAGCACAAGATCGATAGAGCTAAAG   |
| RGC4684c | XhoI    | ACACACACAATCTTTCTTCTTCTCC  | TGACTATATTGATTGCTGCTGCTAC   |
| RGC4695c | PstI    | CTCCATTCTTCATCACCATATAACC  | GATGTAATGAAGAGGAGAAGACCAA   |
| RGC4722c | EcoRI   | AGGCATAATAACTTGGAGGAAATGT  | TACACATGCAGCTACAACCTAGAGA   |
| RGC4797c | EcoRI   | CAACAGTTTCCAGTTAATCAAGAGC  | CGTATTGGCTTCTAATCAAATCATC   |
| RGC4812c | EcoRI   | TAACAACCCACATTAATTTGTCTCC  | TCACTAACTAGAAAAAGGTCCTCG    |
| RGC484c  | EcoRI   | GACCACCTAACCACTTAATTCCTTT  | GACCATACCGATGATGTTTCTTTAC   |
| RGC4853c | EcoRI   | GAGAACGCTAGACAGTATGACTCAA  | TATCTTCTCCTCTATTTCGCACTGTT  |
| RGC4895c | EcoRI   | TGTTTCGTGTTCTTCTTCTTACACA  | GAGAAAAGCAACTTCCCTGAAAAGAT  |
| RGC4940c | EcoRI   | GGAGGTTCTTTGTTCTAACTTGTGA  | GAAAAACAAGAGCTTTGGAGAGAGA   |
| RGC4948c | EcoRI   | CATGTGCCACAATGATTTACCTTT   | CAATAGTTTGGCCATCAAATCACTA   |
| RGC4977c | EcoRI   | CCGTTCCCTGTAGTGATATTTGTTT  | AATAGACGTGTGATTCCGAGTTCC    |
| RGC5007c | XhoI    | TTGTCTTCTTACTTGCTGAGTTCCT  | GACTGAATCATTGTTAATCGGAATC   |
| RGC5019c | EcoRI   | TCCACCATATTATTGGAACAGTCT   | TATTTGTATAGCTGCTTGCTTCGAC   |
| RGC5031c | HindIII | ATTTGAGCGAGTCTTATGTGACAGT  | AGTTTGTCTGAGGCTAGTACCAATG   |
| RGC5105c | HindIII | AATATGCTAGCTTGTGACAGAGACT  | CTCCTTCAACTTCAAGAAATACAGC   |
| RGC5183c | EcoRI   | TTATTTGATACGGGGTTTAGATCCT  | ATGCCACATTTTCATGTAGCTTGTA   |
| RGC5191c | HindIII | GTGACCAAAGTTATCTCAGAATTG   | CCAAACTAAACAAGAAGATCCACAC   |
| RGC5211c | HindIII | GTGAAAGCATACCAAAGAAGAGTGT  | ACAAGCATACACCTAGTCATGTTCA   |
| RGC5236c | HindIII | GTAGCAAATTACCATCAGACAAACC  | AGCTTGACCATTTTATTGTGTGCT    |
| RGC5241c | HindIII | TTCTCCTATTTCTCTTTTGGTTTCC  | TGAAGAACTGGTTACATGTCAATG    |
| RGC5299c | EcoRI   | AACGGAAACTGTCTTTCTTCTTCT   | GAAGGTAAGTGGGCGTTTTATTTT    |
| RGC5306c | HindIII | ACCTTCGTCTTGTGTTGTTAGAAG   | CTTTTATCCTCTGTTTCTTGGTGAA   |
| RGC5308c | EcoRI   | GGAATGTGGAAGTGGTATATTTCAA  | GTCTGATAACTCGAATGACCTCAAC   |
| RGC5414c | HindIII | TTACTGCTGTATGTCATCCCCTAAT  | GCACCTTTGTACACCAAAAATAAAG   |
| RGC5417c | EcoRI   | TGTATGCTTCCGATGATACTAACCT  | TAATGGTGAGAGAGGTGGAGATAAG   |
| RGC5424c | PstI    | GGAGTCGATATGAGTCACTATGAAA  | CATAGACATGTTTGGGTTGTTGTTA   |
| RGC5428c | EcoRI   | ACATAAACGAAGTTTCATCCACTTG  | TTTGGACTCCCAACATAAGCTATTA   |
| RGC5431c | EcoRI   | GTGAGTCAGTGAGTGAATCTGTCA   | CACAAAAGGTATTGTTTCCAACCTC   |

|          |         |                            |                            |
|----------|---------|----------------------------|----------------------------|
| RGC5476c | Sall    | AACCTCACTACTTCATCACTGGAAG  | AACAAAAGAAGGTAATCCACAGAGA  |
| RGC5481c | Sacl    | ACGTCTCTCAGGTCTGTTATCAAAT  | ATACCCTCATCCTCTGAATCAAAT   |
| RGC54c   | HindIII | GAAGCAAACCAGACAGAACCTATTA  | GTGGTAATGGTTTTAAGTCAATG    |
| RGC5509c | EcoRI   | CCAATAATTAACGAATGCTTCTCTG  | TATTTGGGCTCACTTATGGAGTAGA  |
| RGC5522c | HindIII | GAAGGTGCTTCTACAGTTTTGTTA   | TCCGTCTTCATCTGAAATATTCTG   |
| RGC5530c | HindIII | GATGAATCTCAAGGTCATCTGCTAT  | TGGAGTATCCTATTGATGGTAGTGG  |
| RGC5561c | HindIII | TGCAGACACTCAATGAACTACTGAT  | CTTTCAGTGCTATACTCGTTTTCGT  |
| RGC5574c | XbaI    | AACTTTTACGACCTCAAACCTTCT   | AGTTAAACCAGTTTATTGCACCTT   |
| RGC5581c | Sacl    | ACGTCTCTCAGGTCTGTTATCAAAT  | ATACCCTCATCCTCTGAATCAAAT   |
| RGC5600c | HindIII | AGGCAATTTGAACGATATCCTCTAT  | CTGGTTTCTTTGAAGCAAGTCTAAA  |
| RGC560c  | Sacl    | ATCTCTTACCTACTTGGGTCTTCGT  | AGAGAGATCCAGAGAGACTAAATGC  |
| RGC5664c | EcoRI   | TTTCCGGTTTAGGTACTTTTTAAGG  | CCGAACGCAGAGTAGTAGAGAAGA   |
| RGC5676c | EcoRI   | GGAGTCGGATTATTTACTTCTGGTT  | ACGATAATCAGTTTTGAGCACAATC  |
| RGC5691c | EcoRI   | ACTTGACACAGATGACATTTGGATA  | AGTCAAGTCTACTTCAGCAAAGAA   |
| RGC5695c | HindIII | CCAAAGGAAATTCTATTGATGAGAG  | GTCAGAGTAGGTCTCTCCGTTGTA   |
| RGC5701c | HindIII | TGATGCATAAGTAACCAGCAAGATA  | AAGTAAGAAAGCTCCCACCTTTTCAT |
| RGC570c  | EcoRI   | ACTCTATCACGGACATTGTTTGATT  | CCTACAAAACATTCTCGCAGATTTA  |
| RGC5712c | EcoRI   | AAGCCTCTAGGTCTATGTTCCAGAGC | ATGAAACAAAATGAGTACTGGCTTG  |
| RGC5762c | Sall    | GCAAAACCAAGAACTTACAAATCTC  | GGAGATCATGTCTAAGAAGCTGTTC  |
| RGC5771c | EcoRI   | GCCTGTGATCAGCTTTTTATTTTCT  | ATGTTTTCTCTGTAGCAATGTCGTC  |
| RGC5774c | HindIII | AGTAGAACCCCAAAAAGACAAAAAC  | GAAACCCAAGATTGTGTAACCATAA  |
| RGC5793c | HindIII | TAGGGTAGAAAAGAAAGCATTGTCAC | CCTGAGATAGATTCCCACAAC TAGA |
| RGC5810c | XhoI    | GTCTCTCCAAATTCTCTACCAAAAA  | CAGATCAACGATGTAGGTAACCTCT  |
| RGC5894c | EcoRI   | CCAAAGCATCAATAGATCAGAAAAG  | TATCGTGACAACTTGAGATGCTTA   |
| RGC5898c | EcoRI   | ACGAATATGATTGGGTTAGTCTCAA  | CATATGTTTGGTTATCTTCGGATGT  |
| RGC591c  | EcoRI   | AGTGAGACACTGGTCTTTGATTTCT  | TGTAGACCACATACGAGTCTCCATA  |
| RGC5939c | HindIII | CTTGGCTTACCCTTACACTATCT    | TACCTGAGGTTCTTTGTCATTTGTT  |
| RGC5945c | BamH I  | TTCAGAACATTGAAGAAGAGATGGT  | CCCAACCTGAAGCTCTCTATAAAAT  |
| RGC5954c | PstI    | AGACCACAACGTTAACATTCAAGAT  | AACAACAACCTCTTCTTTCATTGAGC |
| RGC5970c | HindIII | ATATTTCTCTTCCGCTTTTTGTCTC  | TGCAAGGTACAACCTATCCCTAAAA  |
| RGC5978c | PstI    | GAGGTTTGTGTAGAGAAAGCTGAAG  | ACTTCACCTGATAACGCAAGAGTAT  |
| RGC6011c | XbaI    | TGTTTGGAGCTATTATATCGGTGAT  | AGCTTTGTGAGAATCTTATTGGATG  |
| RGC6032c | HindIII | TCTCTCCAGTTTCTTATCTTGAATG  | AGTTACCCCATAGAAGCAAGCTAGT  |
| RGC6034c | EcoRI   | AGACGGAGAATTAATATTGGTGTC   | ACGAGCAAACATGGCTATAACTTTT  |
| RGC6043c | XbaI    | GTTTCTCTCAAGCATTTCATCGAAC  | AGAGTTATCACATTTTGGTCGAGAT  |
| RGC6058c | EcoRI   | AGCTATGATGCGATTATTAAGCAGA  | CGCTAAACTATTTTCACTGAACCAG  |
| RGC607c  | HindIII | GGAGAGTATGATTCCCTTCTTTTCT  | AAGAAGCGTGAGAATATGAGTTTTG  |
| RGC6104c | EcoRI   | ATTTTCTTGTCTTACCCTCTTGG    | TAATGCAACTTCCAATTACCACTTC  |
| RGC6156c | EcoRI   | ACAATCAAAGCAAGACCTAGCAAT   | ATAGTGGCGATATTGATCTTGGATG  |
| RGC6170c | EcoRI   | GCAGATTTCTACAAACAAGGTGTCT  | TTGAGTTTTTCGTAGACTTTGGCTA  |
| RGC6178c | EcoRI   | CGAAACAGTTGAAGAGCAAGTTAAT  | GTTGACTAAATAAGCCACACGACTT  |
| RGC6186c | EcoRI   | GCTTCTGTATTCAATTTCTGGTATGG | CTAGCTTCAACAGGTAGCTCAAGTC  |
| RGC6220c | HindIII | ATCGAGATAATGGCAATCAAGAAAG  | CAAGGCACACTTAGTCAAAGGTAT   |
| RGC6279c | Sacl    | AAAGCAAAGTAGACGTATTCCACAC  | TTACCTAACAAATGAACGACTTAGCC |
| RGC6292c | EcoRI   | TAAAATCAAATTCGAGTTGGGAGAG  | ATGAGGTCTCGAAAGTTTATTGACA  |
| RGC629c  | EcoRI   | AGCTTCATGAATAACAAGTTTGGAG  | TAGGTGTATCACATGTTGTTTCCAG  |
| RGC6336c | HindIII | GTAGGTCGGAATCTATAAGCCAAGT  | ATGAGCTTGTGTATTTCTTGGATCC  |
| RGC6353c | XbaI    | TATCATCCTTTCAATTTCTGCTC    | ATCAATATGCCAAATGAGTACACTG  |
| RGC6359c | HindIII | ACATCCCAATATTCACCCTCTTTAT  | TAATCCTGATTCTGTCCGTTAAATGT |
| RGC6399c | XbaI    | TTGTCATCTAACGGAAGTCATAACA  | GATGGTGGTAAATCTGACAGAACC   |
| RGC6433c | HindIII | CCTTTGGAAACTAAACCGTGTACTA  | ATGGAGTACGTTCTTGATGTCTCTC  |

|          |         |                            |                             |
|----------|---------|----------------------------|-----------------------------|
| RGC6462c | PstI    | GAATAGCTGTCAGACTTTGGACTGT  | AGCTAGAACCATTCTCTGAAACTGA   |
| RGC6470c | EcoRI   | GGGTAAAAGGTTGCTGCTATTTAT   | AATACTTCAAAGGGCTATTGCTTCT   |
| RGC6477c | HindIII | CCATACTGTTTTGCAGTTCCTTAAA  | AATTTTCACTAGTCACACCCTGTT    |
| RGC6482c | HindIII | AGAAGCAAGCAAGAGAAATAGATGA  | GCCTTTTATGTTCCCTCAATTAGGTT  |
| RGC6519c | HindIII | AATCTCCTCGTCTCAGTATTTAGGG  | GATGTCGTCATAAAATTTTGGAGTG   |
| RGC6520c | EcoRI   | GAGTTGTCTGGTAGTTCACCTGTCT  | TTGATAGTTTTTCGGAAAAGTCATAGC |
| RGC6540c | HindIII | TCATAGGCTAAATTGAGGACAAAAG  | TGACTCTATAGCTTCCCATACCTTG   |
| RGC6547c | EcoRI   | GTGGATGAAGTTGATGGATAAGTTT  | ATCGTCTCAAAGTCCTTAACACTG    |
| RGC6603c | EcoRI   | TAAAACAAGGGATAACGCACTCTAC  | GGTTGGACCAATTATGCTTAAAAAC   |
| RGC662c  | EcoRI   | TGCACTCCTCATAGGTCAAATAGT   | TCGATGGAGACTTCACTTCTAACTC   |
| RGC6716c | EcoRI   | CAAATGATTTTAGGGCTAGTTCAGA  | ATCTCTGTAACAACCTCAACAGGAA   |
| RGC6719c | EcoRI   | CTTTCTATAGAGCGGGTTAACCTT   | GTTTCCAGTACACAACCTACCCTTTT  |
| RGC6745c | EcoRI   | GTAAAGTAGCAGGCTTTTCTCCAC   | TACAGGTCTTGAAATATTCGTTGGT   |
| RGC6748c | HindIII | GGATATAGGATTGGTTAAGCAAGGT  | GTGCAACCTAAGTACACAACAACAG   |
| RGC6749c | EcoRI   | TATGAGTGGCAAATATGTTTCATCC  | AAGGGATGTTATAAAAGGCAATAGG   |
| RGC674c  | HindIII | AGAGCAGAACAAGAGCTGAAAAGTA  | AACATGACGCTCTGTTTCTATCAAT   |
| RGC680c  | XbaI    | TCTCAAAGTCTTCCCTGTTTCATAG  | CTGTTAAAGTAACCAAAGACGGTGT   |
| RGC6821c | EcoRI   | CTCCTGCATTATAAGGAAAACAGAA  | AGTACCTTTTGAAATCCATCCACTT   |
| RGC683c  | EcoRI   | ACAGAGGCAATGTAATCATGAAATC  | TGAGCACCTATTTTGTCAAACACTT   |
| RGC684c  | EcoRI   | ATGTATCCTTGTCCTTATGTCCGTA  | ATTCCTCCTCCTTCCCTAGTAAAT    |
| RGC6858c | HindIII | AAATGATTTTGCAGCCTATGTAGAG  | AGTTGAAAGTCTTGAGCTCTTTGTG   |
| RGC6864c | HindIII | AAAGAATGTGCTATTGACCTTTTGG  | TGCTATCGGTAAAGTAGACAACCTCC  |
| RGC6866c | EcoRI   | ACCAGGATAGTTCCTGTGAGTTTCA  | AATGGGTGTGAAGTTGACCTAGTTA   |
| RGC6878c | HindIII | CTAATTCACAAACGTGTCAAACAAG  | CTAAGCCGACTACTCAGCCATAATA   |
| RGC6888c | HindIII | CTAATCAACAAAGCTAAGGATGGTG  | ATGTACCTGAGATAGGATGATTGGA   |
| RGC6897c | HindIII | ATTATTCCTCCTCGATCTTCTATGG  | AACTCTCTGAGGATGATGATTTTTG   |
| RGC6940c | EcoRI   | TGAGCAGATTCATTTAAACTGGTTG  | CTACTCTCCCTGCTCTGGAATTTAG   |
| RGC6949c | SacI    | GAAGAGTAGGAACGGGAGATAAGTC  | CTGCAATTTAGAAGCTAAAGCTAGG   |
| RGC6966c | EcoRI   | ATATTGATCTCGTGTAAAGTCGCAAA | AGAAAAGCGAGCTATTTTCAGGAATC  |
| RGC6994c | PstI    | CCATAGTGCAGTCCATCAAATATAA  | ATCATGTTTATGTTGAGGAAGTTGG   |
| RGC7029c | EcoRI   | TTATATACCTGCATGAGAACCCAGT  | GAGTATCAACTGGTTGGTTGTTTTC   |
| RGC7030c | EcoRI   | ATTAACCGGAGGAACAAACTTAAAC  | GTTGCTAATACTGTTGTTGCTGTTG   |
| RGC7035c | EcoRI   | TAGCTACGTAATGATGCTTTTACCC  | TGAAGTTTTCGTTACACTTACCACA   |
| RGC7054c | XhoI    | ATTCCTTCTACCTTAGGAAACCTCA  | GGAACCTGTTGTTGCTTAGATCAAT   |
| RGC7108c | EcoRI   | ATAGGCAGACAGGAAACATAATTCA  | GTTGTGAACTCATAAGAAGCAACCT   |
| RGC7124c | EcoRI   | CATGTGACCCGTAATACTTTGAGAA  | TTGCTATTTAGCTGGAGAAATGAAG   |
| RGC7132c | EcoRI   | AAGAATCTGGTGAGTTAATGCTGTC  | ATAAAAGGTACGAAACACGATACGA   |
| RGC7139c | EcoRI   | GTTGTTGGACCGTACCTATACAAAA  | GAAGGAGAAGCAGATATTGTGGTTA   |
| RGC7156c | BamH I  | ATCTCATGCTGTGTTGTGTCATAT   | CCGAGTTTACTAGACCGGTTATTTT   |
| RGC7157c | EcoRI   | AGTTGCTGATTAAGTGTTCGTCAT   | GATTAGAATCTTCAAACCCATGTTG   |
| RGC715c  | EcoRI   | CCTATTTGGGTTCTACAATCATTTG  | AAAACCCTGCTCCAATAGAATTTAC   |
| RGC7168c | EcoRI   | ATCTAATGACCAAAAAGGTTTAAACA | CATGTTTTTAAACCTCTCACCATCT   |
| RGC7232c | HindIII | CCAAAGGGTGACCAAACTATAAAAA  | CGGAAACGAGAAGATAATAGATGAA   |
| RGC7238c | HindIII | TGGACAAGAAGGTAACCCACATAA   | TCCGAACCAACTGTAGAATGTAATC   |
| RGC7277c | EcoRI   | CCACAGATTAGTGTAGTTTACGGTC  | AGAGCAAATATAACAGCAACCCATGA  |
| RGC7282c | HindIII | AAGGATATAAAAGAAAGGGACCACA  | CATTCTCAGTTTCATCTTCTTCCAT   |
| RGC7305c | PstI    | CGGTAACATTTAATCCCTGTTCTAA  | ACTAAAGATCACATGGTGAAGTGGT   |
| RGC7341c | HindIII | CATCCTAGAAACAAGGTTCAACAGT  | AGCAAAGGTTAGATTATCGAGTGA    |
| RGC7374c | EcoRI   | CTAAGTCACAGTTTTCAGTTCCCAAC | GGTCAGGAGTAAAGGAGAAGAGAGA   |
| RGC7411c | EcoRI   | CTTGATTTCCATTCTCAGCTTCAC   | CGCAACTACTAAGGCTAACGTTTTT   |
| RGC7441c | EcoRI   | CTTAATTGCCACATCCCATATTTAC  | AAATAATATGGCCTTCTAAGCCAAG   |



|          |         |                            |                            |
|----------|---------|----------------------------|----------------------------|
| RGC7444c | HindIII | GGAGGCTGAAGTACACAGAAAAATA  | ATAGGGATCTCCAAACACATAGACA  |
| RGC7461c | EcoRI   | AGCAGCTTTAGATTCAACCCTACTT  | AGTGGTGTCTCTAGTCAATCCAAAG  |
| RGC7478c | XhoI    | AACGACAATTAGTGTTTTAGGCAAC  | ATCGGACACATGAGAGTTTTATGAT  |
| RGC7515c | HindIII | TCCTTGGTAAGTACATGGTCTGTTT  | GATGTGGTAAGAGAAAAGCAACATCT |
| RGC7548c | EcoRI   | TTCCAGCTTCAAGTTTTGTCTGATA  | GTTGGAGATCATTATGTTTTGGTC   |
| RGC7607c | EcoRI   | AAAGATGAGCAGACCTGACAGTATC  | CTTCTCTCTCACCACACACTCTCT   |
| RGC7617c | EcoRI   | GTAATGGACCAAACACAATACGAGT  | GATGACTATGTTCTGGTCTTGAAGG  |
| RGC7717c | HindIII | CTTCTCAGAGCTGTTCAAGGTAAAG  | TTGAAGACACCAATGATAACAGAGA  |
| RGC7718c | HindIII | TCTTTGAGAGTGAGACATCACTACG  | ATCTGGCAGAATACAGGATACAAAG  |
| RGC7750c | PstI    | GCTGAAAACCTGTACAAGGTAGGTA  | CCTCCTACTAAACCACTACCAAACA  |
| RGC7757c | HindIII | AAAGGGAGAAGACACTCTCTGAAAT  | GTTTTGAGTGAGAAGAGAGAGGTTG  |
| RGC7796c | HindIII | GTTGGAGGGTAAACACAAAGTTCTC  | TTTGAAGCTTTTCTGCAGTCTTACT  |
| RGC7805c | SacI    | TTGTGGAGAAGAATAGTGACATTGA  | TAAATGGATCATCTAGCCTCATACC  |
| RGC7838c | EcoRI   | GGAAAGTCTGTCATCAGTTCTTGTT  | GTGTTGAAGCTAAGGACATTGATCT  |
| RGC7851c | HindIII | GTTTCGACTTTGGAAGTTTGTATTTG | AGTTATCGAGTGGGAAGAACTTTG   |
| RGC7876c | HindIII | TGCAATTATTTTCCAGGAAGTAGAG  | AATTGGAAAGGCTGTAGTAAGTTCC  |
| RGC7922c | HindIII | AAGGAGCTTTTGGTTCTTTAGGTTA  | AACATCCAACATTGTCTCCATAAAC  |
| RGC793c  | HindIII | ATCCACATAACAAGGAGGTCTACAA  | GATTTCTCAAGCTCATCTGTGTTTT  |
| RGC7955c | HindIII | TAAGTTATTTGTCCCTTCTGATTCC  | TGTTTTCAGCTTTTGTGATGTATTC  |
| RGC7958c | EcoRI   | GATACGAAGTTGCATAAACGAACAT  | TTGTAAACATTTATACCGCGTATGG  |
| RGC7982c | PstI    | CATTTCTTTGAACAGATCTTCCATC  | GTTAAACCCTTGTCTAGTGTCTGT   |
| RGC801c  | HindIII | CTGGTTCATGTATCCAGGCTTATAG  | TCTCTAATTTGCGAAACTCTTATGG  |
| RGC8038c | HindIII | GTTTCTCTCTAACAGTGCAGTTTCC  | GAACCGTATCTAATCTTCAAGTCCA  |
| RGC8082c | HindIII | GTTTTAACAATTCTCCCATCAACAC  | AGAAGAAAAGAAGGCCGTTTAAGTA  |
| RGC8128c | EcoRI   | AGGATGTCTTGATCCAGTCAGATAC  | GCTTGTTAGTAGTGGAACGGATTTA  |
| RGC8188c | XhoI    | GGTATATCAGCTATTTTGTGCCATT  | TAGTTTTATTGCTCTGGTTTTCCACC |
| RGC820c  | HindIII | ACCGGTAAGTACCCATTTAACTTTC  | AGACAGAGGAGAGACTGTTCTCAA   |
| RGC8225c | EcoRI   | AAAACCAACTCTGATTTTGGCATAAC | TCAACCGTACCTAAATTCATCTCTC  |
| RGC8228c | HindIII | GTTACTTGTGAGCTGGTGATAATCC  | AGTGTAAGTGCCTGTTTTATGTGCT  |
| RGC8280c | SacI    | GGTTTCTTGACAGCCAAGTTATTAG  | AGTTCAATGGGAAAAGGAAACTATC  |
| RGC8307c | EcoRI   | GATTTTGTGGTTTAAATGGTACTGGA | GCAGTCTAGCACCATATTCTCAGTT  |
| RGC8308c | EcoRI   | TCGTAACTACTCCCACAACCTCTAA  | AGCTTGCAATCAGTCAATCAATATG  |
| RGC8374c | HindIII | TAGTTTTCTCAAATTCACAGAAGG   | GTTTAGATTACTGATGCTGTGATGG  |
| RGC8396c | HindIII | CGTGAACAGAGAATACTAAGCACCT  | TTTTGATTCATCTCGTTCTAGTTCC  |
| RGC8422c | EcoRI   | CATCTTTGAATCCAGTTCTCACTTT  | CTTCAAAAAGTGTCCCAAACATTTAC |
| RGC8507c | HindIII | GGTTTTATATAAGGGAAAGGGGAAA  | CCGTACTTTGAAAAACACTCAATTC  |
| RGC8508c | SacI    | GTATGACCAATCGTAAACCGTAAAT  | CAAACCTTCAATTACACTCCAAACC  |
| RGC8546c | HindIII | TGTTTGTACAGATGGTAGAATACGC  | CAGTCTTCTCTGTCATCTTCTCCTC  |
| RGC8553c | XbaI    | CTTTGATAGGTATAAGCCAGGATCA  | GGACTAAAGGTGATAGCCATAGGAT  |
| RGC8563c | EcoRI   | AATGCCTCATGATGTATAGGGTAAG  | TGAAACGGTATAGAAGGAGAATGAC  |
| RGC8606c | SacI    | ATAGCTATAGCAACAAGCCCGTCTA  | CAGGTCCATAATTAGACAAAACGAC  |
| RGC8634c | EcoRI   | AGATAGTTGCTCCTTATGAGCCTTT  | CTAAGAGTAGGAATCCCGGTTAGT   |
| RGC8651c | EcoRI   | CGGTTAAATGCTGTTATATTTCTGG  | GATCTCATGTCATTCCAGACCAAGT  |
| RGC8742c | HindIII | ACAGTGACATACATGACCTGCTAGA  | GCTCTATGCCACGTTAGAAAAATAA  |
| RGC8830c | EcoRI   | ATGACCTGATATAAAAGCTGTCCAA  | GCTTCTCTTGAAGAAGTTAATCTCG  |
| RGC8839c | HindIII | AACGAATCAAATCACAATAGCTCTC  | AGGATGAATTCTAGGGTTCTTGTTT  |
| RGC8845c | HindIII | CTGAGAGAAATATGGTTTCTTGGAA  | AACTCTTCAACCATCAGAGCATAGT  |
| RGC8853c | HindIII | ATTGCCAATAGTGATCTCTTCGTTA  | TTCAGAACTAAAGACTGTGCAGGAT  |
| RGC8873c | EcoRI   | TGCTATCTTGGTCTCTTGAAGAAGT  | ACTACATAAGGTTGTTGGTGATGT   |
| RGC8922c | XbaI    | AGAAAGGAGCCGATCATATATCTTT  | ACAATCAGTAAAAGTTTTGCAGCTCT |
| RGC893c  | XbaI    | TGAGTGATTCTCCTGTTCTTCACTA  | TGGGTTTCAATCTTATCTCATATC   |

|          |         |                            |                            |
|----------|---------|----------------------------|----------------------------|
| RGC897c  | EcoRI   | CGAAACATATGAAGGATTAAGACGA  | ACACAGAACTGGTACAATTGGAAT   |
| RGC8995c | EcoRI   | CATATATGTGCATTGGGAAAATCTC  | CATATCCCTTGATGATCTGCAAAA   |
| RGC9028c | EcoRI   | ATAAGAATCCCATAGAAAGACCAG   | AGTTGTCTTCCCTTTTAATTCTTCG  |
| RGC9047c | HindIII | GAAGTTTAGTGTTCAGTGG        | CACCTAACATATTCAAGCACACAAG  |
| RGC9063c | EcoRI   | TGAAGGAGGGAGAGAGAGTGTATAA  | CAAAAAGCATGTGTAGCTTCCTAGT  |
| RGC9070c | EcoRI   | AATGACTGCAAGATATGGTTATTCG  | TTGGTTTAGAAGCATATAGTGGGTA  |
| RGC908c  | EcoRI   | CAGCTGGTAAGTCATATGTGTTTTG  | CTGTCATCCTTGAAAATATACACC   |
| RGC9094c | HindIII | CTCATTGAAACAAAACCTGAAAGAC  | TATGGCTTCGAGTCTTTGAATTAGA  |
| RGC9137c | HindIII | GCACAAGACTAGAACAAGATGGT    | TTATAACAACGTGGAGGAGGTGTAT  |
| RGC916c  | XbaI    | TACTACAAGAATGGTCTGTGACGAA  | CAACATTTGTTCTGTGACATTAGC   |
| RGC9187c | PstI    | AAACTCTCACACTGAAAACACCAAT  | GTGACCTCTATGGATTTGTGAACT   |
| RGC9198c | EcoRI   | AAAGCTGAAGTTAAGAACAGAGCAA  | TTCTTCCTATCTTCGGTTAAGGAAA  |
| RGC9240c | EcoRI   | GTCTAAATGAAGGAGAGATGGTGAA  | TAATTCACAGTCAAAGTGGGTTTCT  |
| RGC9253c | HindIII | ATAGGATATGGCATGCTAATAACGA  | AATGCCAGACTCTTTCTACATTAC   |
| RGC9298c | HindIII | TCGGGTAGATCGTAGAAGTAGATCA  | TCCAATATACCCTCCAGTTATCTT   |
| RGC9306c | SacI    | GAGAATCTCCTTTGTTATCATCGAA  | CAACCCACTATACACAGTGAAGCTA  |
| RGC9315c | HindIII | TATGAAGGAAAACATAACCATGACC  | ACAAACCAAAGCAAGTAGGTCAATA  |
| RGC9337c | EcoRI   | CTTATCCTTGTTCTTTCTGGACAT   | TTTATACTTCCGGTTCACCTTCTCC  |
| RGC9339c | XbaI    | TCATGAGAGGCTTAGGGATTATAGA  | CTAAACAAGGGACTGAACTGACCTA  |
| RGC9371c | EcoRI   | ACAGCAGTGATATTGGTTTTACCAT  | GTGATGATTTTATGAAGTGGACACA  |
| RGC9387c | EcoRI   | GACAGCAAATAAAAAGTCTTCGTGT  | AGGTGAAGAATTGGTGTTAATGAGA  |
| RGC9390c | HindIII | AAGTAGCCAGAGTCTCTTCTTCGAT  | ACTCCAAATTCGTTTCTCTTTACC   |
| RGC9409c | EcoRI   | AACGTGGAGATGAAATACAATGAGT  | GTGTTTTGTTCTGTGTCTCTGTCTG  |
| RGC9453c | EcoRI   | GCGGTAGAAGTACCTACAGTGATGT  | TTCTCATTTACGATTACTCACTCA   |
| RGC948c  | EcoRI   | GGAGCTATTAATGATTTGGGTTTT   | CTGAGAAAGAGATTGTCCATGAATC  |
| RGC9493c | HindIII | TAAGAGAATATGCATGGCGATTAAG  | GATCCTTCATCCATTTTGTCTCA    |
| RGC9543c | EcoRI   | GCATGGTCTGATATTTCTACTGGTT  | TTTATTGGTCAGAGAAGGTTGTTGT  |
| RGC9577c | EcoRI   | AGCACTAATCTCTTGCATCTCAACT  | TTTATCCTCTGGTGAACAAAGTTTC  |
| RGC9615c | PstI    | GAGTTTTCAGATTTGAGCGTAAGAC  | GAGCTTACAAGTTCAGTGATTGAT   |
| RGC9621c | EcoRI   | ACTGATTATTTGAACTGGTTGTGGT  | CAAGTAAGTTCTAATCTCGCCTGAG  |
| RGC9697c | EcoRI   | AACCAAGTGAACCTTTGGTGATAAA  | GAGCCATCCTATAAAATTCATGTTT  |
| RGC9723c | EcoRI   | ACGAATTAACCCTAAAATCTGGTC   | AGAAGCTCCTTTGATTCTTTATGT   |
| RGC9763c | HindIII | GTCCCTTATAACCTCTGGTCTCAAT  | ATACCAGAGTGGCACAACAATAAT   |
| RGC9765c | HindIII | ATGCAGATGAAAAGTGAATAGAGG   | GCGTGTTCCAGATATGTCAAAAATTC |
| RGC9800c | XhoI    | CGCAAATCCGACGAGTATTATTTAT  | TTCTTGCAATCTAAGGGATTCATAG  |
| RGC9843c | SacI    | TCCTCAACTACATTCGATTACAACA  | GTGGTGGATACAGCTCAAACCTATCT |
| RGC9866c | EcoRI   | TGTCTTTATGATAGGGGAAATGTA   | ATGTGTAAAAGATGTAGCCCTTGAG  |
| RGC9878c | XbaI    | GCTGAAAAAGATCTTACAGAAGCAC  | TAGATCCCAACACCGTTCTATGTAT  |
| RGC989c  | EcoRI   | CGAGATAATAAACATTCGGTTCTTG  | GGATCATTTTATAAGTCAACCGATG  |
| RGC9973c | EcoRI   | ATAGAAAACCTCGACAGAGACCTTCC | GAGAGAAGTTGAGGATGACTTGAGA  |
| RGC9986c | EcoRI   | TCCTGCTTTAACCATAGATGTTTGT  | GAGAGAGTTTGCAAGACATACCATT  |
| RGC9998c | EcoRI   | GTGCAAATGGTCTCTTGTCTACT    | TGGTGTTAAAACAGTGGAGGTACAA  |

Table S14 Integrated linkage map

| Linkage group | Marker loci | Position (cM) | Homologous gene in <i>B.rapa</i> |                    | Synteny region (SR) |
|---------------|-------------|---------------|----------------------------------|--------------------|---------------------|
|               |             |               | Gene ID                          | Gene position (Mb) |                     |
| R1            | RGA2415s    | 0             | Bra011173                        | A01-3.498          |                     |
| R1            | RGC19516c   | 0.68          |                                  |                    |                     |
| R1            | RS2CL672s   | 5.4           | Bra015547                        | A10-0.658          | 1                   |
| R1            | RS2CL6084s  | 6.61          | Bra015472                        | A10-1.097          | 1                   |
| R1            | RS2CL7513s  | 7.64          | Bra033215                        | A10-3.502          | 1                   |
| R1            | Rs2CL1500s  | 7.86          | Bra032628                        | A09-38.681         | 1                   |
| R1            | RS2CL1784s  | 8.15          | Bra033287                        | A10-3.142          | 1                   |
| R1            | RS2CL5805s  | 8.3           | Bra033283                        | A10-3.151          | 1                   |
| R1            | RS2CL4624s  | 8.57          | Bra033337                        | A10-2.806          | 1                   |
| R1            | RS2CL5888s  | 9.37          | Bra015297                        | A10-2.137          | 1                   |
| R1            | RGC14676c   | 9.78          | Bra015431                        | A10-1.333          | 1                   |
| R1            | RS2CL841s   | 9.99          | Bra015367                        | A10-1.778          | 1                   |
| R1            | RS2CL6024s  | 10.66         | Bra015515                        | A10-0.83           | 1                   |
| R1            | RS2CL6172s  | 10.88         | Bra015548                        | A10-0.654          | 1                   |
| R1            | RS2CL5895s  | 11.05         | Bra015499                        | A10-0.906          | 1                   |
| R1            | RS2CL4654s  | 11.89         | Bra022662                        | A02-7.161          |                     |
| R1            | RSS3298     | 12.45         | Bra018674                        | A06-2.693          |                     |
| R1            | CB62        | 15.15         |                                  |                    |                     |
| R1            | Rs2CL1672s  | 15.78         | Bra020022                        | A06-3.246          |                     |
| R1            | RSS1309     | 16.39         | Bra033367                        | A10-2.69           |                     |
| R1            | RGC20489c   | 16.99         |                                  |                    |                     |
| R1            | RSS2487     | 17.02         | Bra033408                        | A10-2.469          |                     |
| R1            | RS2CL4157s  | 17.05         | Bra031701                        | A09-36.925         |                     |
| R1            | RS2CL6482s  | 18.07         | Bra019938                        | A06-3.6            |                     |
| R1            | Rs2CL2045s  | 18.34         | Bra019956                        | A06-3.531          |                     |
| R1            | RSS2037     | 18.71         | Bra030629                        | A08-20.247         |                     |
| R1            | Rs2CL2348s  | 19.35         | Bra016757                        | A08-19.054         |                     |
| R1            | RSS0755     | 19.41         | Bra015469                        | A10-1.116          |                     |
| R1            | RS2CL6151s  | 19.97         | Bra019875                        | A06-3.933          | 2                   |
| R1            | RGB7078c    | 20.98         |                                  |                    | 2                   |
| R1            | RS2CL6126s  | 21.21         | Bra019720                        | A06-4.802          | 2                   |
| R1            | OPE20Ha     | 21.39         |                                  |                    | 2                   |
| R1            | RS2CL895s   | 21.97         | Bra019792                        | A06-4.398          | 2                   |
| R1            | RGA1821s    | 22.51         |                                  |                    | 2                   |
| R1            | CC67aH      | 22.94         |                                  |                    | 2                   |
| R1            | RGC1996c    | 22.96         |                                  |                    | 2                   |
| R1            | RSS3090     | 25.32         | Bra019853                        | A06-4.02           | 2                   |
| R1            | RSS2047     | 29.92         | Bra026838                        | A09-35.687         | 2                   |
| R1            | RGC1509c    | 30.59         |                                  |                    | 2                   |
| R1            | RGC6821c    | 30.59         |                                  |                    | 2                   |
| R1            | RS2CL7575s  | 30.89         | Bra026222                        | A06-5.209          | 2                   |
| R1            | RSS0938     | 30.91         | Bra026186                        | A06-5.395          | 2                   |

|    |            |       |           |            |   |
|----|------------|-------|-----------|------------|---|
| R1 | RSS3778    | 31.31 | Bra026167 | A06-5.488  | 2 |
| R1 | RGA2384s   | 32.66 | Bra026010 | A06-6.237  | 2 |
| R1 | RS2CL7786s | 32.99 | Bra026099 | A06-5.857  | 2 |
| R1 | RS2CL5804s | 33.35 | Bra026110 | A06-5.769  | 2 |
| R1 | RS2CL4651s | 34    | Bra025982 | A06-6.351  | 2 |
| R1 | RS2CL5128s | 34.14 | Bra025994 | A06-6.302  | 2 |
| R1 | RS2CL7214s | 34.53 | Bra026085 | A06-5.908  | 2 |
| R1 | RS2CL6905s | 34.74 | Bra026062 | A06-5.99   | 2 |
| R1 | RS2CL6317s | 35.31 | Bra026046 | A06-6.058  | 2 |
| R1 | RS2CL5226s | 36.21 | Bra025939 | A06-6.576  | 2 |
| R1 | RGA2190s   | 37.05 |           |            | 2 |
| R1 | RGC6748c   | 37.13 | Bra026031 | A06-6.137  | 2 |
| R1 | RGA2261s   | 37.39 | Bra025920 | A06-6.693  | 2 |
| R1 | RS2CL2084s | 37.59 | Bra025919 | A06-6.704  | 2 |
| R1 | RGA2423s   | 38.18 |           |            | 2 |
| R1 | RGC3130c   | 38.24 |           |            | 2 |
| R1 | RGC11798c  | 38.54 | Bra026127 | A06-5.652  | 2 |
| R1 | RGC18142c  | 38.54 |           |            | 2 |
| R1 | RGC9409c   | 38.54 |           |            | 2 |
| R1 | RGC2192c   | 39.98 | Bra025690 | A06-7.026  | 2 |
| R1 | RGC23031c  | 39.98 |           |            | 2 |
| R1 | RGC5476c   | 39.98 | Bra025937 | A06-6.583  | 2 |
| R1 | RSS0987    | 40.32 | Bra025719 | A06-7.172  | 2 |
| R1 | RSS1811    | 41.12 | Bra025804 | A06-7.799  | 2 |
| R1 | RGC13289c  | 41.33 |           |            | 2 |
| R1 | RGC6011c   | 41.33 | Bra025769 | A06-7.5    | 2 |
| R1 | RS2CL4282s | 41.98 | Bra025798 | A06-7.776  | 2 |
| R1 | RSS2736    | 42.7  | Bra017911 | A06-8.51   |   |
| R1 | RGC6858c   | 43.24 | Bra024709 | A09-24.618 | 3 |
| R1 | RGB9500c   | 44.09 | Bra024635 | A09-25.121 | 3 |
| R1 | RGC453c    | 44.55 |           |            | 3 |
| R1 | RGB7310c   | 44.55 |           |            | 3 |
| R1 | RGC12216c  | 45.06 |           |            | 3 |
| R1 | OPE20b     | 45.24 |           |            | 3 |
| R1 | RS2CL2578s | 45.38 | Bra025873 | A06-8.335  | 3 |
| R1 | RSS2094    | 45.53 | Bra031364 | A09-26.126 | 3 |
| R1 | RS2CL2020s | 46.15 | Bra031370 | A09-26.077 | 3 |
| R1 | CB28       | 46.91 |           |            | 3 |
| R1 | RS2CL5101s | 47.07 | Bra016401 | A08-17.511 | 3 |
| R1 | RS2CL2643s | 47.2  | Bra024542 | A09-25.732 | 3 |
| R1 | RS2CL3579s | 47.2  | Bra024559 | A09-25.636 | 3 |
| R1 | RSS1945    | 47.4  | Bra024542 | A09-25.732 | 3 |
| R1 | RSS3875    | 47.5  | Bra024537 | A09-25.754 | 3 |
| R1 | RS2CL5231s | 47.52 | Bra031387 | A09-25.973 | 3 |
| R1 | RS2CL4686s | 48.3  | Bra024547 | A09-25.699 | 3 |
| R1 | RSS2326    | 48.67 | Bra040067 | A08-12.415 | 3 |

|    |            |       |           |                      |   |
|----|------------|-------|-----------|----------------------|---|
| R1 | Pgm        | 48.77 |           |                      | 3 |
| R1 | RGC3295c   | 49.44 | Bra024687 | A09-24.715           | 3 |
| R1 | RGA2466s   | 50.02 |           |                      | 3 |
| R1 | CC11       | 50.93 |           |                      | 3 |
| R1 | RS2CL7272s | 50.99 | Bra031377 | A09-26.029           | 3 |
| R1 | RGC14226c  | 51.66 |           |                      | 3 |
| R1 | RS2CL7240s | 52.01 | Bra024659 | A09-24.975           | 3 |
| R1 | RS2CL7289s | 53.29 | Bra024686 | A09-24.743           | 3 |
| R1 | RGC13028c  | 53.92 | Bra024722 | A09-24.558           | 3 |
| R1 | RS2CL3783s | 54.59 | Bra024724 | A09-24.546           | 3 |
| R1 | RS2CL8267s | 55.77 | Bra024665 | A09-24.939           | 3 |
| R1 | RGC14293c  | 56.66 |           |                      | 3 |
| R1 | RGB1137c   | 58.06 | Bra032807 | A09-23.829           | 3 |
| R1 | RGC18589c  | 58.06 | Bra032847 | A09-23.599           | 3 |
| R1 | RSS0325    | 59.29 | Bra024735 | A09-24.451           | 3 |
| R1 | RSS4011    | 59.79 | Bra023199 | A09-20.875           | 3 |
| R1 | RS2CL7006s | 61.13 | Bra032859 | A09-23.52            | 3 |
| R1 | RGC15930c  | 61.77 | Bra026040 | A06-6.09             | 3 |
| R1 | RGC3696c   | 62.07 |           |                      | 3 |
| R1 | RS2CL7647s | 62.83 | Bra032873 | A09-23.409           | 3 |
| R1 | RGC11904c  | 63.88 | Bra032856 | A09-23.545           | 3 |
| R1 | RGC7796c   | 63.88 | Bra032883 | A09-23.312           | 3 |
| R1 | RS2CL4233s | 64.51 |           |                      | 3 |
| R1 | RGC12943c  | 64.75 |           |                      | 3 |
| R1 | RGC15280c  | 64.75 |           |                      | 3 |
| R1 | RS2CL7501s | 65.71 | Bra032368 | A09-22.176           | 3 |
| R1 | RS2CL5860s | 66.58 | Bra010776 | A08-15.605           | 3 |
| R1 | RSS2045    | 66.67 | Bra032310 | A09-22.702           | 3 |
| R1 | RSS2843    | 66.67 | Bra032316 | A09-22.665           | 3 |
| R1 | RSS3638    | 66.67 | Bra010829 | A08-15.894           | 3 |
| R1 | RGC14452c  | 68.11 |           |                      | 3 |
| R1 | RSS0679    | 68.37 | Bra032396 | A09-21.823           | 3 |
| R1 | RGB2900c   | 68.82 | Bra026838 | A09-35.687           | 3 |
| R1 | RSS0442    | 69.17 | Bra032364 | A09-22.198           | 3 |
| R1 | RSS0913    | 71.47 | Bra033662 | A06-24.692           | 3 |
| R1 | RS2CL2130s | 71.65 | Bra023176 | A09-21.038           | 3 |
| R1 | RSS3818    | 72.83 |           |                      | 3 |
| R1 | Rs2CL1826s | 72.89 | Bra008122 | A02-12.257           | 3 |
| R1 | RGC897c    | 73.47 |           |                      | 3 |
| R1 | RGC20779c  | 74.35 |           |                      | 3 |
| R1 | RGB3655c   | 75.57 |           |                      | 3 |
| R1 | RGB1443c   | 76.34 | Bra028651 | A02-1.311            | 3 |
| R1 | RS2CL7691s | 76.63 | Bra023306 | A09-19.748           | 3 |
| R1 | RSS0997    | 77.39 | Bra036948 | Scaffold000123-0.259 | 3 |
| R1 | RGC23207c  | 77.65 |           |                      | 3 |
| R1 | RGC4403c   | 77.65 |           |                      | 3 |

|    |            |       |           |                      |   |
|----|------------|-------|-----------|----------------------|---|
| R1 | RGC715c    | 77.65 |           |                      | 3 |
| R1 | RS2CL8104s | 78.05 | Bra028013 | A09-19.437           | 3 |
| R1 | RSS0923    | 78.13 | Bra040009 | Scaffold000185-0.133 | 3 |
| R1 | RS2CL5132s | 78.61 | Bra028004 | A09-19.545           | 3 |
| R1 | RS2CL1854s | 78.75 | Bra028012 | A09-19.447           | 3 |
| R1 | RSS1995    | 79.15 |           |                      | 3 |
| R1 | RGC1879c   | 79.18 |           |                      | 3 |
| R1 | RS2CL5940s | 79.53 | Bra026107 | A06-5.79             | 3 |
| R1 | RS2CL7378s | 79.58 | Bra028046 | A09-19.094           | 3 |
| R1 | RGC15296c  | 79.98 | Bra036965 | Scaffold000123-0.509 | 3 |
| R1 | RSS2552    | 80.3  | Bra028057 | A09-18.975           | 3 |
| R1 | RS2CL5546s | 80.93 | Bra018735 | A06-2.268            |   |
| R1 | RSS1912    | 81    | Bra015610 | A10-0.175            |   |
| R1 | RGC6603c   | 81.24 |           |                      |   |
| R1 | RS2CL1420s | 81.55 | Bra037299 | A09-5.071            |   |
| R1 | RGC1871c   | 81.98 | Bra040749 | Scaffold000249-0.015 |   |
| R1 | RS2CL7231s | 82.45 | Bra040753 | Scaffold000249-0.037 |   |
| R1 | CC60H      | 82.7  |           |                      |   |
| R1 | RS2CL996s  | 82.92 | Bra040955 | Scaffold000337-0.006 |   |
| R1 | RGB10948c  | 83.21 |           |                      |   |
| R1 | RGC32005c  | 83.73 | Bra018866 | A06-1.539            | 4 |
| R1 | RGC4062c   | 83.73 |           |                      | 4 |
| R1 | RGC4642c   | 83.73 | Bra018906 | A06-1.34             | 4 |
| R1 | RGC9187c   | 84.21 | Bra015613 | A10-0.125            | 4 |
| R1 | RSS1252    | 84.4  | Bra006164 | A03-2.312            | 4 |
| R1 | RGC3063c   | 85.17 | Bra018885 | A06-1.445            | 4 |
| R1 | RGC1234c   | 85.32 | Bra018872 | A06-1.513            | 4 |
| R1 | RSS1998    | 85.8  | Bra037273 | A09-5.231            | 4 |
| R1 | RS2CL6354s | 85.86 | Bra018932 | A06-1.19             | 4 |
| R1 | RSS0430    | 86    | Bra018860 | A06-1.585            | 4 |
| R1 | RS2CL2122s | 86.08 | Bra030419 | A05-11.191           | 4 |
| R1 | RGC6043c   | 86.3  | Bra018979 | A06-0.918            | 4 |
| R1 | RS2CL4281s | 86.63 | Bra019002 | A06-0.813            | 4 |
| R1 | RS2CL5593s | 87.28 | Bra019013 | A06-0.771            | 4 |
| R1 | RGC3820c   | 87.88 | Bra037970 | A06-0.361            | 4 |
| R1 | RSS0471    | 87.9  | Bra018964 | A06-1.005            | 4 |
| R1 | RGC3016c   | 88    | Bra037994 | A06-0.24             | 4 |
| R1 | RSS2516    | 88.4  | Bra022927 | A03-7.813            |   |
| R1 | RSS3378    | 88.4  | Bra041018 | Scaffold000383-0.003 |   |
| R1 | Rs2CL2428s | 89    | Bra028015 | A09-19.419           |   |
| R1 | RSS0925    | 89.9  | Bra037969 | A06-0.365            |   |
| R1 | RSS2494    | 90.7  | Bra040781 | Scaffold000257-0.009 |   |
| R1 | RSS3402    | 90.7  | Bra040781 | Scaffold000257-0.009 |   |
| R1 | CC89H      | 91.4  |           |                      |   |
| R1 | RSS0496    | 95.7  | Bra037966 | A06-0.376            |   |

|    |            |       |           |            |   |
|----|------------|-------|-----------|------------|---|
| R2 | RSS3197    | 0     | Bra011256 | A01-3.057  |   |
| R2 | RGC2914c   | 1.88  |           |            |   |
| R2 | CA41N      | 4.3   |           |            |   |
| R2 | RGC12735c  | 6.75  | Bra011588 | A01-1.531  |   |
| R2 | RS2CL8380s | 8.75  | Bra030055 | A07-9.162  |   |
| R2 | RGB8387c   | 9.56  | Bra034641 | A08-11.537 |   |
| R2 | RS2CL1172s | 10.39 | Bra037884 | A09-15.742 |   |
| R2 | CA41       | 10.9  |           |            |   |
| R2 | RS2CL6266s | 10.92 | Bra011519 | A01-1.846  | 5 |
| R2 | CD57H      | 11.1  |           |            | 5 |
| R2 | RSS0368    | 12    | Bra011744 | A01-0.776  | 5 |
| R2 | RGC9800c   | 12.25 |           |            | 5 |
| R2 | RSS2503    | 12.9  | Bra013783 | A01-7.747  | 5 |
| R2 | RSS3053    | 12.9  | Bra011830 | A01-0.331  | 5 |
| R2 | RSS3449    | 12.9  | Bra011776 | A01-0.608  | 5 |
| R2 | RSS1595    | 13    | Bra011839 | A01-0.279  | 5 |
| R2 | RSS0251    | 13.1  | Bra011808 | A01-0.421  | 5 |
| R2 | RSS0845    | 13.1  | Bra011833 | A01-0.316  | 5 |
| R2 | RSS1374    | 13.1  | Bra011813 | A01-0.406  | 5 |
| R2 | RSS0073_a  | 13.2  | Bra010632 | A08-14.92  | 5 |
| R2 | RS2CL986s  | 13.61 | Bra011843 | A01-0.264  | 5 |
| R2 | RGC15346c  | 13.81 | Bra011784 | A01-0.553  | 5 |
| R2 | RS2CL2676s | 14.27 | Bra033012 | A02-22.161 | 5 |
| R2 | RGC9253c   | 14.68 | Bra011410 | A01-2.288  | 5 |
| R2 | RS2CL2351s | 15.12 | Bra011545 | A01-1.74   | 5 |
| R2 | RS2CL6213s | 15.6  | Bra011537 | A01-1.782  | 5 |
| R2 | RSS1442    | 15.7  | Bra011709 | A01-0.945  | 5 |
| R2 | RS2CL5010s | 16.14 | Bra011805 | A01-0.431  | 5 |
| R2 | RGB5729c   | 16.47 |           |            | 5 |
| R2 | RGC5970c   | 16.47 | Bra011887 | A01-0.073  | 5 |
| R2 | RGC8308c   | 16.47 |           |            | 5 |
| R2 | RGB12209c  | 16.67 | Bra011669 | A01-1.151  | 5 |
| R2 | RSS1863    | 16.8  | Bra011620 | A01-1.375  | 5 |
| R2 | RSS2730    | 16.8  | Bra011643 | A01-1.292  | 5 |
| R2 | RS2CL2152s | 16.82 | Bra014487 | A04-0.989  | 5 |
| R2 | RSS1640    | 16.9  | Bra011645 | A01-1.285  | 5 |
| R2 | RGC17861c  | 17.15 |           |            | 5 |
| R2 | RGA1922s   | 17.24 | Bra033555 | A06-25.188 | 5 |
| R2 | RS2CL7559s | 17.37 | Bra011851 | A01-0.233  | 5 |
| R2 | RS2CL826s  | 17.52 | Bra011824 | A01-0.354  | 5 |
| R2 | RS2CL6429s | 17.75 | Bra011783 | A01-0.563  | 5 |
| R2 | RS2CL4831s | 17.76 | Bra011816 | A01-0.395  | 5 |
| R2 | RS2CL3429s | 17.76 | Bra011812 | A01-0.407  | 5 |
| R2 | RS2CL6141s | 17.92 | Bra011779 | A01-0.593  | 5 |
| R2 | RS2CL2740s | 18.06 | Bra011751 | A01-0.732  | 5 |
| R2 | RSS1435    | 18.1  | Bra011540 | A01-1.767  | 5 |

|    |            |       |           |            |   |
|----|------------|-------|-----------|------------|---|
| R2 | RSS2508    | 18.2  | Bra011545 | A01-1.74   | 5 |
| R2 | Rs2CL1685s | 18.75 | Bra011643 | A01-1.292  | 5 |
| R2 | RS2CL2162s | 19    |           |            | 5 |
| R2 | RS2CL1115s | 19.23 | Bra011434 | A01-2.182  | 5 |
| R2 | RSS1796    | 19.4  | Bra011459 | A01-2.087  | 5 |
| R2 | RS2CL6767s | 19.46 | Bra011683 | A01-1.067  | 5 |
| R2 | RS2CL8214s | 19.55 | Bra011656 | A01-1.234  | 5 |
| R2 | RGC21070c  | 19.59 |           |            | 5 |
| R2 | RGC212c    | 19.59 |           |            | 5 |
| R2 | RGC2575c   | 19.59 | Bra011630 | A01-1.344  | 5 |
| R2 | RGC2666c   | 19.59 |           |            | 5 |
| R2 | RGC6462c   | 19.59 | Bra037291 | A09-5.116  | 5 |
| R2 | RS2CL4022s | 19.85 | Bra011605 | A01-1.439  | 5 |
| R2 | Rs2CL1791s | 19.86 |           |            | 5 |
| R2 | RGC16214c  | 19.95 |           |            | 5 |
| R2 | RS2CL7540s | 20.16 | Bra011573 | A01-1.626  | 5 |
| R2 | RGC22795c  | 20.7  | Bra011424 | A01-2.237  | 5 |
| R2 | RS2CL6543s | 20.72 | Bra011417 | A01-2.257  | 5 |
| R2 | RS2CL3997s | 20.74 | Bra011544 | A01-1.745  | 5 |
| R2 | RSS3566    | 20.9  | Bra011250 | A01-3.083  | 5 |
| R2 | RGC4451c   | 21.13 | Bra011536 | A01-1.787  | 5 |
| R2 | RS2CL1822s | 21.21 | Bra011319 | A01-2.744  | 5 |
| R2 | RGC4476c   | 21.51 | Bra011178 | A01-3.465  | 5 |
| R2 | RS2CL5248s | 21.66 | Bra011353 | A01-2.597  | 5 |
| R2 | RS2CL6952s | 21.76 | Bra011350 | A01-2.616  | 5 |
| R2 | RSS0957    | 21.9  | Bra011236 | A01-3.156  | 5 |
| R2 | RS2CL5432s | 22.08 | Bra011349 | A01-2.621  | 5 |
| R2 | RGC10385c  | 22.23 | Bra011221 | A01-3.246  | 5 |
| R2 | RSS2483    | 22.5  |           |            | 5 |
| R2 | RS2CL4657s | 22.51 | Bra016914 | A04-17.737 | 5 |
| R2 | RS2CL4960s | 22.85 | Bra011222 | A01-3.242  | 5 |
| R2 | RS2CL3611s | 23.07 | Bra011228 | A01-3.196  | 5 |
| R2 | RSS3805    | 23.1  |           |            | 5 |
| R2 | RGC12573c  | 23.27 |           |            | 5 |
| R2 | RGC1566c   | 23.27 |           |            | 5 |
| R2 | RGC3643c   | 23.27 |           |            | 5 |
| R2 | RGB419c    | 23.27 | Bra011154 | A01-3.63   | 5 |
| R2 | RGC4350c   | 23.27 |           |            | 5 |
| R2 | RGB921c    | 23.27 | Bra011387 | A01-2.402  | 5 |
| R2 | RS2CL2632s | 23.29 | Bra011250 | A01-3.083  | 5 |
| R2 | RS2CL2446s | 23.61 | Bra011168 | A01-3.542  | 5 |
| R2 | RS2CL1476s | 23.8  | Bra011172 | A01-3.518  | 5 |
| R2 | RS2CL1124s | 23.94 | Bra024095 | A03-27.718 | 5 |
| R2 | RS2CL5639s | 24.16 | Bra011179 | A01-3.463  | 5 |
| R2 | RS2CL3061s | 24.43 | Bra011170 | A01-3.531  | 5 |
| R2 | CB72H      | 24.5  |           |            | 5 |



|    |            |       |           |            |   |
|----|------------|-------|-----------|------------|---|
| R2 | Rs2CL1639s | 24.64 | Bra011118 | A01-3.814  | 5 |
| R2 | RS2CL8169s | 24.94 | Bra011240 | A01-3.13   | 5 |
| R2 | BRMS036    | 25.2  |           |            | 5 |
| R2 | RGC12949c  | 25.36 | Bra011065 | A01-4.127  | 5 |
| R2 | RGC148c    | 25.36 | Bra011072 | A01-4.087  | 5 |
| R2 | RS2CL3052s | 25.46 | Bra011056 | A01-4.183  | 5 |
| R2 | RSS0445    | 25.8  | Bra010339 | A08-13.182 | 5 |
| R2 | RS2CL7090s | 25.88 | Bra034810 | A05-22.249 | 5 |
| R2 | RS2CL4177s | 26.05 | Bra011069 | A01-4.109  | 5 |
| R2 | RSS0802    | 26.3  | Bra011042 | A01-4.276  | 5 |
| R2 | RSS3702    | 26.5  | Bra011034 | A01-4.327  | 5 |
| R2 | RS2CL6599s | 26.65 | Bra011037 | A01-4.315  | 5 |
| R2 | RGB3040c   | 26.97 | Bra026274 | A01-10.045 | 6 |
| R2 | RSS1032    | 27    |           |            | 6 |
| R2 | RS2CL6683s | 27.19 | Bra026262 | A01-10.118 |   |
| R2 | RGC7444c   | 27.36 | Bra011038 | A01-4.293  | 6 |
| R2 | Rs2CL2399s | 27.68 | Bra026304 | A01-9.912  | 6 |
| R2 | RGC20165c  | 27.88 | Bra011026 | A01-4.355  | 6 |
| R2 | RGC2344c   | 27.88 | Bra026386 | A01-9.404  | 6 |
| R2 | RGC9866c   | 27.88 |           |            | 6 |
| R2 | RSS2114    | 27.9  | Bra026335 | A01-9.74   | 6 |
| R2 | RGC9047c   | 28    |           |            | 6 |
| R2 | RS2CL4120s | 28    | Bra026301 | A01-9.926  | 6 |
| R2 | RS2CL831s  | 28.34 | Bra026294 | A01-9.968  | 6 |
| R2 | RS2CL2568s | 28.61 | Bra019085 | A03-26.439 | 6 |
| R2 | RS2CL2222s | 28.81 | Bra026340 | A01-9.724  | 6 |
| R2 | RS2CL7550s | 29.06 | Bra026349 | A01-9.657  | 6 |
| R2 | RS2CL1001s | 29.17 | Bra026350 | A01-9.655  | 6 |
| R2 | RS2CL2803s | 29.61 | Bra026426 | A01-9.161  | 6 |
| R2 | RGC2145c   | 30.12 | Bra013948 | A01-8.657  | 6 |
| R2 | RS2CL3202s | 30.38 | Bra013924 | A01-8.479  | 6 |
| R2 | RSS3094    | 30.5  | Bra013945 | A01-8.648  | 6 |
| R2 | RS2CL3241s | 30.7  | Bra026450 | A01-9.041  | 6 |
| R2 | RGC43c     | 31.12 |           |            | 6 |
| R2 | RSS2752    | 31.2  | Bra013912 | A01-8.42   | 6 |
| R2 | RS2CL1313s | 31.21 | Bra026376 | A01-9.44   | 6 |
| R2 | RGC7617c   | 31.35 |           |            | 6 |
| R2 | RSS2898    | 31.4  | Bra013918 | A01-8.448  | 6 |
| R2 | RS2CL3641s | 31.7  | Bra013900 | A01-8.374  | 6 |
| R2 | RS2CL2961s | 32.19 | Bra013888 | A01-8.258  | 6 |
| R2 | RS2CL3459s | 32.49 | Bra019192 | A03-25.814 | 6 |
| R2 | RS2CL1051s | 32.92 | Bra013907 | A01-8.405  | 6 |
| R2 | RSS1170    | 33.1  | Bra013836 | A01-8.021  | 6 |
| R2 | RSS2001    | 33.5  | Bra013832 | A01-8.003  | 6 |
| R2 | RS2CL6882s | 33.69 | Bra013939 | A01-8.565  | 6 |
| R2 | RS2CL4789s | 35.07 | Bra013786 | A01-7.756  | 6 |

|    |            |       |           |            |   |
|----|------------|-------|-----------|------------|---|
| R2 | RS2CL4931s | 35.07 | Bra011180 | A01-3.456  | 6 |
| R2 | RS2CL6206s | 35.07 | Bra013790 | A01-7.77   | 6 |
| R2 | Rs2CL2267s | 35.07 | Bra013797 | A01-7.796  | 6 |
| R2 | RS2CL3897s | 35.7  | Bra013690 | A01-7.161  | 6 |
| R2 | RSS0645    | 36    | Bra011765 | A01-0.672  | 6 |
| R2 | RSS1152    | 36    | Bra013706 | A01-7.29   | 6 |
| R2 | RSS2678    | 36    |           |            | 6 |
| R2 | RGC1244c   | 36.02 | Bra013636 | A01-6.785  | 6 |
| R2 | RSS2341    | 36.1  | Bra019300 | A03-25.12  | 6 |
| R2 | RS2CL7884s | 36.19 | Bra013734 | A01-7.5    | 6 |
| R2 | RS2CL3734s | 36.37 | Bra013652 | A01-6.886  | 6 |
| R2 | Rs2CL1620s | 36.37 | Bra013642 | A01-6.816  | 6 |
| R2 | RS2CL5841s | 36.66 | Bra013708 | A01-7.315  | 6 |
| R2 | RS2CL1379s | 37.03 | Bra013631 | A01-6.755  | 6 |
| R2 | RSS1500    | 37.3  | Bra013598 | A01-6.562  | 6 |
| R2 | RSS4012    | 37.3  | Bra013606 | A01-6.615  | 6 |
| R2 | RSS3707    | 37.6  | Bra013549 | A01-6.278  | 6 |
| R2 | RSS0715    | 37.7  | Bra013539 | A01-6.204  | 6 |
| R2 | RSS1692    | 37.7  | Bra013576 | A01-6.434  | 6 |
| R2 | RSS2367    | 38.7  | Bra013453 | A01-5.769  | 6 |
| R2 | RSS3086    | 38.7  | Bra013456 | A01-5.801  | 6 |
| R2 | RS2CL1253s | 39.05 | Bra013617 | A01-6.652  | 6 |
| R2 | RS2CL7301s | 39.34 | Bra013602 | A01-6.599  | 6 |
| R2 | RGC12272c  | 39.68 |           |            | 6 |
| R2 | RGC18651c  | 39.68 |           |            | 6 |
| R2 | RGC4643c   | 39.68 | Bra013541 | A01-6.21   | 6 |
| R2 | RS2CL8395s | 39.86 | Bra013556 | A01-6.34   | 6 |
| R2 | RS2CL3283s | 40.08 | Bra013468 | A01-5.847  | 6 |
| R2 | RS2CL5011s | 40.59 | Bra013456 | A01-5.801  | 6 |
| R2 | RSS2368    | 40.62 | Bra039543 | A01-11.525 | 6 |
| R2 | RSS3742    | 40.62 | Bra012716 | A03-22.602 | 6 |
| R2 | RSS3354    | 40.72 | Bra013269 | A01-4.645  | 6 |
| R2 | RGA106s    | 40.91 |           |            | 6 |
| R2 | RS2CL5071s | 41.08 | Bra013373 | A01-5.273  | 6 |
| R2 | RS2CL942s  | 41.4  | Bra013440 | A01-5.683  | 6 |
| R2 | RSS0590    | 41.62 | Bra036882 | A01-12.234 | 6 |
| R2 | RS2CL7475s | 42.8  | Bra013303 | A01-4.876  | 6 |
| R2 | RSS1031    | 42.81 | Bra023563 | A02-2.913  | 6 |
| R2 | RS2CL2108s | 43.74 | Bra040093 | A01-10.535 | 6 |
| R2 | RGB13975c  | 44.12 | Bra013470 | A01-5.853  | 6 |
| R2 | RSS0156    | 44.14 | Bra019095 | A03-26.375 | 6 |
| R2 | RS2CL4957s | 44.62 | Bra040182 | A01-4.539  | 6 |
| R2 | RS2CL1710s | 45.89 | Bra036878 | A01-12.263 | 6 |
| R2 | CA43       | 46.15 |           |            | 6 |
| R2 | RS2CL2938s | 46.32 | Bra038877 | A01-15.461 | 6 |
| R2 | RGC11533c  | 46.32 | Bra013287 | A01-4.752  | 6 |

|    |            |       |           |                      |   |
|----|------------|-------|-----------|----------------------|---|
| R2 | RGC15219c  | 46.32 |           |                      | 6 |
| R2 | RGC7035c   | 46.75 |           |                      | 6 |
| R2 | RGB966c    | 46.75 | Bra038448 | A01-10.949           | 6 |
| R2 | S582       | 46.95 |           |                      | 6 |
| R2 | RGC6477c   | 47.53 | Bra013313 | A01-4.932            | 6 |
| R2 | Rs2CL2264s | 48.06 | Bra039721 | A08-6.427            | 6 |
| R2 | RS2CL5524s | 48.33 | Bra036878 | A01-12.263           | 6 |
| R2 | RGC22331c  | 49.21 | Bra013717 | A01-7.372            | 6 |
| R2 | RS2CL2407s | 49.8  | Bra006362 | A03-3.184            | 6 |
| R2 | RGC27211c  | 50.63 | Bra036900 | A01-12.05            | 6 |
| R2 | RGC4684c   | 51.43 |           |                      | 6 |
| R2 | RGC14244c  | 52.4  | Bra013443 | A01-5.695            | 6 |
| R2 | RS2CL9061s | 53.2  | Bra023433 | A02-2.328            | 7 |
| R2 | RS2CL5137s | 53.59 | Bra023435 | A02-2.334            | 7 |
| R2 | CC29       | 54.54 |           |                      | 7 |
| R2 | RS2CL868s  | 54.62 | Bra023413 | A02-2.244            | 7 |
| R2 | RGB500c    | 55.34 | Bra023518 | A02-2.708            | 7 |
| R2 | RGC1836c   | 55.7  | Bra038172 | Scaffold000140-0.346 | 7 |
| R2 | RS2CL2432s | 56.46 | Bra028585 | A02-1.601            | 7 |
| R2 | RGB1399c   | 57.19 |           |                      | 7 |
| R2 | RS2CL7359s | 57.82 | Bra028570 | A02-1.664            | 7 |
| R2 | RS2CL5452s | 58.64 |           |                      | 7 |
| R2 | RS2CL1869s | 58.94 | Bra028665 | A02-1.256            | 7 |
| R2 | RGC9493c   | 59.59 |           |                      | 7 |
| R2 | CC98bH     | 60.48 |           |                      | 7 |
| R2 | RGC23821c  | 60.48 |           |                      | 7 |
| R2 | RGC1979c   | 63.35 | Bra028578 | A02-1.634            | 7 |
| R2 | RS2CL2645s | 64.21 | Bra028825 | A02-0.483            | 7 |
| R2 | RS2CL4947s | 64.26 | Bra028860 | A02-0.333            | 7 |
| R2 | RS2CL2123s | 65.65 | Bra028906 | A02-0.106            | 7 |
| R2 | RGC1333c   | 66.38 |           |                      |   |
| R2 | STG2F12    | 67.38 |           |                      | 8 |
| R2 | RGC1167c   | 67.88 |           |                      | 8 |
| R2 | RGC7750c   | 67.88 | Bra022709 | A02-6.852            | 8 |
| R2 | RGB9670c   | 67.88 | Bra022717 | A02-6.816            | 8 |
| R2 | RGC13599c  | 69.68 | Bra040900 | Scaffold000302-0.016 | 8 |
| R2 | RS2CL5848s | 70.53 | Bra022683 | A02-7.027            | 8 |
| R2 | RGC11438c  | 71.44 | Bra035582 | A02-6.396            | 8 |
| R2 | RS2CL2713s | 72.33 | Bra035587 | A02-6.385            | 8 |
| R2 | RGC13134c  | 73.11 | Bra035619 | A02-6.212            | 8 |
| R2 | RGC820c    | 73.71 | Bra020286 | A02-5.001            | 8 |
| R2 | RS2CL5541s | 74.31 | Bra035650 | A02-5.918            | 8 |
| R2 | RS2CL4123s | 74.58 | Bra035637 | A02-6.045            | 8 |
| R2 | RGC5945c   | 74.85 | Bra020377 | A02-5.436            | 8 |
| R2 | RGC22105c  | 75.04 |           |                      | 8 |
| R2 | RGA1974s   | 75.6  |           |                      | 8 |

|    |            |        |           |                      |   |
|----|------------|--------|-----------|----------------------|---|
| R2 | RS2CL5783s | 75.94  | Bra020433 | A02-5.708            | 8 |
| R2 | RS2CL4762s | 76.11  | Bra002737 | A10-7.995            | 8 |
| R2 | RS2CL5589s | 76.67  | Bra020411 | A02-5.56             | 8 |
| R2 | RS2CL3263s | 77.93  | Bra020332 | A02-5.227            | 8 |
| R2 | RSS1758_a  | 78.06  | Bra002241 | A10-10.779           | 8 |
| R2 | RS2CL3772s | 78.07  | Bra020341 | A02-5.287            | 8 |
| R2 | RS2CL4384s | 79.33  | Bra020311 | A02-5.13             | 8 |
| R2 | OPT04H     | 80.88  |           |                      | 8 |
| R2 | RSS1614    | 81.58  | Bra006692 | A03-4.655            | 8 |
| R2 | RSS1076    | 82.28  | Bra020239 | A02-4.768            | 8 |
| R2 | RSS1341    | 82.68  | Bra020237 | A02-4.734            | 8 |
| R2 | RSS2394    | 82.78  | Bra020239 | A02-4.768            | 8 |
| R2 | RS2CL7538s | 83.28  | Bra020232 | A02-4.681            | 8 |
| R2 | RSS0119    | 83.98  | Bra020184 | A02-4.417            | 8 |
| R2 | CA87aH     | 85.68  |           |                      | 8 |
| R2 | RSS2308    | 86.78  | Bra002280 | A10-10.59            | 8 |
| R2 | RS2CL3410s | 89.36  | Bra040902 | Scaffold000302-0.028 | 8 |
| R2 | RS2CL2004s | 89.93  | Bra020155 | A02-4.272            | 8 |
| R2 | RS2CL1934s | 90.29  | Bra020136 | A02-4.174            | 8 |
| R2 | RGC10518c  | 90.29  | Bra020037 | A02-3.715            | 8 |
| R2 | RS2CL5545s | 90.94  | Bra020190 | A02-4.444            | 8 |
| R2 | RSS3936    | 91.67  | Bra029968 | A01-14.826           | 8 |
| R2 | RS2CL3191s | 91.85  | Bra020082 | A02-3.938            | 8 |
| R2 | RGC3758c   | 92.25  | Bra020079 | A02-3.919            | 8 |
| R2 | RGC10400c  | 92.64  |           |                      | 8 |
| R2 | RS2CL3650s | 93.11  | Bra023697 | A02-3.554            | 8 |
| R2 | RS2CL2542s | 93.48  | Bra002216 | A10-10.894           | 8 |
| R2 | CB93       | 93.64  |           |                      | 8 |
| R2 | CC45b      | 95.5   |           |                      | 8 |
| R2 | RS2CL6642s | 95.63  | Bra023641 | A02-3.307            | 8 |
| R2 | CD72aH     | 96.43  |           |                      | 8 |
| R2 | OPT12b     | 97.63  |           |                      | 8 |
| R2 | CA68       | 98.73  |           |                      | 8 |
| R2 | RS2CL6884s | 98.86  | Bra029972 | A01-14.882           | 8 |
| R2 | CO-2       | 99.2   |           |                      | 8 |
| R2 | RGB1253c   | 99.55  |           |                      | 8 |
| R2 | OPE10      | 99.57  |           |                      | 8 |
| R2 | OPK06      | 99.87  |           |                      | 8 |
| R2 | CB56       | 99.97  |           |                      | 8 |
| R2 | CC42a      | 100.37 |           |                      | 8 |
| R2 | RGC2431c   | 100.78 | Bra008529 | A02-15.229           | 9 |
| R2 | RSS2455    | 101.41 | Bra033767 | A01-13.892           | 9 |
| R2 | RGC4812c   | 101.88 |           |                      | 9 |
| R2 | RSS1140    | 101.97 | Bra037606 | A01-12.628           | 9 |
| R2 | RS2CL1225s | 102.08 | Bra008517 | A02-15.127           | 9 |
| R2 | RSS2316    | 102.43 | Bra018212 | A06-10.808           | 9 |

|    |            |        |           |                      |    |
|----|------------|--------|-----------|----------------------|----|
| R2 | RSS2594    | 102.73 |           |                      | 9  |
| R2 | RSS1635    | 102.83 |           |                      | 9  |
| R2 | RSS3530_a  | 102.83 |           |                      | 9  |
| R2 | RSS3934    | 102.83 | Bra008520 | A02-15.163           | 9  |
| R2 | RS2CL4062s | 103.51 | Bra018469 | A05-8.384            | 9  |
| R2 | CC62       | 104.33 |           |                      | 9  |
| R2 | RSS2572    | 105.33 | Bra033122 | A02-16.365           | 9  |
| R2 | RSS0373    | 105.53 | Bra029435 | A09-17.241           | 9  |
| R2 | RSS2081    | 106.43 | Bra033134 | A02-16.482           | 9  |
| R2 | RSS0968    | 109.13 | Bra033173 | A02-16.895           | 9  |
| R2 | RGC11673c  | 111.59 |           |                      | 9  |
| R2 | CB82H      | 111.74 |           |                      | 9  |
| R2 | RS2CL7828s | 111.76 |           |                      | 9  |
| R2 | RS2CL3640s | 112.16 | Bra033156 | A02-16.716           | 9  |
| R2 | RSS2889    | 112.19 | Bra022549 | A02-8.048            | 9  |
| R2 | RS2CL3017s | 112.82 | Bra033117 | A02-16.288           | 9  |
| R2 | RSS2721    | 112.83 |           |                      | 9  |
| R2 | OPT16b     | 114.33 |           |                      | 9  |
| R2 | RS2CL4126s | 114.34 | Bra033197 | A02-17.244           | 9  |
| R2 | RGA1566s   | 115.56 |           |                      | 9  |
| R2 | Rs2CL2368s | 116.12 | Bra040656 | Scaffold000230-0.014 | 9  |
| R2 | RSS1798    | 116.12 | Bra040624 | A02-8.929            | 10 |
| R2 | RGC3637c   | 116.43 |           |                      | 10 |
| R2 | CA39       | 117.35 |           |                      | 10 |
| R2 | RGA154s    | 117.59 |           |                      | 10 |
| R2 | RGC18172c  | 118.6  | Bra038305 | A02-10.366           | 10 |
| R2 | RSS2958    | 118.61 | Bra034018 | A02-9.172            | 10 |
| R2 | RS2CL3903s | 118.85 | Bra039748 | A02-8.709            | 10 |
| R2 | RS2CL836s  | 119.25 | Bra039740 | A02-8.663            | 10 |
| R2 | RGC13420c  | 120    |           |                      | 10 |
| R2 | RS2CL4187s | 120.34 | Bra033998 | A02-9.34             | 10 |
| R2 | RGB10737c  | 120.78 | Bra034033 | A02-9.046            | 10 |
| R2 | RGC11938c  | 120.78 | Bra034012 | A02-9.208            | 10 |
| R2 | RSS3138    | 120.86 | Bra022542 | A02-8.131            | 10 |
| R2 | RS2CL6395s | 122.3  | Bra033938 | A02-9.772            | 10 |
| R2 | RS2CL3405s | 122.76 | Bra038348 | A02-10.088           | 10 |
| R2 | RGC13684c  | 123.32 |           |                      | 10 |
| R2 | RSS3268    | 123.53 | Bra038316 | A02-10.323           | 10 |
| R2 | RGC2676c   | 123.61 |           |                      | 10 |
| R2 | RGC7958c   | 124.04 |           |                      | 10 |
| R2 | RS2CL5422s | 124.16 | Bra038321 | A02-10.294           | 10 |
| R2 | RS2CL3768s | 124.53 | Bra007881 | A02-10.552           | 10 |
| R2 | RGC9765c   | 124.71 | Bra007865 | A02-10.393           | 10 |
| R2 | RS2CL2980s | 125.34 | Bra007872 | A02-10.454           | 10 |
| R2 | RSS1262    | 125.5  | Bra038308 | A02-10.357           | 10 |
| R2 | RGB716c    | 126.74 | Bra032574 | A09-38.447           | 10 |

|    |            |        |           |            |    |
|----|------------|--------|-----------|------------|----|
| R2 | RS2CL6075s | 127.94 | Bra010286 | A08-12.873 | 10 |
| R2 | RGC1792c   | 129.51 |           |            | 10 |
| R2 | CD87b      | 129.91 |           |            | 10 |
| R2 | RS2CL4370s | 130.56 | Bra008072 | A02-12.007 | 10 |
| R2 | RGC15769c  | 130.68 | Bra020218 | A02-4.587  | 10 |
| R2 | RGC6336c   | 130.71 |           |            | 10 |
| R2 | RGC1718c   | 131.61 | Bra008241 | A02-13.025 | 10 |
| R2 | CA95b      | 132.47 |           |            | 10 |
| R2 | RS2CL2371s | 132.51 | Bra008202 | A02-12.773 | 10 |
| R2 | RGA1718s   | 132.9  |           |            | 10 |
| R2 | RGC2467c   | 133.04 | Bra008184 | A02-12.643 | 10 |
| R2 | RSS0477    | 133.16 | Bra008172 | A02-12.578 | 10 |
| R2 | RS2CL867s  | 133.81 | Bra008152 | A02-12.453 | 10 |
| R2 | RSS1885    | 134.86 | Bra008246 | A02-13.064 | 10 |
| R2 | RS2CL4248s | 134.95 | Bra003672 | A07-17.663 | 10 |
| R2 | RGC15951c  | 135.1  |           |            | 10 |
| R2 | RGC6949c   | 135.1  |           |            | 10 |
| R2 | RS2CL2716s | 135.95 | Bra008353 | A02-13.978 | 10 |
| R2 | RGC12310c  | 136.55 | Bra035131 | A07-25.592 | 10 |
| R2 | RS2CL1046s | 137.05 | Bra008407 | A02-14.411 | 10 |
| R2 | RSS0822    | 137.36 | Bra008097 | A02-12.123 | 10 |
| R2 | Rs2CL2604s | 137.46 | Bra008476 | A02-14.882 | 10 |
| R2 | RGC15477c  | 138.39 |           |            | 10 |
| R2 | RS2CL3703s | 139.86 | Bra008411 | A02-14.449 | 10 |
| R2 | RGB5639c   | 142.35 |           |            | 10 |
| R2 | RGC16522c  | 144.97 | Bra033987 | A02-9.415  | 10 |
| R2 | RGC16935c  | 146.66 |           |            |    |
| R3 | RS2CL3605s | 0      | Bra022587 | A02-7.703  |    |
| R3 | RSS1377    | 12.27  | Bra005691 | A03-0.143  | 11 |
| R3 | RGC21838c  | 12.38  |           |            | 11 |
| R3 | RGC6058c   | 13.93  |           |            | 11 |
| R3 | RSS3168    | 14.17  | Bra005984 | A03-1.499  | 11 |
| R3 | RS2CL683s  | 15.22  | Bra009536 | A10-15.947 | 11 |
| R3 | RS2CL3040s | 16.78  | Bra005719 | A03-0.272  | 11 |
| R3 | RS2CL6139s | 17.34  | Bra005661 | A03-0.034  | 11 |
| R3 | RS2CL3557s | 18.05  | Bra005998 | A03-1.543  | 11 |
| R3 | RGC4640c   | 18.08  |           |            | 11 |
| R3 | CA05b      | 18.37  |           |            | 11 |
| R3 | RS2CL1245s | 19.46  | Bra005901 | A03-1.117  | 11 |
| R3 | RGA93s     | 19.93  |           |            | 11 |
| R3 | RGC9028c   | 19.95  |           |            | 11 |
| R3 | RSS0816    | 20.27  | Bra005929 | A03-1.273  | 11 |
| R3 | RGC3942c   | 20.67  |           |            | 11 |
| R3 | RGA1553s   | 21.24  |           |            | 11 |
| R3 | RS2CL1424s | 22.26  | Bra006082 | A03-1.905  | 11 |

|    |            |       |           |           |    |
|----|------------|-------|-----------|-----------|----|
| R3 | RS2CL6686s | 22.71 | Bra006120 | A03-2.1   | 11 |
| R3 | RSS0486    | 23.17 | Bra006103 | A03-2.014 | 11 |
| R3 | RS2CL4186s | 23.23 | Bra006190 | A03-2.432 | 11 |
| R3 | RSS2764    | 23.37 | Bra006107 | A03-2.046 | 11 |
| R3 | RGC9371c   | 23.92 | Bra006129 | A03-2.134 | 11 |
| R3 | RS2CL6155s | 23.97 | Bra006117 | A03-2.088 | 11 |
| R3 | Z46819     | 24.27 |           |           | 11 |
| R3 | RS2CL2845s | 24.88 | Bra006237 | A03-2.646 | 11 |
| R3 | RSS2403    | 25.17 | Bra006215 | A03-2.555 | 11 |
| R3 | RS2CL4457s | 25.37 | Bra006235 | A03-2.637 | 11 |
| R3 | RGC5894c   | 25.43 |           |           | 11 |
| R3 | RGC5939c   | 25.43 | Bra006227 | A03-2.61  | 11 |
| R3 | RGB10851c  | 25.97 | Bra006334 | A03-3.059 | 11 |
| R3 | RGC22415c  | 25.97 | Bra006241 | A03-2.659 | 11 |
| R3 | RGC3069c   | 25.97 | Bra006453 | A03-3.559 | 11 |
| R3 | RSS2108    | 26.17 | Bra006352 | A03-3.142 | 11 |
| R3 | RSS2935    | 26.97 | Bra006415 | A03-3.412 | 11 |
| R3 | RS2CL4299s | 27.74 |           |           | 11 |
| R3 | RSS0832    | 27.87 | Bra020363 | A02-5.384 | 11 |
| R3 | RS2CL6594s | 28.31 | Bra006454 | A03-3.563 | 11 |
| R3 | RGB8990c   | 29.16 | Bra006158 | A03-2.282 | 11 |
| R3 | RSS2634    | 29.67 | Bra006505 | A03-3.825 | 11 |
| R3 | RGB12858c  | 29.83 |           |           | 11 |
| R3 | RSS1743    | 30.37 | Bra020043 | A02-3.757 | 11 |
| R3 | RSS2359    | 30.67 | Bra006571 | A03-4.097 | 11 |
| R3 | RSS3002    | 30.67 | Bra006537 | A03-3.959 | 11 |
| R3 | RSS3172    | 30.67 | Bra006553 | A03-4.014 | 11 |
| R3 | RSS1931    | 30.77 | Bra006524 | A03-3.906 | 11 |
| R3 | RSS0692    | 31.37 | Bra006603 | A03-4.225 | 11 |
| R3 | RSS1117    | 31.37 | Bra006603 | A03-4.225 | 11 |
| R3 | RSS0789    | 32.17 | Bra020169 | A02-4.355 | 11 |
| R3 | RS2CL1360s | 32.23 | Bra006618 | A03-4.297 | 11 |
| R3 | RGC5762c   | 33    | Bra006641 | A03-4.421 | 11 |
| R3 | RSS1261    | 33.96 | Bra006629 | A03-4.354 | 11 |
| R3 | RSS0977    | 34.16 | Bra006626 | A03-4.334 | 11 |
| R3 | Rs2CL2367s | 35.4  | Bra011523 | A01-1.834 | 11 |
| R3 | Rs2CL2374s | 36.41 | Bra006727 | A03-4.81  | 11 |
| R3 | RS2CL2369s | 36.41 | Bra020353 | A02-5.337 | 11 |
| R3 | RS2CL6944s | 36.6  | Bra006753 | A03-4.912 | 11 |
| R3 | RS2CL1855s | 36.78 | Bra006731 | A03-4.831 | 11 |
| R3 | RGC662c    | 36.95 |           |           | 11 |
| R3 | RSS2129    | 37.7  | Bra006819 | A03-5.188 | 11 |
| R3 | RGB5491c   | 39.04 |           |           | 11 |
| R3 | CZ09       | 39.21 |           |           | 11 |
| R3 | RGC15408c  | 39.83 |           |           | 11 |
| R3 | CA05a      | 40.92 |           |           | 11 |

|    |            |       |           |           |    |
|----|------------|-------|-----------|-----------|----|
| R3 | RGC11985c  | 41.21 |           |           | 11 |
| R3 | RGC1838c   | 41.21 |           |           | 11 |
| R3 | RGC2115c   | 41.21 |           |           | 11 |
| R3 | RS2CL3966s | 41.97 | Bra028924 | A03-5.44  | 11 |
| R3 | RS2CL812s  | 42.64 | Bra028957 | A03-5.597 | 11 |
| R3 | RSS3288    | 42.74 | Bra028922 | A03-5.433 | 11 |
| R3 | RGC2693c   | 42.9  | Bra029095 | A03-6.336 | 11 |
| R3 | RGC4050c   | 42.9  | Bra028971 | A03-5.656 | 11 |
| R3 | RGC4388c   | 43.29 |           |           | 11 |
| R3 | RGC12111c  | 43.34 |           |           | 11 |
| R3 | RGC7232c   | 43.5  |           |           | 11 |
| R3 | RS2CL2195s | 43.62 | Bra029000 | A03-5.808 | 11 |
| R3 | RGC23188c  | 44.01 |           |           | 11 |
| R3 | RSS1540    | 44.56 |           |           | 11 |
| R3 | RGC6897c   | 44.92 | Bra028982 | A03-5.707 | 11 |
| R3 | RS2CL5856s | 46.17 | Bra029091 | A03-6.32  | 11 |
| R3 | RS2CL7274s | 47.01 | Bra029107 | A03-6.403 | 11 |
| R3 | CA05aN     | 47.4  |           |           | 11 |
| R3 | RS2CL7810s | 47.79 | Bra028301 | A10-4.801 | 11 |
| R3 | H36913     | 49.21 |           |           | 11 |
| R3 | RGC3691c   | 49.24 | Bra022751 | A03-6.825 | 11 |
| R3 | RS2CL1767s | 50.07 | Bra022816 | A03-7.233 | 11 |
| R3 | RGB2849c   | 51.25 | Bra029121 | A03-6.464 | 11 |
| R3 | ACGM18     | 51.95 |           |           | 11 |
| R3 | RS2CL1552s | 52.03 | Bra022751 | A03-6.825 | 11 |
| R3 | RSS2841    | 52.85 | Bra022808 | A03-7.176 | 11 |
| R3 | RS2CL1544s | 53.12 | Bra022815 | A03-7.23  | 11 |
| R3 | RSS2981    | 53.56 | Bra022870 | A03-7.491 | 11 |
| R3 | RGC8225c   | 53.73 |           |           | 11 |
| R3 | RSS2675    | 53.96 | Bra005564 | A05-6.25  | 11 |
| R3 | CA25       | 54.26 |           |           | 11 |
| R3 | CB96       | 54.76 |           |           | 11 |
| R3 | RGC4948c   | 55.47 |           |           | 11 |
| R3 | RSS2362_a  | 55.57 | Bra022931 | A03-7.83  | 11 |
| R3 | RS2CL5646s | 56.07 | Bra022826 | A03-7.294 | 11 |
| R3 | RSS2207    | 56.58 | Bra022993 | A03-8.148 | 11 |
| R3 | RSS2468    | 56.98 | Bra022958 | A03-7.951 | 11 |
| R3 | CB94       | 57.48 |           |           | 11 |
| R3 | RGA1712s   | 58.99 | Bra023072 | A03-8.539 | 11 |
| R3 | RS2CL5207s | 59.06 | Bra022981 | A03-8.083 | 11 |
| R3 | RSS2225    | 59.3  |           |           | 11 |
| R3 | RGC10740c  | 59.51 |           |           | 11 |
| R3 | RSS2174    | 60.19 | Bra023091 | A03-8.657 | 11 |
| R3 | RGB3739c   | 60.33 |           |           | 11 |
| R3 | RS2CL3113s | 61.11 | Bra023084 | A03-8.601 | 11 |
| R3 | RSS1494    | 61.19 | Bra000011 | A03-8.843 | 11 |



|    |            |       |           |            |    |
|----|------------|-------|-----------|------------|----|
| R3 | RSS3166    | 61.59 | Bra000064 | A03-9.149  | 11 |
| R3 | RS2CL3855s | 61.86 | Bra000015 | A03-8.872  | 11 |
| R3 | CF06       | 63.27 |           |            | 11 |
| R3 | RGB10862c  | 63.47 |           |            | 11 |
| R3 | RSS1258    | 64.87 | Bra000102 | A03-9.269  | 11 |
| R3 | RSS1041    | 65.37 | Bra000102 | A03-9.269  | 11 |
| R3 | RGC11016c  | 66.07 |           |            | 11 |
| R3 | CC42b      | 66.24 |           |            | 11 |
| R3 | RGC107c    | 68.06 |           |            | 11 |
| R3 | RGC21094c  | 68.06 |           |            | 11 |
| R3 | RSS0596    | 68.25 |           |            | 11 |
| R3 | RGA1793s   | 68.4  |           |            | 11 |
| R3 | RGC8038c   | 68.78 | Bra000071 | A03-9.168  | 11 |
| R3 | RS2CL4752s | 69.57 | Bra016951 | A04-17.526 | 11 |
| R3 | RGC19961c  | 70.03 | Bra000218 | A03-9.967  | 11 |
| R3 | RS2CL7278s | 70.4  | Bra000211 | A03-9.913  | 11 |
| R3 | RS2CL4292s | 70.81 | Bra000190 | A03-9.82   | 11 |
| R3 | RGC6864c   | 71.16 | Bra000222 | A03-10.001 | 11 |
| R3 | RS2CL1086s | 72.51 | Bra000300 | A03-10.438 | 11 |
| R3 | RS2CL5384s | 72.63 | Bra000311 | A03-10.508 | 11 |
| R3 | RGC1367c   | 73.14 | Bra000302 | A03-10.45  | 11 |
| R3 | RSS2543    | 73.19 | Bra000248 | A03-10.152 | 11 |
| R3 | RSS0860    | 73.29 | Bra000256 | A03-10.215 | 11 |
| R3 | RS2CL2414s | 73.89 | Bra000339 | A03-10.644 | 11 |
| R3 | RSS1018    | 74.26 | Bra000283 | A03-10.351 | 11 |
| R3 | RGC4056c   | 74.38 | Bra037728 | A04-18.143 | 11 |
| R3 | RGC5105c   | 74.79 |           |            | 11 |
| R3 | RGB37c     | 75.59 |           |            | 11 |
| R3 | RS2CL6133s | 75.61 | Bra000365 | A03-10.767 | 11 |
| R3 | RSS0441    | 75.73 | Bra022754 | A03-6.853  | 11 |
| R3 | RS2CL5720s | 76.79 | Bra000393 | A03-10.918 | 11 |
| R3 | RS2CL1398s | 77.71 | Bra000428 | A03-11.078 | 11 |
| R3 | ACGM14     | 78.13 |           |            | 11 |
| R3 | RGC5561c   | 78.52 |           |            | 11 |
| R3 | RSS3186    | 78.72 | Bra004950 | A05-2.616  | 11 |
| R3 | RGC4447c   | 79.22 |           |            | 11 |
| R3 | RS2CL2857s | 79.26 | Bra000508 | A03-11.519 | 11 |
| R3 | RS2CL4154s | 79.62 | Bra000571 | A03-11.855 | 11 |
| R3 | RS2CL4178s | 79.71 | Bra000566 | A03-11.831 | 11 |
| R3 | CC55       | 79.89 |           |            | 11 |
| R3 | RGC15812c  | 79.91 |           |            | 11 |
| R3 | RGC16357c  | 80.36 |           |            | 11 |
| R3 | RS2CL4585s | 80.4  | Bra000524 | A03-11.595 | 11 |
| R3 | RS2CL4689s | 81.12 | Bra000616 | A03-12.095 | 11 |
| R3 | RGC7054c   | 81.5  | Bra000657 | A03-12.346 | 11 |
| R3 | RGC6178c   | 81.75 |           |            | 11 |

|    |            |        |           |            |    |
|----|------------|--------|-----------|------------|----|
| R3 | RGC11372c  | 81.97  |           |            | 11 |
| R3 | RGC13408c  | 81.97  |           |            | 11 |
| R3 | RSS1570    | 82.01  | Bra000483 | A03-11.354 | 11 |
| R3 | RS2CL4158s | 82.28  | Bra000625 | A03-12.143 | 11 |
| R3 | RS2CL7432s | 82.98  | Bra000675 | A03-12.421 | 11 |
| R3 | RGC11660c  | 83.31  | Bra000786 | A03-13.119 | 11 |
| R3 | RGC12742c  | 83.31  |           |            | 11 |
| R3 | RGC1543c   | 83.31  |           |            | 11 |
| R3 | RSS3173    | 83.56  | Bra000651 | A03-12.324 | 11 |
| R3 | RSS3827    | 84.06  | Bra035769 | A05-17.795 | 11 |
| R3 | RS2CL7533s | 84.39  | Bra000701 | A03-12.565 | 11 |
| R3 | RS2CL1880s | 84.55  | Bra000713 | A03-12.642 | 11 |
| R3 | CC34       | 84.56  |           |            | 11 |
| R3 | RGC24282c  | 85.01  | Bra000673 | A03-12.412 | 11 |
| R3 | RSS1161    | 85.63  | Bra000646 | A03-12.27  | 11 |
| R3 | RGC18238c  | 86.01  |           |            | 11 |
| R3 | RGC19084c  | 86.01  | Bra000971 | A03-14.205 | 11 |
| R3 | RGC5954c   | 86.01  | Bra000852 | A03-13.525 | 11 |
| R3 | RGC8553c   | 86.09  | Bra000835 | A03-13.432 | 11 |
| R3 | RS2CL3230s | 86.71  | Bra033138 | A02-16.503 | 11 |
| R3 | RSS1549    | 87.26  | Bra000787 | A03-13.126 | 11 |
| R3 | RGC7922c   | 87.46  | Bra000932 | A03-14.018 | 11 |
| R3 | RSS0198    | 87.66  | Bra000825 | A03-13.392 | 11 |
| R3 | RS2CL3016s | 88.22  | Bra000842 | A03-13.463 | 11 |
| R3 | CB53H      | 88.66  |           |            | 11 |
| R3 | RGB2123c   | 89.04  | Bra022768 | A03-6.948  | 11 |
| R3 | RS2CL3633s | 89.42  | Bra000940 | A03-14.064 | 11 |
| R3 | RS2CL2659s | 89.47  | Bra000947 | A03-14.109 | 11 |
| R3 | RS2CL2865s | 89.84  | Bra000884 | A03-13.717 | 11 |
| R3 | RSS3644    | 90.06  | Bra000895 | A03-13.792 | 11 |
| R3 | RS2CL2009s | 90.52  | Bra000867 | A03-13.605 | 11 |
| R3 | RGC11410c  | 90.76  | Bra000868 | A03-13.618 | 11 |
| R3 | RS2CL6931s | 92.01  | Bra000950 | A03-14.121 | 11 |
| R3 | RGC8634c   | 93.98  |           |            |    |
| R3 | RSS3933    | 97.66  |           |            |    |
| R3 | RS2CL5949s | 98.6   | Bra037722 | A04-18.176 |    |
| R3 | RGC5211c   | 100.2  |           |            |    |
| R3 | RS2CL6711s | 101.22 | Bra000388 | A03-10.892 |    |
| R4 | RSS1627    | 0      | Bra023968 | A03-28.583 |    |
| R4 | RGC355c    | 4.7    |           |            |    |
| R4 | CA83H      | 5.5    |           |            |    |
| R4 | ACGM20     | 8.8    |           |            |    |
| R4 | RS2CL966s  | 9.32   | Bra033596 | A06-25.01  |    |
| R4 | CD72cH     | 9.6    |           |            |    |
| R4 | RS2CL2691s | 10.56  | Bra010695 | A08-15.25  |    |

|    |            |       |           |            |    |
|----|------------|-------|-----------|------------|----|
| R4 | RSS1586    | 11.7  | Bra011552 | A01-1.712  |    |
| R4 | RS2CL5798s | 11.98 | Bra019211 | A03-25.712 | 12 |
| R4 | RSS2559    | 12    | Bra017742 | A03-30.194 | 12 |
| R4 | RGC2155c   | 12.54 | Bra024154 | A03-27.312 | 12 |
| R4 | RGA1914s   | 12.79 |           |            | 12 |
| R4 | RGC4083c   | 13.03 |           |            | 12 |
| R4 | RS2CL2103s | 13.47 | Bra017761 | A03-30.349 | 12 |
| R4 | RS2CL3614s | 14.17 | Bra011378 | A01-2.455  | 12 |
| R4 | RS2CL4701s | 14.25 | Bra024062 | A03-27.94  | 12 |
| R4 | RSS1544    | 14.4  | Bra017782 | A03-30.493 | 12 |
| R4 | RGB10057c  | 14.55 | Bra017840 | A03-30.918 | 12 |
| R4 | RGC14416c  | 14.55 |           |            | 12 |
| R4 | RS2CL4127s | 14.75 | Bra017687 | A03-29.818 | 12 |
| R4 | RS2CL5450s | 14.9  | Bra037006 | A03-29.039 | 12 |
| R4 | CD34aH     | 15    |           |            | 12 |
| R4 | RGA1981s   | 15.06 |           |            | 12 |
| R4 | RS2CL3293s | 15.26 | Bra037007 | A03-29.037 | 12 |
| R4 | RS2CL5513s | 15.43 | Bra024057 | A03-27.973 | 12 |
| R4 | RS2CL1187s | 15.53 | Bra009857 | A06-18.337 | 12 |
| R4 | RS2CL1264s | 15.6  | Bra024012 | A03-28.265 | 12 |
| R4 | RS2CL1262s | 15.72 | Bra018929 | A06-1.213  | 12 |
| R4 | RS2CL6586s | 15.76 | Bra024020 | A03-28.226 | 12 |
| R4 | RS2CL5563s | 15.87 | Bra024058 | A03-27.968 | 12 |
| R4 | RGC1195c   | 16.09 |           |            | 12 |
| R4 | RGC15741c  | 16.09 |           |            | 12 |
| R4 | RGB2673c   | 16.09 | Bra017646 | A03-29.563 | 12 |
| R4 | RGC9198c   | 16.09 |           |            | 12 |
| R4 | RS2CL1215s | 16.1  | Bra024071 | A03-27.885 | 12 |
| R4 | CC00       | 16.2  |           |            | 12 |
| R4 | CC23       | 16.4  |           |            | 12 |
| R4 | RS2CL1831s | 16.48 | Bra024153 | A03-27.325 | 12 |
| R4 | RS2CL3995s | 16.98 | Bra024183 | A03-27.1   | 12 |
| R4 | S281N      | 17.2  |           |            | 12 |
| R4 | RS2CL1816s | 17.34 | Bra019196 | A03-25.783 | 12 |
| R4 | RS2CL4170s | 17.7  | Bra024230 | A03-26.799 | 12 |
| R4 | RS2CL842s  | 17.86 | Bra019045 | A03-26.608 | 12 |
| R4 | RSS0234    | 17.9  | Bra019039 | A03-26.636 | 12 |
| R4 | RS2CL7584s | 17.95 | Bra019144 | A03-26.114 | 12 |
| R4 | RSS3716    | 18.1  | Bra024209 | A03-26.907 | 12 |
| R4 | RGC22968c  | 18.34 |           |            | 12 |
| R4 | RGC45c     | 18.34 |           |            | 12 |
| R4 | RGC9298c   | 18.34 | Bra019069 | A03-26.503 | 12 |
| R4 | RS2CL4241s | 18.38 | Bra019054 | A03-26.578 | 12 |
| R4 | RSS2439    | 18.9  | Bra019210 | A03-25.718 | 12 |
| R4 | RSS3649    | 19.4  | Bra019250 | A03-25.478 | 12 |
| R4 | RS2CL4850s | 19.57 | Bra019267 | A03-25.395 | 12 |

|    |            |       |           |            |    |
|----|------------|-------|-----------|------------|----|
| R4 | RSS2708    | 20.24 | Bra038769 | A03-24.199 | 12 |
| R4 | RS2CL5615s | 20.76 | Bra019316 | A03-25.051 | 12 |
| R4 | RGC9137c   | 21.04 | Bra033606 | A06-24.971 | 12 |
| R4 | RGC7718c   | 21.77 | Bra038784 | A03-24.083 | 12 |
| R4 | RGC1288c   | 21.99 |           |            | 12 |
| R4 | RGC32871c  | 21.99 | Bra019372 | A03-24.637 | 12 |
| R4 | RGC4257c   | 21.99 |           |            | 12 |
| R4 | RS2CL8540s | 22.23 | Bra021503 | A03-24.5   | 12 |
| R4 | RSS2783    | 22.26 | Bra012523 | A03-23.847 | 12 |
| R4 | RSS2409    | 22.76 | Bra012558 | A03-23.578 | 12 |
| R4 | RSS2474    | 22.76 | Bra012558 | A03-23.578 | 12 |
| R4 | RSS0031    | 23.16 | Bra012581 | A03-23.458 | 12 |
| R4 | RS2CL5025s | 23.45 | Bra038761 | A03-24.251 | 12 |
| R4 | RGB16843c  | 23.8  |           |            | 12 |
| R4 | RS2CL7051s | 23.81 | Bra038792 | A03-24.053 | 12 |
| R4 | RSS0858    | 23.99 | Bra012600 | A03-23.315 | 12 |
| R4 | RGC3995c   | 24.04 |           |            | 12 |
| R4 | RS2CL4212s | 24.6  | Bra012563 | A03-23.557 | 12 |
| R4 | RSS3799    | 24.91 | Bra012624 | A03-23.141 | 12 |
| R4 | RS2CL3610s | 25.64 | Bra012661 | A03-22.899 | 12 |
| R4 | RSS3591    | 25.75 | Bra038503 | A01-10.628 | 12 |
| R4 | RGB5549c   | 25.85 | Bra012621 | A03-23.195 | 12 |
| R4 | RSS2846    | 26.7  | Bra012600 | A03-23.315 | 12 |
| R4 | RS2CL7588s | 26.76 | Bra012619 | A03-23.204 | 12 |
| R4 | RGC1455c   | 27.17 |           |            | 12 |
| R4 | RS2CL4804s | 27.78 | Bra012663 | A03-22.895 | 12 |
| R4 | RS2CL3599s | 28.31 | Bra012684 | A03-22.775 | 12 |
| R4 | RS2CL4311s | 28.72 | Bra012671 | A03-22.859 | 12 |
| R4 | CB92       | 28.89 |           |            | 12 |
| R4 | RS2CL6294s | 28.95 | Bra012680 | A03-22.8   | 12 |
| R4 | RS2CL2726s | 29.25 | Bra012722 | A03-22.587 | 12 |
| R4 | RGA173s    | 29.73 | Bra012755 | A03-22.432 | 12 |
| R4 | RS2CL4162s | 30.03 | Bra012752 | A03-22.454 | 12 |
| R4 | RSS1249_a  | 30.36 | Bra038895 | A01-15.621 | 12 |
| R4 | RS2CL3606s | 30.37 | Bra012807 | A03-22.151 | 12 |
| R4 | RSS3924    | 30.9  | Bra012857 | A03-21.921 | 12 |
| R4 | RS2CL7525s | 30.95 | Bra012848 | A03-21.952 | 12 |
| R4 | RS2CL2655s | 31.06 | Bra012867 | A03-21.885 | 12 |
| R4 | RS2CL2361s | 31.12 | Bra012861 | A03-21.912 | 12 |
| R4 | Rs2CL2299s | 31.5  | Bra012885 | A03-21.764 | 12 |
| R4 | RGC21796c  | 31.84 |           |            | 12 |
| R4 | RGC11816c  | 32.14 |           |            | 12 |
| R4 | RGC5691c   | 32.14 | Bra012781 | A03-22.324 | 12 |
| R4 | RS2CL3326s | 32.59 | Bra012978 | A03-21.259 | 12 |
| R4 | CA87       | 32.86 |           |            | 12 |
| R4 | RS2CL4218s | 32.9  | Bra012951 | A03-21.388 | 12 |

|    |            |       |           |            |    |
|----|------------|-------|-----------|------------|----|
| R4 | RS2CL7603s | 33.33 | Bra012993 | A03-21.186 | 12 |
| R4 | RS2CL7351s | 33.61 | Bra012989 | A03-21.212 | 12 |
| R4 | RSS1971    | 33.82 | Bra012946 | A03-21.407 | 12 |
| R4 | RS2CL6125s | 34.15 | Bra009722 | A06-17.463 |    |
| R4 | RGB15964c  | 34.42 |           |            |    |
| R4 | RGC1115c   | 34.88 | Bra012996 | A03-21.174 |    |
| R4 | RGC21614c  | 34.88 |           |            |    |
| R4 | RGC9615c   | 34.88 |           |            |    |
| R4 | RSS2202    | 35.03 | Bra009703 | A06-17.266 | 13 |
| R4 | RS2CL5759s | 35.06 | Bra009698 | A06-17.235 | 13 |
| R4 | RGC17618c  | 35.16 | Bra013017 | A03-20.999 | 13 |
| R4 | RSS0067    | 35.99 | Bra009671 | A06-17.087 | 13 |
| R4 | RSS0178    | 36.89 | Bra009758 | A06-17.672 | 13 |
| R4 | RSS1636    | 37.29 | Bra009799 | A06-17.962 | 13 |
| R4 | RS2CL1832s | 39.19 | Bra009858 | A06-18.342 | 13 |
| R4 | CA24       | 41.29 |           |            | 13 |
| R4 | RGC21459c  | 42.16 | Bra009833 | A06-18.202 | 13 |
| R4 | RS2CL1097s | 42.88 | Bra009895 | A06-18.572 | 13 |
| R4 | RS2CL5633s | 43.92 | Bra009965 | A06-18.971 | 13 |
| R4 | RGC13382c  | 44.44 | Bra010028 | A06-19.332 | 13 |
| R4 | RGC17631c  | 44.44 | Bra037432 | A06-20.045 | 13 |
| R4 | RGC2699c   | 44.44 | Bra038947 | A06-18.744 | 13 |
| R4 | RS2CL4419s | 45.05 | Bra037428 | A06-20.022 | 13 |
| R4 | RGC4505c   | 45.62 |           |            | 13 |
| R4 | RS2CL3258s | 46.01 | Bra037467 | A06-20.233 | 13 |
| R4 | RGA2287s   | 46.24 |           |            | 13 |
| R4 | RS2CL5222s | 46.57 | Bra037461 | A06-20.21  | 13 |
| R4 | RS2CL2500s | 46.6  | Bra037509 | A06-20.404 | 13 |
| R4 | RS2CL3360s | 46.73 | Bra037480 | A06-20.282 | 13 |
| R4 | CF16       | 47    |           |            | 13 |
| R4 | RS2CL6318s | 47.2  | Bra037511 | A06-20.413 | 13 |
| R4 | RGC18965c  | 47.36 | Bra025307 | A06-21.194 | 13 |
| R4 | RS2CL2926s | 47.48 | Bra037506 | A06-20.386 | 13 |
| R4 | RS2CL6239s | 47.77 | Bra037492 | A06-20.341 | 13 |
| R4 | RSS2705    | 47.83 | Bra036216 | A09-1.911  | 13 |
| R4 | RSS1127    | 48.13 | Bra025383 | A06-20.787 | 13 |
| R4 | RSS3772    | 48.43 |           |            | 13 |
| R4 | RGB3765c   | 48.58 | Bra025314 | A06-21.167 | 13 |
| R4 | RS2CL7398s | 49.31 | Bra037490 | A06-20.331 | 13 |
| R4 | RSS0396    | 49.97 | Bra025248 | A06-21.51  | 13 |
| R4 | RSS0839    | 49.97 | Bra032981 | A02-21.97  | 13 |
| R4 | RSS1418    | 50.35 |           |            | 13 |
| R4 | RSS3863    | 50.35 | Bra025260 | A06-21.46  | 13 |
| R4 | RGC21483c  | 50.8  | Bra030338 | A04-9.388  | 13 |
| R4 | RSS0936    | 50.82 | Bra025233 | A06-21.561 | 13 |
| R4 | RSS1675    | 51.12 |           |            | 13 |

|    |            |       |           |                      |    |
|----|------------|-------|-----------|----------------------|----|
| R4 | RS2CL2021s | 52.06 | Bra025265 | A06-21.422           | 13 |
| R4 | RGB25198c  | 52.36 | Bra037518 | A06-20.438           | 13 |
| R4 | RSS0033    | 53.1  | Bra025181 | A06-21.843           | 13 |
| R4 | RS2CL5851s | 53.33 | Bra025284 | A06-21.324           | 13 |
| R4 | RGC7341c   | 53.7  | Bra025283 | A06-21.331           | 13 |
| R4 | RS2CL4350s | 53.79 | Bra025239 | A06-21.541           | 13 |
| R4 | CB05       | 53.92 |           |                      | 13 |
| R4 | RGC2885c   | 54.63 |           |                      | 13 |
| R4 | RS2CL6990s | 54.9  | Bra025201 | A06-21.737           | 13 |
| R4 | RGC10051c  | 55.53 | Bra025179 | A06-21.85            | 13 |
| R4 | CD11aH     | 56.72 |           |                      | 13 |
| R4 | RS2CL2925s | 56.83 | Bra025140 | A06-22.193           | 13 |
| R4 | RGC17385c  | 57.02 |           |                      | 13 |
| R4 | RSS3637    | 57.69 | Bra037460 | A06-20.208           | 13 |
| R4 | Rs2CL2178s | 58.46 | Bra024808 | A06-22.493           | 13 |
| R4 | RGC2356c   | 59.5  | Bra030204 | A04-10.397           | 13 |
| R4 | RSS3616    | 59.85 | Bra033693 | A06-24.531           | 13 |
| R4 | RS2CL5879s | 60.87 | Bra024887 | A06-23.042           | 13 |
| R4 | RS2CL5717s | 61.19 | Bra024854 | A06-22.787           | 13 |
| R4 | RGB4922c   | 61.51 | Bra022133 | A02-19.284           | 13 |
| R4 | RGC9577c   | 62.06 |           |                      | 13 |
| R4 | Z30817     | 62.64 |           |                      | 13 |
| R4 | RS2CL7473s | 62.89 | Bra024927 | A06-23.216           | 13 |
| R4 | RGC10583c  | 63.35 | Bra024908 | A06-23.149           | 13 |
| R4 | RGC2146c   | 63.35 | Bra024868 | A06-22.918           | 13 |
| R4 | RGC3356c   | 63.35 | Bra024849 | A06-22.746           | 13 |
| R4 | CB39       | 64.56 |           |                      | 13 |
| R4 | RS2CL1232s | 64.61 | Bra024975 | A06-23.428           | 13 |
| R4 | RSS0369    | 65.4  | Bra025078 | A06-23.966           | 13 |
| R4 | CA83       | 66    |           |                      | 13 |
| R4 | CB86       | 66.6  |           |                      | 13 |
| R4 | RSS3516    | 68.1  | Bra033680 | A06-24.603           | 13 |
| R4 | RSS1061    | 69.2  | Bra028126 | A04-6.316            | 13 |
| R4 | RSS0008    | 69.5  |           |                      | 13 |
| R4 | RSS3919    | 69.6  |           |                      | 13 |
| R4 | Rs2CL1980s | 70.35 | Bra040776 | Scaffold000256-0.021 | 13 |
| R4 | RS2CL5596s | 71.35 | Bra002165 | A10-11.22            | 13 |
| R4 | CC19N      | 71.79 |           |                      | 13 |
| R4 | RGC11405c  | 72.03 | Bra025106 | A06-24.124           | 13 |
| R4 | RS2CL1344s | 72.44 | Bra039506 | Scaffold000167-0.011 | 13 |
| R4 | RGC3002c   | 72.8  | Bra025067 | A06-23.91            | 13 |
| R4 | RGC21423c  | 73.12 |           |                      | 13 |
| R4 | RS2CL4378s | 73.31 | Bra033712 | A06-24.419           | 13 |
| R4 | CD72b      | 73.38 |           |                      | 13 |
| R4 | RGA1767s   | 73.47 |           |                      | 13 |
| R4 | RS2CL6532s | 73.68 | Bra027532 | A09-11.586           | 13 |

|    |            |       |           |                      |    |
|----|------------|-------|-----------|----------------------|----|
| R4 | RS2CL738s  | 74.44 | Bra033654 | A06-24.728           | 13 |
| R4 | RS2CL7671s | 74.49 | Bra033667 | A06-24.668           | 13 |
| R4 | RS2CL4635s | 74.62 | Bra033656 | A06-24.722           | 13 |
| R4 | Rs2CL2052s | 74.78 | Bra033749 | A06-24.209           | 13 |
| R4 | RGC10110c  | 75.04 |           |                      | 13 |
| R4 | RGB10350c  | 75.04 | Bra035359 | Scaffold000104-0.158 | 13 |
| R4 | RGC13794c  | 75.04 |           |                      | 13 |
| R4 | RGC2328c   | 75.04 | Bra033663 | A06-24.689           | 13 |
| R4 | RGC2715c   | 75.04 | Bra033700 | A06-24.484           | 13 |
| R4 | RGC3886c   | 75.04 |           |                      |    |
| R4 | RGC7139c   | 75.04 | Bra035365 | Scaffold000104-0.211 |    |
| R4 | RGC8082c   | 75.04 |           |                      |    |
| R4 | RS2CL713s  | 75.22 | Bra034466 | Scaffold000096-0.054 |    |
| R4 | RS2CL6965s | 75.46 | Bra017881 | A03-31.278           |    |
| R4 | RS2CL2947s | 75.76 | Bra035354 | Scaffold000104-0.114 |    |
| R4 | RS2CL2388s | 76.25 | Bra038153 | Scaffold000140-0.14  |    |
| R4 | RGC9337c   | 76.67 | Bra025617 | A04-7.83             | 14 |
| R4 | RGC3045c   | 77.19 | Bra028125 | A04-6.306            | 14 |
| R4 | RGC8922c   | 77.19 |           |                      | 14 |
| R4 | RS2CL6195s | 77.6  | Bra028124 | A04-6.291            | 14 |
| R4 | RS2CL5121s | 78.06 | Bra028241 | A04-7.357            | 14 |
| R4 | RSS3739    | 78.06 | Bra025454 | A04-9.016            | 14 |
| R4 | RGC15937c  | 78.59 |           |                      | 14 |
| R4 | RGC2894c   | 78.59 | Bra025507 | A04-8.641            | 14 |
| R4 | RGC364c    | 78.59 |           |                      | 14 |
| R4 | RGC6719c   | 78.59 |           |                      | 14 |
| R4 | RGC6966c   | 78.59 | Bra004818 | A05-1.944            | 14 |
| R4 | RGB7858c   | 78.59 |           |                      | 14 |
| R4 | RGC4610c   | 78.64 |           |                      | 14 |
| R4 | RS2CL4033s | 79.02 | Bra025654 | A04-7.59             | 14 |
| R4 | CD63H      | 79.42 |           |                      | 14 |
| R4 | RS2CL5842s | 79.52 | Bra025636 | A04-7.731            | 14 |
| R4 | RGC12174c  | 79.74 |           |                      | 14 |
| R4 | RSS2079    | 80.1  | Bra025446 | A04-9.052            | 14 |
| R4 | RGB11177c  | 80.11 | Bra025599 | A04-7.937            | 14 |
| R4 | RSS0347    | 80.49 | Bra030308 | A04-9.579            | 14 |
| R4 | RS2CL3470s | 80.8  | Bra025599 | A04-7.937            | 14 |
| R4 | RGC2472c   | 81.04 | Bra028221 | A04-7.146            | 14 |
| R4 | Rs2CL2508s | 81.4  | Bra025600 | A04-7.912            | 14 |
| R4 | CC15       | 81.96 |           |                      | 14 |
| R4 | OPE01      | 82.76 |           |                      | 14 |
| R4 | RSS1284    | 83.86 |           |                      | 14 |
| R4 | RS2CL1961s | 84.09 | Bra025446 | A04-9.052            | 14 |
| R4 | CC89       | 84.65 |           |                      | 14 |
| R4 | RS2CL4014s | 85.38 | Bra030249 | A04-9.995            | 14 |
| R4 | RSS3847    | 85.63 | Bra039195 | A09-33.1             | 14 |

|    |            |        |           |            |    |
|----|------------|--------|-----------|------------|----|
| R4 | RGC15702c  | 85.89  | Bra021660 | A04-13.79  | 14 |
| R4 | RSS1710    | 86.62  |           |            | 14 |
| R4 | RSS3515    | 87.12  | Bra039237 | A09-32.854 | 14 |
| R4 | RS2CL3313s | 88.51  | Bra032174 | A04-10.705 | 14 |
| R4 | RGC24823c  | 88.69  |           |            | 14 |
| R4 | RGC6716c   | 88.69  | Bra021783 | A04-14.543 | 14 |
| R4 | RSS3297    | 89.19  | Bra032055 | A04-11.576 | 14 |
| R4 | RGC32186c  | 89.65  | Bra032035 | A04-11.719 | 14 |
| R4 | RGB520c    | 90.52  | Bra035700 | A04-12.801 | 14 |
| R4 | CA98       | 90.86  |           |            | 14 |
| R4 | RGB14019c  | 91.07  | Bra021831 | A04-14.868 | 14 |
| R4 | RSS3234    | 91.65  | Bra034298 | A04-12.102 | 14 |
| R4 | RSS1064    | 91.85  | Bra034298 | A04-12.102 | 14 |
| R4 | RGC27467c  | 92.02  |           |            | 14 |
| R4 | RGC2779c   | 92.02  |           |            | 14 |
| R4 | RGC5481c   | 92.02  | Bra034373 | A04-12.569 | 14 |
| R4 | RGC206c    | 92.28  |           |            | 14 |
| R4 | RGC2343c   | 92.28  | Bra021691 | A04-13.976 | 14 |
| R4 | RGC2932c   | 92.28  | Bra021779 | A04-14.519 | 14 |
| R4 | RS2CL6948s | 92.3   | Bra021743 | A04-14.314 | 14 |
| R4 | RSS2397    | 92.42  | Bra034308 | A04-12.186 | 14 |
| R4 | RS2CL4453s | 93.08  | Bra034290 | A04-12.06  | 14 |
| R4 | RGC13764c  | 93.44  | Bra021941 | A04-15.403 | 14 |
| R4 | RS2CL3226s | 94.1   | Bra011936 | A07-13.399 | 14 |
| R4 | RGC139c    | 94.27  |           |            | 14 |
| R4 | RSS0625    | 94.3   |           |            | 14 |
| R4 | RSS1628    | 94.3   | Bra034346 | A04-12.412 | 14 |
| R4 | RSS2491    | 94.3   | Bra034371 | A04-12.555 | 14 |
| R4 | RSS3741    | 94.3   | Bra034368 | A04-12.551 | 14 |
| R4 | RGC1537c   | 94.36  | Bra021855 | A04-14.978 | 14 |
| R4 | RGC6353c   | 94.36  |           |            | 14 |
| R4 | RS2CL6090s | 94.57  | Bra018371 | A05-7.817  | 14 |
| R4 | RS2CL2598s | 94.76  | Bra003592 | A07-17.242 | 14 |
| R4 | RS2CL6646s | 94.86  | Bra034325 | A04-12.27  | 14 |
| R4 | RS2CL5488s | 94.98  | Bra034309 | A04-12.191 | 14 |
| R4 | RS2CL8917s | 95.07  | Bra039995 | A04-13.367 | 14 |
| R4 | Rs2CL1743s | 95.16  | Bra021685 | A04-13.948 | 14 |
| R4 | RSS0393    | 95.22  | Bra022772 | A03-6.981  | 14 |
| R4 | RSS0341    | 95.82  | Bra005031 | A05-3.073  | 14 |
| R4 | RSS2667    | 95.82  | Bra021715 | A04-14.165 | 14 |
| R4 | CC43b      | 96.52  |           |            | 14 |
| R4 | RSS3109    | 97.62  | Bra021723 | A04-14.217 | 14 |
| R4 | CA15       | 99.42  |           |            | 14 |
| R4 | RS2CL3689s | 100.43 | Bra021688 | A04-13.966 | 14 |
| R4 | RGA1556s   | 100.61 | Bra021821 | A04-14.809 | 14 |
| R4 | RS2CL2599s | 100.81 | Bra034343 | A04-12.404 | 14 |



|    |            |        |           |            |    |
|----|------------|--------|-----------|------------|----|
| R4 | RSS2245    | 101.28 | Bra021654 | A04-13.771 | 14 |
| R4 | RS2CL2069s | 101.29 | Bra021837 | A04-14.898 | 14 |
| R4 | RS2CL6037s | 101.56 | Bra022937 | A03-7.867  | 14 |
| R4 | RS2CL4491s | 102.02 | Bra039965 | A04-13.208 | 14 |
| R4 | RGC16154c  | 102.46 | Bra021870 | A04-15.056 | 14 |
| R4 | RGC19350c  | 102.46 |           |            | 14 |
| R4 | RGC9063c   | 102.46 |           |            | 14 |
| R4 | RS2CL3466s | 102.69 | Bra021850 | A04-14.966 | 14 |
| R4 | Rs2CL2383s | 103.26 | Bra021896 | A04-15.191 | 14 |
| R4 | RSS3247    | 103.38 | Bra021634 | A04-13.669 | 14 |
| R4 | RS2CL3308s | 103.73 | Bra021912 | A04-15.265 | 14 |
| R4 | RS2CL2278s | 104.72 | Bra017321 | A04-15.49  | 14 |
| R4 | RS2CL8405s | 105.31 | Bra017292 | A04-15.617 | 14 |
| R4 | CC56a      | 105.59 |           |            | 14 |
| R4 | RS2CL6277s | 106.41 | Bra017241 | A04-15.908 | 14 |
| R4 | RS2CL3794s | 106.71 | Bra017215 | A04-16.103 | 14 |
| R4 | CD24       | 107.49 |           |            | 14 |
| R4 | RS2CL2462s | 107.89 | Bra017113 | A04-16.659 | 14 |
| R4 | RS2CL4251s | 107.91 | Bra017107 | A04-16.684 | 14 |
| R4 | RGC17710c  | 108.16 | Bra017130 | A04-16.562 | 14 |
| R4 | RGC16310c  | 108.21 | Bra017139 | A04-16.472 | 14 |
| R4 | RGC2194c   | 108.21 | Bra017307 | A04-15.538 | 14 |
| R4 | RGC2833c   | 108.21 |           |            | 14 |
| R4 | RGC4391c   | 108.21 | Bra017245 | A04-15.874 | 14 |
| R4 | RGC5031c   | 108.21 |           |            | 14 |
| R4 | RGC6220c   | 108.21 |           |            | 14 |
| R4 | RS2CL2730s | 108.25 | Bra017135 | A04-16.526 | 14 |
| R4 | RS2CL6009s | 108.46 | Bra017109 | A04-16.676 | 14 |
| R4 | RS2CL1897s | 108.78 | Bra017126 | A04-16.581 | 14 |
| R4 | RS2CL5094s | 109.2  | Bra017008 | A04-17.272 | 14 |
| R4 | RGC9763c   | 109.49 | Bra017297 | A04-15.601 | 14 |
| R4 | RSS3305    | 109.57 | Bra016897 | A04-17.815 | 14 |
| R4 | RGC2574c   | 109.94 |           |            | 14 |
| R4 | RS2CL1636s | 110.31 | Bra016989 | A04-17.346 | 14 |
| R4 | RSS3500    | 111.08 | Bra017018 | A04-17.213 | 14 |
| R4 | RGB17458c  | 111.59 |           |            | 14 |
| R4 | RS2CL5146s | 112.69 | Bra016946 | A04-17.566 | 14 |
| R4 | RGC9723c   | 113.08 |           |            | 14 |
| R4 | RGC12230c  | 113.41 | Bra016976 | A04-17.406 | 14 |
| R4 | RS2CL1956s | 114.11 | Bra016860 | A04-17.969 | 14 |
| R4 | RS2CL5598s | 114.15 |           |            | 14 |
| R4 | RS2CL2277s | 114.21 | Bra016862 | A04-17.966 | 14 |
| R4 | RS2CL8851s | 114.3  |           |            | 14 |
| R4 | RS2CL7217s | 115.77 | Bra037664 | A04-18.379 | 14 |
| R4 | RGC2987c   | 116.69 | Bra004887 | A05-2.305  | 14 |
| R4 | RSS1902    | 116.96 | Bra016981 | A04-17.384 | 14 |

|    |            |        |           |            |    |
|----|------------|--------|-----------|------------|----|
| R4 | RSS2415    | 117.66 | Bra017005 | A04-17.282 | 14 |
| R4 | RS2CL1437s | 118.37 | Bra039291 | A04-18.852 | 14 |
| R4 | RGC11873c  | 118.75 | Bra037647 | A04-18.448 | 14 |
| R4 | RSS2929    | 119.67 | Bra016935 | A04-17.638 | 14 |
| R4 | RGC6749c   | 120.83 |           |            | 14 |
| R4 | RSS3668    | 120.97 | Bra016891 | A04-17.839 | 14 |
| R4 | RS2CL2439s | 121.57 | Bra011819 | A01-0.386  | 14 |
| R4 | RSS0993    | 122.28 | Bra037715 | A04-18.206 | 14 |
| R4 | RGA1715s   | 123.77 |           |            | 14 |
| R4 | RSS1828    | 124.02 | Bra040312 | A04-18.654 | 14 |
| R4 | RSS3914    | 124.62 | Bra039338 | A04-18.676 | 14 |
| R4 | RGC4219c   | 125    |           |            |    |
| R4 | RS2CL983s  | 125.63 | Bra032770 | A04-5.073  | 15 |
| R4 | RS2CL3277s | 126.29 | Bra007025 | A09-28.395 | 15 |
| R4 | RGC14440c  | 126.65 |           |            | 15 |
| R4 | RS2CL7183s | 126.95 | Bra014828 | A04-3.435  | 15 |
| R4 | RGC14398c  | 127.38 |           |            | 15 |
| R4 | OPT09a     | 127.47 |           |            | 15 |
| R4 | RS2CL4168s | 127.88 | Bra019639 | A04-4.163  | 15 |
| R4 | RS2CL1373s | 128.17 | Bra040688 | A04-4.004  | 15 |
| R4 | RGC7805c   | 128.8  |           |            | 15 |
| R4 | RS2CL5077s | 128.82 | Bra022419 | A05-18.536 | 15 |
| R4 | RS2CL2423s | 129.15 | Bra014841 | A04-3.55   | 15 |
| R4 | RSS0375    | 129.25 |           |            | 15 |
| R4 | RS2CL2532s | 129.29 | Bra014819 | A04-3.379  | 15 |
| R4 | RS2CL7410s | 129.43 |           |            | 15 |
| R4 | RS2CL6216s | 129.9  | Bra014719 | A04-2.505  | 15 |
| R4 | RSS2818    | 130.28 | Bra016728 | A08-18.916 | 15 |
| R4 | RGC12577c  | 130.65 |           |            | 15 |
| R4 | RGC12869c  | 130.65 |           |            | 15 |
| R4 | RGC2383c   | 130.65 |           |            | 15 |
| R4 | RGC6866c   | 130.65 |           |            | 15 |
| R4 | RGC8508c   | 130.65 |           |            | 15 |
| R4 | RS2CL1846s | 130.8  | Bra014808 | A04-3.305  | 15 |
| R4 | CA35b      | 130.81 |           |            | 15 |
| R4 | RS2CL2717s | 131.12 | Bra014721 | A04-2.513  | 15 |
| R4 | RSS3394    | 131.17 | Bra033462 | A04-4.678  | 15 |
| R4 | RSS3897    | 131.17 | Bra033420 | A04-4.387  | 15 |
| R4 | RS2CL1003s | 131.21 | Bra014681 | A04-2.202  | 15 |
| R4 | RS2CL1386s | 131.67 | Bra014741 | A04-2.736  | 15 |
| R4 | RS2CL4891s | 131.97 | Bra015981 | A07-23.242 | 15 |
| R4 | RSS0649    | 132.1  | Bra039808 | A04-3.76   | 15 |
| R4 | RSS0371    | 132.6  | Bra003163 | A07-14.916 | 15 |
| R4 | RS2CL4267s | 133.5  | Bra014601 | A04-1.697  | 15 |
| R4 | RSS2126    | 134.1  | Bra007274 | A09-29.825 | 15 |
| R4 | RSS0912    | 134.5  | Bra014427 | A04-0.589  | 15 |

|    |            |        |           |                      |    |
|----|------------|--------|-----------|----------------------|----|
| R4 | RS2CL2291s | 134.57 | Bra014598 | A04-1.682            | 15 |
| R4 | RS2CL2308s | 135.38 | Bra021448 | A04-19.23            | 15 |
| R4 | RGC151c    | 135.73 | Bra014543 | A04-1.327            | 15 |
| R4 | RGC16913c  | 135.73 |           |                      | 15 |
| R4 | RGC4940c   | 135.73 | Bra014385 | A04-0.272            | 15 |
| R4 | RGC7607c   | 135.73 | Bra040433 | A04-0.091            | 15 |
| R4 | CC79       | 135.87 |           |                      | 15 |
| R4 | RS2CL5873s | 136.57 | Bra040435 | A04-0.085            | 15 |
| R4 | RSS1537    | 136.72 | Bra040440 | A04-0.047            | 15 |
| R4 | RGC10060c  | 137.23 | Bra014508 | A04-1.093            | 15 |
| R4 | RS2CL2821s | 137.64 | Bra014410 | A04-0.381            | 15 |
| R4 | OPT16a     | 138.02 |           |                      | 15 |
| R4 | RGA1700s   | 138.08 |           |                      | 15 |
| R4 | Rs2CL2077s | 138.8  | Bra040448 | A04-0.016            | 15 |
| R4 | RS2CL1358s | 140.21 | Bra014406 | A04-0.363            | 15 |
| R4 | RGC2546c   | 141.22 | Bra014619 | A04-1.809            | 15 |
| R4 | RGA125s    | 142.16 |           |                      |    |
|    |            |        |           |                      |    |
| R5 | RSS3015    | 0      | Bra001221 | A03-15.42            | 16 |
| R5 | RSS3061    | 0.3    | Bra000989 | A03-14.308           | 16 |
| R5 | RSS1661    | 0.8    | Bra040292 | A01-25.62            | 16 |
| R5 | RSS3244    | 0.8    | Bra001137 | A03-14.944           | 16 |
| R5 | RSS3245    | 0.8    | Bra001159 | A03-15.037           | 16 |
| R5 | RSS0292    | 1.1    | Bra039144 | A05-25.141           | 16 |
| R5 | CD34bH     | 1.4    |           |                      | 16 |
| R5 | RSS0017    | 1.6    | Bra029787 | A05-23.003           | 16 |
| R5 | CA74H      | 2      |           |                      | 16 |
| R5 | RSS1674    | 2.1    | Bra001406 | A03-16.249           | 16 |
| R5 | CD71       | 2.5    |           |                      | 16 |
| R5 | N97067     | 2.8    |           |                      | 16 |
| R5 | Rs2CL1745s | 2.81   | Bra001526 | A03-16.881           | 16 |
| R5 | CD20       | 3.1    |           |                      | 16 |
| R5 | RSS0662_a  | 4      | Bra039342 | Scaffold000164-0.012 | 16 |
| R5 | RSS1054    | 4.2    | Bra030394 | A05-10.94            | 16 |
| R5 | RSS1457    | 4.6    | Bra001664 | A03-17.768           | 16 |
| R5 | RS2CL8651s | 4.64   | Bra001194 | A03-15.26            | 16 |
| R5 | RSS3450    | 5      | Bra001530 | A03-16.899           | 16 |
| R5 | RSS0662_b  | 5.5    | Bra039342 | Scaffold000164-0.012 | 16 |
| R5 | RS2CL7919s | 5.86   | Bra001153 | A03-15.021           | 16 |
| R5 | RS2CL6011s | 6.39   | Bra001186 | A03-15.218           | 16 |
| R5 | CC37bH     | 6.5    |           |                      | 16 |
| R5 | RGC1111c   | 7.06   | Bra001418 | A03-16.306           | 16 |
| R5 | RGC1381c   | 7.06   | Bra034869 | A05-22.536           | 16 |
| R5 | RGC21684c  | 7.06   | Bra001229 | A03-15.453           | 16 |
| R5 | RGB964c    | 7.06   |           |                      | 16 |
| R5 | RS2CL5773s | 7.17   | Bra001040 | A03-14.519           | 16 |

|    |            |       |           |            |    |
|----|------------|-------|-----------|------------|----|
| R5 | RSS2263    | 7.2   | Bra001813 | A03-18.628 | 16 |
| R5 | RS2CL2901s | 7.31  | Bra001065 | A03-14.597 | 16 |
| R5 | RS2CL3894s | 7.44  | Bra001057 | A03-14.574 | 16 |
| R5 | RSS1183    | 7.9   | Bra001809 | A03-18.615 | 16 |
| R5 | RS2CL4044s | 7.95  | Bra001057 | A03-14.574 | 16 |
| R5 | RS2CL5289s | 8.81  | Bra001411 | A03-16.268 | 16 |
| R5 | Rs2CL1517s | 9.19  | Bra001418 | A03-16.306 | 16 |
| R5 | RSS2534    | 9.7   | Bra001849 | A03-18.877 | 16 |
| R5 | RS2CL6910s | 10.05 | Bra001421 | A03-16.318 | 16 |
| R5 | RS2CL2032s | 11.89 | Bra001505 | A03-16.739 | 16 |
| R5 | RSS0922    | 11.9  | Bra028345 | A01-18.227 | 16 |
| R5 | Pf         | 12.7  |           |            | 16 |
| R5 | RGB2724c   | 12.95 |           |            | 16 |
| R5 | RS2CL4777s | 13.68 | Bra001661 | A03-17.755 | 16 |
| R5 | RGC20584c  | 13.86 |           |            | 16 |
| R5 | RS2CL7144s | 14.51 | Bra001600 | A03-17.321 | 16 |
| R5 | RSS1319    | 15    | Bra013224 | A03-19.798 | 16 |
| R5 | RSS3682    | 15.7  | Bra013241 | A03-19.717 | 16 |
| R5 | Rs2CL2150s | 16.48 | Bra001817 | A03-18.65  | 16 |
| R5 | RSS1795    | 17.9  | Bra013215 | A03-19.85  | 16 |
| R5 | Rs2CL2167s | 18.29 | Bra001952 | A03-19.59  | 16 |
| R5 | RSS2289    | 18.6  | Bra019594 | A06-13.589 | 17 |
| R5 | RSS0310    | 18.8  | Bra019594 | A06-13.589 | 17 |
| R5 | RSS2078_a  | 19.7  | Bra019616 | A06-13.744 | 17 |
| R5 | RSS2459    | 20.3  | Bra010084 | A06-14.267 | 17 |
| R5 | RSS1155    | 20.5  | Bra010053 | A06-13.89  | 17 |
| R5 | RS2CL2345s | 20.91 | Bra013218 | A03-19.828 | 17 |
| R5 | Rs2CL1650s | 21.12 | Bra013219 | A03-19.825 | 17 |
| R5 | RSS0255    | 21.5  | Bra010123 | A06-14.547 | 17 |
| R5 | RS2CL4383s | 21.86 | Bra029925 | A01-14.392 | 17 |
| R5 | RS2CL4098s | 22.38 | Bra019582 | A06-13.458 | 17 |
| R5 | RGA1775s   | 22.64 |           |            | 17 |
| R5 | RSS1293    | 22.7  | Bra024256 | A06-15.187 | 17 |
| R5 | RSS2428    | 22.7  | Bra024255 | A06-15.184 | 17 |
| R5 | RSS1421    | 23    | Bra024270 | A06-15.269 | 17 |
| R5 | RSS2179    | 23.4  | Bra024286 | A06-15.357 | 17 |
| R5 | RSS1445    | 23.6  | Bra024295 | A06-15.388 | 17 |
| R5 | RSS0020    | 24.1  | Bra024331 | A06-15.627 | 17 |
| R5 | RS2CL6459s | 24.65 | Bra038615 | A06-14.804 | 17 |
| R5 | RSS0640    | 25.1  | Bra038639 | A06-14.926 | 17 |
| R5 | RS2CL1107s | 25.48 | Bra038614 | A06-14.8   | 17 |
| R5 | RS2CL2656s | 27.64 | Bra024274 | A06-15.279 | 17 |
| R5 | RSS3462    | 27.7  | Bra013229 | A03-19.775 | 17 |
| R5 | RS2CL5063s | 28.95 | Bra024326 | A06-15.606 | 17 |
| R5 | RS2CL7234s | 29.1  | Bra024320 | A06-15.544 | 17 |
| R5 | RS2CL7712s | 29.4  | Bra024325 | A06-15.596 | 17 |

|    |            |       |           |                      |    |
|----|------------|-------|-----------|----------------------|----|
| R5 | RS2CL4145s | 29.82 | Bra024416 | A06-16.264           | 17 |
| R5 | RS2CL7340s | 30.09 |           |                      | 17 |
| R5 | RGC6520c   | 30.12 |           |                      | 17 |
| R5 | RS2CL3444s | 30.63 | Bra024389 | A06-16.052           | 17 |
| R5 | RGC54c     | 31.11 | Bra024345 | A06-15.701           | 17 |
| R5 | RSS0173    | 31.6  | Bra040870 | Scaffold000289-0.024 | 17 |
| R5 | RSS1336    | 31.6  | Bra002086 | A07-1.97             | 17 |
| R5 | RS2CL5210s | 31.68 | Bra013051 | A03-20.791           | 17 |
| R5 | RSS0575    | 31.7  | Bra040870 | Scaffold000289-0.024 | 17 |
| R5 | RSS0125    | 31.8  | Bra009653 | A06-17.017           | 17 |
| R5 | RS2CL6408s | 31.85 | Bra009666 | A06-17.065           | 17 |
| R5 | RGC11501c  | 32.07 |           |                      | 17 |
| R5 | RGC1596c   | 32.07 | Bra024337 | A06-15.656           | 17 |
| R5 | RGC15962c  | 32.07 | Bra024442 | A06-16.402           | 17 |
| R5 | RSS2665    | 32.2  | Bra002021 | A07-2.493            | 17 |
| R5 | Rs2CL1966s | 32.35 | Bra024511 | A06-16.942           | 17 |
| R5 | RSS2209    | 32.6  | Bra013048 | A03-20.805           | 18 |
| R5 | RGC8188c   | 33.13 |           |                      | 18 |
| R5 | RSS3635    | 33.8  | Bra024325 | A06-15.596           | 18 |
| R5 | RGC1147c   | 34.2  |           |                      | 18 |
| R5 | RSS0647    | 34.8  | Bra013161 | A03-20.149           | 18 |
| R5 | RGC11447c  | 35.27 | Bra013141 | A03-20.25            | 18 |
| R5 | RGB3806c   | 35.27 |           |                      | 18 |
| R5 | RSS0380    | 36    | Bra013186 | A03-19.999           | 18 |
| R5 | RS2CL1106s | 36.01 | Bra018068 | A06-9.706            |    |
| R5 | RGB8510c   | 36.65 |           |                      |    |
| R5 | RSS1774    | 37.1  |           |                      |    |
| R5 | RS2CL804s  | 37.28 | Bra014361 | A08-1.409            |    |
| R5 | RSS0192    | 37.5  | Bra031790 | A09-36.497           |    |
| R5 | RSS3177    | 39.4  | Bra030365 | A05-10.72            | 19 |
| R5 | RSS2660    | 40.2  | Bra030366 | A05-10.722           | 19 |
| R5 | RSS0609    | 40.3  | Bra030366 | A05-10.722           | 19 |
| R5 | RS2CL8976s | 40.42 | Bra040815 | Scaffold000267-0.035 | 19 |
| R5 | RGB2659c   | 40.99 |           |                      | 19 |
| R5 | R30624b    | 41.1  |           |                      | 19 |
| R5 | RGC8374c   | 41.67 | Bra030433 | A05-11.272           | 19 |
| R5 | RSS1763_a  | 42.5  | Bra014663 | A04-2.103            | 19 |
| R5 | CC67bH     | 42.8  |           |                      | 19 |
| R5 | RS2CL5232s | 42.8  | Bra030429 | A05-11.246           | 19 |
| R5 | RSS0485    | 43.5  | Bra039648 | Scaffold000172-0.212 | 19 |
| R5 | RGA91s     | 43.58 | Bra014251 | A08-2.196            | 19 |
| R5 | RSS0430_a  | 43.8  |           |                      | 19 |
| R5 | RGC12639c  | 44.01 | Bra032247 | A05-12.493           | 19 |
| R5 | RGC4480c   | 44.3  |           |                      | 19 |
| R5 | CD72bH     | 45.1  |           |                      | 19 |
| R5 | RGC9986c   | 45.6  |           |                      | 19 |

|    |            |       |           |            |    |
|----|------------|-------|-----------|------------|----|
| R5 | RSS3072    | 46.2  | Bra040663 | A05-13.239 | 19 |
| R5 | RGC17999c  | 46.55 | Bra007713 | A09-32.022 | 20 |
| R5 | RGA1661s   | 47.18 | Bra038401 | A09-15.313 | 20 |
| R5 | RGC9094c   | 47.89 | Bra007614 | A09-31.562 | 20 |
| R5 | RSS2310    | 47.9  | Bra007762 | A09-32.293 | 20 |
| R5 | Rs2CL2263s | 49.11 | Bra032210 | A05-13.009 | 20 |
| R5 | RSS3250    | 49.8  | Bra007669 | A09-31.852 | 20 |
| R5 | RS2CL4099s | 50.48 | Bra007758 | A09-32.259 | 20 |
| R5 | RSS1955    | 50.6  | Bra003487 | A07-16.727 | 20 |
| R5 | RS2CL3592s | 51.19 | Bra007736 | A09-32.146 | 20 |
| R5 | RSS3666    | 52.1  | Bra019756 | A06-4.607  | 20 |
| R5 | RGB19108c  | 52.6  |           |            | 20 |
| R5 | RGC347c    | 52.6  |           |            | 20 |
| R5 | RGC8606c   | 52.6  | Bra007563 | A09-31.322 | 20 |
| R5 | RS2CL3943s | 53.18 | Bra007677 | A09-31.882 | 20 |
| R5 | CA64       | 54.1  |           |            | 20 |
| R5 | RS2CL6006s | 54.22 | Bra007609 | A09-31.525 | 20 |
| R5 | RSS1195    | 56.1  | Bra007514 | A09-31.097 | 20 |
| R5 | RGC19763c  | 56.37 | Bra014532 | A04-1.266  | 20 |
| R5 | RSS2188    | 56.5  | Bra007494 | A09-31.008 | 20 |
| R5 | RSS0574    | 57.4  | Bra007432 | A09-30.691 | 20 |
| R5 | RSS2974    | 57.4  | Bra007423 | A09-30.652 | 20 |
| R5 | Rs2CL2589s | 58.74 | Bra007067 | A09-28.649 | 20 |
| R5 | RSS1763    | 59.2  | Bra014663 | A04-2.103  | 20 |
| R5 | RGC6470c   | 59.95 |           |            | 20 |
| R5 | RSS0154    | 60.3  | Bra003314 | A07-15.839 | 20 |
| R5 | RS2CL4004s | 60.33 | Bra007154 | A09-29.113 | 20 |
| R5 | RSS2249    | 61.2  | Bra007276 | A09-29.832 | 20 |
| R5 | RSS0193    | 61.3  | Bra007276 | A09-29.832 | 20 |
| R5 | CD23       | 61.8  |           |            | 20 |
| R5 | CC61H      | 62.8  |           |            | 20 |
| R5 | OPR17      | 63.3  |           |            | 20 |
| R5 | RGC4546c   | 63.81 | Bra007323 | A09-30.1   | 20 |
| R5 | RSS0866    | 64.18 | Bra007221 | A09-29.572 | 20 |
| R5 | RS2CL7551s | 64.45 | Bra007273 | A09-29.823 | 20 |
| R5 | CA66H      | 64.85 |           |            | 20 |
| R5 | RGC5978c   | 64.88 | Bra007177 | A09-29.276 | 20 |
| R5 | RGB1306c   | 65.46 |           |            | 20 |
| R5 | RSS0068    | 65.49 | Bra007218 | A09-29.562 | 20 |
| R5 | RGC12711c  | 65.74 |           |            | 20 |
| R5 | RS2CL1241s | 65.81 | Bra007173 | A09-29.242 | 20 |
| R5 | ACGM16     | 65.98 |           |            | 20 |
| R5 | RS2CL3809s | 66.03 | Bra003204 | A07-15.142 | 20 |
| R5 | RGC16642c  | 66.43 |           |            | 20 |
| R5 | CD81H      | 66.83 |           |            | 20 |
| R5 | RGA1790s   | 67.11 |           |            | 20 |

|    |            |       |           |            |    |
|----|------------|-------|-----------|------------|----|
| R5 | RGC21710c  | 67.56 |           |            | 20 |
| R5 | CD78       | 67.87 |           |            | 20 |
| R5 | RGC5664c   | 67.98 |           |            | 20 |
| R5 | RS2CL1583s | 68.25 | Bra007027 | A09-28.413 | 20 |
| R5 | RGC948c    | 68.41 | Bra019446 | A06-11.868 | 20 |
| R5 | RSS2089    | 69.01 | Bra007053 | A09-28.574 | 20 |
| R5 | RGC439c    | 69.14 |           |            | 20 |
| R5 | RS2CL1103s | 69.16 |           |            | 20 |
| R5 | RGC14010c  | 69.74 |           |            | 20 |
| R5 | RS2CL4593s | 70.03 | Bra006989 | A09-28.219 | 20 |
| R5 | RSS2970    | 70.12 |           |            | 20 |
| R5 | RSS0769    | 70.32 | Bra007002 | A09-28.278 | 20 |
| R5 | RS2CL2778s | 70.36 | Bra019447 | A06-11.882 | 20 |
| R5 | RS2CL4036s | 70.75 | Bra006965 | A09-28.077 | 20 |
| R5 | RSS0295    | 71.17 | Bra019445 | A06-11.858 | 20 |
| R5 | RSS3324    | 71.17 | Bra006938 | A09-27.861 | 20 |
| R5 | RS2CL7602s | 71.33 | Bra019491 | A06-12.561 |    |
| R5 | RS2CL3400s | 71.45 | Bra031740 | A09-36.737 | 21 |
| R5 | RSS1246    | 71.94 | Bra019447 | A06-11.882 | 21 |
| R5 | RSS3089    | 73.14 | Bra018096 | A06-9.921  | 21 |
| R5 | RSS3043    | 73.74 | Bra031705 | A09-36.905 | 21 |
| R5 | RSS2679    | 73.84 | Bra031722 | A09-36.808 | 21 |
| R5 | RSS2831    | 74.04 | Bra031747 | A09-36.704 | 21 |
| R5 | RS2CL5573s | 75.09 | Bra026884 | A09-35.862 | 21 |
| R5 | RS2CL8653s | 75.77 | Bra031965 | A05-24.585 | 21 |
| R5 | RGB9734c   | 77.27 |           |            | 21 |
| R5 | RGB299c    | 77.57 | Bra031693 | A09-36.971 | 21 |
| R5 | RGC9453c   | 77.74 | Bra031684 | A09-37.013 | 21 |
| R5 | RSS0810    | 77.98 | Bra026779 | A09-35.405 | 21 |
| R5 | RGB12346c  | 78.96 |           |            | 21 |
| R5 | CD32       | 79    |           |            | 21 |
| R5 | Rs2CL2329s | 79.26 | Bra031632 | A09-37.241 | 21 |
| R5 | RSS2090    | 79.62 | Bra015511 | A10-0.848  | 21 |
| R5 | RGA1887s   | 79.93 | Bra031575 | A09-37.512 | 21 |
| R5 | RS2CL7437s | 80.03 | Bra020251 | A02-4.844  | 21 |
| R5 | CB25aN     | 80.23 |           |            | 21 |
| R5 | RS2CL3418s | 80.53 | Bra031558 | A09-37.593 | 21 |
| R5 | RS2CL6413s | 80.74 | Bra031573 | A09-37.529 | 21 |
| R5 | RS2CL4294s | 81.65 | Bra032424 | A09-37.782 | 21 |
| R5 | RSS0606    | 81.69 | Bra022183 | A05-19.945 | 21 |
| R5 | RGC5898c   | 81.86 |           |            | 21 |
| R5 | RSS3723    | 81.9  | Bra015308 | A10-2.088  | 21 |
| R5 | N95848     | 82.6  |           |            | 21 |
| R5 | RGC6482c   | 82.83 | Bra032468 | A09-37.964 | 21 |
| R5 | RS2CL5033s | 82.88 | Bra030520 | A08-20.715 | 21 |
| R5 | RGC8128c   | 83.47 |           |            | 21 |

|    |            |        |           |            |    |
|----|------------|--------|-----------|------------|----|
| R5 | RSS2992    | 83.74  | Bra032591 | A09-38.511 | 21 |
| R5 | RS2CL3856s | 83.87  | Bra032547 | A09-38.322 | 21 |
| R5 | RGC20400c  | 83.92  | Bra032588 | A09-38.501 | 21 |
| R5 | RS2CL3486s | 84.57  | Bra032640 | A09-38.737 | 21 |
| R5 | RGB2163c   | 85.28  | Bra033236 | A10-3.395  | 21 |
| R5 | RSS1973    | 86.18  | Bra032653 | A09-38.794 | 21 |
| R5 | RS2CL876s  | 86.59  | Bra032650 | A09-38.782 | 21 |
| R5 | RGC18337c  | 86.85  | Bra033217 | A10-3.498  | 21 |
| R5 | RS2CL3834s | 86.87  | Bra032659 | A09-38.812 | 21 |
| R5 | RS2CL1002s | 87.15  | Bra032668 | A09-38.865 | 21 |
| R5 | RGC13305c  | 87.84  |           |            |    |
| R5 | RS2CL4231s | 88.98  | Bra034432 | A05-14.025 | 22 |
| R5 | RS2CL8487s | 89.15  | Bra034448 | A05-14.235 | 22 |
| R5 | RGC1982c   | 89.53  |           |            | 22 |
| R5 | RGC6032c   | 89.53  | Bra034446 | A05-14.224 | 22 |
| R5 | RGC7124c   | 89.53  | Bra010195 | A05-14.605 | 22 |
| R5 | RS2CL6191s | 89.91  | Bra010203 | A05-14.53  | 22 |
| R5 | RGA1924s   | 90.52  | Bra010195 | A05-14.605 | 22 |
| R5 | RSS1355    | 92.03  | Bra012223 | A07-11.44  | 22 |
| R5 | RSS2290    | 93.13  | Bra010152 | A05-15.216 | 22 |
| R5 | RS2CL5313s | 93.45  | Bra033870 | A05-15.621 | 22 |
| R5 | Rs2CL1513s | 94.83  | Bra030114 | A07-8.682  |    |
| R5 | RGA2486s   | 95.37  |           |            |    |
| R5 | RSS3328    | 95.74  | Bra027315 | A05-21.006 |    |
| R5 | RGA2386s   | 95.75  |           |            |    |
| R5 | RS2CL3218s | 96.23  | Bra015149 | A07-5.281  | 23 |
| R5 | RS2CL3664s | 96.44  | Bra015135 | A07-5.419  | 23 |
| R5 | CC59       | 97.52  |           |            | 23 |
| R5 | RSS2770    | 98.32  | Bra022856 | A03-7.422  | 23 |
| R5 | RGC1058c   | 98.62  | Bra027325 | A05-21.041 | 23 |
| R5 | RSS1146    | 99.14  | Bra015086 | A07-5.806  | 23 |
| R5 | RS2CL7110s | 99.54  | Bra015104 | A07-5.684  | 23 |
| R5 | RS2CL1096s | 99.98  | Bra006672 | A03-4.558  | 23 |
| R5 | RGC2286c   | 100.36 | Bra015091 | A07-5.774  | 23 |
| R5 | RGC1397c   | 100.58 |           |            | 23 |
| R5 | RGC6433c   | 101.17 | Bra023433 | A02-2.328  | 23 |
| R5 | RSS2008    | 101.24 | Bra015061 | A07-6.071  | 23 |
| R5 | RSS1381    | 103.04 |           |            |    |
| R5 | RGC7374c   | 104.07 | Bra037544 | A01-20.958 |    |
| R5 | RGC7955c   | 104.07 |           |            |    |
| R5 | RSS3453    | 105.19 | Bra031294 | A05-16.971 | 24 |
| R5 | RS2CL1017s | 105.83 | Bra014972 | A07-6.896  | 24 |
| R5 | RS2CL2718s | 108.19 | Bra031283 | A05-17.067 | 24 |
| R5 | RSS2080    | 108.93 | Bra039947 | A05-16.503 | 24 |
| R5 | RS2CL6248s | 109.54 | Bra031279 | A05-17.101 | 24 |
| R5 | RGC9070c   | 109.89 |           |            | 24 |



|    |            |        |           |                      |    |
|----|------------|--------|-----------|----------------------|----|
| R5 | RSS0835    | 110.06 | Bra031313 | A05-16.796           | 24 |
| R5 | RS2CL4474s | 110.66 | Bra041034 | Scaffold000402-0.001 | 24 |
| R5 | RSS1657    | 111.19 | Bra031269 | A05-17.177           | 24 |
| R5 | RS2CL3771s | 111.23 | Bra033915 | A05-16.146           | 24 |
| R5 | RSS0799    | 111.5  | Bra001804 | A03-18.595           | 24 |
| R5 | RSS1437    | 112.1  | Bra035786 | A05-17.918           | 24 |
| R5 | RGC4231c   | 112.77 | Bra035745 | A05-17.609           | 24 |
| R5 | RGC3008c   | 113.12 |           |                      | 24 |
| R5 | RGC15844c  | 113.61 |           |                      | 24 |
| R5 | RS2CL7568s | 113.78 | Bra035799 | A05-17.983           | 24 |
| R5 | RSS2076    | 113.98 |           |                      | 24 |
| R5 | RGC793c    | 114.27 | Bra031273 | A05-17.147           | 24 |
| R5 | RGC4102c   | 114.8  | Bra035779 | A05-17.852           | 24 |
| R5 | RGB28864c  | 115.22 | Bra022381 | A05-18.776           | 24 |
| R5 | CA04a      | 115.62 |           |                      | 24 |
| R5 | RGC24023c  | 115.72 | Bra022445 | A05-18.351           | 24 |
| R5 | RGC25363c  | 115.72 | Bra031305 | A05-16.866           | 24 |
| R5 | RGC7157c   | 115.72 | Bra031331 | A05-16.655           | 24 |
| R5 | RSS1610    | 116.43 | Bra022436 | A05-18.423           | 24 |
| R5 | RS2CL4228s | 116.53 | Bra022416 | A05-18.563           | 24 |
| R5 | RSS2461    | 117.75 | Bra022338 | A05-19.028           | 24 |
| R5 | RSS3878    | 117.75 | Bra022358 | A05-18.912           | 24 |
| R5 | RS2CL3657s | 117.86 | Bra022326 | A05-19.106           | 24 |
| R5 | RSS3562    | 117.95 | Bra022336 | A05-19.041           | 24 |
| R5 | RGC1797c   | 118.51 | Bra027293 | A05-20.881           | 24 |
| R5 | RSS0491    | 118.75 | Bra022255 | A05-19.52            | 24 |
| R5 | RSS0607    | 118.85 | Bra022246 | A05-19.586           | 24 |
| R5 | RGC5241c   | 119.04 | Bra022212 | A05-19.758           | 24 |
| R5 | RGC9697c   | 119.69 |           |                      | 24 |
| R5 | RSS0794    | 120.35 | Bra022321 | A05-19.139           | 24 |
| R5 | RS2CL2631s | 120.38 | Bra022204 | A05-19.815           | 24 |
| R5 | RGC27939c  | 120.85 | Bra022188 | A05-19.925           | 24 |
| R5 | RGC2709c   | 120.96 |           |                      | 24 |
| R5 | RGC1165c   | 120.98 | Bra027247 | A05-20.657           | 24 |
| R5 | RGC15300c  | 120.98 |           |                      | 24 |
| R5 | RGB17888c  | 120.98 | Bra027250 | A05-20.667           | 24 |
| R5 | RGC25318c  | 120.98 | Bra021117 | A01-23.03            | 24 |
| R5 | RGC15052c  | 121.1  |           |                      | 24 |
| R5 | RS2CL3363s | 121.34 | Bra022228 | A05-19.658           | 24 |
| R5 | RSS0599    | 121.85 | Bra027174 | A05-20.257           | 24 |
| R5 | RGC7029c   | 122.02 | Bra027173 | A05-20.252           | 24 |
| R5 | Rs2CL1713s | 122.09 | Bra027168 | A05-20.197           | 24 |
| R5 | RS2CL2036s | 122.64 | Bra022160 | A05-20.133           | 24 |
| R5 | RGC20412c  | 123.21 |           |                      | 24 |
| R5 | RGC3985c   | 123.21 | Bra027369 | A05-21.286           | 24 |
| R5 | CB14       | 123.25 |           |                      | 24 |

|    |            |        |           |            |    |
|----|------------|--------|-----------|------------|----|
| R5 | Rs2CL1337s | 123.75 | Bra022223 | A05-19.674 | 24 |
| R5 | RSS2087    | 124.05 |           |            | 24 |
| R5 | RSS2733    | 124.15 |           |            | 24 |
| R5 | RS2CL3095s | 125.44 | Bra027325 | A05-21.041 | 24 |
| R5 | RGC7851c   | 125.81 |           |            | 24 |
| R5 | Rs2CL1671s | 126.08 | Bra027294 | A05-20.89  | 24 |
| R5 | RSS3895    | 126.45 | Bra027355 | A05-21.214 | 24 |
| R5 | RS2CL1405s | 126.99 | Bra027357 | A05-21.221 | 24 |
| R5 | RSS1697    | 127.25 | Bra027313 | A05-20.998 | 24 |
| R5 | RGC1110c   | 128.21 |           |            | 24 |
| R5 | RGC5424c   | 128.21 |           |            | 24 |
| R5 | CA74       | 128.25 |           |            | 24 |
| R5 | RS2CL4817s | 128.42 | Bra027410 | A05-21.492 | 24 |
| R5 | RSS0139    | 129.25 | Bra021517 | A01-23.998 | 24 |
| R5 | RS2CL3543s | 129.83 | Bra027432 | A05-21.614 | 24 |
| R5 | RS2CL6094s | 130.35 | Bra027437 | A05-21.631 | 24 |
| R5 | RGB90c     | 130.75 | Bra027409 | A05-21.484 | 24 |
| R5 | RSS0258    | 131.05 | Bra027421 | A05-21.543 | 24 |
| R5 | RS2CL2801s | 131.77 | Bra034804 | A05-22.228 | 24 |
| R5 | ACGM13     | 132.35 |           |            | 24 |
| R5 | RS2CL2046s | 132.49 | Bra034812 | A05-22.255 | 24 |
| R5 | RS2CL6493s | 132.63 | Bra034805 | A05-22.232 | 24 |
| R5 | RSS1153    | 132.95 | Bra034716 | A05-21.843 | 24 |
| R5 | RSS3828    | 133.15 | Bra034748 | A05-21.989 | 24 |
| R5 | RS2CL5254s | 133.67 | Bra034844 | A05-22.408 | 24 |
| R5 | CA04b      | 133.85 |           |            | 24 |
| R5 | RS2CL5065s | 133.9  | Bra034849 | A05-22.44  | 24 |
| R5 | RS2CL4091s | 134.28 | Bra034863 | A05-22.511 | 24 |
| R5 | RS2CL4365s | 134.82 | Bra029859 | A05-22.696 | 24 |
| R5 | CD63       | 135.05 |           |            | 24 |
| R5 | Rs2CL2530s | 135.15 | Bra034863 | A05-22.511 | 24 |
| R5 | OPE03b     | 135.25 |           |            | 24 |
| R5 | RGC15061c  | 136.17 |           |            | 24 |
| R5 | RGB2029c   | 136.17 |           |            | 24 |
| R5 | RGB5705c   | 136.17 |           |            | 24 |
| R5 | RSS2040    | 136.35 | Bra034845 | A05-22.423 | 24 |
| R5 | RS2CL7735s | 136.88 | Bra029743 | A05-23.175 | 24 |
| R5 | RS2CL6813s | 137.44 | Bra029805 | A05-22.946 | 24 |
| R5 | RGC4124c   | 137.99 |           |            | 24 |
| R5 | CC45a      | 138.45 |           |            | 24 |
| R5 | RSS0084    | 139.15 | Bra029867 | A05-22.663 | 24 |
| R5 | RS2CL5459s | 139.19 | Bra029703 | A05-23.321 | 24 |
| R5 | RS2CL5893s | 139.4  | Bra029671 | A05-23.446 | 24 |
| R5 | RS2CL1331s | 139.71 | Bra029670 | A05-23.45  | 24 |
| R5 | RSS1903    | 140.05 | Bra029765 | A05-23.083 | 24 |
| R5 | RGA1658s   | 140.08 | Bra029667 | A05-23.463 | 24 |

|    |            |        |           |                      |    |
|----|------------|--------|-----------|----------------------|----|
| R5 | RS2CL1047s | 140.55 | Bra029675 | A05-23.436           | 24 |
| R5 | RSS1242    | 140.85 | Bra029704 | A05-23.319           | 24 |
| R5 | RSS1489    | 140.85 | Bra001347 | A03-15.967           | 24 |
| R5 | RS2CL5612s | 141.78 | Bra029596 | A05-23.813           | 24 |
| R5 | CF19       | 142.05 |           |                      | 24 |
| R5 | RS2CL4128s | 142.13 | Bra029602 | A05-23.771           | 24 |
| R5 | RS2CL1648s | 143.3  | Bra020801 | A05-24.172           | 24 |
| R5 | RGC16329c  | 143.35 | Bra039440 | A05-24.316           | 24 |
| R5 | RGC2498c   | 143.35 |           |                      | 24 |
| R5 | RGC4098c   | 143.35 | Bra020774 | A05-24.07            | 24 |
| R5 | RGC4195c   | 143.35 | Bra039413 | A05-24.227           | 24 |
| R5 | RGA2325s   | 144.54 | Bra007069 | A09-28.657           | 24 |
| R5 | RSS3694    | 144.65 | Bra020752 | A05-23.971           | 24 |
| R5 | RSS1361    | 145.65 | Bra029603 | A05-23.768           | 24 |
| R5 | RS2CL5529s | 145.69 | Bra001113 | A03-14.837           | 24 |
| R5 | RS2CL5178s | 146.41 | Bra040406 | Scaffold000203-0.056 | 24 |
| R5 | RS2CL6670s | 146.79 | Bra031946 | A05-24.507           | 24 |
| R5 | RGB1089c   | 147.24 | Bra040210 | Scaffold000191-0.124 | 24 |
| R5 | RS2CL5532s | 147.65 | Bra031968 | A05-24.595           | 24 |
| R5 | RS2CL6564s | 148.26 | Bra039164 | A05-25.052           | 24 |
| R5 | RS2CL4868s | 148.73 | Bra040594 | A05-24.937           | 24 |
| R5 | Rs2CL2284s | 149.12 | Bra039118 | A05-25.237           | 24 |
| R5 | RGC908c    | 149.41 | Bra039123 | A05-25.216           | 24 |
| R5 | RSS2296    | 149.85 | Bra040410 | Scaffold000203-0.07  | 24 |
| R5 | RSS3026    | 149.95 | Bra040193 | Scaffold000191-0.05  | 24 |
| R5 | RSS0361    | 150.15 | Bra039464 | A05-24.436           | 24 |
| R5 | Rs2CL1785s | 150.52 | Bra039182 | A05-24.96            | 24 |
| R5 | RSS0292_a  | 154.15 | Bra039144 | A05-25.141           | 24 |
| R5 | RGB1952c   | 154.21 | Bra036450 | A01-26.253           |    |
| R6 | Rs2CL1800s | 0      | Bra034122 | A01-24.89            | 25 |
| R6 | RGA2109s   | 1.63   |           |                      | 25 |
| R6 | RSS0284    | 3.02   |           |                      | 25 |
| R6 | RGC7282c   | 3.44   | Bra021485 | A01-26.675           | 25 |
| R6 | RGC13867c  | 4.8    |           |                      | 25 |
| R6 | CA22       | 5.12   |           |                      | 25 |
| R6 | RGC5600c   | 5.27   | Bra036502 | A07-0.036            | 25 |
| R6 | RSS1106    | 6.52   | Bra036497 | A07-0.064            | 25 |
| R6 | RSS0750    | 6.52   | Bra039176 | A05-24.986           | 25 |
| R6 | RS2CL1259s | 7.06   | Bra040701 | Scaffold000237-0.018 | 25 |
| R6 | RS2CL2749s | 7.84   | Bra021411 | A01-26.478           | 25 |
| R6 | RSS0881    | 8.02   | Bra036503 | A07-0.035            | 25 |
| R6 | RSS1501    | 8.02   | Bra021420 | A01-26.508           | 25 |
| R6 | RGC13819c  | 8.2    | Bra034092 | A01-25.04            | 25 |
| R6 | RSS3965_a  | 8.82   | Bra040135 | A01-25.995           | 25 |
| R6 | Rs2CL1793s | 9      | Bra021373 | A01-26.372           | 25 |

|    |            |       |           |                      |    |
|----|------------|-------|-----------|----------------------|----|
| R6 | RSS0818    | 9.12  | Bra040298 | A01-25.598           | 25 |
| R6 | RGB6680c   | 9.17  |           |                      | 25 |
| R6 | RS2CL6567s | 9.92  | Bra040531 | Scaffold000215-0.038 | 25 |
| R6 | RSS2859    | 10.32 | Bra029757 | A05-23.106           | 25 |
| R6 | RSS2760    | 10.32 | Bra034078 | A01-25.096           | 25 |
| R6 | RSS0864    | 10.32 |           |                      | 25 |
| R6 | RGC6359c   | 10.59 | Bra034092 | A01-25.04            | 25 |
| R6 | RS2CL4163s | 10.95 | Bra040285 | A01-25.638           | 25 |
| R6 | RS2CL3329s | 11.58 | Bra040376 | A01-25.483           | 25 |
| R6 | RS2CL5007s | 12.62 | Bra040019 | A01-25.439           | 25 |
| R6 | RGC10902c  | 12.91 | Bra034046 | A01-25.244           | 25 |
| R6 | RS2CL5739s | 13.18 | Bra034093 | A01-25.038           | 25 |
| R6 | RGC12804c  | 13.49 | Bra034046 | A01-25.244           | 25 |
| R6 | RSS2138    | 13.72 | Bra038724 | A01-24.295           | 25 |
| R6 | RGB4153c   | 13.85 | Bra034081 | A01-25.088           | 25 |
| R6 | RSS0662    | 13.92 | Bra039342 | Scaffold000164-0.012 | 25 |
| R6 | RSS2505    | 14.32 | Bra038738 | A01-24.244           | 25 |
| R6 | RS2CL5533s | 14.67 | Bra002039 | A07-2.348            | 25 |
| R6 | RS2CL4358s | 14.98 | Bra034153 | A01-24.73            | 25 |
| R6 | RGC2728c   | 15.34 |           |                      | 25 |
| R6 | RS2CL4648s | 16.17 | Bra039394 | Scaffold000164-0.26  | 25 |
| R6 | RGC5774c   | 16.49 |           |                      | 25 |
| R6 | RGC12486c  | 16.98 | Bra039379 | Scaffold000164-0.195 | 25 |
| R6 | CC68       | 17.43 |           |                      | 25 |
| R6 | RGC6279c   | 17.74 | Bra001368 | A03-16.051           | 25 |
| R6 | RS2CL3679s | 17.81 | Bra021593 | A01-23.485           | 25 |
| R6 | RGC395c    | 18.06 |           |                      | 25 |
| R6 | RS2CL1088s | 18.31 | Bra021110 | A01-23.106           | 25 |
| R6 | RS2CL1149s | 18.56 | Bra021125 | A01-22.993           | 25 |
| R6 | RGC10056c  | 18.77 | Bra038724 | A01-24.295           | 25 |
| R6 | RGC6186c   | 19.41 | Bra021144 | A01-22.921           | 25 |
| R6 | RGC12389c  | 20.04 |           |                      | 25 |
| R6 | RGC16041c  | 20.04 |           |                      | 25 |
| R6 | RGC9621c   | 20.04 |           |                      | 25 |
| R6 | RGC4166c   | 20.04 |           |                      | 25 |
| R6 | RS2CL3998s | 20.73 | Bra021222 | A01-22.436           | 25 |
| R6 | RSS2497    | 21.32 | Bra037588 | A01-21.309           | 25 |
| R6 | RSS0895    | 21.82 | Bra038260 | A01-20.416           | 25 |
| R6 | RGA107s    | 22.47 |           |                      | 25 |
| R6 | RSS2680    | 22.71 | Bra023895 | A01-20.047           | 25 |
| R6 | RSS1367    | 22.81 | Bra023821 | A01-19.357           | 25 |
| R6 | RSS3306    | 22.81 | Bra023902 | A01-20.078           | 25 |
| R6 | RSS3125    | 23.01 | Bra023895 | A01-20.047           | 25 |
| R6 | RS2CL8378s | 23.28 | Bra038236 | A01-20.559           | 25 |
| R6 | RSS3489    | 23.61 |           |                      | 25 |
| R6 | RS2CL5725s | 24.27 | Bra021300 | A01-21.858           | 25 |

|    |            |       |           |                      |    |
|----|------------|-------|-----------|----------------------|----|
| R6 | RSS0768    | 24.6  | Bra023830 | A01-19.421           | 25 |
| R6 | RS2CL1483s | 25.01 | Bra023854 | A01-19.616           | 25 |
| R6 | RS2CL6241s | 26.23 | Bra023862 | A01-19.69            | 25 |
| R6 | RS2CL7817s | 26.73 | Bra023854 | A01-19.616           | 25 |
| R6 | RGA1973s   | 26.81 |           |                      | 25 |
| R6 | RGC1312c   | 27    | Bra038237 | A01-20.554           | 25 |
| R6 | RGC2219c   | 27    |           |                      | 25 |
| R6 | RGC4977c   | 27.32 |           |                      | 25 |
| R6 | RS2CL6432s | 27.84 | Bra023817 | A01-19.34            | 25 |
| R6 | CA09a      | 27.86 |           |                      | 25 |
| R6 | Rs2CL2337s | 28.18 | Bra023732 | A01-18.6             | 25 |
| R6 | RSS3301    | 28.35 | Bra023830 | A01-19.421           | 25 |
| R6 | RS2CL7813s | 28.43 | Bra028324 | A01-18.404           | 25 |
| R6 | RGB5240c   | 28.79 | Bra021246 | A01-22.251           | 25 |
| R6 | RGA1878s   | 29.4  |           |                      | 25 |
| R6 | RS2CL8063s | 29.63 | Bra031448 | A01-17.187           | 25 |
| R6 | RS2CL4703s | 30.21 | Bra028361 | A01-18.041           | 25 |
| R6 | RSS0518    | 30.33 | Bra031401 | A01-17.617           | 25 |
| R6 | Rs2CL1678s | 30.94 | Bra031502 | A01-16.784           | 25 |
| R6 | RS2CL4308s | 31.06 | Bra031523 | A01-16.588           | 25 |
| R6 | RGC10301c  | 31.56 | Bra023813 | A01-19.334           | 25 |
| R6 | RGC6540c   | 31.56 |           |                      | 25 |
| R6 | RGC18316c  | 31.56 | Bra023813 | A01-19.334           | 25 |
| R6 | RGA2264s   | 32.04 | Bra031501 | A01-16.789           | 25 |
| R6 | RSS0124    | 32.73 | Bra035464 | A01-15.801           | 25 |
| R6 | RSS2701    | 32.93 | Bra035427 | A01-16.23            | 25 |
| R6 | RS2CL2683s | 33.48 |           |                      |    |
| R6 | RGB14399c  | 33.64 |           |                      |    |
| R6 | CB22       | 34.22 |           |                      |    |
| R6 | RS2CL2041s | 34.53 | Bra021322 | A05-9.524            |    |
| R6 | RS2CL6287s | 34.63 | Bra038153 | Scaffold000140-0.14  |    |
| R6 | RGC23911c  | 34.9  | Bra028330 | A01-18.312           |    |
| R6 | RS2CL3132s | 35.26 | Bra038170 | Scaffold000140-0.322 |    |
| R6 | RSS3180    | 35.49 | Bra038161 | Scaffold000140-0.214 |    |
| R6 | RSS2724    | 35.99 | Bra037182 | A09-4.805            |    |
| R6 | RS2CL7658s | 36.11 | Bra031520 | A01-16.604           |    |
| R6 | RGC9543c   | 36.42 |           |                      |    |
| R6 | RGB11029c  | 37.42 |           |                      |    |
| R6 | RGC7277c   | 38.15 |           |                      |    |
| R6 | RS2CL2168s | 38.51 | Bra031898 | A02-26.314           | 26 |
| R6 | RSS0895_a  | 39.42 | Bra038260 | A01-20.416           | 26 |
| R6 | Rs2CL1936s | 39.42 | Bra029245 | A02-25.812           | 26 |
| R6 | RGC17695c  | 40.16 |           |                      | 26 |
| R6 | RGC3412c   | 40.71 | Bra029376 | A02-25.011           | 26 |
| R6 | RS2CL4724s | 41.51 | Bra029272 | A02-25.659           | 26 |
| R6 | RSS0727    | 41.58 | Bra029287 | A02-25.575           | 26 |

|    |            |       |           |            |    |
|----|------------|-------|-----------|------------|----|
| R6 | RGC28054c  | 41.79 |           |            | 26 |
| R6 | RGC11504c  | 41.79 |           |            | 26 |
| R6 | RGC5414c   | 41.79 | Bra031805 | A02-26.91  | 26 |
| R6 | RSS2078    | 42.57 | Bra019616 | A06-13.744 | 26 |
| R6 | RGC2511c   | 42.69 | Bra020724 | A02-22.953 | 26 |
| R6 | RGC5771c   | 42.99 |           |            | 26 |
| R6 | RSS0254    | 43.26 | Bra009697 | A06-17.229 | 26 |
| R6 | RGC7411c   | 43.37 | Bra003495 | A07-16.758 | 26 |
| R6 | RS2CL5813s | 43.75 | Bra020472 | A02-24.624 | 26 |
| R6 | Rs2CL2197s | 43.82 | Bra029371 | A02-25.035 | 26 |
| R6 | RGC5509c   | 44.09 |           |            | 26 |
| R6 | RGB17905c  | 44.09 |           |            | 26 |
| R6 | RGC29914c  | 44.09 | Bra020494 | A02-24.476 | 26 |
| R6 | RGC21373c  | 44.09 | Bra020557 | A02-24.04  | 26 |
| R6 | RGC21003c  | 44.09 |           |            | 26 |
| R6 | RGC7441c   | 44.09 |           |            | 26 |
| R6 | RGB12188c  | 44.09 |           |            | 26 |
| R6 | RGB4736c   | 44.09 | Bra020737 | A02-22.861 | 26 |
| R6 | RGC7478c   | 44.09 |           |            | 26 |
| R6 | RGC6399c   | 44.09 |           |            | 26 |
| R6 | RGC5236c   | 44.09 | Bra009983 | A06-19.082 | 26 |
| R6 | RGC10969c  | 44.09 | Bra020587 | A02-23.875 | 26 |
| R6 | RGC4352c   | 44.13 |           |            | 26 |
| R6 | RS2CL3740s | 44.73 | Bra020529 | A02-24.205 | 26 |
| R6 | RGB11249c  | 45.18 | Bra033016 | A02-22.194 | 26 |
| R6 | RGC3081c   | 45.61 |           |            | 26 |
| R6 | RS2CL3937s | 46.07 | Bra020621 | A02-23.608 | 26 |
| R6 | RS2CL3306s | 46.23 | Bra020651 | A02-23.395 | 26 |
| R6 | RS2CL3718s | 46.39 | Bra020589 | A02-23.868 | 26 |
| R6 | RS2CL6218s | 46.68 | Bra020628 | A02-23.563 | 26 |
| R6 | RGC1448c   | 47.23 |           |            | 26 |
| R6 | RS2CL6481s | 47.72 | Bra020724 | A02-22.953 | 26 |
| R6 | RS2CL7263s | 48.1  | Bra033092 | A02-22.63  | 26 |
| R6 | RGA1805s   | 48.13 |           |            | 26 |
| R6 | RS2CL7425s | 48.43 | Bra033097 | A02-22.642 | 26 |
| R6 | RS2CL2511s | 49.5  | Bra033089 | A02-22.617 | 26 |
| R6 | Rs2CL2028s | 50.62 | Bra033035 | A02-22.304 | 26 |
| R6 | RS2CL5945s | 51.52 | Bra032932 | A02-21.657 | 26 |
| R6 | RSS2865    | 51.81 | Bra033005 | A02-22.131 | 26 |
| R6 | RS2CL4000s | 52.73 | Bra036345 | A02-21.346 | 26 |
| R6 | RS2CL6161s | 53.18 | Bra036350 | A02-21.265 | 26 |
| R6 | RSS0839_a  | 53.55 | Bra032981 | A02-21.97  | 26 |
| R6 | RGC265c    | 53.78 |           |            | 26 |
| R6 | RGC4004c   | 53.78 | Bra022053 | A02-18.586 | 26 |
| R6 | RGC6170c   | 53.78 |           |            | 26 |
| R6 | RSS3844    | 54.55 | Bra032986 | A02-22.007 | 26 |

|    |            |       |           |                      |    |
|----|------------|-------|-----------|----------------------|----|
| R6 | RS2CL4583s | 54.66 | Bra026577 | A02-20.356           | 26 |
| R6 | RS2CL3419s | 55.3  | Bra026579 | A02-20.329           | 26 |
| R6 | RSS1338    | 55.35 | Bra032984 | A02-21.995           | 26 |
| R6 | RGC2998c   | 56.11 | Bra003495 | A07-16.758           | 26 |
| R6 | CC46H      | 58.44 |           |                      | 26 |
| R6 | RGA1719s   | 58.61 |           |                      | 26 |
| R6 | RSS0049    | 59.34 | Bra026647 | A02-19.64            | 26 |
| R6 | RS2CL3836s | 60.14 | Bra014330 | A08-1.583            | 26 |
| R6 | RSS3534    | 60.64 | Bra024918 | A06-23.181           | 26 |
| R6 | RS2CL2788s | 60.89 | Bra022146 | A02-19.342           | 26 |
| R6 | CD99H      | 61.04 |           |                      | 26 |
| R6 | RGC5574c   | 61.82 |           |                      | 26 |
| R6 | RGC5793c   | 62.06 |           |                      | 26 |
| R6 | RGC3577c   | 62.06 |           |                      | 26 |
| R6 | RS2CL7662s | 62.39 | Bra021992 | A02-17.93            | 26 |
| R6 | RSS3754    | 62.54 | Bra022067 | A02-18.677           | 26 |
| R6 | RS2CL3015s | 63.23 | Bra021979 | A02-17.778           | 26 |
| R6 | CD72a      | 63.43 |           |                      | 26 |
| R6 | OPE03a     | 64.63 |           |                      | 26 |
| R6 | RS2CL4740s | 64.92 | Bra035988 | Scaffold000111-0.299 | 26 |
| R6 | RGC893c    | 65.03 |           |                      | 26 |
| R6 | CB89       | 65.83 |           |                      | 26 |
| R6 | RSS2657    | 67.03 | Bra039620 | A07-1.514            | 26 |
| R6 | RSS3589    | 67.43 | Bra011059 | A01-4.171            | 26 |
| R6 | RGC12381c  | 67.76 |           |                      | 26 |
| R6 | RGC8396c   | 68.5  |           |                      | 26 |
| R6 | RGC24370c  | 68.79 |           |                      | 26 |
| R6 | Rs2CL2226s | 69.23 | Bra041043 | Scaffold000410-0.01  | 26 |
| R6 | RSS2881    | 69.33 | Bra040674 | Scaffold000232-0.015 | 26 |
| R6 | RGC11044c  | 70.26 |           |                      | 26 |
| R6 | RGB10934c  | 71.09 |           |                      | 26 |
| R6 | RSS2217    | 71.42 | Bra038850 | A07-0.854            | 27 |
| R6 | RS2CL1066s | 72.37 | Bra038817 | A07-1.141            | 27 |
| R6 | RSS0782    | 72.42 | Bra017741 | A03-30.19            | 27 |
| R6 | RS2CL7383s | 72.89 | Bra015209 | A07-3.706            | 27 |
| R6 | RS2CL2325s | 73.45 | Bra039913 | A07-1.671            | 27 |
| R6 | CD66       | 73.92 |           |                      | 27 |
| R6 | RS2CL2832s | 73.95 | Bra002080 | A07-2.008            | 27 |
| R6 | RGA2488s   | 74.57 |           |                      | 27 |
| R6 | RSS1178    | 74.62 | Bra031017 | A09-34.672           | 27 |
| R6 | RS2CL3082s | 74.94 | Bra036406 | A07-4.57             | 27 |
| R6 | RS2CL4493s | 75.18 | Bra002022 | A07-2.489            | 27 |
| R6 | RGB9877c   | 75.31 |           |                      | 27 |
| R6 | RGC9878c   | 75.31 |           |                      | 27 |
| R6 | RGB12172c  | 75.31 | Bra015233 | A07-3.426            | 27 |
| R6 | RS2CL7011s | 75.39 | Bra036409 | A07-4.638            | 27 |

|    |            |        |           |                      |    |
|----|------------|--------|-----------|----------------------|----|
| R6 | OPJ09      | 75.52  |           |                      | 27 |
| R6 | RS2CL2923s | 75.63  | Bra036405 | A07-4.565            | 27 |
| R6 | RSS0489    | 75.81  | Bra031031 | A09-34.604           |    |
| R6 | RS2CL3164s | 75.96  | Bra040613 | Scaffold000223-0.025 |    |
| R6 | RGA1701s   | 76.25  |           |                      |    |
| R6 | RGC17769c  | 76.93  |           |                      |    |
| R6 | RS2CL3911s | 77.46  | Bra012317 | A07-10.795           |    |
| R6 | RSS2949_a  | 77.71  | Bra001995 | A07-2.775            |    |
| R6 | RS2CL5376s | 77.83  | Bra002663 | A10-8.412            |    |
| R6 | RS2CL1217s | 80.65  | Bra012369 | A07-10.374           |    |
| R6 | Rs2CL1765s | 81.47  | Bra038815 | A07-1.162            |    |
| R6 | RSS0406    | 82.2   | Bra026736 | A09-35.203           | 28 |
| R6 | RGC201c    | 84.1   |           |                      | 28 |
| R6 | RGC4639c   | 84.33  |           |                      | 28 |
| R6 | CA51H      | 84.49  |           |                      | 28 |
| R6 | RSS2960    | 84.99  | Bra006933 | A09-27.822           | 28 |
| R6 | RGC9315c   | 85.11  | Bra026869 | A09-35.804           | 28 |
| R6 | RS2CL2201s | 86.23  | Bra026705 | A09-35.058           | 28 |
| R6 | RSS0494    | 86.61  | Bra006917 | A09-27.656           | 29 |
| R6 | RS2CL1536s | 87.18  | Bra026708 | A09-35.074           | 29 |
| R6 | RGC2126c   | 87.73  |           |                      | 29 |
| R6 | RGC8845c   | 89.19  | Bra036817 | A09-27.146           | 29 |
| R6 | RS2CL2405s | 89.66  | Bra036092 | A09-26.735           | 29 |
| R6 | RSS0654    | 91.15  | Bra036813 | A09-27.165           | 29 |
| R6 | RS2CL2415s | 92.15  | Bra017991 | A06-9.027            |    |
| R6 | RGC5299c   | 92.23  |           |                      |    |
| R6 | RSS2335    | 93.11  | Bra021109 | A01-23.112           |    |
| R6 | CC56b      | 95.11  |           |                      |    |
| R6 | RSS0318    | 96.81  | Bra018086 | A06-9.841            | 30 |
| R6 | RSS1066    | 97.31  | Bra018099 | A06-9.951            | 30 |
| R6 | RSS0144    | 97.61  | Bra018141 | A06-10.28            | 30 |
| R6 | RSS1276    | 99.11  | Bra018168 | A06-10.479           | 30 |
| R6 | RS2CL2353s | 99.2   | Bra018190 | A06-10.639           | 30 |
| R6 | RGA2249s   | 102.93 |           |                      | 30 |
| R6 | RSS1104    | 103.07 | Bra019442 | A06-11.788           | 30 |
| R6 | RSS1095    | 103.47 | Bra034972 | Scaffold000100-0.446 |    |
| R6 | RSS3864    | 104.67 | Bra007782 | A09-32.371           | 31 |
| R6 | RSS0660    | 105.17 | Bra010099 | A06-14.397           | 31 |
| R6 | CA92       | 106.57 |           |                      | 31 |
| R6 | RS2CL2669s | 110.66 | Bra034985 | Scaffold000100-0.661 | 31 |
| R6 | RGC3431c   | 110.9  | Bra018128 | A06-10.182           | 31 |
| R6 | RS2CL2529s | 110.93 | Bra019425 | A06-11.556           | 31 |
| R6 | RSS3405    | 112.02 | Bra038518 | A09-33.476           | 31 |
| R6 | RSS1020    | 112.02 | Bra038518 | A09-33.476           | 31 |
| R6 | Rs2CL1769s | 112.07 | Bra007788 | A09-32.393           | 31 |
| R6 | RGC7305c   | 112.65 |           |                      | 31 |



|    |            |        |           |            |    |
|----|------------|--------|-----------|------------|----|
| R6 | RSS3937    | 113.85 | Bra031205 | A09-33.77  | 31 |
| R6 | RS2CL7280s | 114.14 | Bra007846 | A09-32.746 | 31 |
| R6 | OPT12a     | 115.58 |           |            |    |
| R6 | RS2CL7089s | 115.59 | Bra039216 | A09-32.964 | 31 |
| R6 | RGC11789c  | 116.51 |           |            | 31 |
| R6 | CA96       | 116.89 |           |            |    |
| R6 | RS2CL6447s | 118.47 | Bra031143 | A09-34.063 | 31 |
| R6 | RSS3082    | 118.61 | Bra031137 | A09-34.075 | 31 |
| R6 | Rs2CL1480s | 119.54 | Bra031139 | A09-34.069 | 31 |
| R6 | RS2CL1246s | 119.59 | Bra031127 | A09-34.116 | 31 |
| R6 | RGC2386c   | 120.35 | Bra034672 | A08-11.369 | 31 |
| R6 | RGC9240c   | 120.35 |           |            |    |
| R6 | CC65a      | 120.73 |           |            |    |
| R6 | OPT16H     | 122.63 |           |            |    |
| R6 | RS2CL3093s | 123.21 | Bra012077 | A07-12.394 |    |
| R6 | RSS2968    | 124.52 |           |            |    |
| R6 | RS2CL7541s | 124.65 | Bra034318 | A04-12.239 |    |
| R6 | RGC916c    | 126.72 | Bra018273 | A05-7.08   | 32 |
| R6 | RSS2167    | 127.44 | Bra018640 | A06-2.865  | 32 |
| R6 | RGC17489c  | 128.24 | Bra005056 | A05-3.202  | 32 |
| R6 | Rs2CL2106s | 132.7  | Bra018353 | A05-7.715  | 32 |
| R6 | RGC570c    | 132.71 |           |            | 32 |
| R6 | RSS1288    | 133.22 | Bra018368 | A05-7.797  | 32 |
| R6 | RGC14157c  | 133.77 | Bra005645 | A05-6.713  | 32 |
| R6 | RSS2586    | 134.89 | Bra018329 | A05-7.5    | 32 |
| R6 | RSS1469    | 135.6  | Bra005611 | A05-6.527  | 32 |
| R6 | RS2CL7837s | 136.74 | Bra005609 | A05-6.514  | 32 |
| R6 | RSS2868    | 137.34 | Bra005543 | A05-6.132  | 32 |
| R6 | RS2CL1111s | 137.74 | Bra005613 | A05-6.532  | 32 |
| R6 | RSS1670    | 138.04 | Bra018239 | A05-6.883  | 32 |
| R6 | CC61b      | 138.14 |           |            | 32 |
| R6 | RGC1609c   | 138.62 | Bra005613 | A05-6.532  | 32 |
| R6 | RSS1084    | 138.84 | Bra005522 | A05-5.997  | 32 |
| R6 | RSS0942    | 138.84 | Bra005505 | A05-5.861  | 32 |
| R6 | RSS2362    | 139.24 | Bra022931 | A03-7.83   | 32 |
| R6 | RS2CL7123s | 139.45 | Bra005542 | A05-6.124  | 32 |
| R6 | RSS3503    | 139.64 | Bra022981 | A03-8.083  | 32 |
| R6 | RSS0171    | 140.04 | Bra005408 | A05-5.352  | 32 |
| R6 | RGC5431c   | 140.86 |           |            | 32 |
| R6 | RSS1190    | 141.24 | Bra005306 | A05-4.692  | 32 |
| R6 | RSS3372    | 142.54 | Bra023061 | A03-8.469  | 32 |
| R6 | RGC1119c   | 142.83 | Bra005269 | A05-4.425  | 32 |
| R6 | RGC1052c   | 143.71 | Bra005105 | A05-3.444  | 32 |
| R6 | RSS1193    | 143.84 | Bra005191 | A05-3.908  | 32 |
| R6 | RGC15890c  | 143.93 |           |            | 32 |
| R6 | RS2CL1853s | 144.22 | Bra005092 | A05-3.388  | 32 |

|    |            |        |           |            |    |
|----|------------|--------|-----------|------------|----|
| R6 | RGC23650c  | 144.24 | Bra005286 | A05-4.556  | 32 |
| R6 | RGC7461c   | 144.69 |           |            | 32 |
| R6 | RGC4566c   | 145.16 |           |            | 32 |
| R6 | RSS0454    | 145.24 | Bra005060 | A05-3.229  | 32 |
| R6 | RS2CL6557s | 145.65 | Bra005207 | A05-4.011  | 32 |
| R6 | RS2CL2395s | 145.71 | Bra005236 | A05-4.201  | 32 |
| R6 | RS2CL3438s | 146.12 | Bra005168 | A05-3.806  | 32 |
| R6 | RS2CL1346s | 146.24 | Bra005141 | A05-3.685  | 32 |
| R6 | RS2CL8252s | 146.39 | Bra006768 | A03-4.978  | 32 |
| R6 | RSS3153    | 146.44 | Bra004993 | A05-2.856  | 32 |
| R6 | RS2CL6331s | 146.81 | Bra005143 | A05-3.704  | 32 |
| R6 | RS2CL934s  | 147.02 | Bra005159 | A05-3.761  | 32 |
| R6 | RS2CL4132s | 147.49 | Bra005102 | A05-3.433  | 32 |
| R6 | RS2CL4854s | 148.37 | Bra005054 | A05-3.197  | 32 |
| R6 | RGA2337s   | 149.59 |           |            | 32 |
| R6 | RGC10645c  | 150.02 |           |            | 32 |
| R6 | RGC801c    | 150.02 | Bra005006 | A05-2.932  | 32 |
| R6 | RGC4495c   | 150.16 | Bra004987 | A05-2.835  | 32 |
| R6 | RGB18830c  | 150.21 |           |            | 32 |
| R6 | Rs2CL1694s | 150.39 | Bra004998 | A05-2.893  | 32 |
| R6 | RS2CL8102s | 150.96 | Bra004587 | A05-0.907  | 32 |
| R6 | OPR11cH    | 151.04 |           |            | 32 |
| R6 | RGC9387c   | 151.43 |           |            | 32 |
| R6 | RSS2756    | 151.84 | Bra004795 | A05-1.863  | 32 |
| R6 | RSS1754    | 151.84 | Bra004786 | A05-1.822  | 32 |
| R6 | RSS3095    | 151.84 |           |            | 32 |
| R6 | RSS2532    | 151.84 | Bra000321 | A03-10.559 | 32 |
| R6 | RS2CL5874s | 152.34 | Bra004654 | A05-1.253  | 32 |
| R6 | RGC7168c   | 152.49 |           |            | 32 |
| R6 | RSS0166    | 153.24 | Bra004935 | A05-2.562  | 32 |
| R6 | RSS0050    | 153.34 | Bra004930 | A05-2.542  | 32 |
| R6 | RGC5183c   | 153.72 |           |            | 32 |
| R6 | CD57       | 153.84 |           |            | 32 |
| R6 | RGC17231c  | 154.38 | Bra004925 | A05-2.52   | 32 |
| R6 | RSS1221    | 154.54 | Bra004546 | A05-0.743  | 32 |
| R6 | RS2CL6859s | 154.77 | Bra004727 | A05-1.536  | 32 |
| R6 | RGC5676c   | 155.53 |           |            | 32 |
| R6 | RGB14649c  | 157.06 |           |            | 32 |
| R6 | RS2CL7316s | 157.61 | Bra004461 | A05-0.257  | 32 |
| R6 | RS2CL6976s | 157.63 | Bra004481 | A05-0.36   | 32 |
| R6 | RGB19481c  | 158.25 | Bra004415 | A05-0.022  | 32 |
| R6 | RGB8057c   | 158.25 |           |            | 32 |
| R6 | RGC12020c  | 158.47 | Bra021391 | A04-19.116 | 32 |
| R6 | RS2CL8726s | 159.04 | Bra004531 | A05-0.67   | 32 |
| R6 | Rs2CL1849s | 163.38 | Bra033420 | A04-4.387  | 32 |
| R6 | RS2CL755s  | 165.82 | Bra004497 | A05-0.452  | 32 |

|    |            |        |           |            |    |
|----|------------|--------|-----------|------------|----|
| R6 | Rs2CL1647s | 167.73 | Bra004926 | A05-2.522  | 32 |
| R7 | RSS3540    | 0      | Bra028508 | A07-14.473 | 33 |
| R7 | CC98aH     | 9.9    |           |            | 33 |
| R7 | RGB9971c   | 12.43  |           |            | 33 |
| R7 | RS2CL1375s | 14.69  | Bra028434 | A07-13.973 | 33 |
| R7 | CC65b      | 14.9   |           |            | 33 |
| R7 | CB85       | 15.3   |           |            | 33 |
| R7 | RGC12560c  | 15.52  |           |            | 33 |
| R7 | RSS1042    | 16     | Bra028547 | A07-14.692 | 33 |
| R7 | RS2CL4083s | 16.56  | Bra028511 | A07-14.487 | 33 |
| R7 | RS2CL4057s | 17.21  | Bra025495 | A04-8.709  | 33 |
| R7 | RSS3729    | 17.8   |           |            | 33 |
| R7 | RS2CL5433s | 18.08  | Bra028506 | A07-14.454 | 33 |
| R7 | CA30       | 18.3   |           |            | 33 |
| R7 | RS2CL2223s | 18.54  | Bra028519 | A07-14.527 | 33 |
| R7 | RGB16666c  | 19.03  | Bra007084 | A09-28.734 | 33 |
| R7 | RGC19850c  | 19.22  | Bra003138 | A07-14.826 | 33 |
| R7 | RS2CL5628s | 19.36  | Bra003139 | A07-14.828 | 33 |
| R7 | CA32H      | 19.7   |           |            | 33 |
| R7 | RSS2871    | 20.8   | Bra007019 | A09-28.372 | 33 |
| R7 | RS2CL4729s | 21.14  | Bra003220 | A07-15.246 | 33 |
| R7 | RSS0830    | 21.2   | Bra003187 | A07-15.018 | 33 |
| R7 | RSS0953    | 21.2   | Bra003158 | A07-14.897 | 33 |
| R7 | RSS1721    | 21.2   | Bra003181 | A07-15     | 33 |
| R7 | RS2CL1045s | 21.43  | Bra014743 | A04-2.747  | 33 |
| R7 | RS2CL6364s | 21.73  | Bra003239 | A07-15.367 | 33 |
| R7 | RS2CL4386s | 22.6   | Bra003289 | A07-15.689 | 33 |
| R7 | RSS0476    | 23.1   | Bra003300 | A07-15.754 | 33 |
| R7 | RS2CL5785s | 24.13  | Bra003319 | A07-15.86  | 33 |
| R7 | RS2CL1776s | 24.81  | Bra003435 | A07-16.45  | 33 |
| R7 | RS2CL4295s | 24.88  | Bra003397 | A07-16.291 | 33 |
| R7 | CC75       | 24.93  |           |            | 33 |
| R7 | RS2CL3314s | 25.05  | Bra003402 | A07-16.312 | 33 |
| R7 | RGC10321c  | 25.45  |           |            | 33 |
| R7 | CB25b      | 27.39  |           |            | 33 |
| R7 | CB30a      | 27.39  |           |            | 33 |
| R7 | RGC1833c   | 27.47  |           |            | 33 |
| R7 | RGC1402c   | 29.25  |           |            | 33 |
| R7 | RSS0148    | 29.26  | Bra003466 | A07-16.62  | 33 |
| R7 | RS2CL1270s | 30.34  | Bra003527 | A07-16.917 | 33 |
| R7 | RSS0466    | 30.48  | Bra003560 | A07-17.072 | 33 |
| R7 | RSS0449    | 30.58  | Bra003564 | A07-17.088 | 33 |
| R7 | RSS3262    | 30.68  | Bra003541 | A07-16.979 | 33 |
| R7 | RSS3922    | 30.68  | Bra003542 | A07-16.981 | 33 |
| R7 | RSS0313    | 31.28  | Bra007679 | A09-31.883 | 33 |

|    |            |       |           |            |    |
|----|------------|-------|-----------|------------|----|
| R7 | RSS0797    | 31.28 | Bra003502 | A07-16.78  | 33 |
| R7 | RSS3963    | 31.28 | Bra003498 | A07-16.77  | 33 |
| R7 | RSS1371    | 31.98 | Bra003502 | A07-16.78  | 33 |
| R7 | RGB4595c   | 32.21 | Bra003556 | A07-17.047 | 33 |
| R7 | CB38H      | 32.74 |           |            | 33 |
| R7 | RGC7238c   | 33.65 | Bra003645 | A07-17.498 | 33 |
| R7 | RGC7757c   | 33.65 | Bra003687 | A07-17.759 | 33 |
| R7 | Rs2CL1633s | 34.88 | Bra003630 | A07-17.422 | 33 |
| R7 | CD02       | 35.09 |           |            | 33 |
| R7 | RGC5428c   | 36.07 |           |            | 33 |
| R7 | RS2CL2646s | 36.27 | Bra003647 | A07-17.503 | 33 |
| R7 | RS2CL3416s | 37.33 | Bra003692 | A07-17.788 | 33 |
| R7 | RS2CL891s  | 40.94 | Bra003779 | A07-18.304 | 33 |
| R7 | RGC2981c   | 41.38 |           |            | 33 |
| R7 | RS2CL6078s | 42.78 | Bra003804 | A07-18.435 | 33 |
| R7 | OPJ14      | 43.31 |           |            | 33 |
| R7 | RS2CL2164s | 43.56 | Bra003821 | A07-18.495 | 33 |
| R7 | RS2CL4632s | 43.73 | Bra003818 | A07-18.482 | 33 |
| R7 | RGA2312s   | 44.31 | Bra003861 | A07-18.696 | 33 |
| R7 | RGA2511s   | 44.91 | Bra021154 | A01-22.851 | 33 |
| R7 | RGC17698c  | 45.51 |           |            | 33 |
| R7 | RS2CL2115s | 46.17 | Bra003864 | A07-18.718 | 33 |
| R7 | RGC8422c   | 47.25 |           |            | 33 |
| R7 | CC18       | 47.59 |           |            | 33 |
| R7 | Rs2CL2268s | 48.3  | Bra003991 | A07-19.431 | 33 |
| R7 | S          | 48.56 |           |            | 33 |
| R7 | RS2CL5832s | 48.58 | Bra003981 | A07-19.396 | 33 |
| R7 | RS2CL4290s | 49.03 | Bra004036 | A07-19.728 | 33 |
| R7 | RGC1041c   | 49.35 | Bra004020 | A07-19.64  | 33 |
| R7 | RGC1883c   | 49.35 |           |            | 33 |
| R7 | RGC22628c  | 49.35 | Bra004016 | A07-19.613 | 33 |
| R7 | RGC3773c   | 49.35 |           |            | 33 |
| R7 | RS2CL2685s | 49.47 | Bra003928 | A07-19.084 | 33 |
| R7 | CA52H      | 49.99 |           |            | 33 |
| R7 | RGA1801s   | 50.05 |           |            | 33 |
| R7 | RS2CL848s  | 50.34 | Bra004067 | A07-19.927 | 33 |
| R7 | RS2CL7649s | 50.38 | Bra004064 | A07-19.903 | 33 |
| R7 | RGC14901c  | 50.95 |           |            | 33 |
| R7 | RS2CL2344s | 51.05 | Bra004105 | A07-20.151 | 33 |
| R7 | RSS0553    | 51.43 | Bra004125 | A07-20.253 | 33 |
| R7 | RGC8873c   | 51.81 | Bra004128 | A07-20.265 | 33 |
| R7 | RGC9973c   | 51.81 | Bra004100 | A07-20.127 | 33 |
| R7 | RGC26589c  | 52.28 | Bra004085 | A07-20.031 | 33 |
| R7 | RGA200s    | 52.69 | Bra006651 | A03-4.478  | 33 |
| R7 | RSS0291    | 52.99 | Bra004146 | A07-20.348 | 33 |
| R7 | RS2CL6332s | 53.21 | Bra004127 | A07-20.26  | 33 |

|    |            |       |           |                      |    |
|----|------------|-------|-----------|----------------------|----|
| R7 | RGC10939c  | 53.74 |           |                      | 33 |
| R7 | RS2CL1154s | 54.33 | Bra004143 | A07-20.341           | 33 |
| R7 | RGC5695c   | 54.52 |           |                      | 33 |
| R7 | RGC7132c   | 54.73 | Bra004135 | A07-20.309           | 33 |
| R7 | CA95a      | 55.04 |           |                      | 33 |
| R7 | RS2CL7750s | 55.11 | Bra004174 | A07-20.491           | 33 |
| R7 | RS2CL4436s | 55.83 | Bra004175 | A07-20.495           | 33 |
| R7 | RSS1809    | 56.46 |           |                      | 33 |
| R7 | RS2CL1077s | 56.55 | Bra004214 | A07-20.748           | 33 |
| R7 | RGA63s     | 57.03 | Bra004185 | A07-20.568           | 33 |
| R7 | RGC10094c  | 57.07 |           |                      | 33 |
| R7 | RGC1124c   | 57.07 |           |                      | 33 |
| R7 | RGB24589c  | 57.07 |           |                      | 33 |
| R7 | RGB25459c  | 57.07 | Bra004214 | A07-20.748           | 33 |
| R7 | RS2CL6603s | 58.03 | Bra004236 | A07-20.861           | 33 |
| R7 | CC46       | 58.38 |           |                      | 33 |
| R7 | RS2CL2158s | 58.67 | Bra004238 | A07-20.87            | 33 |
| R7 | RGC5019c   | 58.84 |           |                      | 33 |
| R7 | RS2CL3876s | 58.98 | Bra004263 | A07-20.984           | 33 |
| R7 | RSS0893    | 59.49 | Bra040803 | Scaffold000262-0.012 |    |
| R7 | RSS0043    | 59.69 | Bra015711 | A07-24.511           | 34 |
| R7 | RSS1241    | 59.89 | Bra015733 | A07-24.392           | 34 |
| R7 | RSS1896    | 60.29 | Bra015739 | A07-24.364           | 34 |
| R7 | RSS1737    | 60.69 | Bra015779 | A07-24.177           | 34 |
| R7 | RSS3091    | 61.49 | Bra015784 | A07-24.152           | 34 |
| R7 | RSS2593    | 61.59 | Bra015784 | A07-24.152           | 34 |
| R7 | RSS3615    | 62.19 | Bra003748 | A07-18.118           | 34 |
| R7 | RSS1781    | 62.99 | Bra015878 | A07-23.671           | 34 |
| R7 | Ph         | 65.09 |           |                      | 34 |
| R7 | R89998     | 65.59 |           |                      | 34 |
| R7 | RS2CL4343s | 66.48 | Bra008243 | A02-13.043           | 34 |
| R7 | RSS0675    | 66.51 | Bra015797 | A07-24.097           | 34 |
| R7 | RS2CL859s  | 66.54 | Bra015799 | A07-24.092           | 34 |
| R7 | RS2CL6039s | 66.88 | Bra015829 | A07-23.943           | 34 |
| R7 | RS2CL3860s | 67.05 | Bra015835 | A07-23.901           | 34 |
| R7 | Rs2CL1833s | 67.15 | Bra015826 | A07-23.958           | 34 |
| R7 | RSS0577    | 67.36 | Bra015846 | A07-23.829           | 34 |
| R7 | RS2CL7600s | 67.42 | Bra015832 | A07-23.914           | 34 |
| R7 | RS2CL7455s | 67.69 | Bra002474 | A10-9.385            | 35 |
| R7 | RGB645c    | 67.77 | Bra015750 | A07-24.317           | 35 |
| R7 | RGC6547c   | 67.77 |           |                      | 35 |
| R7 | RS2CL762s  | 68.17 | Bra015897 | A07-23.604           | 35 |
| R7 | RSS1752    | 68.17 | Bra002290 | A10-10.527           | 35 |
| R7 | RGA1809s   | 68.47 |           |                      | 35 |
| R7 | RS2CL5281s | 68.86 | Bra002440 | A10-9.627            | 35 |
| R7 | RS2CL7601s | 69.33 | Bra002421 | A10-9.759            | 35 |

|    |            |       |           |            |    |
|----|------------|-------|-----------|------------|----|
| R7 | RSS1395    | 70.08 | Bra002468 | A10-9.413  | 35 |
| R7 | RGC175c    | 70.15 | Bra015894 | A07-23.614 | 35 |
| R7 | RGC3382c   | 70.15 | Bra003807 | A07-18.443 | 35 |
| R7 | RGC4853c   | 70.15 | Bra002412 | A10-9.817  | 35 |
| R7 | RGC6940c   | 70.15 |           |            | 35 |
| R7 | RS2CL5291s | 70.76 | Bra002382 | A10-9.991  | 35 |
| R7 | RS2CL896s  | 71.48 | Bra002352 | A10-10.197 | 35 |
| R7 | RS2CL1576s | 71.8  | Bra002347 | A10-10.219 | 35 |
| R7 | RS2CL8862s | 72.13 | Bra002314 | A10-10.429 | 35 |
| R7 | RS2CL2861s | 72.54 | Bra002333 | A10-10.313 | 35 |
| R7 | RS2CL3030s | 73.07 | Bra002332 | A10-10.327 | 35 |
| R7 | RS2CL6700s | 73.6  | Bra009434 | A10-15.435 | 36 |
| R7 | nga249     | 73.64 |           |            | 36 |
| R7 | RGB2012c   | 74.45 | Bra002347 | A10-10.219 | 36 |
| R7 | RGC21683c  | 74.45 | Bra009189 | A10-14.897 | 36 |
| R7 | RGC2749c   | 74.45 | Bra009151 | A10-15.045 | 36 |
| R7 | RGC4411c   | 74.45 |           |            | 36 |
| R7 | RGC6888c   | 74.45 | Bra002325 | A10-10.368 | 36 |
| R7 | RGC18584c  | 74.93 | Bra002293 | A10-10.512 | 36 |
| R7 | RS2CL6652s | 75.18 | Bra009412 | A10-15.339 | 36 |
| R7 | RS2CL3415s | 75.68 | Bra009116 | A10-15.178 | 36 |
| R7 | RS2CL7185s | 75.95 | Bra009127 | A10-15.131 | 36 |
| R7 | RGC10310c  | 76.37 |           |            | 36 |
| R7 | RS2CL4596s | 76.64 | Bra009152 | A10-15.041 | 36 |
| R7 | RSS3362    | 76.72 | Bra035210 | A09-17.026 | 36 |
| R7 | RS2CL2687s | 77.19 | Bra009244 | A10-14.691 | 36 |
| R7 | RS2CL7134s | 77.57 | Bra009248 | A10-14.655 | 36 |
| R7 | RS2CL2387s | 77.69 | Bra009240 | A10-14.7   | 36 |
| R7 | RS2CL6027s | 77.69 | Bra009243 | A10-14.693 | 36 |
| R7 | RS2CL4568s | 77.82 | Bra009227 | A10-14.753 | 36 |
| R7 | Rs2CL1651s | 78.15 | Bra009265 | A10-14.596 | 36 |
| R7 | CA66       | 78.65 |           |            | 36 |
| R7 | RGC1800c   | 78.93 | Bra009366 | A10-14.12  | 36 |
| R7 | RGC591c    | 79.41 | Bra030964 | A08-1.162  | 36 |
| R7 | RS2CL5950s | 79.93 | Bra009311 | A10-14.365 | 36 |
| R7 | RS2CL3381s | 80.6  | Bra009351 | A10-14.178 | 36 |
| R7 | RS2CL3384s | 81.07 | Bra009366 | A10-14.12  | 36 |
| R7 | Rs2CL1984s | 81.23 | Bra009373 | A10-14.092 | 36 |
| R7 | RSS3640    | 81.25 | Bra009393 | A10-14.029 | 36 |
| R7 | RGC12603c  | 82.14 | Bra009064 | A10-13.902 | 36 |
| R7 | CD87a      | 82.62 |           |            | 36 |
| R7 | RGC2185c   | 82.75 |           |            | 36 |
| R7 | RGC21966c  | 82.75 | Bra009058 | A10-13.88  | 36 |
| R7 | RGC4797c   | 82.75 | Bra009044 | A10-13.808 | 36 |
| R7 | Rs2CL1884s | 82.82 | Bra009063 | A10-13.898 | 36 |
| R7 | RsFLC1s    | 83.04 |           |            | 36 |

|    |            |       |           |            |    |
|----|------------|-------|-----------|------------|----|
| R7 | RGA1861s   | 83.25 | Bra009006 | A10-13.637 | 36 |
| R7 | RGB12060c  | 83.54 |           |            | 36 |
| R7 | Rs2CL2475s | 83.84 | Bra006061 | A03-1.813  | 36 |
| R7 | RGC11618c  | 84.2  | Bra009240 | A10-14.7   | 36 |
| R7 | CC19       | 84.63 |           |            | 36 |
| R7 | RS2CL4523s | 85.11 | Bra008889 | A10-13.11  | 36 |
| R7 | RS2CL6940s | 85.26 | Bra008859 | A10-12.969 | 36 |
| R7 | RS2CL3345s | 85.37 | Bra023394 | A02-2.137  | 36 |
| R7 | RS2CL5802s | 85.95 | Bra008821 | A10-12.789 | 36 |
| R7 | RGC11896c  | 86.53 |           |            | 36 |
| R7 | RGB7818c   | 86.53 | Bra008957 | A10-13.422 | 36 |
| R7 | RGC12721c  | 87.71 |           |            | 36 |
| R7 | RGC12875c  | 87.71 |           |            | 36 |
| R7 | RGC15411c  | 87.71 |           |            | 36 |
| R7 | RGC1662c   | 87.71 | Bra008774 | A10-12.6   | 36 |
| R7 | RGC680c    | 87.71 | Bra008750 | A10-12.5   | 36 |
| R7 | RGC8830c   | 87.71 | Bra008841 | A10-12.867 | 36 |
| R7 | RGC9306c   | 87.71 | Bra008820 | A10-12.785 | 36 |
| R7 | RS2CL1610s | 87.74 | Bra008750 | A10-12.5   | 36 |
| R7 | RSS1194    | 88.57 | Bra008701 | A10-12.263 | 36 |
| R7 | SWG7B3     | 89.07 |           |            | 36 |
| R7 | RS2CL7086s | 89.22 | Bra006242 | A03-2.661  | 36 |
| R7 | RGB19113c  | 89.63 | Bra015781 | A07-24.169 | 36 |
| R7 | RGC1995c   | 90.67 | Bra002154 | A10-11.27  | 36 |
| R7 | RGB7653c   | 90.67 | Bra008624 | A10-11.934 | 36 |
| R7 | RGC235c    | 90.7  |           |            | 36 |
| R7 | RGC4058c   | 90.7  | Bra008609 | A10-11.858 | 36 |
| R7 | RGC4381c   | 90.7  | Bra008599 | A10-11.796 | 36 |
| R7 | CB74       | 90.8  |           |            | 36 |
| R7 | Rs2CL2240s | 91.06 | Bra008564 | A10-11.643 | 36 |
| R7 | RS2CL2738s | 91.23 | Bra002133 | A10-11.386 | 36 |
| R7 | RSS0403    | 92.25 | Bra008600 | A10-11.804 | 36 |
| R7 | RS2CL5276s | 92.65 | Bra008581 | A10-11.718 | 36 |
| R7 | RSS0011    | 92.65 | Bra008592 | A10-11.763 | 36 |
| R7 | RS2CL1994s | 93.06 | Bra006490 | A03-3.764  | 36 |
| R7 | RS2CL4131s | 93.24 | Bra002198 | A10-11.015 | 36 |
| R7 | RS2CL7414s | 93.6  | Bra006500 | A03-3.804  | 36 |
| R7 | RSS2945    | 93.75 | Bra002141 | A10-11.359 | 36 |
| R7 | Rs2CL2199s | 93.75 | Bra020059 | A02-3.832  | 36 |
| R7 | RSS1012    | 93.85 | Bra002179 | A10-11.13  | 36 |
| R7 | RGC5308c   | 93.93 | Bra009447 | A10-15.491 | 36 |
| R7 | Rs2CL2272s | 94.18 | Bra002255 | A10-10.706 | 36 |
| R7 | RGB4201c   | 94.61 | Bra009571 | A10-16.072 | 36 |
| R7 | RS2CL2679s | 94.78 | Bra005806 | A03-0.73   | 36 |
| R7 | RSS2692    | 96.05 | Bra002223 | A10-10.855 | 36 |
| R7 | RGC3153c   | 96.24 | Bra002170 | A10-11.174 | 36 |

|    |            |        |           |            |    |
|----|------------|--------|-----------|------------|----|
| R7 | RSS1758    | 96.45  | Bra002241 | A10-10.779 | 36 |
| R7 | RSS2706    | 96.55  | Bra020038 | A02-3.721  | 36 |
| R7 | RSS2731    | 96.55  | Bra018298 | A05-7.282  | 36 |
| R7 | RSS1273    | 96.75  | Bra002237 | A10-10.799 | 36 |
| R7 | RSS3991    | 97.05  | Bra009474 | A10-15.652 | 37 |
| R7 | RS2CL3584s | 97.21  | Bra009607 | A10-16.233 | 37 |
| R7 | RS2CL1749s | 98.06  |           |            | 37 |
| R7 | RSS1786    | 98.25  | Bra009629 | A10-16.317 | 37 |
| R7 | RSS0080    | 98.35  | Bra028854 | A02-0.352  | 37 |
| R7 | RSS1147    | 98.35  | Bra009568 | A10-16.06  | 37 |
| R7 | RSS1574    | 98.35  | Bra009554 | A10-16.019 | 37 |
| R7 | RSS3973    | 98.35  | Bra009586 | A10-16.136 | 37 |
| R7 | RSS2914_a  | 98.75  | Bra009533 | A10-15.929 | 37 |
| R7 | RSS0239    | 99.05  | Bra009491 | A10-15.709 | 37 |
| R7 | CB30b      | 99.65  |           |            |    |
| R7 | CC61a      | 100.45 |           |            |    |
| R7 | RGC11328c  | 100.46 |           |            |    |
| R7 | RGC8546c   | 103.63 | Bra013962 | A08-4.951  |    |
| R7 | RGC17372c  | 105.7  | Bra013977 | A08-4.906  |    |
| R7 | RSS1523    | 109.85 | Bra008918 | A10-13.208 |    |
| R8 | RGC12178c  | 0      | Bra014304 | A08-1.819  | 38 |
| R8 | RGB6149c   | 1.5    |           |            | 38 |
| R8 | RS2CL1123s | 1.72   | Bra014320 | A08-1.669  | 38 |
| R8 | RGC147c    | 2.44   |           |            | 38 |
| R8 | RSS3445    | 3.54   | Bra014278 | A08-2.019  | 38 |
| R8 | Rs2CL2236s | 4.21   | Bra018920 | A06-1.267  | 38 |
| R8 | RGC14381c  | 4.67   |           |            | 38 |
| R8 | RS2CL5518s | 4.94   | Bra030877 | A08-0.464  | 38 |
| R8 | RS2CL2580s | 5.35   | Bra030905 | A08-0.688  | 38 |
| R8 | RGC6104c   | 5.67   |           |            |    |
| R8 | RSS2533_a  | 7.42   | Bra025124 | A06-22.26  | 39 |
| R8 | RGA1690s   | 7.53   |           |            | 39 |
| R8 | RSS0760    | 7.88   | Bra025167 | A06-21.924 | 39 |
| R8 | RS2CL5440s | 8.21   | Bra014243 | A08-2.248  | 39 |
| R8 | OPE20a     | 10.61  |           |            | 39 |
| R8 | RSS2626    | 10.91  | Bra024817 | A06-22.54  | 39 |
| R8 | RSS0805    | 11.71  | Bra024828 | A06-22.593 | 39 |
| R8 | RSS1427    | 11.71  | Bra024832 | A06-22.616 | 39 |
| R8 | RSS0092    | 13.91  | Bra024863 | A06-22.87  | 39 |
| R8 | RSS2684    | 14.31  |           |            | 39 |
| R8 | RSS2703    | 14.51  | Bra014192 | A08-2.682  | 39 |
| R8 | RSS1899    | 15.21  | Bra024910 | A06-23.154 | 39 |
| R8 | CA87bH     | 15.31  |           |            | 39 |
| R8 | RSS3003    | 15.81  | Bra024899 | A06-23.108 | 39 |
| R8 | R30624a    | 16.01  |           |            |    |



|    |            |       |           |            |    |
|----|------------|-------|-----------|------------|----|
| R8 | R30025     | 16.31 |           |            |    |
| R8 | BRMS033    | 16.51 |           |            |    |
| R8 | RSS2613    | 17.01 | Bra030889 | A08-0.573  | 40 |
| R8 | RSS1208    | 17.11 | Bra030893 | A08-0.604  | 40 |
| R8 | RSS3870    | 17.21 | Bra024967 | A06-23.384 | 40 |
| R8 | RSS0974    | 17.41 | Bra014278 | A08-2.019  | 40 |
| R8 | RSS2196    | 17.41 | Bra014292 | A08-1.885  | 40 |
| R8 | RSS0042    | 17.51 | Bra014295 | A08-1.865  | 40 |
| R8 | RS2CL3262s | 19.21 | Bra014097 | A08-3.551  | 40 |
| R8 | RGC629c    | 20.26 | Bra035538 | A08-8.363  | 40 |
| R8 | CA77       | 20.76 |           |            | 40 |
| R8 | RGA2253s   | 21.22 |           |            | 40 |
| R8 | CD04       | 21.41 |           |            | 40 |
| R8 | RGC8651c   | 21.79 |           |            | 40 |
| R8 | RS2CL5213s | 21.81 | Bra014080 | A08-3.739  | 40 |
| R8 | RGC2369c   | 22.71 | Bra036751 | A08-7.355  | 40 |
| R8 | RS2CL2117s | 23.07 | Bra034897 | A08-5.551  | 40 |
| R8 | RGC3380c   | 23.17 | Bra034880 | A08-5.762  | 40 |
| R8 | RS2CL809s  | 23.49 | Bra034873 | A08-5.881  | 40 |
| R8 | RGC10544c  | 23.95 |           |            | 40 |
| R8 | RGC10825c  | 23.95 |           |            | 40 |
| R8 | RGC1319c   | 23.95 |           |            | 40 |
| R8 | RGB16366c  | 23.95 |           |            | 40 |
| R8 | RGC2994c   | 23.95 | Bra014016 | A08-4.555  | 40 |
| R8 | RGC8228c   | 23.95 |           |            | 40 |
| R8 | RS2CL4855s | 24.03 | Bra036771 | A08-7.139  | 40 |
| R8 | RS2CL1406s | 24.21 | Bra036763 | A08-7.233  | 40 |
| R8 | RS2CL3940s | 24.73 |           |            | 40 |
| R8 | RS2CL2104s | 24.88 | Bra012397 | A07-10.224 | 40 |
| R8 | RS2CL3538s | 25.82 | Bra038939 | A08-8.444  | 40 |
| R8 | RS2CL5211s | 26.82 | Bra038952 | A08-8.541  | 40 |
| R8 | RGC20183c  | 27.25 |           |            | 40 |
| R8 | CA91       | 28.52 |           |            | 40 |
| R8 | RS2CL3875s | 28.66 | Bra038439 | A08-8.787  | 40 |
| R8 | RS2CL3155s | 29.12 | Bra038418 | A08-8.978  | 40 |
| R8 | Rs2CL1806s | 29.56 | Bra008122 | A02-12.257 | 40 |
| R8 | RGC12354c  | 29.8  |           |            | 40 |
| R8 | RGC5581c   | 29.8  |           |            | 40 |
| R8 | RSS0790    | 29.82 | Bra039880 | A08-6.121  | 40 |
| R8 | RGC12097c  | 30.29 | Bra038949 | A08-8.525  | 40 |
| R8 | RGC274c    | 31.31 |           |            | 40 |
| R8 | RS2CL5594s | 31.39 | Bra038093 | A08-6.624  | 40 |
| R8 | RGC20497c  | 31.5  |           |            | 40 |
| R8 | RGC5712c   | 31.5  |           |            | 40 |
| R8 | RGC7156c   | 31.5  |           |            | 40 |
| R8 | RGC484c    | 32    |           |            | 40 |

|    |            |       |           |                      |    |
|----|------------|-------|-----------|----------------------|----|
| R8 | RGC2683c   | 32.63 |           |                      | 40 |
| R8 | RS2CL5411s | 32.94 | Bra021506 | A01-24.07            | 40 |
| R8 | RS2CL4559s | 33.61 | Bra021852 | A04-14.973           | 40 |
| R8 | RS2CL5083s | 33.61 | Bra021067 | A08-9.273            | 40 |
| R8 | CA57H      | 33.7  |           |                      | 40 |
| R8 | RSS0053    | 34.1  | Bra040572 | Scaffold000219-0.025 | 40 |
| R8 | RS2CL5831s | 34.39 | Bra019179 | A03-25.875           | 40 |
| R8 | RSS1433    | 36.43 | Bra040111 | A01-10.373           | 40 |
| R8 | RSS4002    | 36.43 | Bra026237 | A01-10.267           | 40 |
| R8 | RGC4518c   | 36.63 |           |                      | 40 |
| R8 | RS2CL1252s | 37.79 | Bra013262 | A01-4.604            | 40 |
| R8 | CB75H      | 38.06 |           |                      | 40 |
| R8 | CC88bH     | 39.96 |           |                      | 40 |
| R8 | RGC14573c  | 40.23 | Bra020935 | A08-10.307           | 40 |
| R8 | RSS0294    | 41.44 | Bra020933 | A08-10.32            | 40 |
| R8 | RGC173c    | 41.86 | Bra034664 | A08-11.419           | 40 |
| R8 | RGC2807c   | 41.86 |           |                      | 40 |
| R8 | CC72       | 42.41 |           |                      | 40 |
| R8 | RS2CL1403s | 44.41 | Bra010681 | A08-15.172           | 40 |
| R8 | RSS0615    | 44.92 | Bra010222 | A08-12.496           | 40 |
| R8 | RSS1330    | 45.72 | Bra034675 | A08-11.343           | 40 |
| R8 | RSS1747    | 46.62 |           |                      | 40 |
| R8 | RS2CL6221s | 47.94 | Bra034595 | A08-11.822           | 40 |
| R8 | T75662     | 48.28 |           |                      | 40 |
| R8 | RSS1844    | 48.88 | Bra024567 | A09-25.573           | 40 |
| R8 | RS2CL1646s | 49.21 | Bra040090 | A08-12.246           | 40 |
| R8 | RSS1680    | 49.37 | Bra034616 | A08-11.727           | 40 |
| R8 | RS2CL2780s | 50.36 | Bra040079 | A08-12.296           | 40 |
| R8 | Rs2CL2111s | 50.69 | Bra040068 | A08-12.411           | 40 |
| R8 | RSS3270    | 51.11 | Bra010246 | A08-12.624           | 40 |
| R8 | RGC9390c   | 51.14 |           |                      | 40 |
| R8 | RGC10000c  | 51.69 | Bra010327 | A08-13.113           | 40 |
| R8 | RGC5417c   | 51.69 | Bra023955 | A03-28.649           | 40 |
| R8 | RSS2735    | 51.76 | Bra040087 | A08-12.256           | 40 |
| R8 | CA88N      | 52.46 |           |                      | 40 |
| R8 | RS2CL4240s | 52.61 | Bra010229 | A08-12.525           | 40 |
| R8 | RS2CL5626s | 53.34 | Bra010245 | A08-12.621           | 40 |
| R8 | CC15H      | 53.49 |           |                      | 40 |
| R8 | RS2CL5288s | 54.18 | Bra010248 | A08-12.628           | 40 |
| R8 | RGC2076c   | 55.59 | Bra010546 | A08-14.305           | 40 |
| R8 | RSS0305    | 56.55 | Bra026273 | A01-10.047           | 40 |
| R8 | RSS1175    | 56.55 |           |                      | 40 |
| R8 | RGC11890c  | 56.96 |           |                      | 40 |
| R8 | RGC14479c  | 58.07 |           |                      | 40 |
| R8 | ACGM23     | 58.99 |           |                      | 40 |
| R8 | RS2CL1940s | 59.21 | Bra011642 | A01-1.296            | 40 |

|    |            |       |           |            |    |
|----|------------|-------|-----------|------------|----|
| R8 | CC13       | 60.13 |           |            | 40 |
| R8 | Rs2CL1970s | 60.24 | Bra010818 | A08-15.843 | 40 |
| R8 | RGC16204c  | 60.99 | Bra010628 | A08-14.9   | 40 |
| R8 | RSS2248    | 61.37 | Bra010548 | A08-14.319 | 40 |
| R8 | RS2CL3284s | 61.75 | Bra010554 | A08-14.371 | 40 |
| R8 | RGC3490c   | 62.11 |           |            | 40 |
| R8 | RS2CL1179s | 62.29 | Bra010574 | A08-14.491 | 40 |
| R8 | RS2CL4152s | 62.99 | Bra010600 | A08-14.671 | 40 |
| R8 | RSS0073    | 63    | Bra010632 | A08-14.92  | 40 |
| R8 | RGC8307c   | 63.9  |           |            | 40 |
| R8 | RSS3326    | 64.45 |           |            | 40 |
| R8 | Rs2CL1468s | 64.49 | Bra010982 | A08-16.622 | 40 |
| R8 | RGC8839c   | 65.26 |           |            | 40 |
| R8 | RGC258c    | 65.62 | Bra010759 | A08-15.506 | 40 |
| R8 | RGC14352c  | 65.76 | Bra010775 | A08-15.579 | 40 |
| R8 | RGC6994c   | 65.76 | Bra010745 | A08-15.448 | 40 |
| R8 | RS2CL881s  | 66.05 | Bra010719 | A08-15.331 | 40 |
| R8 | RGC2153c   | 66.26 |           |            | 40 |
| R8 | RS2CL1475s | 66.86 | Bra010706 | A08-15.287 | 40 |
| R8 | RGC26764c  | 67.25 | Bra010867 | A08-16.068 | 40 |
| R8 | RSS3178    | 67.32 | Bra010811 | A08-15.793 | 40 |
| R8 | RSS3174    | 67.72 | Bra010829 | A08-15.894 | 40 |
| R8 | RGC19563c  | 68.79 |           |            | 40 |
| R8 | RSS0382    | 69.5  | Bra010851 | A08-16.007 | 40 |
| R8 | RSS3738    | 69.5  | Bra010848 | A08-16     | 40 |
| R8 | RGC2170c   | 69.95 |           |            | 40 |
| R8 | RGC18537c  | 70.29 |           |            | 40 |
| R8 | RSS0919    | 71.15 | Bra010979 | A08-16.608 | 40 |
| R8 | RS2CL1250s | 71.23 | Bra010899 | A08-16.232 | 40 |
| R8 | RGC15683c  | 71.86 |           |            | 40 |
| R8 | RSS2610    | 72.12 | Bra010936 | A08-16.428 | 40 |
| R8 | RS2CL5401s | 72.43 | Bra010950 | A08-16.464 | 40 |
| R8 | RS2CL7655s | 72.61 | Bra010940 | A08-16.437 | 40 |
| R8 | RSS2489    | 72.61 | Bra010956 | A08-16.49  | 40 |
| R8 | RGC1653c   | 73.01 | Bra016271 | A08-16.862 | 40 |
| R8 | RGC17676c  | 73.01 |           |            | 40 |
| R8 | RGB14459c  | 73.15 | Bra010976 | A08-16.58  | 40 |
| R8 | OPR20      | 73.34 |           |            | 40 |
| R8 | Rs2CL1478s | 73.69 | Bra010996 | A08-16.718 | 40 |
| R8 | RGB11843c  | 73.9  | Bra016376 | A08-17.353 | 40 |
| R8 | RSS1585    | 74.03 | Bra011009 | A08-16.794 | 40 |
| R8 | RGC8853c   | 74.38 |           |            | 40 |
| R8 | RS2CL3498s | 74.55 | Bra016293 | A08-16.962 | 40 |
| R8 | RS2CL5877s | 75.73 | Bra016372 | A08-17.334 | 40 |
| R8 | RSS1295    | 75.84 | Bra011002 | A08-16.754 | 40 |
| R8 | Rs2CL1741s | 76.98 | Bra016436 | A08-17.688 | 40 |

|    |            |       |           |            |    |
|----|------------|-------|-----------|------------|----|
| R8 | RS2CL3268s | 77.62 | Bra016401 | A08-17.511 | 40 |
| R8 | RSS0229    | 78.36 | Bra025871 | A06-8.324  | 40 |
| R8 | RS2CL5368s | 78.58 | Bra016448 | A08-17.752 | 40 |
| R8 | RSS0066    | 78.94 | Bra037224 | A09-5.526  | 40 |
| R8 | RS2CL2922s | 79.04 | Bra016490 | A08-17.924 | 40 |
| R8 | RS2CL3626s | 79.45 | Bra016457 | A08-17.794 | 40 |
| R8 | RSS2460    | 79.51 | Bra016574 | A08-18.347 | 40 |
| R8 | RSS2434    | 79.81 | Bra025940 | A06-6.575  | 40 |
| R8 | RSS2901    | 80.01 | Bra016586 | A08-18.393 | 40 |
| R8 | RS2CL4706s | 80.14 | Bra016502 | A08-18.009 | 40 |
| R8 | RSS3034    | 80.67 | Bra016604 | A08-18.483 | 40 |
| R8 | RS2CL5634s | 80.88 | Bra016521 | A08-18.09  | 40 |
| R8 | RSS0327    | 80.95 | Bra016607 | A08-18.494 | 40 |
| R8 | RSS3614    | 81.25 | Bra016593 | A08-18.427 | 40 |
| R8 | RS2CL1509s | 82.09 | Bra016749 | A08-19.031 | 40 |
| R8 | RSS2378    | 82.3  | Bra016653 | A08-18.661 | 40 |
| R8 | RGC11743c  | 82.42 |           |            | 40 |
| R8 | RSS3078    | 82.59 | Bra026205 | A06-5.288  | 40 |
| R8 | RS2CL1319s | 82.66 | Bra016653 | A08-18.661 | 40 |
| R8 | RS2CL5849s | 82.67 | Bra016644 | A08-18.632 | 40 |
| R8 | RS2CL5318s | 82.87 | Bra015597 | A10-0.275  | 40 |
| R8 | Rs2CL2338s | 82.96 | Bra016664 | A08-18.706 | 40 |
| R8 | RS2CL3001s | 83.11 | Bra016739 | A08-18.987 | 40 |
| R8 | RS2CL7379s | 83.72 |           |            | 40 |
| R8 | RGC5306c   | 83.97 | Bra016640 | A08-18.615 | 40 |
| R8 | RGC8280c   | 83.97 |           |            | 40 |
| R8 | RGB8542c   | 83.97 | Bra016836 | A08-19.432 | 40 |
| R8 | RGB8994c   | 83.97 | Bra016609 | A08-18.501 | 40 |
| R8 | RS2CL7544s | 84.27 | Bra030780 | A08-19.622 | 40 |
| R8 | RSS2157    | 84.62 | Bra016755 | A08-19.047 | 40 |
| R8 | RS2CL1601s | 84.74 | Bra016848 | A08-19.501 | 40 |
| R8 | RSS3273    | 84.81 | Bra016750 | A08-19.034 | 40 |
| R8 | RS2CL7685s | 85.42 | Bra031639 | A09-37.196 | 40 |
| R8 | RS2CL2573s | 85.44 | Bra030756 | A08-19.707 | 40 |
| R8 | RS2CL1983s | 85.58 | Bra030799 | A08-19.559 | 40 |
| R8 | RS2CL5298s | 85.75 | Bra030718 | A08-19.899 | 40 |
| R8 | RS2CL5635s | 85.91 | Bra016570 | A08-18.33  | 40 |
| R8 | RGB3215c   | 86.15 | Bra018437 | A05-8.218  | 40 |
| R8 | RSS0027    | 86.26 | Bra030729 | A08-19.845 | 40 |
| R8 | RS2CL2296s | 86.45 | Bra030790 | A08-19.587 | 40 |
| R8 | RS2CL3554s | 86.87 | Bra018629 | A06-2.91   | 40 |
| R8 | RSS1843    | 87.06 | Bra018414 | A05-8.108  | 40 |
| R8 | RS2CL4310s | 87.42 | Bra030705 | A08-19.959 | 40 |
| R8 | RGC10842c  | 87.68 | Bra030801 | A08-19.552 | 40 |
| R8 | RGC13395c  | 87.68 | Bra030709 | A08-19.934 | 40 |
| R8 | RGC3413c   | 87.68 | Bra030742 | A08-19.775 | 40 |

|    |            |        |           |            |    |
|----|------------|--------|-----------|------------|----|
| R8 | RGB3288c   | 87.87  |           |            | 40 |
| R8 | RGC989c    | 87.87  | Bra030784 | A08-19.608 | 40 |
| R8 | RSS2286    | 88.06  | Bra030584 | A08-20.441 | 40 |
| R8 | RS2CL3341s | 88.21  | Bra030599 | A08-20.389 | 40 |
| R8 | RS2CL6784s | 88.37  | Bra015302 | A10-2.107  | 40 |
| R8 | RGC4722c   | 88.59  | Bra030560 | A08-20.545 | 40 |
| R8 | RGC9339c   | 88.59  | Bra030517 | A08-20.722 | 40 |
| R8 | CC50       | 89.36  |           |            | 40 |
| R8 | RGC13159c  | 89.51  | Bra018418 | A05-8.121  | 40 |
| R8 | RS2CL2944s | 90.15  | Bra016834 | A08-19.429 | 40 |
| R8 | Z17993     | 90.36  |           |            | 40 |
| R8 | CB80       | 91.26  |           |            | 40 |
| R8 | RGB3124c   | 92.24  | Bra030183 | A07-8.107  | 40 |
| R8 | RGC7108c   | 92.24  | Bra011858 | A01-0.21   | 40 |
| R8 | CB80N      | 93.36  |           |            | 40 |
| R8 | CA22bH     | 100.66 |           |            | 40 |
| R8 | RSS3836    | 101.36 | Bra016534 | A08-18.138 | 40 |
| R9 | PK9        | 0      |           |            |    |
| R9 | CA88       | 5.8    |           |            |    |
| R9 | RSS1006_a  | 8.5    | Bra019484 | A06-12.444 |    |
| R9 | RSS0129    | 11     | Bra035194 | A07-25.819 | 41 |
| R9 | RSS2168    | 12.3   | Bra035159 | A07-25.695 | 41 |
| R9 | RSS2147    | 12.5   | Bra012094 | A07-12.281 | 41 |
| R9 | RGA1576s   | 12.9   |           |            | 41 |
| R9 | RSS4036    | 13.5   | Bra035052 | A07-25.255 | 41 |
| R9 | RS2CL7699s | 14.59  | Bra035095 | A07-25.426 | 41 |
| R9 | RGA1547s   | 15.36  |           |            | 41 |
| R9 | RS2CL3487s | 16.04  | Bra035048 | A07-25.232 | 41 |
| R9 | RSS2321    | 17.62  |           |            | 41 |
| R9 | RSS1369    | 18.26  | Bra004367 | A07-21.549 | 42 |
| R9 | RS2CL1156s | 18.9   | Bra004320 | A07-21.257 | 42 |
| R9 | RS2CL1885s | 19.14  | Bra035407 | A01-16.476 | 42 |
| R9 | RSS1177    | 19.52  | Bra004402 | A07-21.747 | 42 |
| R9 | RGC15483c  | 20.02  |           |            | 42 |
| R9 | RGB21440c  | 20.02  | Bra015640 | A07-24.885 | 42 |
| R9 | RGC22512c  | 20.02  | Bra026703 | A09-35.045 | 42 |
| R9 | RGC4199c   | 20.02  |           |            | 42 |
| R9 | RGC4665c   | 20.02  | Bra003612 | A07-17.345 | 42 |
| R9 | RS2CL1281s | 20.2   | Bra004397 | A07-21.72  | 42 |
| R9 | RS2CL2288s | 21.02  | Bra006371 | A03-3.222  | 42 |
| R9 | RSS3821    | 21.87  | Bra016190 | A07-22.261 | 42 |
| R9 | RS2CL808s  | 21.94  | Bra016264 | A07-21.845 | 42 |
| R9 | RGC24745c  | 22.32  |           |            | 42 |
| R9 | RGC4695c   | 22.32  | Bra004294 | A07-21.098 | 42 |
| R9 | RGC4895c   | 22.32  | Bra004301 | A07-21.133 | 42 |

|    |            |       |           |            |    |
|----|------------|-------|-----------|------------|----|
| R9 | RS2CL4579s | 22.68 | Bra016263 | A07-21.848 | 42 |
| R9 | CF12       | 22.82 |           |            | 42 |
| R9 | CA24N      | 22.92 |           |            | 42 |
| R9 | RS2CL4567s | 23.1  | Bra016255 | A07-21.911 | 42 |
| R9 | RS2CL5197s | 23.69 | Bra016216 | A07-22.115 | 42 |
| R9 | RS2CL4906s | 23.91 | Bra016216 | A07-22.115 | 42 |
| R9 | RS2CL1327s | 24.22 | Bra016195 | A07-22.219 | 42 |
| R9 | RGC10838c  | 24.23 |           |            | 42 |
| R9 | RGC11312c  | 24.23 | Bra016213 | A07-22.127 | 42 |
| R9 | RGC19152c  | 24.23 |           |            | 42 |
| R9 | RGC19895c  | 24.23 | Bra016114 | A07-22.622 | 42 |
| R9 | RGC4679c   | 24.23 | Bra016237 | A07-21.983 | 42 |
| R9 | RGC8563c   | 24.23 |           |            | 42 |
| R9 | RS2CL3830s | 24.61 | Bra016187 | A07-22.277 | 42 |
| R9 | RSS1513    | 26.01 | Bra016092 | A07-22.746 | 42 |
| R9 | RS2CL3460s | 26.12 |           |            | 42 |
| R9 | RSS3835    | 27.27 | Bra016093 | A07-22.742 | 42 |
| R9 | CC56aN     | 27.57 |           |            | 42 |
| R9 | RGA1745s   | 27.66 |           |            | 42 |
| R9 | CA34c      | 28.07 |           |            | 42 |
| R9 | RSS0475    | 29.07 | Bra015994 | A07-23.188 | 42 |
| R9 | RS2CL2301s | 29.21 | Bra015953 | A07-23.362 | 42 |
| R9 | RGC6745c   | 29.99 | Bra002566 | A10-8.912  | 43 |
| R9 | RSS1532    | 30.9  | Bra020332 | A02-5.227  | 43 |
| R9 | RS2CL8479s | 31.66 | Bra002509 | A10-9.218  | 43 |
| R9 | RSS0225    | 32.18 | Bra002518 | A10-9.139  | 43 |
| R9 | RGA1941s   | 32.47 | Bra002561 | A10-8.934  | 43 |
| R9 | RGC7717c   | 32.9  | Bra002596 | A10-8.722  | 43 |
| R9 | RS2CL3316s | 33.32 | Bra002616 | A10-8.607  | 43 |
| R9 | Rs2CL1549s | 34.13 | Bra002568 | A10-8.897  | 43 |
| R9 | RSS3830    | 34.16 | Bra002528 | A10-9.112  | 43 |
| R9 | OPR11bH    | 35.26 |           |            | 43 |
| R9 | RSS1337    | 35.76 | Bra002582 | A10-8.828  | 43 |
| R9 | RSS1870    | 36.56 | Bra002622 | A10-8.579  | 43 |
| R9 | RS2CL1098s | 36.65 | Bra002684 | A10-8.319  | 43 |
| R9 | RS2CL3458s | 36.88 | Bra002673 | A10-8.368  | 43 |
| R9 | RGC683c    | 37.96 |           |            | 43 |
| R9 | RSS1790    | 39.11 | Bra002749 | A10-7.939  | 43 |
| R9 | CA73       | 39.31 |           |            | 43 |
| R9 | RGB7901c   | 40.43 | Bra002861 | A10-7.141  | 43 |
| R9 | RS2CL4013s | 41.08 | Bra002841 | A10-7.264  | 43 |
| R9 | OPR11aH    | 46.84 |           |            | 43 |
| R9 | RSS2112    | 47.14 | Bra002924 | A10-6.781  | 43 |
| R9 | RS2CL1950s | 47.68 | Bra002904 | A10-6.922  | 43 |
| R9 | RSS0897    | 48.06 |           |            | 43 |
| R9 | RS2CL6276s | 48.47 | Bra002897 | A10-6.955  | 43 |

|    |            |       |           |                      |    |
|----|------------|-------|-----------|----------------------|----|
| R9 | RS2CL1162s | 48.59 | Bra002928 | A10-6.752            | 43 |
| R9 | RSS1696_a  | 48.78 | Bra038099 | A05-10.647           | 43 |
| R9 | RGC20593c  | 49.53 |           |                      | 43 |
| R9 | RSS1592    | 50.09 | Bra003055 | A10-5.7              | 43 |
| R9 | RSS0706    | 50.49 | Bra003069 | A10-5.533            | 43 |
| R9 | RSS2916    | 50.69 | Bra003086 | A10-5.364            | 43 |
| R9 | RS2CL5504s | 51.19 | Bra002995 | A10-6.254            | 43 |
| R9 | RGC2630c   | 51.3  |           |                      | 43 |
| R9 | RSS1660    | 51.61 |           |                      | 43 |
| R9 | RGA178s    | 52.61 |           |                      | 43 |
| R9 | RGC6878c   | 53.04 |           |                      | 43 |
| R9 | RGC607c    | 53.57 | Bra003090 | A10-5.334            | 43 |
| R9 | RS2CL5261s | 53.82 |           |                      | 43 |
| R9 | CA53aH     | 54.57 |           |                      | 43 |
| R9 | RS2CL6424s | 54.76 | Bra003079 | A10-5.439            | 43 |
| R9 | RS2CL7401s | 55.84 | Bra028269 | A10-4.473            | 43 |
| R9 | RSS2661    | 56.33 | Bra028279 | A10-4.591            | 43 |
| R9 | RSS3495    | 59.43 | Bra028862 | A02-0.325            | 43 |
| R9 | RS2CL1353s | 60.82 | Bra028288 | A10-4.673            | 43 |
| R9 | RSS2934    | 62.05 | Bra040885 | Scaffold000295-0.022 |    |
| R9 | RGB15272c  | 62.2  |           |                      |    |
| R9 | RSS0404    | 63.19 | Bra040885 | Scaffold000295-0.022 |    |
| R9 | RS2CL1092s | 63.52 | Bra037892 | A09-15.831           | 44 |
| R9 | RS2CL3798s | 63.86 | Bra039774 | A01-8.912            | 44 |
| R9 | RGB2773c   | 63.88 |           |                      | 44 |
| R9 | RGC7838c   | 63.88 | Bra037920 | A09-16.149           | 44 |
| R9 | RS2CL4941s | 63.97 | Bra037951 | A10-3.593            | 44 |
| R9 | CC62H      | 65.01 |           |                      | 44 |
| R9 | Rs2CL2460s | 65.4  | Bra035259 | A09-16.53            | 44 |
| R9 | RS2CL3791s | 66.13 | Bra035247 | A09-16.619           | 44 |
| R9 | RS2CL1061s | 66.44 | Bra025359 | A06-20.931           | 44 |
| R9 | RGC3132c   | 66.69 | Bra035237 | A09-16.753           | 44 |
| R9 | CC37aH     | 66.77 |           |                      | 44 |
| R9 | RS2CL1946s | 67.44 | Bra035213 | A09-17.001           | 44 |
| R9 | RS2CL3879s | 67.92 | Bra014871 | A07-7.949            |    |
| R9 | CC11H      | 68.69 |           |                      |    |
| R9 | RGC7876c   | 68.84 |           |                      |    |
| R9 | RGC17699c  | 69.55 | Bra036257 | A09-1.009            |    |
| R9 | RGC21716c  | 69.55 |           |                      |    |
| R9 | RS2CL2047s | 70.11 | Bra029574 | A09-18.405           |    |
| R9 | F15571     | 70.94 |           |                      |    |
| R9 | RS2CL6991s | 71.22 | Bra026881 | A09-35.842           |    |
| R9 | RGC10800c  | 71.67 |           |                      |    |
| R9 | RGB21550c  | 71.67 |           |                      |    |
| R9 | RGB6475c   | 71.67 |           |                      |    |
| R9 | RGC13816c  | 71.99 |           |                      |    |

|    |            |        |           |                      |    |
|----|------------|--------|-----------|----------------------|----|
| R9 | Rs2CL1347s | 72.64  | Bra036285 | A09-0.838            | 45 |
| R9 | CC83       | 73.17  |           |                      | 45 |
| R9 | RGC12399c  | 73.22  |           |                      | 45 |
| R9 | Rs2CL2196s | 73.8   | Bra000879 | A03-13.686           | 45 |
| R9 | RS2CL964s  | 74.73  | Bra000933 | A03-14.02            | 45 |
| R9 | RSS1474    | 75.03  | Bra037338 | A09-0.146            | 45 |
| R9 | RGC7982c   | 75.19  | Bra037404 | A09-0.45             | 45 |
| R9 | RS2CL7317s | 75.75  | Bra037366 | A09-0.292            | 45 |
| R9 | RSS1063    | 76.03  | Bra039831 | Scaffold000178-0.122 | 45 |
| R9 | RS2CL6758s | 76.06  | Bra037389 | A09-0.388            | 45 |
| R9 | OPT17H     | 77.07  |           |                      | 45 |
| R9 | RGB4147c   | 77.1   | Bra037211 | A09-5.008            | 45 |
| R9 | RGC5522c   | 77.1   | Bra037306 | A09-0.007            | 45 |
| R9 | RGC8507c   | 77.1   |           |                      | 45 |
| R9 | RGC9843c   | 77.67  | Bra036148 | A09-2.235            | 45 |
| R9 | RS2CL3567s | 77.68  | Bra037326 | A09-0.085            | 45 |
| R9 | CD32H      | 78.87  |           |                      | 45 |
| R9 | RS2CL3739s | 78.89  | Bra039830 | Scaffold000178-0.119 | 45 |
| R9 | RGC12323c  | 79.54  | Bra024511 | A06-16.942           | 45 |
| R9 | RGC12828c  | 80.03  | Bra037282 | A09-5.171            | 45 |
| R9 | RSS2466    | 81.29  | Bra037403 | A09-0.444            | 45 |
| R9 | Rs2CL2464s | 81.6   | Bra037306 | A09-0.007            | 45 |
| R9 | RSS1475    | 83.65  | Bra034212 | A09-1.31             | 45 |
| R9 | RS2CL3325s | 83.73  | Bra037270 | A09-5.245            | 46 |
| R9 | RGB5484c   | 84.38  |           |                      | 46 |
| R9 | CD85       | 85.22  |           |                      | 46 |
| R9 | Rs2CL1958s | 88.92  | Bra036700 | A09-5.965            | 46 |
| R9 | RGB28103c  | 89.98  | Bra027759 | A09-6.851            | 46 |
| R9 | RGC11199c  | 91.4   | Bra036646 | A09-6.31             | 46 |
| R9 | RGC674c    | 91.4   |           |                      | 46 |
| R9 | RS2CL832s  | 92.4   | Bra027661 | A09-7.483            | 46 |
| R9 | RGC684c    | 93.01  |           |                      | 46 |
| R9 | RS2CL2118s | 93.38  | Bra027664 | A09-7.472            | 46 |
| R9 | RGC7548c   | 94.07  | Bra027745 | A09-6.926            | 46 |
| R9 | RS2CL1196s | 94.92  | Bra027741 | A09-6.946            | 46 |
| R9 | RS2CL1395s | 95.28  | Bra027717 | A09-7.107            | 46 |
| R9 | RGC5191c   | 95.61  |           |                      | 46 |
| R9 | CC43a      | 96.44  |           |                      | 46 |
| R9 | CA80       | 100.44 |           |                      | 46 |
| R9 | RGC3235c   | 100.54 |           |                      | 46 |
| R9 | CC43aN     | 102.49 |           |                      | 46 |
| R9 | RS2CL4058s | 103.77 | Bra027021 | A09-8.112            | 46 |
| R9 | RGA1616s   | 104.73 | Bra029601 | A05-23.773           |    |
| R9 | RGC22627c  | 105.86 |           |                      |    |
| R9 | RGC19925c  | 107.01 |           |                      |    |
| R9 | RGC2049c   | 107.01 |           |                      |    |



|    |            |        |           |            |    |
|----|------------|--------|-----------|------------|----|
| R9 | RSS0140    | 107.54 | Bra026489 | A09-3.228  | 47 |
| R9 | RGA1944s   | 108.16 |           |            | 47 |
| R9 | OPT09b     | 108.7  |           |            | 47 |
| R9 | RSS2575    | 111.7  | Bra036604 | A09-2.612  | 47 |
| R9 | RSS1301    | 112.3  | Bra036607 | A09-2.596  | 47 |
| R9 | RGC2698c   | 113.43 | Bra036604 | A09-2.612  | 47 |
| R9 | RGC8995c   | 113.43 |           |            | 47 |
| R9 | RGA236s    | 113.58 |           |            | 47 |
| R9 | Rs2CL1221s | 114.17 | Bra036570 | A09-2.772  | 47 |
| R9 | RGC7515c   | 115.38 |           |            | 47 |
| R9 | RS2CL4042s | 115.45 | Bra036111 | A09-2.419  | 47 |
| R9 | RS2CL7387s | 115.76 | Bra036137 | A09-2.317  | 47 |
| R9 | RS2CL2007s | 115.93 | Bra036125 | A09-2.365  | 47 |
| R9 | CD11bH     | 116.39 |           |            | 47 |
| R9 | RGC1736c   | 117.63 |           |            | 47 |
| R9 | RS2CL7327s | 117.9  | Bra036223 | A09-1.878  | 47 |
| R9 | RS2CL6327s | 118.34 | Bra036177 | A09-2.077  | 47 |
| R9 | RGC13248c  | 118.48 | Bra039071 | A09-1.616  | 47 |
| R9 | Rs2CL2203s | 118.74 | Bra036221 | A09-1.888  | 47 |
| R9 | RGB15203c  | 118.97 | Bra017346 | A09-14.707 | 47 |
| R9 | RS2CL2614s | 119.09 | Bra039046 | A09-1.769  | 47 |
| R9 | RGA2478s   | 119.76 |           |            |    |
| R9 | RSS1954    | 119.83 | Bra017336 | A09-14.756 |    |
| R9 | RS2CL6430s | 120.43 | Bra036154 | A09-2.19   |    |
| R9 | RGC14934c  | 121.15 | Bra026462 | A09-3.092  |    |
| R9 | RS2CL5708s | 121.78 | Bra017380 | A09-14.316 |    |
| R9 | RGC6292c   | 123.13 |           |            |    |
| R9 | RGC9998c   | 123.13 |           |            |    |
| R9 | RSS2285    | 123.16 | Bra025140 | A06-22.193 |    |
| R9 | RGC6034c   | 123.28 |           |            |    |
| R9 | RGC7030c   | 123.28 |           |            |    |
| R9 | CA34a      | 123.73 |           |            |    |
| R9 | CC16       | 124.23 |           |            |    |
| R9 | RGC5701c   | 124.31 | Bra035945 | A09-3.404  |    |
| R9 | RGB12822c  | 125.73 | Bra038389 | A09-15.488 | 48 |
| R9 | RGB19618c  | 125.77 | Bra017539 | A09-12.935 | 48 |
| R9 | RGC560c    | 126.31 | Bra017563 | A09-12.615 | 48 |
| R9 | RS2CL4118s | 127.34 | Bra027569 | A09-11.817 | 48 |
| R9 | RSS1035    | 127.52 | Bra017511 | A09-13.238 | 48 |
| R9 | RS2CL5486s | 127.93 | Bra017581 | A09-12.492 | 48 |
| R9 | RGC1999c   | 128.49 | Bra017567 | A09-12.561 | 48 |
| R9 | RSS3287    | 128.67 | Bra017502 | A09-13.31  | 48 |
| R9 | RGC5007c   | 128.91 |           |            | 48 |
| R9 | RS2CL3231s | 129.25 | Bra027460 | A09-10.943 | 48 |
| R9 | RS2CL5203s | 129.51 | Bra027497 | A09-11.289 | 48 |
| R9 | RGC2070c   | 130    | Bra027450 | A09-10.872 | 48 |

|    |            |        |           |                     |    |
|----|------------|--------|-----------|---------------------|----|
| R9 | RGC23150c  | 130    |           |                     | 48 |
| R9 | RGB2543c   | 130    |           |                     | 48 |
| R9 | RGC5810c   | 130    | Bra027462 | A09-10.955          | 48 |
| R9 | RGC6156c   | 130    |           |                     | 48 |
| R9 | RGB8501c   | 130    | Bra027570 | A09-11.826          | 48 |
| R9 | RSS1133    | 130.12 | Bra017577 | A09-12.514          | 48 |
| R9 | RS2CL5024s | 130.79 | Bra027882 | A09-10              | 48 |
| R9 | RSS0093    | 130.8  | Bra027536 | A09-11.614          | 48 |
| R9 | RS2CL3112s | 131.1  | Bra027877 | A09-9.941           | 48 |
| R9 | RSS1329    | 131.1  | Bra027544 | A09-11.661          | 48 |
| R9 | RS2CL4174s | 131.25 | Bra027877 | A09-9.941           | 48 |
| R9 | Gpi        | 131.48 |           |                     | 48 |
| R9 | RS2CL5963s | 131.63 | Bra027880 | A09-9.978           | 48 |
| R9 | RSS3041    | 131.77 | Bra027509 | A09-11.376          | 48 |
| R9 | RS2CL7452s | 131.96 | Bra027836 | A09-9.538           | 48 |
| R9 | RSS0603    | 132.16 | Bra027506 | A09-11.362          | 48 |
| R9 | RS2CL1949s | 132.17 | Bra027125 | A09-9.094           | 48 |
| R9 | RGC2758c   | 132.35 |           |                     | 48 |
| R9 | RGC5530c   | 132.35 | Bra027908 | A09-10.177          | 48 |
| R9 | RGC8742c   | 132.56 |           |                     | 48 |
| R9 | CA35a      | 132.74 |           |                     | 48 |
| R9 | RS2CL5908s | 133.03 | Bra027821 | A09-9.45            | 48 |
| R9 | RGC10531c  | 133.65 | Bra027869 | A09-9.853           | 48 |
| R9 | RGC6519c   | 134.07 |           |                     | 48 |
| R9 | RGB13054c  | 134.36 | Bra035838 | A09-3.97            | 48 |
| R9 | RS2CL1116s | 134.82 | Bra027932 | A09-10.377          | 48 |
| R9 | RS2CL3917s | 135.53 | Bra027860 | A09-9.763           | 48 |
| R9 | RSS0155    | 136.73 | Bra035877 | A09-3.76            | 49 |
| R9 | RS2CL5880s | 137.21 | Bra038912 | Scaffold000155-0.01 | 49 |
| R9 | RSS1128    | 138.23 | Bra037843 | A09-4.459           | 49 |
| R9 | RS2CL2842s | 138.53 | Bra037157 | A09-4.715           | 49 |
| R9 | RSS2113    | 139.63 |           |                     | 49 |
| R9 | RSS1425    | 141.43 | Bra035875 | A09-3.79            | 49 |
| R9 | Rs2CL1695s | 143.22 | Bra027462 | A09-10.955          |    |
| R9 | RGC15178c  | 146.77 | Bra017388 | A09-14.269          |    |

---

Table S15 A summary of genetic map

| LG    | Number of markers | Length of linkage (cM) | Correspondence         |
|-------|-------------------|------------------------|------------------------|
|       |                   |                        | Shirasawa et al (2011) |
| R1    | 179               | 95.7                   | LG9                    |
| R2    | 349               | 146.7                  | LG5                    |
| R3    | 194               | 101.2                  | LG8                    |
| R4    | 392               | 142.2                  | LG4                    |
| R5    | 379               | 154.2                  | LG3                    |
| R6    | 339               | 167.7                  | LG2                    |
| R7    | 248               | 109.9                  | LG1                    |
| R8    | 226               | 101.4                  | LG7                    |
| R9    | 247               | 146.8                  | LG6                    |
| Total | 2,553             | 1165.8                 |                        |



|    |            |       |   |      |    |      |                |        |        |        |       |       |       |
|----|------------|-------|---|------|----|------|----------------|--------|--------|--------|-------|-------|-------|
| R1 | CC67aH     | 22.94 |   |      |    |      |                |        |        |        |       |       |       |
| R1 | RGC1996c   | 22.96 | - | 458  | 0  | 458  | Rsa1.0_00419.1 | 86562  | 43130  | 43588  | 100.0 | 100.0 | 100.0 |
| R1 | RSS3090    | 25.32 | - | 482  | 0  | 482  | Rsa1.0_01749.1 | 39822  | 33735  | 34376  | 94.0  | 100.0 | 133.0 |
| R1 | RSS2047    | 29.92 | + | 861  | 0  | 861  | Rsa1.0_00453.1 | 83031  | 64322  | 65512  | 70.0  | 100.0 | 138.2 |
| R1 | RGC1509c   | 30.59 | - | 426  | 0  | 426  | Rsa1.0_00018.1 | 410899 | 259731 | 260154 | 98.4  | 100.0 | 99.3  |
| R1 | RGC6821c   | 30.59 | - | 412  | 0  | 412  | Rsa1.0_00018.1 | 410899 | 11311  | 11723  | 100.0 | 100.0 | 100.0 |
| R1 | RS2CL7575s | 30.89 | + | 871  | 1  | 871  | Rsa1.0_00453.1 | 83031  | 18117  | 19715  | 50.6  | 99.9  | 183.7 |
| R1 | RSS0938    | 30.91 | + | 839  | 0  | 839  | Rsa1.0_00911.1 | 59943  | 14883  | 16152  | 91.4  | 100.0 | 151.3 |
| R1 | RSS3778    | 31.31 | - | 419  | 0  | 419  | Rsa1.0_05026.1 | 15095  | 10013  | 10436  | 89.0  | 100.0 | 101.0 |
| R1 | RGA2384s   | 32.66 |   |      |    |      |                |        |        |        |       |       |       |
| R1 | RS2CL7786s | 32.99 | + | 956  | 3  | 956  | Rsa1.0_00065.1 | 454616 | 254014 | 255149 | 95.3  | 99.7  | 119.1 |
| R1 | RS2CL5804s | 33.35 | - | 985  | 2  | 984  | Rsa1.0_00965.1 | 58139  | 49431  | 50413  | 89.3  | 99.7  | 100.0 |
| R1 | RS2CL4651s | 34    | - | 758  | 1  | 726  | Rsa1.0_01724.1 | 40292  | 384    | 1486   | 92.6  | 95.7  | 152.0 |
| R1 | RS2CL5128s | 34.14 | - | 838  | 29 | 838  | Rsa1.0_02928.1 | 26680  | 25587  | 26484  | 79.0  | 96.5  | 110.9 |
| R1 | RS2CL7214s | 34.53 | + | 1017 | 0  | 1017 | Rsa1.0_00065.1 | 454616 | 207434 | 208714 | 99.8  | 100.0 | 125.9 |
| R1 | RS2CL6905s | 34.74 | - | 1061 | 1  | 1061 | Rsa1.0_00065.1 | 454616 | 132936 | 133989 | 95.9  | 99.9  | 99.3  |
| R1 | RS2CL6317s | 35.31 | - | 947  | 39 | 947  | Rsa1.0_00065.1 | 454616 | 58810  | 59890  | 90.8  | 95.9  | 118.9 |
| R1 | RS2CL5226s | 36.21 | - | 1230 | 2  | 1228 |                | 77375  | 54316  | 55700  | 96.8  | 99.7  | 112.9 |
| R1 | RGA2190s   | 37.05 |   |      |    |      |                |        |        |        |       |       |       |
| R1 | RGC6748c   | 37.13 | + | 440  | 0  | 440  | Rsa1.0_00734.1 | 66508  | 10958  | 11398  | 100.0 | 100.0 | 100.0 |
| R1 | RGA2261s   | 37.39 |   |      |    |      |                |        |        |        |       |       |       |
| R1 | RS2CL2084s | 37.59 | - | 740  | 4  | 736  | Rsa1.0_04142.1 | 18861  | 12654  | 13558  | 97.2  | 98.9  | 123.5 |
| R1 | RGA2423s   | 38.18 |   |      |    |      |                |        |        |        |       |       |       |
| R1 | RGC3130c   | 38.24 | + | 461  | 0  | 461  | Rsa1.0_00911.1 | 59943  | 16867  | 17328  | 100.0 | 100.0 | 100.0 |
| R1 | RGC11798c  | 38.54 | - | 440  | 0  | 440  | Rsa1.0_00065.1 | 454616 | 412135 | 412575 | 100.0 | 100.0 | 100.0 |
| R1 | RGC18142c  | 38.54 | - | 515  | 1  | 515  | Rsa1.0_00380.1 | 89748  | 66872  | 67386  | 99.8  | 99.8  | 100.0 |
| R1 | RGC9409c   | 38.54 | - | 429  | 0  | 429  | Rsa1.0_00065.1 | 454616 | 250496 | 250925 | 98.8  | 100.0 | 100.0 |
| R1 | RGC2192c   | 39.98 | + | 475  | 0  | 475  | Rsa1.0_00015.1 | 561803 | 446513 | 446988 | 100.0 | 100.0 | 100.0 |
| R1 | RGC23031c  | 39.98 | + | 452  | 0  | 452  | Rsa1.0_00015.1 | 561803 | 284971 | 285423 | 100.0 | 100.0 | 100.0 |
| R1 | RGC5476c   | 39.98 | - | 495  | 0  | 495  |                | 77375  | 62331  | 62826  | 84.7  | 100.0 | 100.0 |
| R1 | RSS0987    | 40.32 | + | 894  | 68 | 894  | Rsa1.0_00015.1 | 561803 | 352322 | 353148 | 81.9  | 92.4  | 100.0 |
| R1 | RSS1811    | 41.12 | - | 451  | 1  | 451  | Rsa1.0_00805.1 | 63724  | 43178  | 43615  | 93.8  | 99.8  | 97.1  |
| R1 | RGC13289c  | 41.33 | + | 472  | 0  | 472  | Rsa1.0_00067.1 | 415055 | 65195  | 65667  | 100.0 | 100.0 | 100.0 |
| R1 | RGC6011c   | 41.33 | - | 422  | 0  | 422  | Rsa1.0_00876.1 | 61328  | 8099   | 8521   | 100.0 | 100.0 | 100.0 |
| R1 | RS2CL4282s | 41.98 | + | 693  | 5  | 693  | Rsa1.0_00805.1 | 63724  | 13361  | 14114  | 96.3  | 99.3  | 109.5 |
| R1 | RSS2736    | 42.7  | + | 812  | 0  | 812  | Rsa1.0_00067.1 | 415055 | 247438 | 248459 | 96.1  | 100.0 | 125.7 |

|    |            |       |   |      |    |      |                |        |        |        |       |       |       |
|----|------------|-------|---|------|----|------|----------------|--------|--------|--------|-------|-------|-------|
| R1 | RGC6858c   | 43.24 | + | 449  | 0  | 449  | Rsa1.0_00204.1 | 109056 | 58645  | 59094  | 45.0  | 100.0 | 100.0 |
| R1 | RGB9500c   | 44.09 | + | 408  | 0  | 408  | Rsa1.0_00600.1 | 73395  | 69576  | 70364  | 99.8  | 100.0 | 193.1 |
| R1 | RGC453c    | 44.55 | + | 406  | 53 | 406  | Rsa1.0_00059.1 | 159650 | 14824  | 15177  | 81.5  | 87.0  | 100.0 |
| R1 | RGB7310c   | 44.55 | - | 452  | 0  | 452  | Rsa1.0_02253.1 | 33356  | 11895  | 12357  | 95.4  | 100.0 | 102.2 |
| R1 | RGC12216c  | 45.06 | + | 402  | 0  | 402  | Rsa1.0_00346.1 | 93130  | 57437  | 57839  | 100.0 | 100.0 | 100.0 |
| R1 | OPE20b     | 45.24 |   |      |    |      |                |        |        |        |       |       |       |
| R1 | RS2CL2578s | 45.38 | - | 1175 | 2  | 1174 | Rsa1.0_00067.1 | 415055 | 377758 | 379940 | 95.9  | 99.7  | 186.2 |
| R1 | RSS2094    | 45.53 | + | 811  | 0  | 811  | Rsa1.0_01344.1 | 142535 | 109884 | 110835 | 84.3  | 100.0 | 117.3 |
| R1 | RS2CL2020s | 46.15 | - | 1326 | 1  | 1324 | Rsa1.0_03366.1 | 23401  | 8628   | 10694  | 99.2  | 99.8  | 156.2 |
| R1 | CB28       | 46.91 |   |      |    |      |                |        |        |        |       |       |       |
| R1 | RS2CL5101s | 47.07 | + | 984  | 0  | 984  | Rsa1.0_00067.1 | 415055 | 6328   | 7816   | 98.1  | 100.0 | 151.2 |
| R1 | RS2CL2643s | 47.2  | + | 832  | 2  | 832  | Rsa1.0_00059.1 | 159650 | 121124 | 122276 | 86.7  | 99.8  | 138.8 |
| R1 | RS2CL3579s | 47.2  | - | 1628 | 1  | 1627 | Rsa1.0_00059.1 | 159650 | 38597  | 40319  | 96.4  | 99.9  | 105.9 |
| R1 | RSS1945    | 47.4  | + | 794  | 0  | 794  | Rsa1.0_00059.1 | 159650 | 121139 | 122234 | 92.6  | 100.0 | 137.9 |
| R1 | RSS3875    | 47.5  | - | 866  | 0  | 866  | Rsa1.0_00059.1 | 159650 | 133924 | 135118 | 98.9  | 100.0 | 137.9 |
| R1 | RS2CL5231s | 47.52 | + | 952  | 3  | 952  | Rsa1.0_02210.1 | 33857  | 2694   | 5231   | 90.8  | 99.7  | 267.3 |
| R1 | RS2CL4686s | 48.3  | - | 1219 | 1  | 1206 | Rsa1.0_00059.1 | 159650 | 88691  | 90890  | 97.8  | 98.9  | 182.5 |
| R1 | RSS2326    | 48.67 | - | 826  | 0  | 826  |                | 49419  | 30932  | 32156  | 99.3  | 100.0 | 148.2 |
| R1 | Pgm        | 48.77 |   |      |    |      |                |        |        |        |       |       |       |
| R1 | RGC3295c   | 49.44 | + | 426  | 0  | 426  | Rsa1.0_01600.1 | 42537  | 4897   | 5323   | 100.0 | 100.0 | 100.0 |
| R1 | RGA2466s   | 50.02 |   |      |    |      |                |        |        |        |       |       |       |
| R1 | CC11       | 50.93 |   |      |    |      |                |        |        |        |       |       |       |
| R1 | RS2CL7272s | 50.99 | - | 718  | 0  | 717  | Rsa1.0_02210.1 | 33857  | 30253  | 31059  | 96.8  | 99.9  | 112.4 |
| R1 | RGC14226c  | 51.66 | - | 562  | 0  | 562  | Rsa1.0_00204.1 | 109056 | 77526  | 78087  | 99.8  | 100.0 | 99.8  |
| R1 | RS2CL7240s | 52.01 | - | 685  | 0  | 682  | Rsa1.0_02387.1 | 31890  | 16724  | 17783  | 86.0  | 99.6  | 155.3 |
| R1 | RS2CL7289s | 53.29 | + | 754  | 1  | 754  | Rsa1.0_07613.1 | 9021   | 2349   | 3509   | 75.7  | 99.9  | 154.1 |
| R1 | RGC13028c  | 53.92 | - | 519  | 0  | 519  | Rsa1.0_00204.1 | 109056 | 14089  | 14608  | 100.0 | 100.0 | 100.0 |
| R1 | RS2CL3783s | 54.59 | + | 860  | 0  | 859  | Rsa1.0_01091.1 | 54383  | 48071  | 49970  | 84.0  | 99.9  | 221.1 |
| R1 | RS2CL8267s | 55.77 | + | 887  | 0  | 887  | Rsa1.0_02939.1 | 26595  | 10284  | 11478  | 96.8  | 100.0 | 134.6 |
| R1 | RGC14293c  | 56.66 | - | 499  | 0  | 499  | Rsa1.0_00050.1 | 237174 | 87408  | 87907  | 100.0 | 100.0 | 100.0 |
| R1 | RGB1137c   | 58.06 | - | 581  | 0  | 581  | Rsa1.0_02910.1 | 26843  | 25508  | 26089  | 100.0 | 100.0 | 100.0 |
| R1 | RGC18589c  | 58.06 | + | 429  | 0  | 429  | Rsa1.0_00021.1 | 263655 | 7664   | 8093   | 100.0 | 100.0 | 100.0 |
| R1 | RSS0325    | 59.29 | - | 826  | 0  | 593  | Rsa1.0_04734.1 | 16184  | 4508   | 5101   | 52.5  | 71.8  | 100.0 |
| R1 | RSS4011    | 59.79 | + | 909  | 1  | 909  | Rsa1.0_02110.1 | 34919  | 22282  | 23191  | 90.5  | 99.9  | 100.1 |
| R1 | RS2CL7006s | 61.13 | + | 626  | 4  | 625  | Rsa1.0_00021.1 | 263655 | 80112  | 80991  | 96.8  | 99.2  | 141.6 |
| R1 | RGC15930c  | 61.77 | - | 549  | 0  | 549  | Rsa1.0_00065.1 | 454616 | 26253  | 26802  | 100.0 | 100.0 | 100.0 |

|    |            |       |   |      |    |      |                |        |        |        |       |       |       |
|----|------------|-------|---|------|----|------|----------------|--------|--------|--------|-------|-------|-------|
| R1 | RGC3696c   | 62.07 |   |      |    |      |                |        |        |        |       |       |       |
| R1 | RS2CL7647s | 62.83 | + | 693  | 0  | 693  | Rsa1.0_00021.1 | 263655 | 179001 | 179866 | 97.4  | 100.0 | 124.8 |
| R1 | RGC11904c  | 63.88 | + | 430  | 0  | 430  | Rsa1.0_00021.1 | 263655 | 66560  | 66990  | 100.0 | 100.0 | 100.0 |
| R1 | RGC7796c   | 63.88 | - | 467  | 0  | 245  | Rsa1.0_00021.1 | 263655 | 257072 | 257317 | 52.5  | 52.5  | 100.0 |
| R1 | RS2CL4233s | 64.51 | - | 1026 | 35 | 1025 | Rsa1.0_03193.1 | 24690  | 8281   | 9272   | 88.2  | 96.5  | 100.1 |
| R1 | RGC12943c  | 64.75 | + | 437  | 0  | 437  | Rsa1.0_03633.1 | 21644  | 5961   | 6398   | 100.0 | 100.0 | 100.0 |
| R1 | RGC15280c  | 64.75 | - | 408  | 0  | 408  | Rsa1.0_01190.1 | 194501 | 157316 | 157724 | 100.0 | 100.0 | 100.0 |
| R1 | RS2CL7501s | 65.71 | + | 908  | 3  | 902  | Rsa1.0_02054.1 | 35548  | 23043  | 24021  | 93.3  | 99.0  | 108.8 |
| R1 | RS2CL5860s | 66.58 | - | 460  | 99 | 460  | Rsa1.0_00519.1 | 197864 | 65704  | 66065  | 77.6  | 78.5  | 100.0 |
| R1 | RSS2045    | 66.67 | - | 744  | 0  | 744  |                | 606987 | 447549 | 448386 | 96.2  | 100.0 | 112.5 |
| R1 | RSS2843    | 66.67 | - | 861  | 10 | 861  |                | 606987 | 468762 | 469853 | 95.4  | 98.8  | 128.2 |
| R1 | RSS3638    | 66.67 | + | 691  | 1  | 691  |                | 396176 | 186772 | 187491 | 95.5  | 99.9  | 104.2 |
| R1 | RGC14452c  | 68.11 |   |      |    |      |                |        |        |        |       |       |       |
| R1 | RSS0679    | 68.37 | + | 747  | 9  | 747  | Rsa1.0_01190.1 | 194501 | 9120   | 10343  | 98.8  | 98.8  | 165.7 |
| R1 | RGB2900c   | 68.82 | + | 429  | 0  | 429  | Rsa1.0_00453.1 | 83031  | 64685  | 65114  | 100.0 | 100.0 | 100.0 |
| R1 | RSS0442    | 69.17 | - | 819  | 0  | 819  | Rsa1.0_16049.1 | 2306   | 1040   | 1859   | 99.8  | 100.0 | 100.0 |
| R1 | RSS0913    | 71.47 | - | 710  | 0  | 708  |                | 88681  | 34712  | 35733  | 99.7  | 99.7  | 144.2 |
| R1 | RS2CL2130s | 71.65 | - | 883  | 3  | 883  | Rsa1.0_00459.1 | 82580  | 41014  | 42357  | 99.6  | 99.7  | 152.6 |
| R1 | RSS3818    | 72.83 | - | 894  | 0  | 884  | Rsa1.0_02209.1 | 33873  | 10295  | 11180  | 61.6  | 98.9  | 100.1 |
| R1 | Rs2CL1826s | 72.89 | + | 708  | 0  | 708  | Rsa1.0_00459.1 | 82580  | 56624  | 57741  | 71.6  | 100.0 | 157.8 |
| R1 | RGC897c    | 73.47 | - | 512  | 0  | 512  | Rsa1.0_00462.1 | 82288  | 41837  | 42349  | 100.0 | 100.0 | 100.0 |
| R1 | RGC20779c  | 74.35 | + | 456  | 0  | 456  | Rsa1.0_01499.1 | 44555  | 42687  | 43143  | 70.4  | 100.0 | 100.0 |
| R1 | RGB3655c   | 75.57 | - | 420  | 0  | 420  | Rsa1.0_12212.1 | 5287   | 3558   | 3978   | 46.7  | 100.0 | 100.0 |
| R1 | RGB1443c   | 76.34 | + | 407  | 0  | 407  |                | 69858  | 62749  | 63227  | 88.7  | 100.0 | 117.4 |
| R1 | RS2CL7691s | 76.63 | - | 624  | 1  | 624  | Rsa1.0_00943.1 | 58862  | 6633   | 8828   | 97.3  | 99.8  | 352.3 |
| R1 | RSS0997    | 77.39 | - | 872  | 0  | 872  |                | 329018 | 206985 | 208282 | 97.3  | 100.0 | 148.7 |
| R1 | RGC23207c  | 77.65 | - | 594  | 0  | 296  | Rsa1.0_01017.1 | 56714  | 38900  | 39196  | 42.3  | 49.8  | 100.0 |
| R1 | RGC4403c   | 77.65 | + | 421  | 0  | 421  | Rsa1.0_00808.1 | 63351  | 39275  | 39696  | 100.0 | 100.0 | 100.0 |
| R1 | RGC715c    | 77.65 | + | 468  | 0  | 468  | Rsa1.0_01346.1 | 47618  | 13473  | 13941  | 100.0 | 100.0 | 100.0 |
| R1 | RS2CL8104s | 78.05 | + | 1114 | 1  | 1114 | Rsa1.0_00462.1 | 82288  | 1235   | 2411   | 98.7  | 99.9  | 105.7 |
| R1 | RSS0923    | 78.13 | + | 844  | 0  | 843  | Rsa1.0_00155.1 | 118465 | 51111  | 52940  | 98.7  | 99.9  | 217.0 |
| R1 | RS2CL5132s | 78.61 | + | 835  | 1  | 835  | Rsa1.0_01999.1 | 36237  | 14503  | 15788  | 96.1  | 99.9  | 154.1 |
| R1 | RS2CL1854s | 78.75 | + | 651  | 1  | 644  | Rsa1.0_01673.1 | 41197  | 7446   | 8102   | 96.8  | 98.8  | 102.0 |
| R1 | RSS1995    | 79.15 | - | 539  | 3  | 403  | Rsa1.0_01215.1 | 166813 | 160027 | 160482 | 72.9  | 74.2  | 113.8 |
| R1 | RGC1879c   | 79.18 |   |      |    |      |                |        |        |        |       |       |       |
| R1 | RS2CL5940s | 79.53 | + | 740  | 0  | 655  | Rsa1.0_01780.1 | 39411  | 2824   | 3469   | 83.5  | 88.5  | 98.5  |







|    |            |       |   |      |     |      |                |        |        |        |       |       |       |
|----|------------|-------|---|------|-----|------|----------------|--------|--------|--------|-------|-------|-------|
| R2 | RS2CL2152s | 16.82 | - | 1042 | 2   | 1042 | Rsa1.0_00693.1 | 161311 | 60094  | 61424  | 90.2  | 99.8  | 127.9 |
| R2 | RSS1640    | 16.9  | - | 824  | 0   | 824  | Rsa1.0_01634.1 | 41865  | 38910  | 40639  | 88.4  | 100.0 | 209.8 |
| R2 | RGC17861c  | 17.15 | + | 542  | 0   | 542  | Rsa1.0_01010.1 | 56906  | 8931   | 9473   | 60.3  | 100.0 | 100.0 |
| R2 | RGA1922s   | 17.24 |   |      |     |      |                |        |        |        |       |       |       |
| R2 | RS2CL7559s | 17.37 | - | 1390 | 0   | 1390 |                | 301669 | 191693 | 193217 | 57.2  | 100.0 | 109.6 |
| R2 | RS2CL826s  | 17.52 | - | 1077 | 6   | 1077 |                | 301669 | 238083 | 239810 | 95.8  | 99.4  | 161.3 |
| R2 | RS2CL6429s | 17.75 | - | 780  | 0   | 780  | Rsa1.0_00461.1 | 82509  | 19937  | 20815  | 99.0  | 100.0 | 112.6 |
| R2 | RS2CL4831s | 17.76 | - | 1083 | 1   | 1078 |                | 301669 | 282414 | 283492 | 97.5  | 99.5  | 100.1 |
| R2 | RS2CL3429s | 17.76 | + | 500  | 4   | 499  |                | 301669 | 294783 | 295429 | 94.0  | 99.0  | 130.5 |
| R2 | RS2CL6141s | 17.92 | + | 947  | 112 | 945  | Rsa1.0_04478.1 | 17183  | 2594   | 3587   | 84.8  | 88.0  | 119.2 |
| R2 | RS2CL2740s | 18.06 | + | 1225 | 2   | 1225 | Rsa1.0_01010.1 | 56906  | 23346  | 25927  | 96.2  | 99.8  | 211.0 |
| R2 | RSS1435    | 18.1  | + | 840  | 0   | 840  |                | 167185 | 96460  | 97706  | 75.7  | 100.0 | 148.3 |
| R2 | RSS2508    | 18.2  | + | 718  | 2   | 718  |                | 167185 | 125681 | 126378 | 93.5  | 99.7  | 97.4  |
| R2 | Rs2CL1685s | 18.75 | - | 1012 | 0   | 1012 | Rsa1.0_01634.1 | 41865  | 33091  | 34550  | 96.5  | 100.0 | 144.2 |
| R2 | RS2CL2162s | 19    | + | 801  | 1   | 801  | Rsa1.0_00487.1 | 80674  | 70327  | 71133  | 98.9  | 99.9  | 100.8 |
| R2 | RS2CL1115s | 19.23 | + | 900  | 2   | 900  | Rsa1.0_00127.1 | 127446 | 112975 | 115148 | 94.0  | 99.8  | 242.0 |
| R2 | RSS1796    | 19.4  | + | 493  | 4   | 493  | Rsa1.0_00127.1 | 127446 | 24931  | 25592  | 88.0  | 99.2  | 135.2 |
| R2 | RS2CL6767s | 19.46 | - | 656  | 0   | 656  | Rsa1.0_00487.1 | 80674  | 17359  | 18280  | 99.4  | 100.0 | 140.4 |
| R2 | RS2CL8214s | 19.55 | - | 833  | 2   | 832  | Rsa1.0_00611.1 | 72410  | 15017  | 15859  | 95.6  | 99.6  | 101.5 |
| R2 | RGC21070c  | 19.59 | + | 518  | 0   | 518  | Rsa1.0_00611.1 | 72410  | 60010  | 60528  | 100.0 | 100.0 | 100.0 |
| R2 | RGC212c    | 19.59 | - | 503  | 0   | 503  | Rsa1.0_00094.1 | 139042 | 79373  | 79876  | 100.0 | 100.0 | 100.0 |
| R2 | RGC2575c   | 19.59 | + | 407  | 0   | 407  | Rsa1.0_02931.1 | 26654  | 14437  | 14844  | 100.0 | 100.0 | 100.0 |
| R2 | RGC2666c   | 19.59 |   |      |     |      |                |        |        |        |       |       |       |
| R2 | RGC6462c   | 19.59 | - | 410  | 0   | 410  | Rsa1.0_00464.1 | 82253  | 11150  | 11560  | 100.0 | 100.0 | 100.0 |
| R2 | RS2CL4022s | 19.85 | + | 981  | 2   | 897  | Rsa1.0_00094.1 | 139042 | 89983  | 91232  | 57.5  | 91.2  | 139.6 |
| R2 | Rs2CL1791s | 19.86 | + | 458  | 1   | 457  | Rsa1.0_00762.1 | 165246 | 64387  | 64970  | 87.3  | 99.6  | 127.9 |
| R2 | RGC16214c  | 19.95 | - | 504  | 196 | 475  | Rsa1.0_00083.1 | 442773 | 309461 | 309740 | 55.4  | 55.4  | 100.0 |
| R2 | RS2CL7540s | 20.16 | + | 746  | 0   | 746  | Rsa1.0_00464.1 | 82253  | 47661  | 49076  | 58.6  | 100.0 | 189.7 |
| R2 | RGC22795c  | 20.7  | + | 557  | 0   | 557  | Rsa1.0_00668.1 | 69421  | 61597  | 62154  | 100.0 | 100.0 | 100.0 |
| R2 | RS2CL6543s | 20.72 | + | 1273 | 0   | 1273 | Rsa1.0_00017.1 | 752458 | 743111 | 745235 | 96.9  | 100.0 | 166.9 |
| R2 | RS2CL3997s | 20.74 | - | 878  | 0   | 876  |                | 167185 | 119899 | 121160 | 96.9  | 99.8  | 144.0 |
| R2 | RSS3566    | 20.9  | - | 866  | 3   | 866  | Rsa1.0_02358.1 | 32213  | 8176   | 9440   | 85.0  | 99.7  | 146.5 |
| R2 | RGC4451c   | 21.13 | - | 497  | 0   | 497  |                | 167185 | 75879  | 76376  | 100.0 | 100.0 | 100.0 |
| R2 | RS2CL1822s | 21.21 | + | 1755 | 1   | 1755 | Rsa1.0_03209.1 | 24592  | 16799  | 19317  | 98.8  | 99.9  | 143.6 |
| R2 | RGC4476c   | 21.51 | + | 453  | 0   | 453  | Rsa1.0_00729.1 | 66690  | 59266  | 59719  | 100.0 | 100.0 | 100.0 |
| R2 | RS2CL5248s | 21.66 | - | 820  | 0   | 815  | Rsa1.0_00017.1 | 752458 | 416174 | 416989 | 93.8  | 99.4  | 100.0 |

|    |            |       |   |      |    |      |                |        |        |        |       |       |       |
|----|------------|-------|---|------|----|------|----------------|--------|--------|--------|-------|-------|-------|
| R2 | RS2CL6952s | 21.76 | - | 730  | 2  | 717  | Rsa1.0_00017.1 | 752458 | 398380 | 399827 | 97.0  | 98.0  | 202.4 |
| R2 | RSS0957    | 21.9  | - | 871  | 2  | 871  | Rsa1.0_00356.1 | 91521  | 4827   | 5696   | 99.8  | 99.8  | 100.0 |
| R2 | RS2CL5432s | 22.08 | - | 1033 | 2  | 1033 | Rsa1.0_00017.1 | 752458 | 391648 | 394148 | 97.7  | 99.8  | 242.5 |
| R2 | RGC10385c  | 22.23 | - | 402  | 0  | 402  | Rsa1.0_00277.1 | 100132 | 34002  | 34404  | 100.0 | 100.0 | 100.0 |
| R2 | RSS2483    | 22.5  | - | 862  | 0  | 862  | Rsa1.0_00277.1 | 100132 | 39422  | 40284  | 100.0 | 100.0 | 100.0 |
| R2 | RS2CL4657s | 22.51 | - | 948  | 0  | 948  | Rsa1.0_02840.1 | 27386  | 23809  | 25381  | 91.8  | 100.0 | 165.8 |
| R2 | RS2CL4960s | 22.85 | - | 657  | 0  | 657  | Rsa1.0_00277.1 | 100132 | 35699  | 36435  | 98.6  | 100.0 | 112.0 |
| R2 | RS2CL3611s | 23.07 | + | 763  | 1  | 763  | Rsa1.0_00277.1 | 100132 | 61993  | 62792  | 98.4  | 99.9  | 104.9 |
| R2 | RSS3805    | 23.1  | - | 842  | 1  | 842  | Rsa1.0_00729.1 | 66690  | 27221  | 28062  | 96.6  | 99.9  | 100.0 |
| R2 | RGC12573c  | 23.27 | + | 471  | 0  | 471  | Rsa1.0_01015.1 | 56752  | 18181  | 18652  | 100.0 | 100.0 | 100.0 |
| R2 | RGC1566c   | 23.27 | - | 463  | 0  | 463  | Rsa1.0_00721.1 | 66918  | 20575  | 21038  | 100.0 | 100.0 | 100.0 |
| R2 | RGC3643c   | 23.27 | + | 458  | 0  | 458  | Rsa1.0_02358.1 | 32213  | 4211   | 4669   | 98.3  | 100.0 | 100.0 |
| R2 | RGB419c    | 23.27 | + | 464  | 0  | 464  | Rsa1.0_00897.1 | 60498  | 19835  | 20366  | 100.0 | 100.0 | 114.4 |
| R2 | RGC4350c   | 23.27 | + | 446  | 0  | 446  | Rsa1.0_00017.1 | 752458 | 69766  | 70212  | 100.0 | 100.0 | 100.0 |
| R2 | RGB921c    | 23.27 | + | 402  | 0  | 402  | Rsa1.0_00017.1 | 752458 | 607929 | 608331 | 100.0 | 100.0 | 100.0 |
| R2 | RS2CL2632s | 23.29 |   |      |    |      |                |        |        |        |       |       |       |
| R2 | RS2CL2446s | 23.61 | + | 1250 | 2  | 1250 | Rsa1.0_02703.1 | 28544  | 4006   | 10261  | 89.2  | 99.8  | 501.2 |
| R2 | RS2CL1476s | 23.8  | - | 1317 | 0  | 1316 | Rsa1.0_00721.1 | 66918  | 58130  | 59802  | 60.0  | 99.9  | 127.1 |
| R2 | RS2CL1124s | 23.94 | + | 2428 | 0  | 2427 | Rsa1.0_01141.1 | 52530  | 3533   | 7345   | 92.8  | 100.0 | 157.1 |
| R2 | RS2CL5639s | 24.16 | + | 1064 | 3  | 1059 | Rsa1.0_00729.1 | 66690  | 55928  | 57170  | 70.7  | 99.3  | 117.6 |
| R2 | RS2CL3061s | 24.43 | + | 1150 | 2  | 1111 | Rsa1.0_02703.1 | 28544  | 24847  | 26495  | 95.4  | 96.4  | 148.6 |
| R2 | CB72H      | 24.5  |   |      |    |      |                |        |        |        |       |       |       |
| R2 | Rs2CL1639s | 24.64 | + | 779  | 0  | 779  | Rsa1.0_00744.1 | 66084  | 52412  | 53621  | 98.5  | 100.0 | 155.2 |
| R2 | RS2CL8169s | 24.94 | - | 941  | 4  | 941  | Rsa1.0_00744.1 | 66084  | 3356   | 5405   | 95.9  | 99.6  | 218.7 |
| R2 | BRMS036    | 25.2  |   |      |    |      |                |        |        |        |       |       |       |
| R2 | RGC12949c  | 25.36 | + | 580  | 0  | 580  | Rsa1.0_02295.1 | 149884 | 132359 | 132939 | 100.0 | 100.0 | 100.0 |
| R2 | RGC148c    | 25.36 | + | 501  | 0  | 501  | Rsa1.0_02295.1 | 149884 | 22238  | 22739  | 100.0 | 100.0 | 100.0 |
| R2 | RS2CL3052s | 25.46 | - | 728  | 3  | 728  | Rsa1.0_00171.1 | 115622 | 51138  | 52602  | 97.7  | 99.6  | 201.9 |
| R2 | RSS0445    | 25.8  | + | 681  | 0  | 681  | Rsa1.0_04450.1 | 17297  | 11689  | 12594  | 100.0 | 100.0 | 132.9 |
| R2 | RS2CL7090s | 25.88 | + | 748  | 2  | 748  | Rsa1.0_00909.1 | 59976  | 3985   | 5053   | 89.7  | 99.7  | 143.2 |
| R2 | RS2CL4177s | 26.05 | + | 767  | 17 | 767  | Rsa1.0_02295.1 | 149884 | 117484 | 118774 | 95.2  | 97.8  | 172.0 |
| R2 | RSS0802    | 26.3  | - | 718  | 1  | 716  | Rsa1.0_03304.1 | 23883  | 20725  | 21785  | 99.6  | 99.6  | 148.3 |
| R2 | RSS3702    | 26.5  | - | 856  | 0  | 856  | Rsa1.0_00476.1 | 280966 | 7920   | 9372   | 99.8  | 100.0 | 169.6 |
| R2 | RS2CL6599s | 26.65 | + | 1097 | 2  | 1097 | Rsa1.0_03784.1 | 20887  | 12821  | 13958  | 91.6  | 99.8  | 103.8 |
| R2 | RGB3040c   | 26.97 | - | 502  | 0  | 502  | Rsa1.0_02400.1 | 31750  | 14321  | 14833  | 98.2  | 100.0 | 102.0 |
| R2 | RSS1032    | 27    | + | 547  | 0  | 547  | Rsa1.0_00476.1 | 280966 | 147114 | 147663 | 100.0 | 100.0 | 100.4 |

|    |            |       |   |      |     |      |                |        |        |        |       |       |       |
|----|------------|-------|---|------|-----|------|----------------|--------|--------|--------|-------|-------|-------|
| R2 | RS2CL6683s | 27.19 | + | 694  | 1   | 694  | Rsa1.0_00283.1 | 183797 | 65958  | 66735  | 99.7  | 99.9  | 112.1 |
| R2 | RGC7444c   | 27.36 | - | 409  | 9   | 409  | Rsa1.0_03304.1 | 23883  | 9427   | 9827   | 97.8  | 97.8  | 100.0 |
| R2 | Rs2CL2399s | 27.68 |   |      |     |      |                |        |        |        |       |       |       |
| R2 | RGC20165c  | 27.88 | - | 587  | 0   | 587  | Rsa1.0_00476.1 | 280966 | 35824  | 36411  | 99.8  | 100.0 | 100.0 |
| R2 | RGC2344c   | 27.88 | - | 416  | 0   | 416  | Rsa1.0_00121.1 | 278029 | 91060  | 91476  | 100.0 | 100.0 | 100.0 |
| R2 | RGC9866c   | 27.88 | - | 515  | 0   | 515  | Rsa1.0_00630.1 | 71281  | 22897  | 23412  | 100.0 | 100.0 | 100.0 |
| R2 | RSS2114    | 27.9  | - | 860  | 0   | 860  | Rsa1.0_00630.1 | 71281  | 4928   | 5965   | 100.0 | 100.0 | 120.6 |
| R2 | RGC9047c   | 28    | + | 471  | 345 | 471  | Rsa1.0_00630.1 | 71281  | 54590  | 54716  | 26.8  | 26.8  | 100.0 |
| R2 | RS2CL4120s | 28    | + | 824  | 1   | 794  | Rsa1.0_01460.1 | 45255  | 32135  | 33019  | 90.4  | 96.2  | 111.5 |
| R2 | RS2CL831s  | 28.34 | - | 766  | 9   | 765  | Rsa1.0_01460.1 | 45255  | 2071   | 3605   | 64.1  | 98.7  | 202.9 |
| R2 | RS2CL2568s | 28.61 | - | 1243 | 2   | 1243 | Rsa1.0_00121.1 | 278029 | 43470  | 45226  | 93.4  | 99.8  | 141.5 |
| R2 | RS2CL2222s | 28.81 | - | 989  | 0   | 959  | Rsa1.0_00630.1 | 71281  | 21089  | 22524  | 94.4  | 97.0  | 149.6 |
| R2 | RS2CL7550s | 29.06 | - | 1049 | 2   | 1049 | Rsa1.0_00630.1 | 71281  | 61634  | 63089  | 96.7  | 99.8  | 139.0 |
| R2 | RS2CL1001s | 29.17 | - | 756  | 0   | 752  | Rsa1.0_00630.1 | 71281  | 63710  | 64978  | 98.4  | 99.5  | 168.6 |
| R2 | RS2CL2803s | 29.61 | + | 1017 | 5   | 1003 | Rsa1.0_00838.1 | 153820 | 52227  | 53407  | 49.9  | 98.1  | 118.2 |
| R2 | RGC2145c   | 30.12 | + | 421  | 0   | 421  | Rsa1.0_00102.1 | 135497 | 41306  | 41727  | 100.0 | 100.0 | 100.0 |
| R2 | RS2CL3202s | 30.38 | + | 838  | 0   | 836  | Rsa1.0_00198.1 | 222963 | 84022  | 85419  | 99.8  | 99.8  | 167.1 |
| R2 | RSS3094    | 30.5  | - | 844  | 0   | 844  | Rsa1.0_00102.1 | 135497 | 28034  | 29083  | 99.1  | 100.0 | 124.3 |
| R2 | RS2CL3241s | 30.7  | + | 1124 | 2   | 1124 | Rsa1.0_03290.1 | 24011  | 22635  | 23808  | 34.2  | 99.8  | 104.6 |
| R2 | RGC43c     | 31.12 | - | 449  | 0   | 449  | Rsa1.0_00001.1 | 363028 | 53225  | 53674  | 100.0 | 100.0 | 100.0 |
| R2 | RSS2752    | 31.2  | + | 777  | 0   | 777  | Rsa1.0_00198.1 | 222963 | 128619 | 130033 | 95.1  | 100.0 | 182.0 |
| R2 | RS2CL1313s | 31.21 | + | 719  | 0   | 717  | Rsa1.0_00121.1 | 278029 | 122847 | 124309 | 90.4  | 99.7  | 203.9 |
| R2 | RGC7617c   | 31.35 | + | 414  | 0   | 414  | Rsa1.0_00001.1 | 363028 | 311136 | 311550 | 100.0 | 100.0 | 100.0 |
| R2 | RSS2898    | 31.4  | + | 836  | 2   | 836  | Rsa1.0_00198.1 | 222963 | 105082 | 106319 | 97.6  | 99.8  | 148.3 |
| R2 | RS2CL3641s | 31.7  | - | 894  | 4   | 894  | Rsa1.0_00198.1 | 222963 | 176265 | 177333 | 77.7  | 99.6  | 120.0 |
| R2 | RS2CL2961s | 32.19 | + | 1187 | 1   | 1187 | Rsa1.0_01701.1 | 162121 | 144250 | 145583 | 99.5  | 99.9  | 112.4 |
| R2 | RS2CL3459s | 32.49 | - | 707  | 0   | 707  | Rsa1.0_01701.1 | 162121 | 19813  | 20603  | 97.3  | 100.0 | 111.7 |
| R2 | RS2CL1051s | 32.92 | + | 1356 | 2   | 1356 | Rsa1.0_00198.1 | 222963 | 141543 | 143411 | 97.2  | 99.9  | 138.0 |
| R2 | RSS1170    | 33.1  | + | 811  | 4   | 811  | Rsa1.0_00001.1 | 363028 | 279762 | 280931 | 97.7  | 99.5  | 144.9 |
| R2 | RSS2001    | 33.5  | - | 866  | 0   | 866  | Rsa1.0_00001.1 | 363028 | 265429 | 267044 | 94.8  | 100.0 | 186.5 |
| R2 | RS2CL6882s | 33.69 | - | 1125 | 1   | 1125 | Rsa1.0_00198.1 | 222963 | 13519  | 14634  | 91.4  | 99.9  | 99.2  |
| R2 | RS2CL4789s | 35.07 |   |      |     |      |                |        |        |        |       |       |       |
| R2 | RS2CL4931s | 35.07 | + | 1085 | 3   | 1085 | Rsa1.0_00729.1 | 66690  | 48844  | 50228  | 73.7  | 99.7  | 127.9 |
| R2 | RS2CL6206s | 35.07 | + | 874  | 2   | 874  | Rsa1.0_00001.1 | 363028 | 73735  | 74608  | 97.4  | 99.8  | 100.1 |
| R2 | Rs2CL2267s | 35.07 | + | 878  | 11  | 878  | Rsa1.0_00001.1 | 363028 | 92859  | 94113  | 93.4  | 98.8  | 144.6 |
| R2 | RS2CL3897s | 35.7  | - | 1258 | 2   | 1258 | Rsa1.0_02257.1 | 33318  | 18907  | 22221  | 94.1  | 99.8  | 263.9 |

|    |            |       |   |      |   |      |                |        |        |        |       |       |       |
|----|------------|-------|---|------|---|------|----------------|--------|--------|--------|-------|-------|-------|
| R2 | RSS0645    | 36    |   |      |   |      |                |        |        |        |       |       |       |
| R2 | RSS1152    | 36    | - | 843  | 0 | 843  | Rsa1.0_00356.1 | 91521  | 90671  | 91514  | 100.0 | 100.0 | 100.0 |
| R2 | RSS2678    | 36    | + | 791  | 0 | 773  | Rsa1.0_00356.1 | 91521  | 80148  | 81230  | 97.6  | 97.7  | 140.0 |
| R2 | RGC1244c   | 36.02 | + | 492  | 0 | 492  | Rsa1.0_00706.1 | 291570 | 186654 | 187146 | 100.0 | 100.0 | 100.0 |
| R2 | RSS2341    | 36.1  | - | 433  | 8 | 433  | Rsa1.0_00441.1 | 84607  | 19085  | 19513  | 97.5  | 98.2  | 100.7 |
| R2 | RS2CL7884s | 36.19 | + | 613  | 2 | 611  | Rsa1.0_00697.1 | 67913  | 59554  | 61392  | 96.6  | 99.4  | 301.8 |
| R2 | RS2CL3734s | 36.37 | + | 648  | 3 | 648  | Rsa1.0_00473.1 | 212204 | 76081  | 76866  | 94.1  | 99.5  | 121.7 |
| R2 | Rs2CL1620s | 36.37 | - | 1198 | 2 | 1198 | Rsa1.0_00706.1 | 291570 | 229284 | 231346 | 98.3  | 99.8  | 172.4 |
| R2 | RS2CL5841s | 36.66 | - | 1115 | 3 | 1115 | Rsa1.0_03138.1 | 25092  | 9098   | 10683  | 98.7  | 99.7  | 142.5 |
| R2 | RS2CL1379s | 37.03 | + | 745  | 2 | 744  | Rsa1.0_00706.1 | 291570 | 159073 | 160169 | 97.6  | 99.6  | 147.7 |
| R2 | RSS1500    | 37.3  | - | 834  | 0 | 834  | Rsa1.0_00706.1 | 291570 | 7623   | 8460   | 85.6  | 100.0 | 100.4 |
| R2 | RSS4012    | 37.3  | - | 835  | 0 | 835  | Rsa1.0_00706.1 | 291570 | 32116  | 33245  | 97.1  | 100.0 | 135.2 |
| R2 | RSS3707    | 37.6  | - | 877  | 0 | 877  | Rsa1.0_00115.1 | 131321 | 110663 | 111541 | 100.0 | 100.0 | 100.1 |
| R2 | RSS0715    | 37.7  | + | 745  | 4 | 745  | Rsa1.0_00108.1 | 478491 | 458858 | 459708 | 99.5  | 99.5  | 114.7 |
| R2 | RSS1692    | 37.7  | - | 880  | 0 | 880  | Rsa1.0_02329.1 | 32474  | 9694   | 10996  | 98.8  | 100.0 | 148.0 |
| R2 | RSS2367    | 38.7  | + | 855  | 0 | 855  | Rsa1.0_00108.1 | 478491 | 9476   | 11627  | 94.2  | 100.0 | 251.6 |
| R2 | RSS3086    | 38.7  | + | 881  | 1 | 881  | Rsa1.0_00108.1 | 478491 | 36389  | 38860  | 99.1  | 99.9  | 280.8 |
| R2 | RS2CL1253s | 39.05 | - | 1032 | 0 | 1030 | Rsa1.0_00706.1 | 291570 | 58067  | 60014  | 99.4  | 99.8  | 189.0 |
| R2 | RS2CL7301s | 39.34 | - | 816  | 0 | 816  | Rsa1.0_00706.1 | 291570 | 23305  | 24200  | 96.9  | 100.0 | 109.7 |
| R2 | RGC12272c  | 39.68 | - | 480  | 0 | 480  | Rsa1.0_00108.1 | 478491 | 407111 | 407591 | 100.0 | 100.0 | 100.0 |
| R2 | RGC18651c  | 39.68 | + | 421  | 0 | 421  | Rsa1.0_00473.1 | 212204 | 200373 | 200794 | 100.0 | 100.0 | 100.0 |
| R2 | RGC4643c   | 39.68 | + | 399  | 0 | 399  | Rsa1.0_00108.1 | 478491 | 466397 | 466796 | 100.0 | 100.0 | 100.0 |
| R2 | RS2CL8395s | 39.86 | - | 837  | 1 | 837  | Rsa1.0_00115.1 | 131321 | 73166  | 74397  | 98.7  | 99.9  | 147.3 |
| R2 | RS2CL3283s | 40.08 | + | 1158 | 0 | 1156 | Rsa1.0_00108.1 | 478491 | 90484  | 92227  | 96.7  | 99.8  | 150.8 |
| R2 | RS2CL5011s | 40.59 | + | 833  | 1 | 832  | Rsa1.0_00108.1 | 478491 | 39781  | 41051  | 95.2  | 99.8  | 152.8 |
| R2 | RSS2368    | 40.62 | + | 653  | 0 | 653  | Rsa1.0_00033.1 | 515811 | 149172 | 150441 | 100.0 | 100.0 | 194.3 |
| R2 | RSS3742    | 40.62 | - | 478  | 3 | 478  | Rsa1.0_02976.1 | 26315  | 18529  | 19043  | 89.5  | 99.4  | 108.2 |
| R2 | RSS3354    | 40.72 | + | 439  | 9 | 318  |                | 316976 | 204963 | 205281 | 66.3  | 70.4  | 102.9 |
| R2 | RGA106s    | 40.91 |   |      |   |      |                |        |        |        |       |       |       |
| R2 | RS2CL5071s | 41.08 | + | 1018 | 3 | 1018 | Rsa1.0_00107.1 | 431659 | 280742 | 281857 | 98.8  | 99.7  | 109.9 |
| R2 | RS2CL942s  | 41.4  | - | 638  | 3 | 637  |                | 167018 | 79406  | 80502  | 95.6  | 99.4  | 172.9 |
| R2 | RSS0590    | 41.62 | + | 466  | 0 | 466  | Rsa1.0_00033.1 | 515811 | 474675 | 475135 | 98.7  | 100.0 | 98.7  |
| R2 | RS2CL7475s | 42.8  | - | 816  | 1 | 816  |                | 316976 | 41738  | 42844  | 98.2  | 99.9  | 135.7 |
| R2 | RSS1031    | 42.81 | + | 694  | 0 | 694  | Rsa1.0_01170.1 | 161131 | 130481 | 131738 | 99.6  | 100.0 | 181.1 |
| R2 | RS2CL2108s | 43.74 | + | 1479 | 1 | 1479 | Rsa1.0_00235.1 | 154696 | 99382  | 102037 | 99.9  | 99.9  | 179.6 |
| R2 | RGB13975c  | 44.12 | + | 532  | 0 | 532  | Rsa1.0_00108.1 | 478491 | 95215  | 95747  | 100.0 | 100.0 | 100.0 |

|    |            |       |   |      |    |      |                |        |        |        |       |       |       |
|----|------------|-------|---|------|----|------|----------------|--------|--------|--------|-------|-------|-------|
| R2 | RSS0156    | 44.14 |   |      |    |      |                |        |        |        |       |       |       |
| R2 | RS2CL4957s | 44.62 | + | 1119 | 3  | 1119 | Rsa1.0_03593.1 | 21869  | 1676   | 3014   | 93.1  | 99.7  | 119.9 |
| R2 | RS2CL1710s | 45.89 | + | 894  | 0  | 892  | Rsa1.0_00033.1 | 515811 | 485073 | 486356 | 87.7  | 99.8  | 143.8 |
| R2 | CA43       | 46.15 |   |      |    |      |                |        |        |        |       |       |       |
| R2 | RS2CL2938s | 46.32 | - | 1006 | 5  | 997  | Rsa1.0_00240.1 | 104175 | 14152  | 15595  | 96.5  | 98.6  | 145.5 |
| R2 | RG11533c   | 46.75 | - | 413  | 0  | 413  |                | 316976 | 122851 | 123264 | 100.0 | 100.0 | 100.0 |
| R2 | RG15219c   | 46.75 | + | 511  | 0  | 511  | Rsa1.0_00326.1 | 171955 | 26116  | 26627  | 100.0 | 100.0 | 100.0 |
| R2 | RG17035c   | 46.75 | - | 450  | 0  | 450  | Rsa1.0_03593.1 | 21869  | 12766  | 13216  | 54.0  | 100.0 | 100.0 |
| R2 | RGB966c    | 46.75 | - | 450  | 0  | 450  | Rsa1.0_00077.1 | 145005 | 122150 | 122600 | 100.0 | 100.0 | 100.0 |
| R2 | S582       | 46.95 |   |      |    |      |                |        |        |        |       |       |       |
| R2 | RG16477c   | 47.53 | + | 433  | 0  | 433  | Rsa1.0_00107.1 | 431659 | 9970   | 10403  | 99.8  | 100.0 | 100.0 |
| R2 | Rs2CL2264s | 48.06 | + | 774  | 0  | 774  | Rsa1.0_00033.1 | 515811 | 481294 | 482563 | 98.8  | 100.0 | 164.0 |
| R2 | RS2CL5524s | 48.33 | - | 1060 | 2  | 1060 | Rsa1.0_00033.1 | 515811 | 485084 | 486330 | 88.2  | 99.8  | 117.8 |
| R2 | RG122331c  | 49.21 | - | 482  | 0  | 482  | Rsa1.0_01937.1 | 37147  | 19723  | 20223  | 93.2  | 100.0 | 103.7 |
| R2 | RS2CL2407s | 49.8  | + | 1040 | 11 | 1040 | Rsa1.0_03688.1 | 143676 | 3786   | 5499   | 43.1  | 98.9  | 166.5 |
| R2 | RG127211c  | 50.63 | + | 405  | 0  | 405  | Rsa1.0_00033.1 | 515811 | 389278 | 389683 | 100.0 | 100.0 | 100.0 |
| R2 | RG14684c   | 51.43 | - | 412  | 0  | 412  | Rsa1.0_00775.1 | 64793  | 12236  | 12648  | 94.4  | 100.0 | 100.0 |
| R2 | RG14244c   | 52.4  | + | 508  | 0  | 508  |                | 167018 | 67562  | 68070  | 98.2  | 100.0 | 100.0 |
| R2 | RS2CL9061s | 53.2  | + | 1078 | 0  | 1078 |                | 21706  | 11078  | 12631  | 98.6  | 100.0 | 144.1 |
| R2 | RS2CL5137s | 53.59 | - | 790  | 6  | 785  |                | 21706  | 15728  | 16631  | 97.6  | 98.6  | 115.9 |
| R2 | CC29       | 54.54 |   |      |    |      |                |        |        |        |       |       |       |
| R2 | RS2CL868s  | 54.62 | - | 621  | 2  | 621  | Rsa1.0_01786.1 | 133324 | 101113 | 102300 | 98.6  | 99.7  | 191.8 |
| R2 | RGB500c    | 55.34 | - | 450  | 0  | 450  | Rsa1.0_00301.1 | 365315 | 180769 | 181219 | 100.0 | 100.0 | 100.0 |
| R2 | RG11836c   | 55.7  | + | 462  | 0  | 462  |                | 120234 | 118164 | 118626 | 100.0 | 100.0 | 100.0 |
| R2 | RS2CL2432s | 56.46 | + | 1262 | 9  | 1250 | Rsa1.0_00893.1 | 60626  | 43002  | 44863  | 94.4  | 98.3  | 150.0 |
| R2 | RGB1399c   | 57.19 | + | 451  | 0  | 451  | Rsa1.0_01786.1 | 133324 | 105722 | 106197 | 98.2  | 100.0 | 105.3 |
| R2 | RS2CL7359s | 57.82 | - | 930  | 1  | 839  | Rsa1.0_00082.1 | 237584 | 19675  | 20877  | 88.4  | 90.1  | 143.4 |
| R2 | RS2CL5452s | 58.64 | - | 390  | 2  | 390  |                | 69858  | 9751   | 10140  | 98.7  | 99.5  | 100.3 |
| R2 | RS2CL1869s | 58.94 | + | 810  | 0  | 810  |                | 69858  | 7722   | 8874   | 72.2  | 100.0 | 142.2 |
| R2 | RG19493c   | 59.59 |   |      |    |      |                |        |        |        |       |       |       |
| R2 | CC98bH     | 60.48 |   |      |    |      |                |        |        |        |       |       |       |
| R2 | RG123821c  | 62.48 | + | 440  | 0  | 440  | Rsa1.0_02208.1 | 33875  | 9188   | 9628   | 100.0 | 100.0 | 100.0 |
| R2 | RG11979c   | 63.35 | - | 416  | 0  | 416  | Rsa1.0_00893.1 | 60626  | 8440   | 8856   | 100.0 | 100.0 | 100.0 |
| R2 | RS2CL2645s | 64.21 | - | 1044 | 1  | 1044 | Rsa1.0_02122.1 | 34797  | 22599  | 23872  | 89.0  | 99.9  | 122.1 |
| R2 | RS2CL4947s | 64.26 | - | 753  | 0  | 753  | Rsa1.0_00303.1 | 97468  | 9423   | 10260  | 96.2  | 100.0 | 111.2 |
| R2 | RS2CL2123s | 65.65 | + | 816  | 2  | 809  | Rsa1.0_01513.1 | 44234  | 28411  | 29591  | 72.2  | 98.9  | 146.2 |

|    |            |       |   |      |    |      |                |        |        |        |       |       |       |
|----|------------|-------|---|------|----|------|----------------|--------|--------|--------|-------|-------|-------|
| R2 | RGC1333c   | 66.38 | + | 403  | 0  | 403  | Rsa1.0_04578.1 | 16774  | 4097   | 4500   | 100.0 | 100.0 | 100.0 |
| R2 | STG2F12    | 67.38 |   |      |    |      |                |        |        |        |       |       |       |
| R2 | RGC1167c   | 67.88 | + | 400  | 0  | 400  | Rsa1.0_00164.1 | 116642 | 77199  | 77599  | 80.5  | 100.0 | 100.0 |
| R2 | RGC7750c   | 67.88 | - | 450  | 0  | 450  | Rsa1.0_00226.1 | 105884 | 81235  | 81685  | 100.0 | 100.0 | 100.0 |
| R2 | RGB9670c   | 67.88 | + | 425  | 0  | 425  | Rsa1.0_00226.1 | 105884 | 42013  | 42438  | 100.0 | 100.0 | 100.0 |
| R2 | RGC13599c  | 69.68 | - | 514  | 0  | 503  | Rsa1.0_01611.1 | 42269  | 13865  | 14368  | 97.9  | 97.9  | 100.0 |
| R2 | RS2CL5848s | 70.53 | - | 781  | 21 | 780  | Rsa1.0_00428.1 | 85599  | 30765  | 31616  | 91.7  | 97.2  | 112.1 |
| R2 | RGC11438c  | 71.44 | - | 403  | 88 | 403  | Rsa1.0_00026.1 | 327835 | 55259  | 55574  | 78.2  | 78.2  | 100.0 |
| R2 | RS2CL2713s | 72.33 | + | 795  | 3  | 795  | Rsa1.0_00026.1 | 327835 | 45483  | 46269  | 96.0  | 99.6  | 99.2  |
| R2 | RGC13134c  | 73.11 |   |      |    |      |                |        |        |        |       |       |       |
| R2 | RGC820c    | 73.71 | + | 447  | 0  | 447  |                | 300828 | 290937 | 291384 | 100.0 | 100.0 | 100.0 |
| R2 | RS2CL5541s | 74.31 | + | 1160 | 2  | 1160 |                | 188018 | 83976  | 85777  | 85.6  | 99.8  | 155.5 |
| R2 | RS2CL4123s | 74.58 | - | 704  | 2  | 704  | Rsa1.0_02786.1 | 27880  | 18736  | 20242  | 92.9  | 99.7  | 214.5 |
| R2 | RGC5945c   | 74.85 |   |      |    |      |                |        |        |        |       |       |       |
| R2 | RGC22105c  | 75.04 |   |      |    |      |                |        |        |        |       |       |       |
| R2 | RGA1974s   | 75.6  |   |      |    |      |                |        |        |        |       |       |       |
| R2 | RS2CL5783s | 75.94 |   |      |    |      |                |        |        |        |       |       |       |
| R2 | RS2CL4762s | 76.11 | - | 1148 | 1  | 1148 |                | 188018 | 4637   | 7189   | 93.3  | 99.9  | 222.5 |
| R2 | RS2CL5589s | 76.67 | - | 723  | 0  | 723  | Rsa1.0_00877.1 | 61305  | 14387  | 15621  | 98.8  | 100.0 | 170.7 |
| R2 | RS2CL3263s | 77.93 | + | 861  | 4  | 861  |                | 300828 | 15426  | 16566  | 98.6  | 99.5  | 133.0 |
| R2 | RSS1758_a  | 78.06 | - | 785  | 0  | 761  |                | 68971  | 65835  | 67193  | 60.0  | 96.9  | 178.5 |
| R2 | RS2CL3772s | 78.07 | - | 782  | 2  | 782  | Rsa1.0_02114.1 | 34873  | 3164   | 4483   | 97.6  | 99.7  | 169.1 |
| R2 | RS2CL4384s | 79.33 | - | 854  | 21 | 854  | Rsa1.0_11462.1 | 5500   | 2311   | 3152   | 92.5  | 97.5  | 101.0 |
| R2 | OPT04H     | 80.88 |   |      |    |      |                |        |        |        |       |       |       |
| R2 | RSS1614    | 81.58 | + | 595  | 0  | 595  | Rsa1.0_03605.1 | 21827  | 11207  | 11805  | 100.0 | 100.0 | 100.5 |
| R2 | RSS1076    | 82.28 | - | 878  | 0  | 878  | Rsa1.0_03736.1 | 21081  | 11746  | 12868  | 91.5  | 100.0 | 127.8 |
| R2 | RSS1341    | 82.68 | - | 751  | 0  | 751  | Rsa1.0_01086.1 | 54509  | 36477  | 37222  | 96.4  | 100.0 | 99.2  |
| R2 | RSS2394    | 82.78 | - | 440  | 0  | 440  | Rsa1.0_03736.1 | 21081  | 12428  | 12868  | 83.2  | 100.0 | 100.0 |
| R2 | RS2CL7538s | 83.28 | - | 1023 | 6  | 1022 | Rsa1.0_01194.1 | 51113  | 26555  | 28294  | 95.3  | 99.3  | 171.2 |
| R2 | RSS0119    | 83.98 | + | 851  | 0  | 851  | Rsa1.0_00673.1 | 69325  | 46905  | 48060  | 96.5  | 100.0 | 135.7 |
| R2 | CA87aH     | 85.68 |   |      |    |      |                |        |        |        |       |       |       |
| R2 | RSS2308    | 86.78 | - | 776  | 0  | 776  |                | 325650 | 246462 | 247408 | 79.1  | 100.0 | 121.9 |
| R2 | RS2CL3410s | 89.36 | - | 714  | 1  | 714  | Rsa1.0_01611.1 | 42269  | 4116   | 4822   | 92.6  | 99.9  | 99.0  |
| R2 | RS2CL2004s | 89.93 | - | 684  | 0  | 684  | Rsa1.0_00355.1 | 92038  | 77883  | 78949  | 45.5  | 100.0 | 155.9 |
| R2 | RS2CL1934s | 90.29 | - | 1174 | 0  | 1174 | Rsa1.0_04238.1 | 18352  | 425    | 3036   | 97.2  | 100.0 | 222.4 |
| R2 | RGC10518c  | 90.47 | + | 547  | 0  | 547  |                | 66155  | 5725   | 6272   | 99.6  | 100.0 | 100.0 |

|    |            |        |   |      |    |      |                |        |        |        |       |       |       |
|----|------------|--------|---|------|----|------|----------------|--------|--------|--------|-------|-------|-------|
| R2 | RS2CL5545s | 90.94  | + | 1123 | 1  | 1123 | Rsa1.0_02430.1 | 31506  | 25170  | 26522  | 97.9  | 99.9  | 120.5 |
| R2 | RSS3936    | 91.67  | + | 676  | 0  | 676  | Rsa1.0_02954.1 | 26485  | 16509  | 17185  | 98.1  | 100.0 | 100.0 |
| R2 | RS2CL3191s | 91.85  | + | 1051 | 4  | 1051 | Rsa1.0_01750.1 | 39816  | 28173  | 29221  | 93.5  | 99.6  | 100.1 |
| R2 | RGC3758c   | 92.25  | - | 497  | 0  | 497  | Rsa1.0_01060.1 | 55368  | 37197  | 37694  | 95.4  | 100.0 | 100.0 |
| R2 | RGC10400c  | 92.64  | + | 410  | 0  | 410  | Rsa1.0_00062.1 | 299291 | 261730 | 262140 | 100.0 | 100.0 | 100.0 |
| R2 | RS2CL3650s | 93.11  | - | 1187 | 2  | 1180 | Rsa1.0_00550.1 | 210790 | 177712 | 179518 | 96.3  | 99.2  | 153.3 |
| R2 | RS2CL2542s | 93.48  | - | 1046 | 10 | 1044 | Rsa1.0_01876.1 | 37800  | 6988   | 9746   | 97.1  | 98.9  | 266.7 |
| R2 | CB93       | 93.64  |   |      |    |      |                |        |        |        |       |       |       |
| R2 | CC45b      | 95.5   |   |      |    |      |                |        |        |        |       |       |       |
| R2 | RS2CL6642s | 95.63  | + | 717  | 0  | 717  | Rsa1.0_01021.1 | 56610  | 38695  | 39412  | 99.4  | 100.0 | 100.0 |
| R2 | CD72aH     | 96.43  |   |      |    |      |                |        |        |        |       |       |       |
| R2 | OPT12b     | 97.63  |   |      |    |      |                |        |        |        |       |       |       |
| R2 | CA68       | 98.73  |   |      |    |      |                |        |        |        |       |       |       |
| R2 | RS2CL6884s | 98.86  | - | 861  | 1  | 776  | Rsa1.0_06645.1 | 10607  | 7569   | 8468   | 89.4  | 90.0  | 116.0 |
| R2 | CO-2       | 99.2   |   |      |    |      |                |        |        |        |       |       |       |
| R2 | RGB1253c   | 99.55  |   |      |    |      |                |        |        |        |       |       |       |
| R2 | OPE10      | 99.57  |   |      |    |      |                |        |        |        |       |       |       |
| R2 | OPK06      | 99.87  |   |      |    |      |                |        |        |        |       |       |       |
| R2 | CB56       | 99.97  |   |      |    |      |                |        |        |        |       |       |       |
| R2 | CC42a      | 100.37 |   |      |    |      |                |        |        |        |       |       |       |
| R2 | RGC2431c   | 100.78 | + | 442  | 0  | 442  | Rsa1.0_00633.1 | 71250  | 4898   | 5340   | 100.0 | 100.0 | 100.0 |
| R2 | RSS2455    | 101.41 | - | 880  | 0  | 880  | Rsa1.0_01587.1 | 42789  | 29604  | 31315  | 99.1  | 100.0 | 194.4 |
| R2 | RGC4812c   | 101.88 | - | 475  | 0  | 475  | Rsa1.0_00230.1 | 105389 | 26549  | 27024  | 100.0 | 100.0 | 100.0 |
| R2 | RSS1140    | 101.97 | + | 792  | 0  | 792  | Rsa1.0_01984.1 | 36491  | 31605  | 32396  | 97.7  | 100.0 | 99.9  |
| R2 | RS2CL1225s | 102.08 | + | 853  | 0  | 853  | Rsa1.0_00677.1 | 69159  | 45110  | 45967  | 99.7  | 100.0 | 100.5 |
| R2 | RSS2316    | 102.43 | - | 865  | 0  | 865  | Rsa1.0_03280.1 | 145083 | 1610   | 2866   | 99.3  | 100.0 | 145.2 |
| R2 | RSS2594    | 102.73 | + | 909  | 0  | 909  | Rsa1.0_05782.1 | 12646  | 7692   | 9403   | 99.2  | 100.0 | 188.2 |
| R2 | RSS1635    | 102.83 |   |      |    |      |                |        |        |        |       |       |       |
| R2 | RSS3530_a  | 102.83 | + | 496  | 2  | 468  | Rsa1.0_02302.1 | 32823  | 14157  | 14764  | 81.7  | 94.0  | 130.3 |
| R2 | RSS3934    | 102.83 | - | 870  | 0  | 870  | Rsa1.0_05498.1 | 13523  | 2593   | 4394   | 99.5  | 100.0 | 207.0 |
| R2 | RS2CL4062s | 103.51 | - | 688  | 0  | 687  | Rsa1.0_01407.1 | 46425  | 16859  | 17632  | 97.1  | 99.9  | 112.5 |
| R2 | CC62       | 104.33 |   |      |    |      |                |        |        |        |       |       |       |
| R2 | RSS2572    | 105.33 | - | 848  | 0  | 848  | Rsa1.0_01103.1 | 53974  | 16628  | 17986  | 97.8  | 100.0 | 160.1 |
| R2 | RSS0373    | 105.53 | + | 640  | 10 | 568  | Rsa1.0_03568.1 | 22048  | 18038  | 18585  | 83.8  | 87.2  | 98.0  |
| R2 | RSS2081    | 106.43 | - | 884  | 0  | 884  | Rsa1.0_01099.1 | 158481 | 44486  | 45249  | 76.1  | 100.0 | 86.3  |
| R2 | RSS0968    | 109.13 | + | 832  | 0  | 832  | Rsa1.0_00855.1 | 62047  | 15779  | 17725  | 94.8  | 100.0 | 233.9 |



|    |            |        |   |      |     |      |                |        |        |        |       |       |       |
|----|------------|--------|---|------|-----|------|----------------|--------|--------|--------|-------|-------|-------|
| R2 | RGC11673c  | 111.59 | + | 555  | 208 | 466  | Rsa1.0_00633.1 | 71250  | 46185  | 46443  | 32.1  | 46.5  | 100.0 |
| R2 | CB82H      | 111.74 |   |      |     |      |                |        |        |        |       |       |       |
| R2 | RS2CL7828s | 111.76 | + | 1066 | 8   | 1066 | Rsa1.0_00147.1 | 249503 | 129148 | 131231 | 96.6  | 99.3  | 196.9 |
| R2 | RS2CL3640s | 112.16 | + | 1095 | 7   | 1093 | Rsa1.0_00147.1 | 249503 | 155765 | 157314 | 96.4  | 99.2  | 142.6 |
| R2 | RSS2889    | 112.19 | - | 849  | 0   | 849  | Rsa1.0_03232.1 | 24450  | 8717   | 10144  | 100.0 | 100.0 | 168.1 |
| R2 | RS2CL3017s | 112.82 | + | 1395 | 2   | 1395 | Rsa1.0_02290.1 | 32971  | 21743  | 23967  | 99.1  | 99.9  | 159.7 |
| R2 | RSS2721    | 112.83 | + | 835  | 30  | 834  | Rsa1.0_00877.1 | 61305  | 40806  | 41610  | 77.4  | 96.3  | 100.0 |
| R2 | OPT16b     | 114.33 |   |      |     |      |                |        |        |        |       |       |       |
| R2 | RS2CL4126s | 114.34 | + | 1195 | 6   | 1195 | Rsa1.0_02735.1 | 28344  | 2744   | 4215   | 94.1  | 99.5  | 123.7 |
| R2 | RGA1566s   | 115.56 |   |      |     |      |                |        |        |        |       |       |       |
| R2 | Rs2CL2368s | 116.12 | - | 1182 | 0   | 1181 | Rsa1.0_05573.1 | 13290  | 2917   | 4696   | 98.0  | 99.9  | 150.6 |
| R2 | RSS1798    | 116.12 | - | 908  | 0   | 842  | Rsa1.0_03087.1 | 25478  | 21512  | 22388  | 79.6  | 92.7  | 104.0 |
| R2 | RGC3637c   | 116.43 | - | 406  | 75  | 406  | Rsa1.0_01095.1 | 54276  | 24217  | 24548  | 48.5  | 81.5  | 100.0 |
| R2 | CA39       | 117.35 |   |      |     |      |                |        |        |        |       |       |       |
| R2 | RGA154s    | 117.59 |   |      |     |      |                |        |        |        |       |       |       |
| R2 | RGC18172c  | 118.6  | + | 477  | 0   | 477  | Rsa1.0_06373.1 | 11138  | 6368   | 6845   | 100.0 | 100.0 | 100.0 |
| R2 | RSS2958    | 118.61 | - | 827  | 1   | 827  | Rsa1.0_01064.1 | 55295  | 51314  | 52510  | 96.9  | 99.9  | 144.8 |
| R2 | RS2CL3903s | 118.85 | - | 1114 | 2   | 1114 | Rsa1.0_05878.1 | 12344  | 8156   | 9924   | 96.1  | 99.8  | 159.0 |
| R2 | RS2CL836s  | 119.25 | + | 758  | 0   | 753  | Rsa1.0_00594.1 | 73729  | 29256  | 30313  | 96.3  | 99.3  | 140.4 |
| R2 | RGC13420c  | 120    |   |      |     |      |                |        |        |        |       |       |       |
| R2 | RS2CL4187s | 120.34 | + | 1684 | 0   | 1682 | Rsa1.0_05593.1 | 13235  | 442    | 3208   | 98.5  | 99.9  | 164.5 |
| R2 | RGB10737c  | 120.78 | + | 600  | 0   | 600  | Rsa1.0_01047.1 | 55705  | 39513  | 40113  | 100.0 | 100.0 | 100.0 |
| R2 | RGC11938c  | 120.78 | + | 538  | 0   | 538  | Rsa1.0_01576.1 | 42923  | 26736  | 27274  | 100.0 | 100.0 | 100.0 |
| R2 | RSS3138    | 120.86 | - | 835  | 2   | 835  | Rsa1.0_00375.1 | 90207  | 65073  | 66803  | 99.6  | 99.8  | 207.7 |
| R2 | RS2CL6395s | 122.3  | - | 782  | 0   | 782  | Rsa1.0_00004.1 | 253996 | 197687 | 198804 | 99.1  | 100.0 | 142.8 |
| R2 | RS2CL3405s | 122.76 | - | 1180 | 0   | 1180 | Rsa1.0_01030.1 | 56290  | 38433  | 41014  | 98.1  | 100.0 | 218.7 |
| R2 | RGC13684c  | 123.32 | - | 514  | 0   | 514  | Rsa1.0_02108.1 | 163029 | 155330 | 155844 | 100.0 | 100.0 | 100.0 |
| R2 | RSS3268    | 123.53 | - | 804  | 0   | 804  | Rsa1.0_00829.1 | 158305 | 29183  | 29986  | 98.4  | 100.0 | 99.9  |
| R2 | RGC2676c   | 123.61 | - | 401  | 0   | 401  | Rsa1.0_01471.1 | 45101  | 26170  | 26571  | 90.0  | 100.0 | 100.0 |
| R2 | RGC7958c   | 124.04 | + | 496  | 0   | 496  | Rsa1.0_01826.1 | 38700  | 22280  | 22776  | 69.6  | 100.0 | 100.0 |
| R2 | RS2CL5422s | 124.16 | + | 639  | 0   | 638  | Rsa1.0_00829.1 | 158305 | 101486 | 102629 | 96.1  | 99.8  | 179.2 |
| R2 | RS2CL3768s | 124.53 | + | 1207 | 2   | 1207 | Rsa1.0_02108.1 | 163029 | 152693 | 154723 | 99.6  | 99.8  | 168.5 |
| R2 | RGC9765c   | 124.71 | - | 544  | 0   | 544  | Rsa1.0_03267.1 | 24230  | 18534  | 19078  | 100.0 | 100.0 | 100.0 |
| R2 | RS2CL2980s | 125.34 | + | 1140 | 2   | 1128 | Rsa1.0_02178.1 | 156197 | 148496 | 151019 | 95.3  | 98.8  | 224.1 |
| R2 | RSS1262    | 125.5  | + | 444  | 0   | 442  | Rsa1.0_03781.1 | 20891  | 11682  | 12145  | 96.2  | 99.6  | 104.8 |
| R2 | RGB716c    | 126.74 | - | 406  | 0   | 406  | Rsa1.0_04034.1 | 19481  | 18803  | 19209  | 100.0 | 100.0 | 100.0 |

|    |            |        |   |      |     |      |                |        |        |        |       |       |       |
|----|------------|--------|---|------|-----|------|----------------|--------|--------|--------|-------|-------|-------|
| R2 | RS2CL6075s | 127.94 | + | 904  | 342 | 904  | Rsa1.0_00257.1 | 102407 | 97009  | 97572  | 61.2  | 62.2  | 100.2 |
| R2 | RGC1792c   | 129.51 | + | 523  | 0   | 523  | Rsa1.0_01855.1 | 38204  | 18598  | 19121  | 100.0 | 100.0 | 100.0 |
| R2 | CD87b      | 129.91 |   |      |     |      |                |        |        |        |       |       |       |
| R2 | RS2CL4370s | 130.56 |   |      |     |      |                |        |        |        |       |       |       |
| R2 | RGC15769c  | 130.68 | + | 493  | 0   | 493  | Rsa1.0_01351.1 | 47498  | 19413  | 19906  | 100.0 | 100.0 | 100.0 |
| R2 | RGC6336c   | 130.71 | + | 456  | 0   | 420  | Rsa1.0_00063.1 | 156150 | 27311  | 27731  | 82.5  | 92.1  | 100.0 |
| R2 | RGC1718c   | 131.61 | - | 439  | 0   | 439  | Rsa1.0_03513.1 | 22349  | 14138  | 14577  | 100.0 | 100.0 | 100.0 |
| R2 | CA95b      | 132.47 |   |      |     |      |                |        |        |        |       |       |       |
| R2 | RS2CL2371s | 132.51 | + | 1103 | 2   | 1103 | Rsa1.0_03570.1 | 22040  | 8485   | 9875   | 97.6  | 99.8  | 126.3 |
| R2 | RGA1718s   | 132.9  |   |      |     |      |                |        |        |        |       |       |       |
| R2 | RGC2467c   | 133.04 | + | 427  | 0   | 427  | Rsa1.0_02159.1 | 34471  | 30172  | 30599  | 100.0 | 100.0 | 100.0 |
| R2 | RSS0477    | 133.16 | - | 748  | 0   | 748  | Rsa1.0_09160.1 | 6599   | 576    | 1741   | 91.4  | 100.0 | 155.8 |
| R2 | RS2CL867s  | 133.81 | + | 1225 | 28  | 1120 |                | 368722 | 278550 | 280555 | 78.5  | 89.1  | 183.6 |
| R2 | RSS1885    | 134.86 | - | 858  | 1   | 858  | Rsa1.0_04337.1 | 17845  | 10013  | 11235  | 99.9  | 99.9  | 142.6 |
| R2 | RS2CL4248s | 134.95 | + | 653  | 2   | 653  | Rsa1.0_00365.1 | 90902  | 80844  | 82092  | 99.1  | 99.7  | 191.7 |
| R2 | RGC15951c  | 135.1  | - | 448  | 0   | 448  | Rsa1.0_00343.1 | 93570  | 87740  | 88188  | 100.0 | 100.0 | 100.0 |
| R2 | RGC6949c   | 135.1  | - | 524  | 0   | 524  | Rsa1.0_00343.1 | 93570  | 41236  | 41760  | 100.0 | 100.0 | 100.0 |
| R2 | RS2CL2716s | 135.95 | - | 974  | 2   | 957  | Rsa1.0_00343.1 | 93570  | 88602  | 90103  | 92.4  | 98.1  | 157.2 |
| R2 | RGC12310c  | 136.55 | - | 404  | 0   | 404  | Rsa1.0_01004.1 | 56975  | 39815  | 40219  | 100.0 | 100.0 | 100.0 |
| R2 | RS2CL1046s | 137.05 | + | 726  | 3   | 718  | Rsa1.0_05401.1 | 13876  | 542    | 1735   | 37.9  | 98.5  | 166.9 |
| R2 | RSS0822    | 137.36 | - | 797  | 0   | 797  | Rsa1.0_00687.1 | 68494  | 2707   | 4333   | 99.9  | 100.0 | 204.0 |
| R2 | Rs2CL2604s | 137.46 |   |      |     |      |                |        |        |        |       |       |       |
| R2 | RGC15477c  | 138.39 | - | 462  | 0   | 462  | Rsa1.0_01637.1 | 41862  | 40568  | 41030  | 100.0 | 100.0 | 100.0 |
| R2 | RS2CL3703s | 139.86 | - | 1189 | 2   | 1189 | Rsa1.0_00969.1 | 58014  | 21460  | 23158  | 93.1  | 99.8  | 143.1 |
| R2 | RGB5639c   | 142.35 | - | 448  | 0   | 448  | Rsa1.0_00230.1 | 105389 | 73130  | 73578  | 52.5  | 100.0 | 100.0 |
| R2 | RGC16522c  | 144.97 | - | 425  | 0   | 425  | Rsa1.0_04193.1 | 18571  | 10056  | 10481  | 100.0 | 100.0 | 100.0 |
| R2 | RGC16935c  | 146.66 |   |      |     |      |                |        |        |        |       |       |       |
| R3 | RS2CL3605s | 0      | - | 765  | 1   | 765  | Rsa1.0_00173.1 | 288743 | 84007  | 85294  | 76.6  | 99.9  | 168.5 |
| R3 | RSS1377    | 12.27  | + | 869  | 0   | 869  | Rsa1.0_03448.1 | 22844  | 12215  | 13084  | 96.8  | 100.0 | 100.0 |
| R3 | RGC21838c  | 12.38  | + | 481  | 0   | 481  | Rsa1.0_00192.1 | 278200 | 772    | 1253   | 100.0 | 100.0 | 100.0 |
| R3 | RGC6058c   | 13.93  | + | 547  | 0   | 547  | Rsa1.0_02663.1 | 169243 | 11068  | 11615  | 100.0 | 100.0 | 100.0 |
| R3 | RSS3168    | 14.17  |   |      |     |      |                |        |        |        |       |       |       |
| R3 | RS2CL683s  | 15.22  | + | 916  | 0   | 896  |                | 99966  | 12147  | 13568  | 87.6  | 97.8  | 158.6 |
| R3 | RS2CL3040s | 16.78  | + | 842  | 0   | 841  | Rsa1.0_01300.1 | 48942  | 33422  | 34835  | 97.5  | 99.9  | 168.0 |
| R3 | RS2CL6139s | 17.34  | - | 1303 | 5   | 1302 | Rsa1.0_00727.1 | 66724  | 50809  | 52418  | 92.3  | 99.5  | 124.1 |

|    |            |       |   |      |    |      |                |        |        |        |       |       |       |
|----|------------|-------|---|------|----|------|----------------|--------|--------|--------|-------|-------|-------|
| R3 | RS2CL3557s | 18.05 |   |      |    |      |                |        |        |        |       |       |       |
| R3 | RGC4640c   | 18.08 | - | 419  | 0  | 419  | Rsa1.0_00192.1 | 278200 | 248517 | 248936 | 93.3  | 100.0 | 100.0 |
| R3 | CA05b      | 18.37 |   |      |    |      |                |        |        |        |       |       |       |
| R3 | RS2CL1245s | 19.46 | - | 1226 | 0  | 1225 | Rsa1.0_00192.1 | 278200 | 224880 | 228241 | 98.9  | 99.9  | 274.4 |
| R3 | RGA93s     | 19.93 |   |      |    |      |                |        |        |        |       |       |       |
| R3 | RGC9028c   | 19.95 | - | 464  | 0  | 464  | Rsa1.0_01220.1 | 161775 | 17840  | 18303  | 99.4  | 100.0 | 99.8  |
| R3 | RSS0816    | 20.27 | - | 828  | 0  | 828  | Rsa1.0_00192.1 | 278200 | 98708  | 99992  | 97.6  | 100.0 | 155.1 |
| R3 | RGC3942c   | 20.67 | - | 481  | 0  | 481  | Rsa1.0_00661.1 | 213041 | 57093  | 57574  | 100.0 | 100.0 | 100.0 |
| R3 | RGA1553s   | 21.24 |   |      |    |      |                |        |        |        |       |       |       |
| R3 | RS2CL1424s | 22.26 | + | 1185 | 0  | 1184 | Rsa1.0_02884.1 | 27034  | 11429  | 13240  | 81.9  | 99.9  | 153.0 |
| R3 | RS2CL6686s | 22.71 | - | 726  | 5  | 710  | Rsa1.0_02356.1 | 141500 | 4993   | 5689   | 89.9  | 97.1  | 98.7  |
| R3 | RSS0486    | 23.17 | + | 574  | 0  | 574  | Rsa1.0_02879.1 | 27047  | 17843  | 18502  | 100.0 | 100.0 | 114.8 |
| R3 | RS2CL4186s | 23.23 | - | 947  | 2  | 946  | Rsa1.0_01310.1 | 164719 | 137111 | 139211 | 97.9  | 99.7  | 222.5 |
| R3 | RSS2764    | 23.37 | + | 794  | 0  | 794  | Rsa1.0_02750.1 | 28239  | 25623  | 26916  | 96.4  | 100.0 | 162.9 |
| R3 | RGC9371c   | 23.92 | - | 417  | 0  | 417  | Rsa1.0_02808.1 | 27677  | 23689  | 24106  | 99.3  | 100.0 | 100.0 |
| R3 | RS2CL6155s | 23.97 | - | 879  | 37 | 879  | Rsa1.0_16063.1 | 2301   | 780    | 2301   | 91.9  | 95.8  | 180.6 |
| R3 | Z46819     | 24.27 |   |      |    |      |                |        |        |        |       |       |       |
| R3 | RS2CL2845s | 24.88 | - | 1308 | 17 | 1308 | Rsa1.0_02903.1 | 26901  | 18651  | 20543  | 97.0  | 98.7  | 146.6 |
| R3 | RSS2403    | 25.17 | - | 762  | 10 | 762  | Rsa1.0_01310.1 | 164719 | 9836   | 10873  | 92.3  | 98.7  | 137.9 |
| R3 | RS2CL4457s | 25.37 | + | 885  | 4  | 882  | Rsa1.0_07000.1 | 10049  | 4934   | 6599   | 92.4  | 99.2  | 189.6 |
| R3 | RGC22415c  | 25.97 | - | 550  | 0  | 550  | Rsa1.0_02903.1 | 26901  | 7329   | 7879   | 100.0 | 100.0 | 100.0 |
| R3 | RGC3069c   | 25.97 | + | 406  | 0  | 406  | Rsa1.0_06803.1 | 10330  | 2860   | 3266   | 100.0 | 100.0 | 100.0 |
| R3 | RGC5894c   | 25.43 | - | 492  | 0  | 492  | Rsa1.0_03249.1 | 146254 | 4048   | 4540   | 100.0 | 100.0 | 100.0 |
| R3 | RGC5939c   | 25.43 | - | 415  | 0  | 415  | Rsa1.0_03302.1 | 23898  | 13929  | 14344  | 100.0 | 100.0 | 100.0 |
| R3 | RGB10851c  | 25.97 | + | 497  | 0  | 497  | Rsa1.0_03090.1 | 25464  | 14283  | 14822  | 68.2  | 100.0 | 108.5 |
| R3 | RSS2108    | 26.17 | + | 872  | 0  | 872  | Rsa1.0_07021.1 | 10016  | 6320   | 8332   | 99.0  | 100.0 | 230.7 |
| R3 | RSS2935    | 26.97 | - | 807  | 0  | 807  | Rsa1.0_06677.1 | 10560  | 5704   | 6511   | 83.4  | 100.0 | 100.0 |
| R3 | RS2CL4299s | 27.74 | + | 1305 | 12 | 1305 | Rsa1.0_04852.1 | 15712  | 8257   | 9860   | 90.0  | 99.1  | 124.0 |
| R3 | RSS0832    | 27.87 | - | 779  | 23 | 779  | Rsa1.0_04662.1 | 16477  | 144    | 899    | 93.6  | 97.1  | 99.9  |
| R3 | RS2CL6594s | 28.31 | + | 629  | 15 | 629  | Rsa1.0_06803.1 | 10330  | 4639   | 5258   | 73.9  | 97.6  | 100.8 |
| R3 | RGB8990c   | 29.16 | - | 455  | 0  | 455  |                | 78829  | 48930  | 49385  | 100.0 | 100.0 | 100.0 |
| R3 | RSS2634    | 29.67 |   |      |    |      |                |        |        |        |       |       |       |
| R3 | RGB12858c  | 29.83 | + | 462  | 0  | 397  | Rsa1.0_31666.1 | 722    | 325    | 722    | 85.7  | 85.9  | 100.0 |
| R3 | RSS1743    | 30.37 | - | 862  | 0  | 862  |                | 66155  | 52006  | 53429  | 71.9  | 100.0 | 165.1 |
| R3 | RSS2359    | 30.67 | - | 428  | 10 | 428  | Rsa1.0_04550.1 | 16893  | 828    | 1754   | 97.7  | 97.7  | 221.5 |
| R3 | RSS3002    | 30.67 | + | 864  | 59 | 864  | Rsa1.0_02268.1 | 33172  | 10444  | 11407  | 93.2  | 93.2  | 119.6 |

|    |            |       |   |      |     |      |                |        |        |        |       |       |       |
|----|------------|-------|---|------|-----|------|----------------|--------|--------|--------|-------|-------|-------|
| R3 | RSS3172    | 30.67 | - | 821  | 1   | 821  | Rsa1.0_05332.1 | 14123  | 7891   | 9155   | 81.4  | 99.9  | 154.2 |
| R3 | RSS1931    | 30.77 | - | 416  | 0   | 416  | Rsa1.0_40889.1 | 549    | 40     | 458    | 99.3  | 100.0 | 100.5 |
| R3 | RSS0692    | 31.37 | + | 805  | 1   | 805  | Rsa1.0_00728.1 | 66704  | 38874  | 40228  | 68.0  | 99.9  | 168.4 |
| R3 | RSS1117    | 31.37 | + | 822  | 0   | 822  |                | 294827 | 118102 | 119664 | 70.9  | 100.0 | 190.0 |
| R3 | RSS0789    | 32.17 | + | 713  | 0   | 713  | Rsa1.0_01731.1 | 40208  | 18230  | 19318  | 100.0 | 100.0 | 152.6 |
| R3 | RS2CL1360s | 32.23 | - | 871  | 2   | 871  | Rsa1.0_00883.1 | 61230  | 29865  | 31418  | 96.2  | 99.8  | 178.7 |
| R3 | RGC5762c   | 33    | + | 408  | 0   | 408  | Rsa1.0_00412.1 | 86935  | 47608  | 48016  | 100.0 | 100.0 | 100.0 |
| R3 | RSS1261    | 33.96 | - | 836  | 0   | 836  | Rsa1.0_08153.1 | 7828   | 5634   | 7003   | 96.4  | 100.0 | 163.8 |
| R3 | RSS0977    | 34.16 |   |      |     |      |                |        |        |        |       |       |       |
| R3 | Rs2CL2367s | 35.4  | + | 955  | 1   | 954  |                | 167185 | 32132  | 33858  | 93.9  | 99.8  | 181.1 |
| R3 | Rs2CL2374s | 36.41 | + | 704  | 9   | 702  | Rsa1.0_02099.1 | 35030  | 17741  | 18715  | 98.3  | 98.4  | 140.6 |
| R3 | RS2CL2369s | 36.41 | - | 1018 | 0   | 951  | Rsa1.0_03261.1 | 24281  | 10622  | 15566  | 77.3  | 93.4  | 519.9 |
| R3 | RS2CL6944s | 36.6  | + | 929  | 2   | 929  | Rsa1.0_04399.1 | 17543  | 11125  | 12581  | 97.0  | 99.8  | 157.1 |
| R3 | RS2CL1855s | 36.78 | - | 1347 | 2   | 1347 | Rsa1.0_03069.1 | 25615  | 17941  | 19872  | 49.3  | 99.9  | 143.6 |
| R3 | RGC662c    | 36.95 | + | 446  | 0   | 446  | Rsa1.0_02099.1 | 35030  | 5768   | 6214   | 98.9  | 100.0 | 100.0 |
| R3 | RSS2129    | 37.7  | - | 672  | 0   | 672  | Rsa1.0_00322.1 | 212233 | 65166  | 65839  | 100.0 | 100.0 | 100.2 |
| R3 | RGB5491c   | 39.04 | - | 464  | 0   | 464  | Rsa1.0_00090.1 | 273859 | 17347  | 18015  | 66.4  | 100.0 | 144.0 |
| R3 | CZ09       | 39.21 |   |      |     |      |                |        |        |        |       |       |       |
| R3 | RGC15408c  | 39.83 | - | 424  | 0   | 424  | Rsa1.0_00090.1 | 273859 | 173120 | 173544 | 100.0 | 100.0 | 100.0 |
| R3 | CA05a      | 40.92 |   |      |     |      |                |        |        |        |       |       |       |
| R3 | RGC11985c  | 41.21 | + | 420  | 0   | 420  | Rsa1.0_00090.1 | 273859 | 81593  | 82013  | 99.8  | 100.0 | 100.0 |
| R3 | RGC1838c   | 41.21 | + | 491  | 0   | 491  | Rsa1.0_04463.1 | 17247  | 9666   | 10157  | 100.0 | 100.0 | 100.0 |
| R3 | RGC2115c   | 41.21 | - | 398  | 0   | 398  | Rsa1.0_00090.1 | 273859 | 50908  | 51306  | 100.0 | 100.0 | 100.0 |
| R3 | RS2CL3966s | 41.97 | + | 1126 | 2   | 747  | Rsa1.0_01896.1 | 37512  | 4581   | 5561   | 17.0  | 66.2  | 131.5 |
| R3 | RS2CL812s  | 42.64 | - | 787  | 47  | 786  | Rsa1.0_01896.1 | 37512  | 35257  | 36969  | 93.0  | 93.9  | 231.7 |
| R3 | RSS3288    | 42.74 | + | 735  | 0   | 623  | Rsa1.0_02870.1 | 27102  | 11643  | 12612  | 77.4  | 84.8  | 155.5 |
| R3 | RGC2693c   | 42.9  | + | 423  | 0   | 423  | Rsa1.0_00695.1 | 68019  | 60931  | 61354  | 100.0 | 100.0 | 100.0 |
| R3 | RGC4050c   | 42.9  | - | 509  | 118 | 509  | Rsa1.0_00233.1 | 104918 | 88132  | 88523  | 76.8  | 76.8  | 100.0 |
| R3 | RGC4388c   | 43.29 | - | 451  | 221 | 451  | Rsa1.0_00828.1 | 62744  | 45935  | 46165  | 51.0  | 51.0  | 100.0 |
| R3 | RGC12111c  | 43.34 | + | 563  | 0   | 563  |                | 78829  | 22382  | 22945  | 100.0 | 100.0 | 100.0 |
| R3 | RGC7232c   | 43.5  | + | 493  | 0   | 493  | Rsa1.0_00207.1 | 248736 | 84044  | 84537  | 100.0 | 100.0 | 100.0 |
| R3 | RS2CL2195s | 43.62 | + | 467  | 2   | 467  | Rsa1.0_00207.1 | 248736 | 196514 | 196979 | 99.6  | 99.6  | 100.0 |
| R3 | RGC23188c  | 44.01 |   |      |     |      |                |        |        |        |       |       |       |
| R3 | RSS1540    | 44.56 | + | 794  | 315 | 794  | Rsa1.0_03261.1 | 24281  | 21086  | 21565  | 60.3  | 60.3  | 100.0 |
| R3 | RGC6897c   | 44.92 | + | 441  | 0   | 441  | Rsa1.0_00905.1 | 60110  | 31918  | 32359  | 100.0 | 100.0 | 100.0 |
| R3 | RS2CL5856s | 46.17 | + | 1120 | 1   | 1120 | Rsa1.0_00695.1 | 68019  | 48162  | 50570  | 97.3  | 99.9  | 215.2 |

|    |            |       |   |      |     |      |                |        |        |        |       |       |       |
|----|------------|-------|---|------|-----|------|----------------|--------|--------|--------|-------|-------|-------|
| R3 | RS2CL7274s | 47.01 | - | 926  | 78  | 926  | Rsa1.0_01570.1 | 43015  | 7257   | 8105   | 35.2  | 91.6  | 100.0 |
| R3 | CA05aN     | 47.4  |   |      |     |      |                |        |        |        |       |       |       |
| R3 | RS2CL7810s | 47.79 | + | 787  | 2   | 787  | Rsa1.0_00173.1 | 288743 | 60856  | 65214  | 80.6  | 99.8  | 555.2 |
| R3 | H36913     | 49.21 |   |      |     |      |                |        |        |        |       |       |       |
| R3 | RGC3691c   | 49.24 | + | 429  | 0   | 429  | Rsa1.0_01884.1 | 37659  | 21212  | 21641  | 99.8  | 100.0 | 100.0 |
| R3 | RS2CL1767s | 50.07 | - | 835  | 2   | 835  | Rsa1.0_01938.1 | 264018 | 156771 | 158134 | 96.8  | 99.8  | 163.6 |
| R3 | RGB2849c   | 51.25 | + | 409  | 0   | 409  | Rsa1.0_00173.1 | 288743 | 82248  | 82657  | 100.0 | 100.0 | 100.0 |
| R3 | ACGM18     | 51.95 |   |      |     |      |                |        |        |        |       |       |       |
| R3 | RS2CL1552s | 52.03 | - | 1458 | 1   | 1458 | Rsa1.0_01884.1 | 37659  | 17346  | 18837  | 93.8  | 99.9  | 102.3 |
| R3 | RSS2841    | 52.85 | - | 842  | 6   | 842  | Rsa1.0_04762.1 | 16101  | 4361   | 5197   | 96.7  | 99.3  | 100.0 |
| R3 | RS2CL1544s | 53.12 | - | 891  | 2   | 887  | Rsa1.0_01938.1 | 264018 | 159637 | 160700 | 94.6  | 99.3  | 120.1 |
| R3 | RSS2981    | 53.56 | - | 926  | 0   | 926  | Rsa1.0_08551.1 | 7210   | 781    | 1716   | 95.8  | 100.0 | 101.0 |
| R3 | RGC8225c   | 53.73 | + | 400  | 124 | 400  | Rsa1.0_03748.1 | 21035  | 17688  | 17964  | 69.0  | 69.0  | 100.0 |
| R3 | RSS2675    | 53.96 | - | 613  | 84  | 613  | Rsa1.0_10495.1 | 5827   | 5158   | 5811   | 86.1  | 86.3  | 123.4 |
| R3 | CA25       | 54.26 |   |      |     |      |                |        |        |        |       |       |       |
| R3 | CB96       | 54.76 |   |      |     |      |                |        |        |        |       |       |       |
| R3 | RGC4948c   | 55.47 | - | 406  | 0   | 406  | Rsa1.0_01356.1 | 47287  | 15215  | 15621  | 53.7  | 100.0 | 100.0 |
| R3 | RSS2362_a  | 55.57 | - | 530  | 5   | 515  | Rsa1.0_03218.1 | 24539  | 22154  | 23021  | 93.0  | 96.2  | 170.0 |
| R3 | RS2CL5646s | 56.07 | - | 896  | 161 | 896  | Rsa1.0_01356.1 | 47287  | 8247   | 8982   | 78.1  | 82.0  | 100.0 |
| R3 | RSS2207    | 56.58 |   |      |     |      |                |        |        |        |       |       |       |
| R3 | RSS2468    | 56.98 | + | 844  | 0   | 844  | Rsa1.0_02398.1 | 31766  | 584    | 1660   | 98.5  | 100.0 | 127.5 |
| R3 | CB94       | 57.48 |   |      |     |      |                |        |        |        |       |       |       |
| R3 | RGA1712s   | 58.99 |   |      |     |      |                |        |        |        |       |       |       |
| R3 | RS2CL5207s | 59.06 | - | 606  | 50  | 606  |                | 155185 | 137578 | 138293 | 87.5  | 91.8  | 128.6 |
| R3 | RSS2225    | 59.3  | - | 841  | 0   | 332  | Rsa1.0_63300.1 | 362    | 0      | 332    | 39.5  | 39.5  | 100.0 |
| R3 | RGC10740c  | 59.51 | - | 402  | 0   | 402  | Rsa1.0_00732.1 | 66631  | 30568  | 30970  | 100.0 | 100.0 | 100.0 |
| R3 | RSS2174    | 60.19 | + | 643  | 9   | 643  | Rsa1.0_09388.1 | 6405   | 3530   | 4952   | 98.6  | 98.6  | 224.3 |
| R3 | RGB3739c   | 60.33 | - | 506  | 90  | 506  | Rsa1.0_00158.1 | 117999 | 26141  | 26557  | 80.6  | 82.2  | 100.0 |
| R3 | RS2CL3113s | 61.11 | - | 1170 | 0   | 1169 | Rsa1.0_00619.1 | 71985  | 14030  | 15858  | 68.7  | 99.9  | 156.4 |
| R3 | RSS1494    | 61.19 | - | 851  | 0   | 851  | Rsa1.0_00456.1 | 82826  | 78621  | 79473  | 100.0 | 100.0 | 100.1 |
| R3 | RSS3166    | 61.59 | + | 689  | 17  | 689  | Rsa1.0_00539.1 | 76926  | 56537  | 57301  | 93.5  | 97.5  | 113.7 |
| R3 | RS2CL3855s | 61.86 | - | 1355 | 1   | 1355 | Rsa1.0_06218.1 | 11461  | 5565   | 6919   | 39.0  | 99.9  | 100.0 |
| R3 | CF06       | 63.27 |   |      |     |      |                |        |        |        |       |       |       |
| R3 | RGB10862c  | 63.47 | + | 402  | 0   | 402  | Rsa1.0_00207.1 | 248736 | 4742   | 5144   | 100.0 | 100.0 | 100.0 |
| R3 | RSS1258    | 64.87 | - | 203  | 0   | 203  | Rsa1.0_01771.1 | 172709 | 12737  | 12951  | 87.2  | 100.0 | 105.4 |
| R3 | RSS1041    | 65.37 | - | 670  | 0   | 670  | Rsa1.0_01771.1 | 172709 | 8960   | 12980  | 93.9  | 100.0 | 600.0 |

|    |            |       |   |      |    |      |                |        |        |        |       |       |       |
|----|------------|-------|---|------|----|------|----------------|--------|--------|--------|-------|-------|-------|
| R3 | RGC11016c  | 66.07 | + | 468  | 0  | 468  | Rsa1.0_03723.1 | 21173  | 6464   | 6932   | 100.0 | 100.0 | 100.0 |
| R3 | CC42b      | 66.24 |   |      |    |      |                |        |        |        |       |       |       |
| R3 | RGC107c    | 68.06 | + | 460  | 51 | 460  | Rsa1.0_04411.1 | 142979 | 10112  | 10521  | 37.2  | 88.9  | 100.0 |
| R3 | RGC21094c  | 68.06 | + | 416  | 0  | 416  | Rsa1.0_01977.1 | 36559  | 33816  | 34232  | 100.0 | 100.0 | 100.0 |
| R3 | RSS0596    | 68.25 |   |      |    |      |                |        |        |        |       |       |       |
| R3 | RGA1793s   | 68.4  |   |      |    |      |                |        |        |        |       |       |       |
| R3 | RGC8038c   | 68.78 | - | 502  | 0  | 502  | Rsa1.0_00539.1 | 76926  | 74214  | 74716  | 100.0 | 100.0 | 100.0 |
| R3 | RS2CL4752s | 69.57 | - | 1059 | 2  | 1025 | Rsa1.0_02937.1 | 26605  | 22563  | 24225  | 95.9  | 96.6  | 162.5 |
| R3 | RGC19961c  | 70.03 | - | 523  | 0  | 523  | Rsa1.0_00029.1 | 272992 | 146933 | 147456 | 100.0 | 100.0 | 100.0 |
| R3 | RS2CL7278s | 70.4  | + | 727  | 3  | 724  | Rsa1.0_00029.1 | 272992 | 246780 | 247983 | 98.2  | 99.2  | 166.9 |
| R3 | RS2CL4292s | 70.81 | - | 736  | 0  | 736  | Rsa1.0_00743.1 | 177459 | 6116   | 6855   | 95.0  | 100.0 | 100.4 |
| R3 | RGC6864c   | 71.16 | + | 537  | 0  | 537  | Rsa1.0_00029.1 | 272992 | 107808 | 108345 | 100.0 | 100.0 | 100.0 |
| R3 | RS2CL1086s | 72.51 | - | 1239 | 1  | 1239 | Rsa1.0_09069.1 | 6671   | 2073   | 4429   | 98.1  | 99.9  | 190.3 |
| R3 | RS2CL5384s | 72.63 | + | 1085 | 2  | 1081 | Rsa1.0_01325.1 | 48131  | 16462  | 18088  | 91.2  | 99.5  | 150.7 |
| R3 | RGC1367c   | 73.14 | + | 460  | 0  | 460  | Rsa1.0_03552.1 | 22151  | 14759  | 15219  | 100.0 | 100.0 | 100.0 |
| R3 | RSS2543    | 73.19 | + | 874  | 0  | 636  | Rsa1.0_01029.1 | 256254 | 130119 | 131157 | 72.7  | 72.8  | 163.2 |
| R3 | RSS0860    | 73.29 | - | 755  | 10 | 755  | Rsa1.0_03407.1 | 23154  | 9585   | 10331  | 74.2  | 98.7  | 100.1 |
| R3 | RS2CL2414s | 73.89 | - | 938  | 8  | 938  | Rsa1.0_00646.1 | 70473  | 1742   | 3631   | 89.6  | 99.2  | 203.1 |
| R3 | RSS1018    | 74.26 | + | 665  | 0  | 665  | Rsa1.0_02246.1 | 33435  | 22769  | 23778  | 100.0 | 100.0 | 151.7 |
| R3 | RGC4056c   | 74.38 | + | 487  | 0  | 487  | Rsa1.0_02412.1 | 31643  | 19981  | 20468  | 99.2  | 100.0 | 100.0 |
| R3 | RGC5105c   | 74.79 | - | 491  | 0  | 491  | Rsa1.0_02022.1 | 35923  | 14225  | 14716  | 100.0 | 100.0 | 100.0 |
| R3 | RGB37c     | 75.59 | + | 507  | 0  | 483  | Rsa1.0_01373.1 | 47052  | 31981  | 32464  | 95.3  | 95.3  | 100.0 |
| R3 | RS2CL6133s | 75.61 | + | 709  | 3  | 708  | Rsa1.0_00500.1 | 272308 | 143296 | 144004 | 97.7  | 99.4  | 100.4 |
| R3 | RSS0441    | 75.73 | + | 697  | 0  | 697  | Rsa1.0_01220.1 | 161775 | 112671 | 113371 | 97.6  | 100.0 | 100.4 |
| R3 | RS2CL5720s | 76.79 |   |      |    |      |                |        |        |        |       |       |       |
| R3 | RS2CL1398s | 77.71 | - | 747  | 63 | 747  | Rsa1.0_01195.1 | 147988 | 15401  | 16135  | 88.0  | 91.6  | 107.3 |
| R3 | ACGM14     | 78.13 |   |      |    |      |                |        |        |        |       |       |       |
| R3 | RGC5561c   | 78.52 | - | 518  | 0  | 518  | Rsa1.0_00430.1 | 85453  | 27282  | 27800  | 100.0 | 100.0 | 100.0 |
| R3 | RSS3186    | 78.72 | + | 893  | 0  | 893  | Rsa1.0_00710.1 | 67325  | 254    | 1817   | 51.0  | 100.0 | 175.0 |
| R3 | RGC4447c   | 79.22 | - | 453  | 0  | 453  | Rsa1.0_01364.1 | 47172  | 41888  | 42341  | 62.7  | 100.0 | 100.0 |
| R3 | RS2CL2857s | 79.26 | - | 788  | 0  | 787  | Rsa1.0_06345.1 | 11205  | 925    | 2655   | 99.5  | 99.9  | 219.8 |
| R3 | RS2CL4154s | 79.62 | - | 1073 | 2  | 1073 | Rsa1.0_00934.1 | 193516 | 175206 | 176640 | 98.4  | 99.8  | 133.9 |
| R3 | RS2CL4178s | 79.71 | - | 1050 | 4  | 1050 | Rsa1.0_01612.1 | 42255  | 34975  | 36022  | 99.2  | 99.6  | 100.1 |
| R3 | CC55       | 79.89 |   |      |    |      |                |        |        |        |       |       |       |
| R3 | RGC15812c  | 79.91 | - | 438  | 0  | 438  | Rsa1.0_00452.1 | 83201  | 54975  | 55413  | 100.0 | 100.0 | 100.0 |
| R3 | RGC16357c  | 80.36 | + | 451  | 0  | 224  | Rsa1.0_02119.1 | 34833  | 18772  | 18996  | 49.7  | 49.7  | 100.0 |

|    |            |       |   |      |    |      |                |        |        |        |       |       |       |
|----|------------|-------|---|------|----|------|----------------|--------|--------|--------|-------|-------|-------|
| R3 | RS2CL4585s | 80.4  | + | 1016 | 2  | 1015 | Rsa1.0_03442.1 | 22927  | 21657  | 22675  | 99.4  | 99.7  | 100.5 |
| R3 | RS2CL4689s | 81.12 | + | 1017 | 2  | 1017 | Rsa1.0_02119.1 | 34833  | 5614   | 8012   | 96.3  | 99.8  | 236.3 |
| R3 | RGC7054c   | 81.5  | + | 496  | 69 | 496  | Rsa1.0_03404.1 | 23177  | 9160   | 9587   | 86.1  | 86.1  | 100.0 |
| R3 | RGC6178c   | 81.75 | + | 480  | 5  | 480  | Rsa1.0_00607.1 | 73146  | 43552  | 44027  | 67.9  | 99.0  | 100.0 |
| R3 | RGC11372c  | 81.97 | - | 503  | 0  | 503  | Rsa1.0_00263.1 | 224968 | 177144 | 177647 | 100.0 | 100.0 | 100.0 |
| R3 | RGC13408c  | 81.97 | - | 447  | 0  | 343  | Rsa1.0_03734.1 | 21103  | 16781  | 17124  | 38.5  | 76.7  | 100.0 |
| R3 | RSS1570    | 82.01 | + | 260  | 0  | 168  | Rsa1.0_01754.1 | 39792  | 13218  | 13389  | 63.9  | 64.6  | 101.8 |
| R3 | RS2CL4158s | 82.28 | + | 1170 | 3  | 1170 | Rsa1.0_00158.1 | 117999 | 12952  | 14870  | 99.2  | 99.7  | 164.4 |
| R3 | RS2CL7432s | 82.98 | - | 1021 | 1  | 1021 | Rsa1.0_02407.1 | 31684  | 9268   | 10562  | 97.4  | 99.9  | 126.9 |
| R3 | RGC11660c  | 83.31 | + | 431  | 0  | 431  | Rsa1.0_00316.1 | 96264  | 82673  | 83104  | 100.0 | 100.0 | 100.0 |
| R3 | RGC12742c  | 83.31 |   |      |    |      |                |        |        |        |       |       |       |
| R3 | RGC1543c   | 83.31 | + | 432  | 0  | 432  | Rsa1.0_00511.1 | 78616  | 35860  | 36292  | 100.0 | 100.0 | 100.0 |
| R3 | RSS3173    | 83.56 | + | 502  | 1  | 502  | Rsa1.0_04049.1 | 19385  | 17902  | 18404  | 95.4  | 99.8  | 100.2 |
| R3 | RSS3827    | 84.06 | - | 376  | 0  | 376  | Rsa1.0_01552.1 | 43396  | 35214  | 35555  | 89.6  | 100.0 | 90.7  |
| R3 | RS2CL7533s | 84.39 | - | 1193 | 2  | 1192 | Rsa1.0_00851.1 | 62181  | 20311  | 21501  | 93.9  | 99.8  | 100.0 |
| R3 | RS2CL1880s | 84.55 | - | 906  | 0  | 906  | Rsa1.0_00607.1 | 73146  | 21253  | 22235  | 100.0 | 100.0 | 108.4 |
| R3 | CC34       | 84.56 |   |      |    |      |                |        |        |        |       |       |       |
| R3 | RGC24282c  | 85.01 | - | 446  | 0  | 446  | Rsa1.0_02407.1 | 31684  | 27458  | 27904  | 100.0 | 100.0 | 100.0 |
| R3 | RSS1161    | 85.63 | - | 689  | 0  | 689  | Rsa1.0_00263.1 | 224968 | 178599 | 179812 | 99.7  | 100.0 | 176.1 |
| R3 | RGC18238c  | 86.01 | + | 456  | 0  | 435  | Rsa1.0_02283.1 | 33024  | 23646  | 24081  | 95.4  | 95.4  | 100.0 |
| R3 | RGC19084c  | 86.01 | + | 554  | 0  | 554  | Rsa1.0_03528.1 | 22278  | 19759  | 20313  | 93.3  | 100.0 | 100.0 |
| R3 | RGC5954c   | 86.01 | + | 491  | 0  | 491  | Rsa1.0_02399.1 | 31763  | 20318  | 20809  | 100.0 | 100.0 | 100.0 |
| R3 | RGC8553c   | 86.09 | + | 595  | 0  | 595  | Rsa1.0_00467.1 | 156542 | 103948 | 104543 | 100.0 | 100.0 | 100.0 |
| R3 | RS2CL3230s | 86.71 | - | 867  | 2  | 867  | Rsa1.0_00511.1 | 78616  | 34987  | 36128  | 99.1  | 99.8  | 131.9 |
| R3 | RSS1549    | 87.26 | + | 843  | 0  | 843  | Rsa1.0_00316.1 | 96264  | 57233  | 58469  | 93.4  | 100.0 | 146.6 |
| R3 | RGC7922c   | 87.46 | + | 485  | 0  | 485  | Rsa1.0_01857.1 | 38103  | 7320   | 7805   | 100.0 | 100.0 | 100.0 |
| R3 | RSS0198    | 87.66 | + | 819  | 53 | 819  | Rsa1.0_00467.1 | 156542 | 142692 | 143766 | 93.5  | 93.5  | 140.2 |
| R3 | RS2CL3016s | 88.22 | - | 1505 | 2  | 1490 | Rsa1.0_04434.1 | 17377  | 7290   | 8978   | 87.5  | 98.9  | 113.4 |
| R3 | CB53H      | 88.66 |   |      |    |      |                |        |        |        |       |       |       |
| R3 | RGB2123c   | 89.04 | - | 435  | 0  | 435  |                | 358124 | 146014 | 146449 | 100.0 | 100.0 | 100.0 |
| R3 | RS2CL3633s | 89.42 | - | 1067 | 0  | 1067 | Rsa1.0_00187.1 | 393093 | 206988 | 208775 | 99.2  | 100.0 | 167.5 |
| R3 | RS2CL2659s | 89.47 | - | 654  | 0  | 654  | Rsa1.0_07936.1 | 8228   | 3330   | 4444   | 97.4  | 100.0 | 170.3 |
| R3 | RS2CL2865s | 89.84 | + | 675  | 2  | 675  | Rsa1.0_00603.1 | 73299  | 32351  | 33090  | 97.9  | 99.7  | 109.8 |
| R3 | RSS3644    | 90.06 | - | 826  | 0  | 826  | Rsa1.0_01558.1 | 43287  | 39126  | 40847  | 60.1  | 100.0 | 208.4 |
| R3 | RS2CL2009s | 90.52 | - | 798  | 0  | 798  | Rsa1.0_05239.1 | 14410  | 11681  | 13080  | 92.5  | 100.0 | 175.3 |
| R3 | RGC11410c  | 90.76 | - | 560  | 0  | 560  | Rsa1.0_01008.1 | 56924  | 28901  | 29461  | 100.0 | 100.0 | 100.0 |

|    |            |        |   |      |     |      |                |        |        |        |       |       |       |
|----|------------|--------|---|------|-----|------|----------------|--------|--------|--------|-------|-------|-------|
| R3 | RS2CL6931s | 92.01  | - | 1382 | 2   | 1378 | Rsa1.0_02215.1 | 33822  | 8381   | 10064  | 74.6  | 99.6  | 122.3 |
| R3 | RGC8634c   | 93.98  | + | 533  | 0   | 533  | Rsa1.0_00103.1 | 135304 | 68095  | 68628  | 74.1  | 100.0 | 100.0 |
| R3 | RSS3933    | 97.66  | - | 782  | 240 | 782  | Rsa1.0_00452.1 | 83201  | 57372  | 57914  | 69.3  | 69.3  | 100.0 |
| R3 | RS2CL5949s | 98.6   | + | 975  | 2   | 975  | Rsa1.0_17397.1 | 1840   | 412    | 1383   | 87.8  | 99.8  | 99.8  |
| R3 | RGC5211c   | 100.2  |   |      |     |      |                |        |        |        |       |       |       |
| R3 | RS2CL6711s | 101.22 | - | 1067 | 0   | 1067 | Rsa1.0_00275.1 | 210104 | 14871  | 15941  | 99.1  | 100.0 | 100.3 |
| R4 | RSS1627    | 0      | + | 645  | 1   | 645  | Rsa1.0_00092.1 | 659932 | 182526 | 183740 | 99.8  | 99.8  | 188.5 |
| R4 | RGC355c    | 4.7    | + | 693  | 0   | 693  | Rsa1.0_00340.1 | 305782 | 115174 | 115867 | 86.4  | 100.0 | 100.0 |
| R4 | CA83H      | 5.5    |   |      |     |      |                |        |        |        |       |       |       |
| R4 | ACGM20     | 8.8    |   |      |     |      |                |        |        |        |       |       |       |
| R4 | RS2CL966s  | 9.32   | + | 1121 | 2   | 1080 | Rsa1.0_00211.1 | 228189 | 179312 | 180707 | 93.1  | 96.2  | 129.4 |
| R4 | CD72cH     | 9.6    |   |      |     |      |                |        |        |        |       |       |       |
| R4 | RS2CL2691s | 10.56  | - | 1072 | 4   | 1071 | Rsa1.0_00211.1 | 228189 | 144636 | 146110 | 94.8  | 99.5  | 138.1 |
| R4 | RSS1586    | 11.7   | + | 857  | 0   | 857  |                | 167185 | 162187 | 163122 | 99.8  | 100.0 | 109.1 |
| R4 | RS2CL5798s | 11.98  | + | 975  | 1   | 975  | Rsa1.0_06209.1 | 11484  | 7932   | 9555   | 89.1  | 99.9  | 166.6 |
| R4 | RSS2559    | 12     | + | 820  | 0   | 820  |                | 341668 | 282404 | 283224 | 99.9  | 100.0 | 100.0 |
| R4 | RGC2155c   | 12.54  | - | 507  | 0   | 507  | Rsa1.0_00011.1 | 225044 | 28429  | 28936  | 100.0 | 100.0 | 100.0 |
| R4 | RGA1914s   | 12.79  |   |      |     |      |                |        |        |        |       |       |       |
| R4 | RGC4083c   | 13.03  | - | 471  | 0   | 471  | Rsa1.0_00237.1 | 235974 | 168752 | 169223 | 80.9  | 100.0 | 100.0 |
| R4 | RS2CL2103s | 13.47  | - | 1278 | 3   | 1278 | Rsa1.0_00327.1 | 94892  | 22326  | 23851  | 75.1  | 99.8  | 119.6 |
| R4 | RS2CL3614s | 14.17  | - | 743  | 0   | 743  | Rsa1.0_00237.1 | 235974 | 188233 | 189221 | 99.9  | 100.0 | 133.0 |
| R4 | RS2CL4701s | 14.25  |   |      |     |      |                |        |        |        |       |       |       |
| R4 | RSS1544    | 14.4   | + | 848  | 0   | 848  |                | 341668 | 47623  | 48829  | 84.7  | 100.0 | 142.2 |
| R4 | RGB10057c  | 14.55  | + | 438  | 0   | 438  | Rsa1.0_00712.1 | 67217  | 20748  | 21148  | 91.3  | 100.0 | 91.3  |
| R4 | RGC14416c  | 14.55  | + | 406  | 89  | 406  | Rsa1.0_00621.1 | 71840  | 41096  | 41413  | 78.1  | 78.1  | 100.0 |
| R4 | RS2CL4127s | 14.75  |   |      |     |      |                |        |        |        |       |       |       |
| R4 | RS2CL5450s | 14.9   | + | 712  | 117 | 711  | Rsa1.0_00237.1 | 235974 | 40735  | 41422  | 81.5  | 83.4  | 115.7 |
| R4 | CD34aH     | 15     |   |      |     |      |                |        |        |        |       |       |       |
| R4 | RGA1981s   | 15.06  |   |      |     |      |                |        |        |        |       |       |       |
| R4 | RS2CL3293s | 15.26  | - | 1285 | 1   | 1285 | Rsa1.0_00237.1 | 235974 | 41503  | 43369  | 97.5  | 99.9  | 145.3 |
| R4 | RS2CL5513s | 15.43  | - | 721  | 0   | 717  | Rsa1.0_05923.1 | 12230  | 1985   | 3092   | 96.5  | 99.5  | 154.4 |
| R4 | RS2CL1187s | 15.53  | - | 776  | 3   | 760  | Rsa1.0_00870.1 | 61606  | 24774  | 26176  | 91.6  | 97.6  | 185.2 |
| R4 | RS2CL1264s | 15.6   | - | 1125 | 2   | 1124 | Rsa1.0_01448.1 | 45645  | 20602  | 21798  | 96.8  | 99.7  | 106.6 |
| R4 | RS2CL1262s | 15.72  |   |      |     |      |                |        |        |        |       |       |       |
| R4 | RS2CL6586s | 15.76  | - | 931  | 1   | 930  | Rsa1.0_02220.1 | 176031 | 156517 | 157541 | 85.6  | 99.8  | 110.2 |





|    |            |       |   |      |    |      |                |        |        |        |       |       |       |
|----|------------|-------|---|------|----|------|----------------|--------|--------|--------|-------|-------|-------|
| R4 | RS2CL5025s | 23.45 | + | 1330 | 1  | 1329 | Rsa1.0_00708.1 | 67366  | 12730  | 14579  | 97.1  | 99.9  | 139.2 |
| R4 | RGB16843c  | 23.8  | - | 410  | 0  | 410  | Rsa1.0_00003.1 | 340054 | 256661 | 257071 | 100.0 | 100.0 | 100.0 |
| R4 | RS2CL7051s | 23.81 | + | 712  | 2  | 712  | Rsa1.0_08460.1 | 7315   | 4224   | 5487   | 99.7  | 99.7  | 177.9 |
| R4 | RSS0858    | 23.99 | + | 599  | 15 | 599  |                | 316976 | 33937  | 34806  | 96.8  | 97.5  | 148.8 |
| R4 | RGC3995c   | 24.04 |   |      |    |      |                |        |        |        |       |       |       |
| R4 | RS2CL4212s | 24.6  | + | 1314 | 2  | 1314 | Rsa1.0_00119.1 | 467509 | 90515  | 92289  | 96.8  | 99.9  | 135.2 |
| R4 | RSS3799    | 24.91 | + | 771  | 0  | 771  | Rsa1.0_00042.1 | 171507 | 2942   | 3713   | 99.9  | 100.0 | 100.0 |
| R4 | RS2CL3610s | 25.64 | - | 1099 | 2  | 1098 | Rsa1.0_01949.1 | 36960  | 20439  | 22086  | 96.5  | 99.7  | 150.3 |
| R4 | RSS3591    | 25.75 | + | 722  | 7  | 722  | Rsa1.0_01777.1 | 39511  | 21604  | 22624  | 97.9  | 99.0  | 142.7 |
| R4 | RGB5549c   | 25.85 | + | 442  | 0  | 442  | Rsa1.0_00119.1 | 467509 | 392627 | 393095 | 99.3  | 100.0 | 105.9 |
| R4 | RSS2846    | 26.7  |   |      |    |      |                |        |        |        |       |       |       |
| R4 | RS2CL7588s | 26.76 | - | 1119 | 2  | 1119 | Rsa1.0_00119.1 | 467509 | 385647 | 387377 | 92.5  | 99.8  | 154.9 |
| R4 | RGC1455c   | 27.17 | + | 494  | 0  | 494  | Rsa1.0_00042.1 | 171507 | 169928 | 170422 | 100.0 | 100.0 | 100.0 |
| R4 | RS2CL4804s | 27.78 | + | 1197 | 2  | 1197 | Rsa1.0_01949.1 | 36960  | 10403  | 11867  | 98.8  | 99.8  | 122.5 |
| R4 | RS2CL3599s | 28.31 | + | 1037 | 2  | 1037 | Rsa1.0_03818.1 | 20668  | 16600  | 18540  | 98.6  | 99.8  | 187.4 |
| R4 | RS2CL4311s | 28.72 | + | 1205 | 1  | 1205 | Rsa1.0_00524.1 | 169613 | 151107 | 152386 | 84.6  | 99.9  | 106.2 |
| R4 | CB92       | 28.89 |   |      |    |      |                |        |        |        |       |       |       |
| R4 | RS2CL6294s | 28.95 | + | 997  | 1  | 989  | Rsa1.0_00524.1 | 169613 | 97545  | 99764  | 92.2  | 99.1  | 224.6 |
| R4 | RS2CL2726s | 29.25 | - | 692  | 20 | 691  | Rsa1.0_01355.1 | 47303  | 39403  | 40080  | 87.7  | 97.0  | 100.9 |
| R4 | RGA173s    | 29.73 |   |      |    |      |                |        |        |        |       |       |       |
| R4 | RS2CL4162s | 30.03 | + | 984  | 0  | 984  | Rsa1.0_01191.1 | 51235  | 16630  | 19656  | 99.0  | 100.0 | 307.5 |
| R4 | RSS1249_a  | 30.36 | + | 474  | 0  | 406  | Rsa1.0_02860.1 | 27207  | 15218  | 16432  | 85.4  | 85.7  | 299.0 |
| R4 | RS2CL3606s | 30.37 | + | 1206 | 2  | 1203 | Rsa1.0_00347.1 | 93048  | 90998  | 92429  | 94.4  | 99.6  | 119.2 |
| R4 | RSS3924    | 30.9  | + | 891  | 1  | 891  | Rsa1.0_00369.1 | 266462 | 203222 | 204992 | 88.8  | 99.9  | 198.9 |
| R4 | RS2CL7525s | 30.95 | + | 641  | 2  | 631  | Rsa1.0_04066.1 | 19262  | 7130   | 8580   | 83.8  | 98.1  | 230.5 |
| R4 | RS2CL2655s | 31.06 | + | 1428 | 2  | 1428 | Rsa1.0_00369.1 | 266462 | 165219 | 168399 | 97.8  | 99.9  | 223.0 |
| R4 | RS2CL2361s | 31.12 | + | 759  | 0  | 759  | Rsa1.0_00369.1 | 266462 | 192289 | 193480 | 96.8  | 100.0 | 156.9 |
| R4 | Rs2CL2299s | 31.5  | - | 986  | 2  | 986  | Rsa1.0_00369.1 | 266462 | 4548   | 5879   | 97.3  | 99.8  | 135.3 |
| R4 | RGC21796c  | 31.84 | + | 425  | 0  | 425  | Rsa1.0_04027.1 | 19501  | 9765   | 10190  | 100.0 | 100.0 | 100.0 |
| R4 | RGC11816c  | 32.14 | + | 437  | 0  | 437  | Rsa1.0_01191.1 | 51235  | 29970  | 30407  | 100.0 | 100.0 | 100.0 |
| R4 | RGC5691c   | 32.14 | - | 411  | 0  | 411  | Rsa1.0_16327.1 | 2198   | 712    | 1123   | 100.0 | 100.0 | 100.0 |
| R4 | RS2CL3326s | 32.59 | + | 1317 | 2  | 1312 | Rsa1.0_02228.1 | 33688  | 15710  | 17716  | 97.7  | 99.5  | 153.1 |
| R4 | CA87       | 32.86 |   |      |    |      |                |        |        |        |       |       |       |
| R4 | RS2CL4218s | 32.9  | + | 1024 | 0  | 1024 | Rsa1.0_06797.1 | 10342  | 3819   | 5057   | 93.9  | 100.0 | 120.9 |
| R4 | RS2CL7603s | 33.33 | + | 712  | 1  | 712  | Rsa1.0_00576.1 | 178949 | 62962  | 63934  | 92.1  | 99.9  | 136.7 |
| R4 | RS2CL7351s | 33.61 | - | 914  | 4  | 914  | Rsa1.0_00576.1 | 178949 | 39367  | 40658  | 99.0  | 99.6  | 141.9 |

|    |            |       |   |      |     |      |                |        |        |        |       |       |       |
|----|------------|-------|---|------|-----|------|----------------|--------|--------|--------|-------|-------|-------|
| R4 | RSS1971    | 33.82 | - | 866  | 4   | 866  | Rsa1.0_00383.1 | 398431 | 2241   | 3430   | 93.4  | 99.5  | 137.9 |
| R4 | RS2CL6125s | 34.15 | + | 888  | 2   | 888  | Rsa1.0_00146.1 | 149343 | 135719 | 136611 | 95.6  | 99.8  | 100.7 |
| R4 | RGB15964c  | 34.42 | - | 550  | 136 | 550  | Rsa1.0_00576.1 | 178949 | 54823  | 55237  | 75.3  | 75.3  | 100.0 |
| R4 | RGC1115c   | 34.88 | + | 421  | 0   | 421  | Rsa1.0_06842.1 | 10285  | 9128   | 9548   | 98.1  | 100.0 | 99.8  |
| R4 | RGC21614c  | 34.88 | + | 402  | 0   | 381  | Rsa1.0_00383.1 | 398431 | 165886 | 166267 | 94.8  | 94.8  | 100.0 |
| R4 | RGC9615c   | 34.88 | - | 407  | 0   | 407  | Rsa1.0_04066.1 | 19262  | 1224   | 1631   | 100.0 | 100.0 | 100.0 |
| R4 | RSS2202    | 35.03 | + | 826  | 0   | 826  | Rsa1.0_00146.1 | 149343 | 43374  | 45392  | 91.8  | 100.0 | 244.3 |
| R4 | RS2CL5759s | 35.06 | - | 835  | 2   | 835  |                | 42964  | 15015  | 16178  | 96.2  | 99.8  | 139.6 |
| R4 | RGC17618c  | 35.16 | - | 400  | 0   | 400  | Rsa1.0_00302.1 | 97521  | 17760  | 18160  | 100.0 | 100.0 | 100.0 |
| R4 | RSS0067    | 35.99 | + | 751  | 10  | 751  | Rsa1.0_00302.1 | 97521  | 86296  | 87537  | 91.1  | 98.7  | 167.5 |
| R4 | RSS0178    | 36.89 | + | 804  | 1   | 804  | Rsa1.0_00837.1 | 62568  | 4114   | 5140   | 99.9  | 99.9  | 127.8 |
| R4 | RSS1636    | 37.29 | + | 498  | 1   | 497  | Rsa1.0_04159.1 | 18795  | 12148  | 12636  | 94.8  | 99.6  | 98.4  |
| R4 | RS2CL1832s | 39.19 | - | 1073 | 0   | 1073 | Rsa1.0_00870.1 | 61606  | 27393  | 28837  | 97.8  | 100.0 | 134.6 |
| R4 | CA24       | 41.29 |   |      |     |      |                |        |        |        |       |       |       |
| R4 | RGC21459c  | 42.16 | - | 542  | 0   | 542  | Rsa1.0_00182.1 | 142305 | 63791  | 64333  | 100.0 | 100.0 | 100.0 |
| R4 | RS2CL1097s | 42.88 | + | 822  | 2   | 820  | Rsa1.0_00044.1 | 271658 | 137918 | 139348 | 97.0  | 99.5  | 174.8 |
| R4 | RS2CL5633s | 43.92 | - | 980  | 1   | 980  | Rsa1.0_00251.1 | 303968 | 58128  | 60009  | 96.8  | 99.9  | 192.1 |
| R4 | RGC13382c  | 44.44 | - | 435  | 0   | 435  | Rsa1.0_00362.1 | 299497 | 18932  | 19367  | 100.0 | 100.0 | 100.0 |
| R4 | RGC17631c  | 44.44 | - | 527  | 0   | 527  | Rsa1.0_00818.1 | 62939  | 5383   | 5910   | 100.0 | 100.0 | 100.0 |
| R4 | RGC2699c   | 44.44 | + | 458  | 0   | 458  | Rsa1.0_01566.1 | 43134  | 32982  | 33440  | 100.0 | 100.0 | 100.0 |
| R4 | RS2CL4419s | 45.05 | - | 1212 | 1   | 1212 | Rsa1.0_03132.1 | 25142  | 7930   | 9489   | 98.0  | 99.9  | 128.7 |
| R4 | RGC4505c   | 45.62 | + | 487  | 0   | 487  | Rsa1.0_00044.1 | 271658 | 111698 | 112185 | 71.7  | 100.0 | 100.0 |
| R4 | RS2CL3258s | 46.01 | + | 956  | 0   | 954  | Rsa1.0_02777.1 | 27986  | 6280   | 8154   | 98.0  | 99.8  | 196.4 |
| R4 | RGA2287s   | 46.24 |   |      |     |      |                |        |        |        |       |       |       |
| R4 | RS2CL5222s | 46.57 |   |      |     |      |                |        |        |        |       |       |       |
| R4 | RS2CL2500s | 46.6  | - | 744  | 31  | 418  | Rsa1.0_05821.1 | 12531  | 4015   | 4502   | 52.0  | 52.0  | 125.8 |
| R4 | RS2CL3360s | 46.73 | + | 1016 | 11  | 1016 | Rsa1.0_00243.1 | 103651 | 42167  | 43169  | 94.7  | 98.9  | 99.7  |
| R4 | CF16       | 47    |   |      |     |      |                |        |        |        |       |       |       |
| R4 | RS2CL6318s | 47.2  | - | 1050 | 1   | 1050 | Rsa1.0_05821.1 | 12531  | 8087   | 9762   | 98.2  | 99.9  | 159.7 |
| R4 | RGC18965c  | 47.36 | + | 442  | 72  | 442  | Rsa1.0_01509.1 | 44258  | 22521  | 22891  | 83.7  | 83.7  | 100.0 |
| R4 | RS2CL2926s | 47.48 | - | 557  | 2   | 557  | Rsa1.0_00923.1 | 153678 | 23046  | 24295  | 98.6  | 99.6  | 225.1 |
| R4 | RS2CL6239s | 47.77 | - | 659  | 27  | 659  | Rsa1.0_00243.1 | 103651 | 92356  | 93103  | 85.4  | 95.9  | 118.2 |
| R4 | RSS2705    | 47.83 | - | 856  | 0   | 856  |                | 75219  | 2039   | 3002   | 100.0 | 100.0 | 112.5 |
| R4 | RSS1127    | 48.13 | - | 831  | 0   | 831  |                | 495407 | 401649 | 402846 | 96.9  | 100.0 | 144.0 |
| R4 | RSS3772    | 48.43 | + | 550  | 3   | 550  | Rsa1.0_04789.1 | 15981  | 10007  | 10559  | 90.7  | 99.5  | 100.9 |
| R4 | RGB3765c   | 48.58 | + | 412  | 0   | 412  | Rsa1.0_01110.1 | 195852 | 179047 | 179459 | 100.0 | 100.0 | 100.0 |

|    |            |       |   |      |    |      |                |        |       |        |       |       |       |
|----|------------|-------|---|------|----|------|----------------|--------|-------|--------|-------|-------|-------|
| R4 | RS2CL7398s | 49.31 | + | 1227 | 1  | 1227 | Rsa1.0_00243.1 | 103651 | 85901 | 87118  | 86.2  | 99.9  | 99.3  |
| R4 | RSS0396    | 49.97 | + | 745  | 0  | 745  |                | 97747  | 81041 | 82435  | 96.6  | 100.0 | 187.1 |
| R4 | RSS0839    | 49.97 | + | 806  | 0  | 806  |                | 97747  | 81636 | 82882  | 96.5  | 100.0 | 154.6 |
| R4 | RSS1418    | 50.35 | + | 577  | 11 | 577  |                | 97747  | 53036 | 53679  | 98.1  | 98.1  | 113.6 |
| R4 | RSS3863    | 50.35 | + | 775  | 0  | 775  | Rsa1.0_02798.1 | 27792  | 5380  | 6688   | 96.3  | 100.0 | 168.8 |
| R4 | RGC21483c  | 50.8  | - | 407  | 0  | 308  | Rsa1.0_04200.1 | 18490  | 10290 | 10598  | 75.7  | 75.7  | 100.0 |
| R4 | RSS0936    | 50.82 | - | 786  | 0  | 786  | Rsa1.0_01696.1 | 301850 | 28625 | 29953  | 95.0  | 100.0 | 169.0 |
| R4 | RSS1675    | 51.12 | - | 849  | 77 | 838  |                | 97747  | 4014  | 4775   | 56.4  | 89.6  | 100.0 |
| R4 | RS2CL2021s | 52.06 | - | 915  | 2  | 915  | Rsa1.0_02247.1 | 33427  | 27283 | 28994  | 95.4  | 99.8  | 187.4 |
| R4 | RGB25198c  | 52.36 | + | 454  | 0  | 454  | Rsa1.0_00294.1 | 144860 | 24720 | 25174  | 100.0 | 100.0 | 100.0 |
| R4 | RSS0033    | 53.1  | + | 853  | 1  | 853  | Rsa1.0_03843.1 | 20496  | 9905  | 11432  | 96.0  | 99.9  | 179.2 |
| R4 | RS2CL5851s | 53.33 | + | 620  | 1  | 620  | Rsa1.0_01110.1 | 195852 | 28210 | 28833  | 99.4  | 99.8  | 100.7 |
| R4 | RGC7341c   | 53.7  | + | 537  | 0  | 537  | Rsa1.0_01110.1 | 195852 | 19273 | 19810  | 100.0 | 100.0 | 100.0 |
| R4 | RS2CL4350s | 53.79 | - | 684  | 0  | 684  |                | 97747  | 22867 | 23714  | 99.4  | 100.0 | 123.8 |
| R4 | CB05       | 53.92 |   |      |    |      |                |        |       |        |       |       |       |
| R4 | RGC2885c   | 54.63 | + | 402  | 0  | 402  | Rsa1.0_00886.1 | 167350 | 9294  | 9696   | 100.0 | 100.0 | 100.0 |
| R4 | RS2CL6990s | 54.9  | - | 741  | 2  | 735  | Rsa1.0_00985.1 | 161950 | 32296 | 33211  | 91.9  | 98.9  | 124.8 |
| R4 | RGC10051c  | 55.53 | + | 454  | 0  | 454  | Rsa1.0_03843.1 | 20496  | 3239  | 3693   | 100.0 | 100.0 | 100.0 |
| R4 | CD11aH     | 56.72 |   |      |    |      |                |        |       |        |       |       |       |
| R4 | RS2CL2925s | 56.83 | - | 1372 | 0  | 1369 | Rsa1.0_01459.1 | 45277  | 35840 | 37209  | 75.4  | 99.8  | 100.0 |
| R4 | RGC17385c  | 57.02 | - | 447  | 0  | 447  | Rsa1.0_07638.1 | 8967   | 8112  | 8559   | 100.0 | 100.0 | 100.0 |
| R4 | RSS3637    | 57.69 | + | 793  | 4  | 793  | Rsa1.0_14327.1 | 3518   | 597   | 1449   | 99.4  | 99.5  | 108.0 |
| R4 | Rs2CL2178s | 58.46 | - | 816  | 3  | 816  |                | 66432  | 11911 | 13472  | 48.2  | 99.6  | 192.0 |
| R4 | RGC2356c   | 59.5  | + | 485  | 0  | 485  | Rsa1.0_00126.1 | 127534 | 37800 | 38285  | 100.0 | 100.0 | 100.0 |
| R4 | RSS3616    | 59.85 | - | 847  | 0  | 847  | Rsa1.0_00057.1 | 160473 | 70666 | 72057  | 99.1  | 100.0 | 164.2 |
| R4 | RS2CL5879s | 60.87 | - | 1137 | 1  | 1137 | Rsa1.0_00238.1 | 193193 | 99096 | 100517 | 99.6  | 99.9  | 125.1 |
| R4 | RS2CL5717s | 61.19 | + | 1148 | 0  | 1147 |                | 80937  | 30206 | 31713  | 97.0  | 99.9  | 131.4 |
| R4 | RGB4922c   | 61.51 | - | 511  | 0  | 511  | Rsa1.0_04846.1 | 15739  | 5259  | 5770   | 100.0 | 100.0 | 100.0 |
| R4 | RGC9577c   | 62.06 | + | 507  | 0  | 507  |                | 101125 | 44990 | 45497  | 100.0 | 100.0 | 100.0 |
| R4 | Z30817     | 62.64 |   |      |    |      |                |        |       |        |       |       |       |
| R4 | RS2CL7473s | 62.89 | + | 782  | 8  | 764  |                | 101125 | 60423 | 61232  | 87.6  | 96.7  | 107.0 |
| R4 | RGC10583c  | 63.35 | - | 552  | 0  | 552  |                | 106231 | 66280 | 66832  | 100.0 | 100.0 | 100.0 |
| R4 | RGC2146c   | 63.35 | + | 403  | 0  | 403  | Rsa1.0_13824.1 | 4259   | 2721  | 3124   | 100.0 | 100.0 | 100.0 |
| R4 | RGC3356c   | 63.35 | - | 561  | 0  | 561  | Rsa1.0_06215.1 | 11478  | 5208  | 5769   | 99.6  | 100.0 | 100.0 |
| R4 | CB39       | 64.56 |   |      |    |      |                |        |       |        |       |       |       |
| R4 | RS2CL1232s | 64.61 | + | 887  | 1  | 885  | Rsa1.0_00884.1 | 61150  | 48101 | 48981  | 82.4  | 99.7  | 99.6  |

|    |            |       |   |      |     |      |                |        |        |        |       |       |       |
|----|------------|-------|---|------|-----|------|----------------|--------|--------|--------|-------|-------|-------|
| R4 | RSS0369    | 65.4  | - | 815  | 0   | 815  | Rsa1.0_00526.1 | 169279 | 165179 | 165994 | 100.0 | 100.0 | 100.0 |
| R4 | CA83       | 66    |   |      |     |      |                |        |        |        |       |       |       |
| R4 | CB86       | 66.6  |   |      |     |      |                |        |        |        |       |       |       |
| R4 | RSS3516    | 68.1  | + | 856  | 0   | 856  | Rsa1.0_00584.1 | 74295  | 9334   | 10186  | 97.4  | 100.0 | 99.5  |
| R4 | RSS1061    | 69.2  | - | 881  | 0   | 881  | Rsa1.0_00520.1 | 78226  | 2471   | 3355   | 98.1  | 100.0 | 100.3 |
| R4 | RSS0008    | 69.5  | + | 732  | 45  | 732  | Rsa1.0_01189.1 | 51358  | 8605   | 9325   | 85.7  | 93.9  | 104.8 |
| R4 | RSS3919    | 69.6  | - | 789  | 0   | 789  | Rsa1.0_04167.1 | 18757  | 17259  | 18389  | 99.9  | 100.0 | 143.2 |
| R4 | Rs2CL1980s | 70.35 | + | 1237 | 2   | 1236 | Rsa1.0_01298.1 | 48999  | 6687   | 8921   | 99.4  | 99.8  | 181.0 |
| R4 | RS2CL5596s | 71.35 |   |      |     |      |                |        |        |        |       |       |       |
| R4 | CC19N      | 71.79 |   |      |     |      |                |        |        |        |       |       |       |
| R4 | RGC11405c  | 72.03 | - | 497  | 0   | 497  | Rsa1.0_01646.1 | 41735  | 31905  | 32402  | 98.6  | 100.0 | 100.0 |
| R4 | RS2CL1344s | 72.44 |   |      |     |      |                |        |        |        |       |       |       |
| R4 | RGC3002c   | 72.8  | - | 407  | 0   | 407  | Rsa1.0_01096.1 | 54266  | 5593   | 6000   | 100.0 | 100.0 | 100.0 |
| R4 | RGC21423c  | 73.12 | - | 442  | 0   | 442  |                | 251946 | 36857  | 37299  | 93.2  | 100.0 | 100.0 |
| R4 | RS2CL4378s | 73.31 | + | 850  | 2   | 850  | Rsa1.0_02462.1 | 31158  | 2654   | 3675   | 99.3  | 99.8  | 120.4 |
| R4 | CD72b      | 73.38 |   |      |     |      |                |        |        |        |       |       |       |
| R4 | RGA1767s   | 73.47 |   |      |     |      |                |        |        |        |       |       |       |
| R4 | RS2CL6532s | 73.68 | - | 826  | 1   | 825  | Rsa1.0_02301.1 | 32835  | 28179  | 29148  | 99.5  | 99.8  | 117.6 |
| R4 | RS2CL738s  | 74.44 | - | 1506 | 0   | 1506 | Rsa1.0_05431.1 | 13780  | 5275   | 8243   | 99.8  | 100.0 | 197.1 |
| R4 | RS2CL7671s | 74.49 | - | 784  | 1   | 784  | Rsa1.0_02615.1 | 29547  | 15678  | 16914  | 98.9  | 99.9  | 157.9 |
| R4 | RS2CL4635s | 74.62 | + | 660  | 0   | 660  | Rsa1.0_00274.1 | 210119 | 66474  | 67561  | 99.6  | 100.0 | 164.7 |
| R4 | Rs2CL2052s | 74.78 | - | 1456 | 2   | 1456 | Rsa1.0_00592.1 | 73788  | 20106  | 21723  | 99.6  | 99.9  | 111.2 |
| R4 | RGC10110c  | 75.04 |   |      |     |      |                |        |        |        |       |       |       |
| R4 | RGB10350c  | 75.04 | + | 488  | 0   | 488  | Rsa1.0_00906.1 | 178966 | 137182 | 137670 | 100.0 | 100.0 | 100.0 |
| R4 | RGC13794c  | 75.04 | - | 448  | 0   | 413  | Rsa1.0_02574.1 | 29954  | 12820  | 13233  | 55.4  | 92.2  | 100.0 |
| R4 | RGC2328c   | 75.04 | - | 403  | 0   | 403  |                | 88681  | 14804  | 15207  | 100.0 | 100.0 | 100.0 |
| R4 | RGC2715c   | 75.04 | - | 445  | 0   | 445  | Rsa1.0_00057.1 | 160473 | 146989 | 147434 | 99.1  | 100.0 | 100.0 |
| R4 | RGC3886c   | 75.04 | + | 402  | 182 | 402  | Rsa1.0_01598.1 | 42553  | 15173  | 15393  | 54.7  | 54.7  | 100.0 |
| R4 | RGC7139c   | 75.04 | + | 448  | 0   | 448  | Rsa1.0_02857.1 | 27254  | 13638  | 14086  | 100.0 | 100.0 | 100.0 |
| R4 | RGC8082c   | 75.04 | - | 472  | 0   | 472  | Rsa1.0_00852.1 | 62179  | 53321  | 53793  | 100.0 | 100.0 | 100.0 |
| R4 | RS2CL713s  | 75.22 | + | 937  | 0   | 688  | Rsa1.0_03681.1 | 21405  | 665    | 1350   | 72.8  | 73.4  | 99.6  |
| R4 | RS2CL6965s | 75.46 | - | 786  | 1   | 786  | Rsa1.0_01205.1 | 50795  | 8543   | 9329   | 94.5  | 99.9  | 100.1 |
| R4 | RS2CL2947s | 75.76 | + | 1114 | 0   | 1114 | Rsa1.0_01071.1 | 166914 | 14041  | 16450  | 99.7  | 100.0 | 216.3 |
| R4 | RS2CL2388s | 76.25 | - | 1434 | 0   | 1434 | Rsa1.0_00852.1 | 62179  | 27332  | 28823  | 92.1  | 100.0 | 104.0 |
| R4 | RGC9337c   | 76.67 | + | 460  | 0   | 460  | Rsa1.0_01989.1 | 36439  | 22682  | 23142  | 100.0 | 100.0 | 100.0 |
| R4 | RGC3045c   | 77.19 | - | 469  | 0   | 469  | Rsa1.0_00520.1 | 78226  | 15274  | 15743  | 100.0 | 100.0 | 100.0 |

|    |            |       |   |      |    |      |                |        |        |        |       |       |       |
|----|------------|-------|---|------|----|------|----------------|--------|--------|--------|-------|-------|-------|
| R4 | RGC8922c   | 77.19 | - | 458  | 0  | 458  | Rsa1.0_00210.1 | 108424 | 21919  | 22377  | 100.0 | 100.0 | 100.0 |
| R4 | RS2CL6195s | 77.6  | - | 757  | 0  | 756  | Rsa1.0_00520.1 | 78226  | 19413  | 20171  | 98.9  | 99.9  | 100.3 |
| R4 | RS2CL5121s | 78.06 | - | 939  | 1  | 939  | Rsa1.0_01287.1 | 49195  | 2347   | 3349   | 99.6  | 99.9  | 106.8 |
| R4 | RSS3739    | 78.06 | - | 844  | 0  | 844  | Rsa1.0_00350.1 | 92346  | 47201  | 48635  | 97.6  | 100.0 | 169.9 |
| R4 | RGC15937c  | 78.59 | - | 576  | 0  | 576  | Rsa1.0_19177.1 | 1469   | 473    | 1049   | 100.0 | 100.0 | 100.0 |
| R4 | RGC2894c   | 78.59 | - | 548  | 0  | 548  | Rsa1.0_00260.1 | 102021 | 69750  | 70298  | 100.0 | 100.0 | 100.0 |
| R4 | RGC364c    | 78.59 | - | 430  | 0  | 430  | Rsa1.0_00350.1 | 92346  | 22423  | 22853  | 55.6  | 100.0 | 100.0 |
| R4 | RGC6719c   | 78.59 | - | 431  | 0  | 431  | Rsa1.0_02746.1 | 28256  | 20796  | 21227  | 100.0 | 100.0 | 100.0 |
| R4 | RGC6966c   | 78.59 | - | 400  | 0  | 400  | Rsa1.0_01361.1 | 47226  | 30750  | 31150  | 100.0 | 100.0 | 100.0 |
| R4 | RGB7858c   | 78.59 | + | 420  | 0  | 420  | Rsa1.0_01083.1 | 54617  | 18966  | 19386  | 100.0 | 100.0 | 100.0 |
| R4 | RGC4610c   | 78.64 | + | 425  | 0  | 425  | Rsa1.0_01778.1 | 39509  | 10035  | 10460  | 93.9  | 100.0 | 100.0 |
| R4 | RS2CL4033s | 79.02 | + | 815  | 13 | 815  | Rsa1.0_01302.1 | 48907  | 47055  | 47869  | 94.1  | 98.4  | 101.5 |
| R4 | CD63H      | 79.42 |   |      |    |      |                |        |        |        |       |       |       |
| R4 | RS2CL5842s | 79.52 | + | 1117 | 6  | 1117 | Rsa1.0_00802.1 | 63846  | 56789  | 58273  | 88.5  | 99.5  | 133.6 |
| R4 | RGC12174c  | 79.74 | + | 473  | 0  | 473  | Rsa1.0_03048.1 | 25777  | 10535  | 11008  | 100.0 | 100.0 | 100.0 |
| R4 | RSS2079    | 80.1  | - | 873  | 0  | 873  | Rsa1.0_00350.1 | 92346  | 79679  | 81232  | 98.2  | 100.0 | 177.9 |
| R4 | RGB11177c  | 80.11 | + | 453  | 0  | 453  | Rsa1.0_00516.1 | 78417  | 39967  | 40420  | 100.0 | 100.0 | 100.0 |
| R4 | RSS0347    | 80.49 | - | 797  | 0  | 797  | Rsa1.0_00427.1 | 189678 | 33179  | 34321  | 100.0 | 100.0 | 143.3 |
| R4 | RS2CL3470s | 80.8  | + | 1428 | 0  | 1427 | Rsa1.0_00516.1 | 78417  | 39526  | 41107  | 97.9  | 99.9  | 110.8 |
| R4 | RGC2472c   | 81.04 | - | 568  | 0  | 568  | Rsa1.0_00290.1 | 225096 | 158409 | 158977 | 100.0 | 100.0 | 100.0 |
| R4 | Rs2CL2508s | 81.4  | + | 435  | 0  | 429  | Rsa1.0_00516.1 | 78417  | 19865  | 20386  | 95.9  | 98.6  | 121.5 |
| R4 | CC15       | 81.96 |   |      |    |      |                |        |        |        |       |       |       |
| R4 | OPE01      | 82.76 |   |      |    |      |                |        |        |        |       |       |       |
| R4 | RSS1284    | 83.86 | + | 484  | 0  | 484  | Rsa1.0_00126.1 | 127534 | 94230  | 94714  | 75.6  | 100.0 | 100.0 |
| R4 | RS2CL1961s | 84.09 | + | 1100 | 1  | 1095 | Rsa1.0_00350.1 | 92346  | 79571  | 81287  | 92.6  | 99.5  | 156.9 |
| R4 | CC89       | 84.65 |   |      |    |      |                |        |        |        |       |       |       |
| R4 | RS2CL4014s | 85.38 | + | 962  | 4  | 959  | Rsa1.0_00401.1 | 244410 | 178051 | 179385 | 96.8  | 99.3  | 139.7 |
| R4 | RSS3847    | 85.63 | - | 860  | 0  | 783  | Rsa1.0_07855.1 | 8417   | 106    | 1233   | 90.6  | 91.1  | 143.9 |
| R4 | RGC15702c  | 85.89 | + | 583  | 0  | 583  | Rsa1.0_02125.1 | 34775  | 17676  | 18259  | 93.5  | 100.0 | 100.0 |
| R4 | RSS1710    | 86.62 | + | 558  | 0  | 558  | Rsa1.0_00229.1 | 105471 | 39470  | 40028  | 100.0 | 100.0 | 100.0 |
| R4 | RSS3515    | 87.12 | - | 821  | 0  | 821  | Rsa1.0_04646.1 | 16541  | 1433   | 2723   | 99.6  | 100.0 | 157.1 |
| R4 | RS2CL3313s | 88.51 | + | 1267 | 5  | 1267 | Rsa1.0_04266.1 | 18195  | 4593   | 6034   | 91.6  | 99.6  | 114.2 |
| R4 | RGC24823c  | 88.69 | + | 461  | 0  | 461  | Rsa1.0_02518.1 | 30586  | 16267  | 16728  | 100.0 | 100.0 | 100.0 |
| R4 | RGC6716c   | 88.69 | - | 422  | 0  | 422  | Rsa1.0_00140.1 | 121541 | 90036  | 90458  | 100.0 | 100.0 | 100.0 |
| R4 | RSS3297    | 89.19 | - | 509  | 0  | 509  | Rsa1.0_00122.1 | 265937 | 224826 | 225335 | 99.6  | 100.0 | 100.0 |
| R4 | RGC32186c  | 89.65 | + | 402  | 0  | 402  | Rsa1.0_02367.1 | 32106  | 17906  | 18307  | 90.3  | 100.0 | 99.8  |

|    |            |        |   |      |     |      |                |        |        |        |       |       |       |
|----|------------|--------|---|------|-----|------|----------------|--------|--------|--------|-------|-------|-------|
| R4 | RGB520c    | 90.52  | - | 496  | 0   | 496  | Rsa1.0_00076.1 | 146021 | 107386 | 107882 | 100.0 | 100.0 | 100.0 |
| R4 | CA98       | 90.86  |   |      |     |      |                |        |        |        |       |       |       |
| R4 | RGB14019c  | 91.07  | + | 431  | 0   | 431  | Rsa1.0_01339.1 | 47813  | 6038   | 6500   | 99.8  | 100.0 | 107.2 |
| R4 | RSS3234    | 91.65  | - | 785  | 0   | 785  | Rsa1.0_00013.1 | 292129 | 155049 | 156057 | 61.9  | 100.0 | 128.4 |
| R4 | RSS1064    | 91.85  | + | 829  | 0   | 715  | Rsa1.0_00013.1 | 292129 | 154649 | 155587 | 86.3  | 86.3  | 131.2 |
| R4 | RGC27467c  | 92.02  | - | 436  | 0   | 436  | Rsa1.0_01990.1 | 36431  | 24325  | 24761  | 100.0 | 100.0 | 100.0 |
| R4 | RGC2779c   | 92.02  | + | 407  | 0   | 407  | Rsa1.0_00013.1 | 292129 | 134615 | 135022 | 100.0 | 100.0 | 100.0 |
| R4 | RGC5481c   | 92.02  | + | 457  | 0   | 457  | Rsa1.0_00477.1 | 81556  | 21597  | 22054  | 92.8  | 100.0 | 100.0 |
| R4 | RGC206c    | 92.28  | + | 425  | 0   | 425  | Rsa1.0_03007.1 | 26070  | 17568  | 17993  | 100.0 | 100.0 | 100.0 |
| R4 | RGC2343c   | 92.28  | + | 421  | 0   | 421  | Rsa1.0_01144.1 | 52431  | 21023  | 21444  | 100.0 | 100.0 | 100.0 |
| R4 | RGC2932c   | 92.28  | - | 545  | 0   | 545  | Rsa1.0_01027.1 | 56402  | 7812   | 8357   | 100.0 | 100.0 | 100.0 |
| R4 | RS2CL6948s | 92.3   | + | 606  | 1   | 591  | Rsa1.0_00581.1 | 163575 | 26286  | 28062  | 88.3  | 97.4  | 301.0 |
| R4 | RSS2397    | 92.42  | - | 208  | 0   | 208  | Rsa1.0_00013.1 | 292129 | 120586 | 120794 | 100.0 | 100.0 | 100.0 |
| R4 | RS2CL4453s | 93.08  | + | 786  | 0   | 784  | Rsa1.0_00013.1 | 292129 | 191217 | 192404 | 98.6  | 99.8  | 151.4 |
| R4 | RGC13764c  | 93.44  | + | 421  | 0   | 421  | Rsa1.0_00752.1 | 65756  | 11770  | 12191  | 100.0 | 100.0 | 100.0 |
| R4 | RS2CL3226s | 94.1   | - | 752  | 0   | 752  | Rsa1.0_08151.1 | 7830   | 2088   | 2845   | 98.7  | 100.0 | 100.7 |
| R4 | RGC139c    | 94.27  | + | 432  | 0   | 432  | Rsa1.0_01936.1 | 37151  | 23667  | 24099  | 100.0 | 100.0 | 100.0 |
| R4 | RSS0625    | 94.3   | + | 251  | 0   | 251  | Rsa1.0_04617.1 | 16625  | 15282  | 15546  | 95.6  | 100.0 | 105.2 |
| R4 | RSS1628    | 94.3   | - | 865  | 0   | 865  | Rsa1.0_04617.1 | 16625  | 15384  | 16269  | 93.9  | 100.0 | 102.3 |
| R4 | RSS2491    | 94.3   | + | 674  | 0   | 674  | Rsa1.0_00477.1 | 81556  | 13737  | 14544  | 93.6  | 100.0 | 119.7 |
| R4 | RSS3741    | 94.3   | - | 516  | 2   | 516  | Rsa1.0_00477.1 | 81556  | 10595  | 11407  | 92.1  | 99.6  | 158.0 |
| R4 | RGC1537c   | 94.36  | - | 421  | 0   | 421  |                | 390088 | 77935  | 78356  | 100.0 | 100.0 | 100.0 |
| R4 | RGC6353c   | 94.36  | - | 502  | 149 | 502  |                | 188018 | 2603   | 2956   | 70.3  | 70.3  | 100.0 |
| R4 | RS2CL6090s | 94.57  | + | 678  | 22  | 678  | Rsa1.0_16231.1 | 131890 | 0      | 764    | 91.9  | 96.8  | 116.5 |
| R4 | RS2CL2598s | 94.76  | + | 783  | 2   | 783  | Rsa1.0_06619.1 | 10650  | 527    | 1475   | 94.6  | 99.7  | 121.4 |
| R4 | RS2CL6646s | 94.86  | - | 1049 | 1   | 1047 | Rsa1.0_00013.1 | 292129 | 15338  | 16888  | 96.4  | 99.7  | 148.2 |
| R4 | RS2CL5488s | 94.98  | + | 1194 | 2   | 1194 | Rsa1.0_00013.1 | 292129 | 114305 | 116481 | 99.3  | 99.8  | 182.6 |
| R4 | RS2CL8917s | 95.07  | - | 733  | 6   | 733  | Rsa1.0_00370.1 | 90472  | 43128  | 43876  | 96.2  | 99.2  | 102.9 |
| R4 | Rs2CL1743s | 95.16  | - | 1612 | 0   | 1609 | Rsa1.0_01144.1 | 52431  | 39379  | 42732  | 66.8  | 99.8  | 208.4 |
| R4 | RSS0393    | 95.22  | + | 708  | 0   | 708  | Rsa1.0_03436.1 | 22958  | 18416  | 19124  | 94.1  | 100.0 | 100.0 |
| R4 | RSS0341    | 95.82  | + | 828  | 0   | 828  |                | 40243  | 5200   | 6833   | 98.7  | 100.0 | 197.2 |
| R4 | RSS2667    | 95.82  | + | 824  | 45  | 824  | Rsa1.0_00385.1 | 89160  | 81269  | 82755  | 86.0  | 94.5  | 190.8 |
| R4 | CC43b      | 96.52  |   |      |     |      |                |        |        |        |       |       |       |
| R4 | RSS3109    | 97.62  | + | 863  | 0   | 860  | Rsa1.0_00385.1 | 89160  | 47404  | 48348  | 98.5  | 99.7  | 109.8 |
| R4 | CA15       | 99.42  |   |      |     |      |                |        |        |        |       |       |       |
| R4 | RS2CL3689s | 100.43 | + | 802  | 8   | 792  | Rsa1.0_01144.1 | 52431  | 22887  | 24462  | 93.3  | 97.8  | 200.9 |

|    |            |        |   |      |   |      |                |        |        |        |       |       |       |
|----|------------|--------|---|------|---|------|----------------|--------|--------|--------|-------|-------|-------|
| R4 | RGA1556s   | 100.61 |   |      |   |      |                |        |        |        |       |       |       |
| R4 | RS2CL2599s | 100.81 | - | 1222 | 2 | 1190 | Rsa1.0_02907.1 | 26861  | 15222  | 16610  | 82.3  | 97.2  | 116.8 |
| R4 | RSS2245    | 101.28 | - | 847  | 0 | 847  | Rsa1.0_00407.1 | 191544 | 155701 | 156635 | 100.0 | 100.0 | 110.3 |
| R4 | RS2CL2069s | 101.29 | + | 953  | 4 | 952  |                | 390088 | 5959   | 7451   | 75.5  | 99.5  | 157.4 |
| R4 | RS2CL6037s | 101.56 | + | 1013 | 0 | 1013 |                | 390088 | 55219  | 56497  | 90.4  | 100.0 | 126.2 |
| R4 | RS2CL4491s | 102.02 | - | 1121 | 0 | 1120 | Rsa1.0_00159.1 | 431686 | 407496 | 408969 | 97.2  | 99.9  | 131.5 |
| R4 | RGC16154c  | 102.46 | + | 466  | 0 | 466  |                | 390088 | 177718 | 178184 | 100.0 | 100.0 | 100.0 |
| R4 | RGC19350c  | 102.46 | - | 421  | 0 | 421  |                | 390088 | 141848 | 142269 | 100.0 | 100.0 | 100.0 |
| R4 | RGC9063c   | 102.46 | - | 478  | 0 | 478  | Rsa1.0_03504.1 | 22443  | 8297   | 8775   | 100.0 | 100.0 | 100.0 |
| R4 | RS2CL3466s | 102.69 | + | 1590 | 2 | 1586 |                | 390088 | 59689  | 61436  | 95.8  | 99.6  | 110.3 |
| R4 | Rs2CL2383s | 103.26 | + | 623  | 0 | 622  |                | 390088 | 320345 | 321331 | 99.8  | 99.8  | 158.5 |
| R4 | RSS3247    | 103.38 | + | 755  | 3 | 755  | Rsa1.0_01254.1 | 49801  | 13792  | 14998  | 99.6  | 99.6  | 160.4 |
| R4 | RS2CL3308s | 103.73 | + | 863  | 2 | 863  |                | 390088 | 380683 | 381776 | 98.6  | 99.8  | 127.0 |
| R4 | RS2CL2278s | 104.72 | - | 1064 | 2 | 1064 | Rsa1.0_07208.1 | 9719   | 7728   | 9009   | 93.8  | 99.8  | 120.6 |
| R4 | RS2CL8405s | 105.31 | - | 887  | 2 | 887  | Rsa1.0_02803.1 | 27715  | 17271  | 18452  | 98.1  | 99.8  | 133.5 |
| R4 | CC56a      | 105.59 |   |      |   |      |                |        |        |        |       |       |       |
| R4 | RS2CL6277s | 106.41 | + | 619  | 1 | 619  | Rsa1.0_00498.1 | 79746  | 48401  | 49900  | 97.6  | 99.8  | 242.6 |
| R4 | RS2CL3794s | 106.71 | - | 991  | 5 | 958  | Rsa1.0_00788.1 | 64237  | 58539  | 59946  | 83.4  | 96.2  | 147.6 |
| R4 | CD24       | 107.49 |   |      |   |      |                |        |        |        |       |       |       |
| R4 | RS2CL2462s | 107.89 | - | 623  | 3 | 623  | Rsa1.0_15127.1 | 2809   | 1503   | 2425   | 98.9  | 99.5  | 148.7 |
| R4 | RS2CL4251s | 107.91 | - | 879  | 0 | 879  | Rsa1.0_01061.1 | 55349  | 21837  | 22983  | 98.1  | 100.0 | 130.4 |
| R4 | RGC17710c  | 108.16 | - | 522  | 0 | 522  | Rsa1.0_01154.1 | 52249  | 49615  | 50136  | 88.9  | 100.0 | 99.8  |
| R4 | RGC16310c  | 108.21 | + | 412  | 0 | 412  | Rsa1.0_00328.1 | 224661 | 185668 | 186080 | 100.0 | 100.0 | 100.0 |
| R4 | RGC2194c   | 108.21 | + | 451  | 0 | 451  | Rsa1.0_01413.1 | 46275  | 6310   | 6761   | 100.0 | 100.0 | 100.0 |
| R4 | RGC2833c   | 108.21 | - | 477  | 0 | 477  | Rsa1.0_00788.1 | 64237  | 49407  | 49884  | 87.4  | 100.0 | 100.0 |
| R4 | RGC4391c   | 108.21 | + | 493  | 0 | 493  | Rsa1.0_00498.1 | 79746  | 25957  | 26450  | 100.0 | 100.0 | 100.0 |
| R4 | RGC5031c   | 108.21 | - | 509  | 0 | 509  | Rsa1.0_07208.1 | 9719   | 5945   | 6454   | 100.0 | 100.0 | 100.0 |
| R4 | RGC6220c   | 108.21 | + | 450  | 0 | 450  | Rsa1.0_03437.1 | 22947  | 16801  | 17251  | 100.0 | 100.0 | 100.0 |
| R4 | RS2CL2730s | 108.25 | + | 1237 | 3 | 1235 | Rsa1.0_00328.1 | 224661 | 135239 | 137083 | 95.7  | 99.6  | 149.7 |
| R4 | RS2CL6009s | 108.46 | + | 1389 | 2 | 1389 | Rsa1.0_01061.1 | 55349  | 15445  | 17769  | 96.4  | 99.9  | 167.6 |
| R4 | RS2CL1897s | 108.78 | + | 734  | 0 | 694  | Rsa1.0_01154.1 | 52249  | 37203  | 38568  | 71.8  | 94.6  | 196.7 |
| R4 | RS2CL5094s | 109.2  | + | 1151 | 2 | 1151 | Rsa1.0_01118.1 | 53460  | 1850   | 3244   | 89.8  | 99.8  | 121.3 |
| R4 | RGC9763c   | 109.49 | - | 467  | 0 | 467  | Rsa1.0_04203.1 | 18479  | 5357   | 5824   | 100.0 | 100.0 | 100.0 |
| R4 | RSS3305    | 109.57 | + | 826  | 0 | 826  | Rsa1.0_02432.1 | 31499  | 17554  | 18575  | 99.8  | 100.0 | 123.6 |
| R4 | RGC2574c   | 109.94 | + | 430  | 0 | 430  | Rsa1.0_01930.1 | 37189  | 18509  | 18939  | 85.1  | 100.0 | 100.0 |
| R4 | RS2CL1636s | 110.31 | - | 749  | 2 | 749  | Rsa1.0_01200.1 | 50895  | 30781  | 31941  | 92.3  | 99.7  | 155.3 |





|    |            |        |   |      |     |      |                |        |        |        |       |       |       |
|----|------------|--------|---|------|-----|------|----------------|--------|--------|--------|-------|-------|-------|
| R4 | RS2CL2532s | 129.29 | - | 817  | 0   | 817  | Rsa1.0_00836.1 | 185968 | 182124 | 183567 | 95.5  | 100.0 | 176.6 |
| R4 | RS2CL7410s | 129.43 | - | 646  | 3   | 642  | Rsa1.0_01514.1 | 44222  | 4068   | 4695   | 96.4  | 98.9  | 98.1  |
| R4 | RS2CL6216s | 129.9  | - | 970  | 6   | 970  | Rsa1.0_00836.1 | 185968 | 17828  | 19202  | 93.8  | 99.4  | 142.5 |
| R4 | RSS2818    | 130.28 | - | 842  | 0   | 842  |                | 48033  | 42387  | 43231  | 100.0 | 100.0 | 100.2 |
| R4 | RGC12577c  | 130.65 |   |      |     |      |                |        |        |        |       |       |       |
| R4 | RGC12869c  | 130.65 |   |      |     |      |                |        |        |        |       |       |       |
| R4 | RGC2383c   | 130.65 | + | 555  | 0   | 555  | Rsa1.0_00313.1 | 96745  | 79841  | 80396  | 95.0  | 100.0 | 100.0 |
| R4 | RGC6866c   | 130.65 | - | 447  | 0   | 447  | Rsa1.0_02160.1 | 34468  | 3507   | 3954   | 100.0 | 100.0 | 100.0 |
| R4 | RGC8508c   | 130.65 | + | 525  | 0   | 392  | Rsa1.0_01366.1 | 47139  | 28112  | 28504  | 51.8  | 74.7  | 100.0 |
| R4 | RS2CL1846s | 130.8  | - | 623  | 2   | 622  | Rsa1.0_01065.1 | 55264  | 30933  | 32367  | 74.5  | 99.5  | 231.3 |
| R4 | CA35b      | 130.81 |   |      |     |      |                |        |        |        |       |       |       |
| R4 | RS2CL2717s | 131.12 | - | 918  | 2   | 831  | Rsa1.0_00847.1 | 62270  | 54052  | 55578  | 87.5  | 90.3  | 184.1 |
| R4 | RSS3394    | 131.17 | - | 845  | 155 | 845  | Rsa1.0_00364.1 | 90951  | 5906   | 6723   | 79.8  | 81.7  | 118.4 |
| R4 | RSS3897    | 131.17 | + | 537  | 0   | 537  | Rsa1.0_01384.1 | 46803  | 32825  | 34016  | 49.5  | 100.0 | 221.8 |
| R4 | RS2CL1003s | 131.21 | - | 892  | 5   | 892  | Rsa1.0_04785.1 | 15993  | 7242   | 8743   | 95.6  | 99.4  | 169.2 |
| R4 | RS2CL1386s | 131.67 | - | 1165 | 2   | 1164 | Rsa1.0_00227.1 | 105849 | 102220 | 104784 | 94.4  | 99.7  | 220.7 |
| R4 | RS2CL4891s | 131.97 | - | 1341 | 2   | 1341 | Rsa1.0_02459.1 | 31185  | 18210  | 20256  | 92.1  | 99.9  | 152.8 |
| R4 | RSS0649    | 132.1  | - | 651  | 1   | 651  | Rsa1.0_03028.1 | 25872  | 20810  | 22684  | 95.2  | 99.9  | 288.3 |
| R4 | RSS0371    | 132.6  | - | 635  | 0   | 635  | Rsa1.0_03194.1 | 24674  | 2759   | 3496   | 93.5  | 100.0 | 116.1 |
| R4 | RS2CL4267s | 133.5  | + | 775  | 3   | 775  | Rsa1.0_01157.1 | 52121  | 44784  | 45562  | 78.1  | 99.6  | 100.8 |
| R4 | RSS2126    | 134.1  | + | 830  | 0   | 830  | Rsa1.0_00422.1 | 86144  | 34812  | 35643  | 99.3  | 100.0 | 100.1 |
| R4 | RSS0912    | 134.5  | + | 285  | 13  | 271  | Rsa1.0_01555.1 | 166456 | 17908  | 18260  | 88.1  | 90.5  | 136.4 |
| R4 | RS2CL2291s | 134.57 | + | 1047 | 3   | 1047 | Rsa1.0_04235.1 | 18373  | 11397  | 12739  | 97.5  | 99.7  | 128.5 |
| R4 | RS2CL2308s | 135.38 | + | 721  | 1   | 719  | Rsa1.0_09709.1 | 6198   | 2932   | 3656   | 99.0  | 99.6  | 100.8 |
| R4 | RGC151c    | 135.73 | + | 420  | 0   | 420  | Rsa1.0_00645.1 | 189716 | 11058  | 11478  | 100.0 | 100.0 | 100.0 |
| R4 | RGC16913c  | 135.73 | - | 472  | 0   | 472  | Rsa1.0_00554.1 | 150953 | 121061 | 121533 | 100.0 | 100.0 | 100.0 |
| R4 | RGC4940c   | 135.73 | + | 522  | 0   | 522  | Rsa1.0_00031.1 | 179862 | 85292  | 85814  | 93.7  | 100.0 | 100.0 |
| R4 | RGC7607c   | 135.73 | + | 437  | 0   | 437  | Rsa1.0_00031.1 | 179862 | 161066 | 161559 | 100.0 | 100.0 | 112.8 |
| R4 | CC79       | 135.87 |   |      |     |      |                |        |        |        |       |       |       |
| R4 | RS2CL5873s | 136.57 | + | 1011 | 1   | 1010 | Rsa1.0_00031.1 | 179862 | 166009 | 167292 | 99.5  | 99.8  | 127.2 |
| R4 | RSS1537    | 136.72 | - | 812  | 0   | 812  | Rsa1.0_01489.1 | 44764  | 885    | 1995   | 100.0 | 100.0 | 136.7 |
| R4 | RGC10060c  | 137.23 | + | 447  | 0   | 447  | Rsa1.0_03733.1 | 21108  | 1634   | 2081   | 100.0 | 100.0 | 100.0 |
| R4 | RS2CL2821s | 137.64 | - | 1169 | 0   | 1167 | Rsa1.0_00270.1 | 101236 | 40699  | 41940  | 79.2  | 99.8  | 106.3 |
| R4 | OPT16a     | 138.02 |   |      |     |      |                |        |        |        |       |       |       |
| R4 | RGA1700s   | 138.08 |   |      |     |      |                |        |        |        |       |       |       |
| R4 | Rs2CL2077s | 138.8  | - | 661  | 3   | 653  | Rsa1.0_04073.1 | 19238  | 15161  | 16112  | 94.7  | 98.3  | 146.3 |

|    |            |        |   |      |     |      |                |        |        |        |       |       |       |
|----|------------|--------|---|------|-----|------|----------------|--------|--------|--------|-------|-------|-------|
| R4 | RS2CL1358s | 140.21 | - | 696  | 3   | 694  | Rsa1.0_00270.1 | 101236 | 23111  | 24645  | 93.1  | 99.3  | 222.0 |
| R4 | RGC2546c   | 141.22 | + | 486  | 0   | 486  | Rsa1.0_00424.1 | 86005  | 77194  | 77680  | 100.0 | 100.0 | 100.0 |
| R4 | RGA125s    | 142.16 |   |      |     |      |                |        |        |        |       |       |       |
| R5 | RSS3015    | 0      | + | 861  | 176 | 861  | Rsa1.0_04026.1 | 19508  | 6450   | 7135   | 51.9  | 79.6  | 100.0 |
| R5 | RSS3061    | 0.3    |   |      |     |      |                |        |        |        |       |       |       |
| R5 | RSS1661    | 0.8    | - | 853  | 0   | 853  | Rsa1.0_07499.1 | 9244   | 5637   | 6863   | 91.3  | 100.0 | 143.7 |
| R5 | RSS3244    | 0.8    | + | 776  | 0   | 776  | Rsa1.0_00055.1 | 520193 | 162514 | 164222 | 94.3  | 100.0 | 220.1 |
| R5 | RSS3245    | 0.8    | - | 439  | 0   | 397  |                | 283362 | 269838 | 270532 | 80.9  | 90.4  | 174.8 |
| R5 | RSS0292    | 1.1    | - | 662  | 0   | 662  | Rsa1.0_03325.1 | 23720  | 16433  | 17382  | 90.6  | 100.0 | 143.4 |
| R5 | CD34bH     | 1.4    |   |      |     |      |                |        |        |        |       |       |       |
| R5 | RSS0017    | 1.6    | + | 728  | 9   | 728  | Rsa1.0_10522.1 | 5816   | 4428   | 5414   | 94.8  | 98.8  | 137.1 |
| R5 | CA74H      | 2      |   |      |     |      |                |        |        |        |       |       |       |
| R5 | RSS1674    | 2.1    | + | 695  | 1   | 695  | Rsa1.0_00179.1 | 393324 | 249543 | 250936 | 65.3  | 99.9  | 200.7 |
| R5 | CD71       | 2.5    |   |      |     |      |                |        |        |        |       |       |       |
| R5 | N97067     | 2.8    |   |      |     |      |                |        |        |        |       |       |       |
| R5 | Rs2CL1745s | 2.81   | + | 729  | 2   | 729  | Rsa1.0_04288.1 | 18077  | 12915  | 14097  | 99.7  | 99.7  | 162.6 |
| R5 | CD20       | 3.1    |   |      |     |      |                |        |        |        |       |       |       |
| R5 | RSS0662_a  | 4      | - | 838  | 0   | 838  |                | 59481  | 8137   | 9280   | 99.4  | 100.0 | 136.4 |
| R5 | RSS1054    | 4.2    |   |      |     |      |                |        |        |        |       |       |       |
| R5 | RSS1457    | 4.6    | - | 838  | 0   | 838  | Rsa1.0_04396.1 | 17561  | 4330   | 5316   | 98.1  | 100.0 | 117.7 |
| R5 | RS2CL8651s | 4.64   | + | 597  | 173 | 597  | Rsa1.0_00703.1 | 67597  | 26997  | 27421  | 69.9  | 71.0  | 100.0 |
| R5 | RSS3450    | 5      |   |      |     |      |                |        |        |        |       |       |       |
| R5 | RSS0662_b  | 5.5    |   |      |     |      |                |        |        |        |       |       |       |
| R5 | RS2CL7919s | 5.86   | + | 481  | 1   | 476  | Rsa1.0_02017.1 | 35999  | 32830  | 33315  | 97.3  | 98.8  | 102.1 |
| R5 | RS2CL6011s | 6.39   | + | 1261 | 48  | 1261 | Rsa1.0_00055.1 | 520193 | 401657 | 403415 | 90.3  | 96.2  | 144.9 |
| R5 | CC37bH     | 6.5    |   |      |     |      |                |        |        |        |       |       |       |
| R5 | RGC1111c   | 7.06   | + | 474  | 0   | 474  | Rsa1.0_00179.1 | 393324 | 205601 | 206075 | 100.0 | 100.0 | 100.0 |
| R5 | RGC1381c   | 7.06   | - | 429  | 0   | 429  | Rsa1.0_00179.1 | 393324 | 365750 | 366179 | 79.0  | 100.0 | 100.0 |
| R5 | RGC21684c  | 7.06   | - | 520  | 0   | 520  | Rsa1.0_00542.1 | 76831  | 19505  | 20025  | 100.0 | 100.0 | 100.0 |
| R5 | RGB964c    | 7.06   | + | 535  | 0   | 535  | Rsa1.0_00542.1 | 76831  | 70503  | 71038  | 99.6  | 100.0 | 100.0 |
| R5 | RS2CL5773s | 7.17   | + | 989  | 1   | 989  | Rsa1.0_06489.1 | 10917  | 3347   | 4436   | 88.0  | 99.9  | 110.2 |
| R5 | RSS2263    | 7.2    | + | 777  | 49  | 777  | Rsa1.0_00977.1 | 198001 | 30168  | 30928  | 86.2  | 93.7  | 104.4 |
| R5 | RS2CL2901s | 7.31   | + | 1689 | 14  | 1685 | Rsa1.0_04364.1 | 17734  | 4249   | 6573   | 70.3  | 98.9  | 139.1 |
| R5 | RS2CL3894s | 7.44   |   |      |     |      |                |        |        |        |       |       |       |
| R5 | RSS1183    | 7.9    | + | 494  | 0   | 494  | Rsa1.0_00977.1 | 198001 | 50820  | 51314  | 100.0 | 100.0 | 100.0 |

|    |            |       |   |      |    |      |                |        |        |        |       |       |       |
|----|------------|-------|---|------|----|------|----------------|--------|--------|--------|-------|-------|-------|
| R5 | RS2CL4044s | 7.95  |   |      |    |      |                |        |        |        |       |       |       |
| R5 | RS2CL5289s | 8.81  | + | 945  | 2  | 944  | Rsa1.0_00179.1 | 393324 | 230333 | 232864 | 67.3  | 99.7  | 268.7 |
| R5 | Rs2CL1517s | 9.19  | + | 855  | 2  | 855  | Rsa1.0_00179.1 | 393324 | 203929 | 205837 | 90.1  | 99.8  | 223.7 |
| R5 | RSS2534    | 9.7   |   |      |    |      |                |        |        |        |       |       |       |
| R5 | RS2CL6910s | 10.05 | - | 764  | 4  | 764  | Rsa1.0_00179.1 | 393324 | 196239 | 197641 | 97.1  | 99.5  | 184.5 |
| R5 | RS2CL2032s | 11.89 | - | 806  | 3  | 806  | Rsa1.0_01206.1 | 50772  | 39547  | 41243  | 98.1  | 99.6  | 211.2 |
| R5 | RSS0922    | 11.9  |   |      |    |      |                |        |        |        |       |       |       |
| R5 | Pf         | 12.7  |   |      |    |      |                |        |        |        |       |       |       |
| R5 | RGB2724c   | 12.95 | + | 492  | 0  | 492  | Rsa1.0_00642.1 | 201230 | 164830 | 165322 | 100.0 | 100.0 | 100.0 |
| R5 | RS2CL4777s | 13.68 |   |      |    |      |                |        |        |        |       |       |       |
| R5 | RGC20584c  | 13.86 | - | 420  | 0  | 420  | Rsa1.0_02628.1 | 29369  | 27144  | 27564  | 100.0 | 100.0 | 100.0 |
| R5 | RS2CL7144s | 14.51 | + | 608  | 6  | 608  | Rsa1.0_01603.1 | 42468  | 8935   | 9536   | 97.5  | 99.0  | 99.8  |
| R5 | RSS1319    | 15    | - | 724  | 7  | 723  | Rsa1.0_13800.1 | 4315   | 2319   | 3386   | 92.1  | 98.9  | 149.0 |
| R5 | RSS3682    | 15.7  |   |      |    |      |                |        |        |        |       |       |       |
| R5 | Rs2CL2150s | 16.48 | - | 510  | 2  | 510  | Rsa1.0_05572.1 | 13291  | 11314  | 12104  | 94.1  | 99.6  | 155.5 |
| R5 | RSS1795    | 17.9  | - | 562  | 0  | 562  | Rsa1.0_03782.1 | 20891  | 13576  | 14225  | 97.5  | 100.0 | 115.5 |
| R5 | Rs2CL2167s | 18.29 | - | 800  | 1  | 800  | Rsa1.0_06136.1 | 11659  | 1334   | 2544   | 97.8  | 99.9  | 151.4 |
| R5 | RSS2289    | 18.6  | + | 886  | 0  | 886  | Rsa1.0_00130.1 | 125737 | 115183 | 117108 | 92.1  | 100.0 | 217.3 |
| R5 | RSS0310    | 18.8  | - | 798  | 1  | 798  | Rsa1.0_00130.1 | 125737 | 116623 | 118143 | 91.0  | 99.9  | 190.7 |
| R5 | RSS2078_a  | 19.7  | + | 821  | 20 | 810  |                | 240912 | 223707 | 225014 | 90.3  | 96.2  | 165.4 |
| R5 | RSS2459    | 20.3  | - | 719  | 0  | 719  | Rsa1.0_00913.1 | 59914  | 54249  | 55221  | 90.0  | 100.0 | 135.2 |
| R5 | RSS1155    | 20.5  | + | 810  | 0  | 810  | Rsa1.0_09141.1 | 6612   | 672    | 2389   | 100.0 | 100.0 | 212.0 |
| R5 | RS2CL2345s | 20.91 |   |      |    |      |                |        |        |        |       |       |       |
| R5 | Rs2CL1650s | 21.12 |   |      |    |      |                |        |        |        |       |       |       |
| R5 | RSS0255    | 21.5  | + | 767  | 0  | 767  | Rsa1.0_03005.1 | 26082  | 7789   | 8938   | 99.2  | 100.0 | 149.8 |
| R5 | RS2CL4383s | 21.86 | + | 709  | 0  | 708  | Rsa1.0_03759.1 | 20987  | 15444  | 16156  | 97.9  | 99.9  | 100.6 |
| R5 | RS2CL4098s | 22.38 | + | 1275 | 1  | 1275 | Rsa1.0_00130.1 | 125737 | 52565  | 55020  | 98.4  | 99.9  | 192.7 |
| R5 | RGA1775s   | 22.64 |   |      |    |      |                |        |        |        |       |       |       |
| R5 | RSS1293    | 22.7  | - | 459  | 1  | 459  | Rsa1.0_00632.1 | 183777 | 638    | 1205   | 99.6  | 99.8  | 123.8 |
| R5 | RSS2428    | 22.7  | + | 384  | 6  | 384  | Rsa1.0_08203.1 | 7742   | 5070   | 5547   | 95.8  | 98.4  | 126.2 |
| R5 | RSS1421    | 23    | + | 616  | 0  | 616  | Rsa1.0_00632.1 | 183777 | 55991  | 60779  | 94.0  | 100.0 | 777.3 |
| R5 | RSS2179    | 23.4  | + | 833  | 0  | 833  | Rsa1.0_00632.1 | 183777 | 145494 | 146327 | 100.0 | 100.0 | 100.0 |
| R5 | RSS1445    | 23.6  | - | 815  | 0  | 815  | Rsa1.0_00632.1 | 183777 | 176179 | 176994 | 95.7  | 100.0 | 100.0 |
| R5 | RSS0020    | 24.1  | + | 798  | 0  | 798  | Rsa1.0_00098.1 | 349239 | 232345 | 233312 | 95.1  | 100.0 | 121.2 |
| R5 | RS2CL6459s | 24.65 | + | 916  | 2  | 916  | Rsa1.0_04544.1 | 16917  | 12702  | 13615  | 97.9  | 99.8  | 99.9  |
| R5 | RSS0640    | 25.1  | + | 395  | 13 | 395  | Rsa1.0_02592.1 | 29751  | 6020   | 6404   | 92.9  | 96.7  | 100.5 |



|    |            |       |   |      |    |      |                |        |        |        |       |       |       |
|----|------------|-------|---|------|----|------|----------------|--------|--------|--------|-------|-------|-------|
| R5 | RSS2660    | 40.2  | + | 862  | 0  | 862  | Rsa1.0_03016.1 | 26000  | 1173   | 2723   | 98.8  | 100.0 | 179.8 |
| R5 | RSS0609    | 40.3  | - | 683  | 0  | 683  | Rsa1.0_03016.1 | 26000  | 2222   | 3601   | 99.4  | 100.0 | 201.9 |
| R5 | RS2CL8976s | 40.42 | - | 698  | 1  | 698  | Rsa1.0_10460.1 | 5842   | 3567   | 4298   | 84.1  | 99.9  | 104.9 |
| R5 | RGB2659c   | 40.99 | + | 506  | 0  | 506  | Rsa1.0_02071.1 | 35409  | 5053   | 5559   | 100.0 | 100.0 | 100.0 |
| R5 | R30624b    | 41.1  |   |      |    |      |                |        |        |        |       |       |       |
| R5 | RGC8374c   | 41.67 | + | 400  | 0  | 400  | Rsa1.0_07592.1 | 9059   | 8023   | 8423   | 83.8  | 100.0 | 100.0 |
| R5 | RSS1763_a  | 42.5  | + | 573  | 0  | 573  | Rsa1.0_04989.1 | 15217  | 1951   | 2779   | 99.8  | 100.0 | 144.5 |
| R5 | CC67bH     | 42.8  |   |      |    |      |                |        |        |        |       |       |       |
| R5 | RS2CL5232s | 42.8  | - | 897  | 12 | 897  | Rsa1.0_02343.1 | 32374  | 8809   | 10166  | 98.6  | 98.7  | 153.3 |
| R5 | RSS0485    | 43.5  |   |      |    |      |                |        |        |        |       |       |       |
| R5 | RGA91s     | 43.58 |   |      |    |      |                |        |        |        |       |       |       |
| R5 | RSS0430_a  | 43.8  | + | 808  | 0  | 808  |                | 12173  | 2326   | 3128   | 97.3  | 100.0 | 99.3  |
| R5 | RGC12639c  | 44.01 | - | 471  | 0  | 471  | Rsa1.0_04298.1 | 147466 | 6676   | 7147   | 100.0 | 100.0 | 100.0 |
| R5 | RGC4480c   | 44.3  |   |      |    |      |                |        |        |        |       |       |       |
| R5 | CD72bH     | 45.1  |   |      |    |      |                |        |        |        |       |       |       |
| R5 | RGC9986c   | 45.6  | + | 457  | 0  | 457  | Rsa1.0_00332.1 | 94575  | 53643  | 54100  | 100.0 | 100.0 | 100.0 |
| R5 | RSS3072    | 46.2  | + | 874  | 0  | 874  | Rsa1.0_00947.1 | 58664  | 47318  | 48610  | 93.3  | 100.0 | 147.8 |
| R5 | RGC17999c  | 46.55 | - | 476  | 0  | 476  | Rsa1.0_00332.1 | 94575  | 39392  | 39868  | 100.0 | 100.0 | 100.0 |
| R5 | RGA1661s   | 47.18 |   |      |    |      |                |        |        |        |       |       |       |
| R5 | RGC9094c   | 47.89 | - | 428  | 0  | 428  | Rsa1.0_01018.1 | 56685  | 21633  | 22061  | 100.0 | 100.0 | 100.0 |
| R5 | RSS2310    | 47.9  | - | 788  | 0  | 788  | Rsa1.0_02314.1 | 32642  | 30106  | 31494  | 100.0 | 100.0 | 176.1 |
| R5 | Rs2CL2263s | 49.11 | + | 833  | 0  | 831  | Rsa1.0_00759.1 | 65465  | 10764  | 12531  | 96.8  | 99.8  | 212.6 |
| R5 | RSS3250    | 49.8  | + | 808  | 0  | 808  | Rsa1.0_02867.1 | 27121  | 9734   | 10535  | 93.1  | 100.0 | 99.1  |
| R5 | RS2CL4099s | 50.48 | + | 808  | 5  | 806  | Rsa1.0_01286.1 | 49209  | 40520  | 41770  | 95.8  | 99.1  | 156.1 |
| R5 | RSS1955    | 50.6  | + | 416  | 0  | 407  | Rsa1.0_01960.1 | 36766  | 7656   | 8444   | 97.6  | 97.8  | 193.6 |
| R5 | RS2CL3592s | 51.19 |   |      |    |      |                |        |        |        |       |       |       |
| R5 | RSS3666    | 52.1  | + | 462  | 0  | 462  | Rsa1.0_15163.1 | 2786   | 2148   | 2607   | 98.3  | 100.0 | 99.4  |
| R5 | RGB19108c  | 52.6  |   |      |    |      |                |        |        |        |       |       |       |
| R5 | RGC347c    | 52.6  | - | 535  | 0  | 535  | Rsa1.0_01249.1 | 188432 | 38816  | 39351  | 69.9  | 100.0 | 100.0 |
| R5 | RGC8606c   | 52.6  | - | 581  | 0  | 581  | Rsa1.0_01249.1 | 188432 | 174779 | 175360 | 86.6  | 100.0 | 100.0 |
| R5 | RS2CL3943s | 53.18 | + | 505  | 2  | 505  | Rsa1.0_05653.1 | 13043  | 9441   | 10445  | 99.0  | 99.6  | 199.6 |
| R5 | CA64       | 54.1  |   |      |    |      |                |        |        |        |       |       |       |
| R5 | RS2CL6006s | 54.22 | + | 1052 | 53 | 1052 | Rsa1.0_01018.1 | 56685  | 10     | 2258   | 94.5  | 95.0  | 225.0 |
| R5 | RSS1195    | 56.1  | - | 503  | 0  | 480  | Rsa1.0_07909.1 | 8315   | 0      | 480    | 95.2  | 95.4  | 100.0 |
| R5 | RGC19763c  | 56.37 | - | 459  | 0  | 459  | Rsa1.0_03861.1 | 20402  | 17871  | 18330  | 100.0 | 100.0 | 100.0 |
| R5 | RSS2188    | 56.5  | + | 590  | 0  | 590  | Rsa1.0_04778.1 | 16010  | 8904   | 9510   | 92.0  | 100.0 | 102.7 |

|    |            |       |   |      |    |      |                |        |        |        |       |       |       |
|----|------------|-------|---|------|----|------|----------------|--------|--------|--------|-------|-------|-------|
| R5 | RSS0574    | 57.4  |   |      |    |      |                |        |        |        |       |       |       |
| R5 | RSS2974    | 57.4  | + | 841  | 0  | 841  | Rsa1.0_14144.1 | 3745   | 859    | 2001   | 97.5  | 100.0 | 135.8 |
| R5 | Rs2CL2589s | 58.74 | + | 950  | 0  | 949  | Rsa1.0_01783.1 | 39383  | 9454   | 11696  | 78.5  | 99.9  | 236.3 |
| R5 | RSS1763    | 59.2  |   |      |    |      |                |        |        |        |       |       |       |
| R5 | RGC6470c   | 59.95 | - | 518  | 0  | 518  | Rsa1.0_01783.1 | 39383  | 9147   | 9665   | 100.0 | 100.0 | 100.0 |
| R5 | RSS0154    | 60.3  | - | 838  | 0  | 838  | Rsa1.0_05707.1 | 12872  | 1347   | 2403   | 100.0 | 100.0 | 126.0 |
| R5 | RS2CL4004s | 60.33 | - | 1136 | 7  | 1124 | Rsa1.0_01034.1 | 56046  | 18566  | 20469  | 95.3  | 98.3  | 170.4 |
| R5 | RSS2249    | 61.2  | - | 853  | 95 | 853  | Rsa1.0_00100.1 | 249232 | 193365 | 194128 | 86.6  | 88.9  | 100.7 |
| R5 | RSS0193    | 61.3  | - | 529  | 0  | 529  | Rsa1.0_00100.1 | 249232 | 193393 | 193920 | 97.0  | 100.0 | 99.6  |
| R5 | CD23       | 61.8  |   |      |    |      |                |        |        |        |       |       |       |
| R5 | CC61H      | 62.8  |   |      |    |      |                |        |        |        |       |       |       |
| R5 | OPR17      | 63.3  |   |      |    |      |                |        |        |        |       |       |       |
| R5 | RGC4546c   | 63.81 | - | 433  | 0  | 433  | Rsa1.0_03462.1 | 22725  | 20272  | 20705  | 100.0 | 100.0 | 100.0 |
| R5 | RSS0866    | 64.18 | - | 656  | 0  | 553  | Rsa1.0_07814.1 | 8487   | 259    | 1368   | 84.3  | 84.3  | 200.5 |
| R5 | RS2CL7551s | 64.45 | - | 840  | 0  | 840  | Rsa1.0_00100.1 | 249232 | 191214 | 192266 | 99.8  | 100.0 | 125.2 |
| R5 | CA66H      | 64.85 |   |      |    |      |                |        |        |        |       |       |       |
| R5 | RGC5978c   | 64.88 | + | 579  | 0  | 579  | Rsa1.0_01803.1 | 173846 | 13565  | 14144  | 100.0 | 100.0 | 100.0 |
| R5 | RGB1306c   | 65.46 | - | 411  | 0  | 411  | Rsa1.0_00324.1 | 218805 | 190019 | 190671 | 99.8  | 100.0 | 158.6 |
| R5 | RSS0068    | 65.49 | - | 841  | 0  | 841  | Rsa1.0_01453.1 | 45449  | 10838  | 12831  | 100.0 | 100.0 | 237.0 |
| R5 | RGC12711c  | 65.74 | + | 430  | 62 | 430  | Rsa1.0_01034.1 | 56046  | 44291  | 44659  | 85.6  | 85.6  | 100.0 |
| R5 | RS2CL1241s | 65.81 | - | 876  | 0  | 875  | Rsa1.0_02040.1 | 35684  | 11985  | 13555  | 95.9  | 99.9  | 179.4 |
| R5 | ACGM16     | 65.98 |   |      |    |      |                |        |        |        |       |       |       |
| R5 | RS2CL3809s | 66.03 | + | 641  | 2  | 641  | Rsa1.0_00447.1 | 84051  | 12844  | 13659  | 99.5  | 99.7  | 127.5 |
| R5 | RGC16642c  | 66.43 | - | 556  | 0  | 556  | Rsa1.0_05766.1 | 12708  | 5905   | 6461   | 88.3  | 100.0 | 100.0 |
| R5 | CD81H      | 66.83 |   |      |    |      |                |        |        |        |       |       |       |
| R5 | RGA1790s   | 67.11 |   |      |    |      |                |        |        |        |       |       |       |
| R5 | RGC21710c  | 67.56 | + | 504  | 0  | 504  |                | 152418 | 148637 | 149141 | 100.0 | 100.0 | 100.0 |
| R5 | CD78       | 67.87 |   |      |    |      |                |        |        |        |       |       |       |
| R5 | RGC5664c   | 67.98 | + | 437  | 0  | 437  | Rsa1.0_01134.1 | 52829  | 23448  | 23885  | 100.0 | 100.0 | 100.0 |
| R5 | RS2CL1583s | 68.25 | + | 1343 | 3  | 1340 |                | 152418 | 110674 | 112729 | 95.5  | 99.6  | 153.7 |
| R5 | RGC948c    | 68.41 | + | 405  | 0  | 405  |                | 247766 | 217646 | 218051 | 100.0 | 100.0 | 100.0 |
| R5 | RSS2089    | 69.01 | + | 455  | 8  | 455  | Rsa1.0_01540.1 | 151890 | 111937 | 112388 | 91.7  | 98.2  | 100.9 |
| R5 | RGC439c    | 69.14 | + | 467  | 0  | 467  | Rsa1.0_03614.1 | 21773  | 10422  | 10889  | 100.0 | 100.0 | 100.0 |
| R5 | RS2CL1103s | 69.16 | + | 1292 | 2  | 1292 | Rsa1.0_00454.1 | 216970 | 212660 | 215026 | 69.1  | 99.9  | 183.4 |
| R5 | RGC14010c  | 69.74 | - | 527  | 0  | 527  | Rsa1.0_00454.1 | 216970 | 158630 | 159157 | 98.5  | 100.0 | 100.0 |
| R5 | RS2CL4593s | 70.03 | - | 1004 | 1  | 1004 | Rsa1.0_01134.1 | 52829  | 18262  | 19953  | 82.6  | 99.9  | 168.6 |

|    |            |       |   |      |     |      |                |        |        |        |       |       |       |
|----|------------|-------|---|------|-----|------|----------------|--------|--------|--------|-------|-------|-------|
| R5 | RSS2970    | 70.12 | + | 804  | 6   | 804  |                | 152418 | 1718   | 2487   | 87.6  | 99.3  | 96.4  |
| R5 | RSS0769    | 70.32 | - | 729  | 129 | 729  |                | 152418 | 11460  | 12415  | 78.6  | 82.3  | 159.2 |
| R5 | RS2CL2778s | 70.36 | - | 882  | 3   | 870  |                | 247766 | 206972 | 208112 | 90.4  | 98.3  | 131.5 |
| R5 | RS2CL4036s | 70.75 |   |      |     |      |                |        |        |        |       |       |       |
| R5 | RSS0295    | 71.17 | - | 739  | 9   | 739  |                | 247766 | 221495 | 222357 | 96.2  | 98.8  | 118.1 |
| R5 | RSS3324    | 71.17 | + | 860  | 0   | 860  | Rsa1.0_02935.1 | 26621  | 6487   | 8342   | 86.4  | 100.0 | 215.7 |
| R5 | RS2CL7602s | 71.33 | - | 797  | 0   | 797  | Rsa1.0_03477.1 | 22635  | 4900   | 5890   | 95.4  | 100.0 | 124.2 |
| R5 | RS2CL3400s | 71.45 | + | 862  | 196 | 861  | Rsa1.0_00745.1 | 66067  | 52614  | 53451  | 60.0  | 77.2  | 125.9 |
| R5 | RSS1246    | 71.94 | - | 428  | 0   | 428  |                | 247766 | 207482 | 208098 | 99.8  | 100.0 | 143.9 |
| R5 | RSS3089    | 73.14 | + | 855  | 0   | 760  |                | 146428 | 127303 | 128155 | 83.0  | 88.9  | 112.1 |
| R5 | RSS3043    | 73.74 |   |      |     |      |                |        |        |        |       |       |       |
| R5 | RSS2679    | 73.84 | + | 751  | 6   | 751  | Rsa1.0_01878.1 | 37768  | 26765  | 27841  | 97.9  | 99.2  | 144.4 |
| R5 | RSS2831    | 74.04 | + | 876  | 0   | 876  | Rsa1.0_00454.1 | 216970 | 155239 | 156567 | 91.3  | 100.0 | 151.6 |
| R5 | RS2CL5573s | 75.09 |   |      |     |      |                |        |        |        |       |       |       |
| R5 | RS2CL8653s | 75.77 | - | 890  | 1   | 890  | Rsa1.0_00833.1 | 62621  | 8599   | 10085  | 96.5  | 99.9  | 167.2 |
| R5 | RGC9734c   | 77.27 | - | 418  | 31  | 418  | Rsa1.0_02411.1 | 31655  | 31157  | 31544  | 92.6  | 92.6  | 100.0 |
| R5 | RGB299c    | 77.57 | - | 414  | 61  | 414  | Rsa1.0_03751.1 | 21025  | 19419  | 19794  | 81.2  | 85.3  | 106.2 |
| R5 | RGC9453c   | 77.74 | + | 433  | 0   | 433  | Rsa1.0_00470.1 | 81968  | 43387  | 43820  | 100.0 | 100.0 | 100.0 |
| R5 | RSS0810    | 77.98 |   |      |     |      |                |        |        |        |       |       |       |
| R5 | RGB12346c  | 78.96 | - | 494  | 0   | 494  | Rsa1.0_00627.1 | 71566  | 57620  | 58114  | 100.0 | 100.0 | 100.0 |
| R5 | CD32       | 79    |   |      |     |      |                |        |        |        |       |       |       |
| R5 | Rs2CL2329s | 79.26 | - | 906  | 1   | 906  | Rsa1.0_01539.1 | 43698  | 4189   | 5258   | 98.1  | 99.9  | 118.1 |
| R5 | RSS2090    | 79.62 | + | 740  | 3   | 740  | Rsa1.0_00863.1 | 254535 | 112235 | 113046 | 95.3  | 99.6  | 110.0 |
| R5 | RGA1887s   | 79.93 |   |      |     |      |                |        |        |        |       |       |       |
| R5 | RS2CL7437s | 80.03 | - | 719  | 569 | 718  | Rsa1.0_01230.1 | 50221  | 5850   | 5990   | 18.4  | 20.7  | 94.0  |
| R5 | CB25aN     | 80.23 |   |      |     |      |                |        |        |        |       |       |       |
| R5 | RS2CL3418s | 80.53 | + | 1010 | 0   | 1010 | Rsa1.0_00689.1 | 68305  | 41868  | 44067  | 99.4  | 100.0 | 217.7 |
| R5 | RS2CL6413s | 80.74 | - | 992  | 5   | 970  | Rsa1.0_00689.1 | 68305  | 12769  | 13825  | 57.9  | 97.3  | 109.4 |
| R5 | RS2CL4294s | 81.65 | + | 949  | 2   | 941  | Rsa1.0_03123.1 | 25207  | 21615  | 22836  | 45.5  | 99.0  | 130.0 |
| R5 | RSS0606    | 81.69 | + | 842  | 0   | 842  | Rsa1.0_03188.1 | 24722  | 9735   | 10947  | 99.9  | 100.0 | 143.9 |
| R5 | RGC5898c   | 81.86 | - | 538  | 0   | 368  | Rsa1.0_00165.1 | 116466 | 10610  | 10978  | 67.3  | 68.4  | 100.0 |
| R5 | RSS3723    | 81.9  | + | 818  | 0   | 818  |                | 101906 | 25269  | 26089  | 68.6  | 100.0 | 100.2 |
| R5 | N95848     | 82.6  |   |      |     |      |                |        |        |        |       |       |       |
| R5 | RGC6482c   | 82.83 | - | 426  | 0   | 426  | Rsa1.0_00946.1 | 58666  | 54057  | 54483  | 100.0 | 100.0 | 100.0 |
| R5 | RS2CL5033s | 82.88 |   |      |     |      |                |        |        |        |       |       |       |
| R5 | RGC8128c   | 83.47 | + | 412  | 0   | 412  | Rsa1.0_00653.1 | 70029  | 10577  | 10989  | 52.9  | 100.0 | 100.0 |



|    |            |        |   |      |    |      |                |        |        |        |       |       |       |
|----|------------|--------|---|------|----|------|----------------|--------|--------|--------|-------|-------|-------|
| R5 | RSS2992    | 83.74  | - | 859  | 4  | 859  | Rsa1.0_00798.1 | 63945  | 21398  | 22325  | 83.1  | 99.5  | 108.4 |
| R5 | RS2CL3856s | 83.87  | - | 1045 | 2  | 1044 | Rsa1.0_00653.1 | 70029  | 35915  | 36953  | 97.0  | 99.7  | 99.6  |
| R5 | RGC20400c  | 83.92  | - | 453  | 0  | 453  | Rsa1.0_00798.1 | 63945  | 40218  | 40671  | 90.5  | 100.0 | 100.0 |
| R5 | RS2CL3486s | 84.57  | - | 1186 | 0  | 1185 | Rsa1.0_00069.1 | 403561 | 102672 | 104056 | 99.2  | 99.9  | 116.8 |
| R5 | RGB2163c   | 85.28  | + | 404  | 0  | 265  | Rsa1.0_00069.1 | 403561 | 162865 | 163130 | 65.6  | 65.6  | 100.0 |
| R5 | RSS1973    | 86.18  | + | 776  | 0  | 776  | Rsa1.0_00069.1 | 403561 | 187771 | 188634 | 100.0 | 100.0 | 111.2 |
| R5 | RS2CL876s  | 86.59  | + | 809  | 2  | 808  | Rsa1.0_00069.1 | 403561 | 169706 | 171073 | 88.1  | 99.6  | 169.6 |
| R5 | RGC18337c  | 86.85  | - | 439  | 0  | 439  | Rsa1.0_01313.1 | 48387  | 13659  | 14098  | 100.0 | 100.0 | 100.0 |
| R5 | RS2CL3834s | 86.87  | - | 1013 | 5  | 1013 | Rsa1.0_00069.1 | 403561 | 206029 | 207119 | 97.3  | 99.5  | 108.1 |
| R5 | RS2CL1002s | 87.15  | + | 801  | 0  | 801  | Rsa1.0_01313.1 | 48387  | 12951  | 14262  | 96.6  | 100.0 | 163.7 |
| R5 | RGC13305c  | 87.84  | - | 504  | 0  | 504  | Rsa1.0_00232.1 | 104936 | 55033  | 55537  | 100.0 | 100.0 | 100.0 |
| R5 | RS2CL4231s | 88.98  | + | 1211 | 0  | 1207 | Rsa1.0_04911.1 | 15483  | 7753   | 9474   | 97.7  | 99.7  | 142.6 |
| R5 | RS2CL8487s | 89.15  | - | 1245 | 5  | 1238 | Rsa1.0_00960.1 | 58199  | 14657  | 16736  | 94.9  | 99.0  | 168.6 |
| R5 | RGC1982c   | 89.53  | - | 579  | 0  | 579  | Rsa1.0_01873.1 | 37903  | 14697  | 15276  | 49.9  | 100.0 | 100.0 |
| R5 | RGC6032c   | 89.53  | + | 466  | 0  | 466  | Rsa1.0_00960.1 | 58199  | 9376   | 9842   | 100.0 | 100.0 | 100.0 |
| R5 | RGC7124c   | 89.53  | + | 423  | 0  | 423  | Rsa1.0_00043.1 | 264937 | 236764 | 237187 | 100.0 | 100.0 | 100.0 |
| R5 | RS2CL6191s | 89.91  | + | 1232 | 0  | 1232 | Rsa1.0_01518.1 | 141402 | 131239 | 132545 | 99.9  | 100.0 | 106.0 |
| R5 | RGA1924s   | 90.52  |   |      |    |      |                |        |        |        |       |       |       |
| R5 | RSS1355    | 92.03  | + | 427  | 0  | 427  | Rsa1.0_13918.1 | 4094   | 423    | 1061   | 100.0 | 100.0 | 149.4 |
| R5 | RSS2290    | 93.13  | - | 560  | 0  | 560  | Rsa1.0_02028.1 | 35857  | 34549  | 35240  | 91.4  | 100.0 | 123.4 |
| R5 | RS2CL5313s | 93.45  | - | 1379 | 2  | 1376 | Rsa1.0_03524.1 | 22297  | 13551  | 15759  | 94.6  | 99.6  | 160.7 |
| R5 | Rs2CL1513s | 94.83  | - | 905  | 12 | 905  | Rsa1.0_14009.1 | 3924   | 2436   | 3850   | 96.4  | 98.7  | 158.3 |
| R5 | RGA2486s   | 95.37  |   |      |    |      |                |        |        |        |       |       |       |
| R5 | RSS3328    | 95.74  | + | 857  | 0  | 857  | Rsa1.0_00725.1 | 66757  | 25518  | 26874  | 98.3  | 100.0 | 158.2 |
| R5 | RGA2386s   | 95.75  |   |      |    |      |                |        |        |        |       |       |       |
| R5 | RS2CL3218s | 96.23  | + | 811  | 2  | 808  | Rsa1.0_03380.1 | 23320  | 4233   | 5277   | 97.2  | 99.4  | 129.5 |
| R5 | RS2CL3664s | 96.44  | + | 805  | 2  | 805  | Rsa1.0_00641.1 | 208241 | 145717 | 146749 | 97.1  | 99.8  | 128.5 |
| R5 | CC59       | 97.52  |   |      |    |      |                |        |        |        |       |       |       |
| R5 | RSS2770    | 98.32  |   |      |    |      |                |        |        |        |       |       |       |
| R5 | RGC1058c   | 98.62  | + | 424  | 0  | 424  | Rsa1.0_01965.1 | 36698  | 25119  | 25543  | 100.0 | 100.0 | 100.0 |
| R5 | RSS1146    | 99.14  | + | 863  | 0  | 863  | Rsa1.0_02435.1 | 31454  | 16180  | 17600  | 96.1  | 100.0 | 164.5 |
| R5 | RS2CL7110s | 99.54  | + | 815  | 1  | 815  | Rsa1.0_05569.1 | 13311  | 2709   | 3600   | 71.2  | 99.9  | 109.5 |
| R5 | RS2CL1096s | 99.98  |   |      |    |      |                |        |        |        |       |       |       |
| R5 | RGC2286c   | 100.36 | + | 419  | 0  | 419  | Rsa1.0_01428.1 | 46071  | 24303  | 24722  | 100.0 | 100.0 | 100.0 |
| R5 | RGC1397c   | 100.58 | - | 442  | 0  | 442  | Rsa1.0_00150.1 | 154416 | 20467  | 20909  | 100.0 | 100.0 | 100.0 |
| R5 | RGC6433c   | 101.17 | - | 439  | 0  | 439  |                | 21706  | 11046  | 11485  | 100.0 | 100.0 | 100.0 |

|    |            |        |   |      |     |      |                |        |        |        |       |       |       |
|----|------------|--------|---|------|-----|------|----------------|--------|--------|--------|-------|-------|-------|
| R5 | RSS2008    | 101.24 | + | 807  | 0   | 807  | Rsa1.0_00819.1 | 62918  | 20432  | 21752  | 98.8  | 100.0 | 163.6 |
| R5 | RSS1381    | 103.04 | - | 877  | 0   | 342  | Rsa1.0_00468.1 | 82095  | 18113  | 18455  | 18.4  | 39.0  | 100.0 |
| R5 | RGC7374c   | 104.07 | - | 482  | 0   | 482  | Rsa1.0_09919.1 | 6090   | 4523   | 5005   | 100.0 | 100.0 | 100.0 |
| R5 | RGC7955c   | 104.07 | - | 401  | 0   | 401  |                | 194198 | 130086 | 130487 | 100.0 | 100.0 | 100.0 |
| R5 | RSS3453    | 105.19 | - | 761  | 1   | 761  | Rsa1.0_00186.1 | 112669 | 111695 | 112549 | 96.9  | 99.9  | 112.4 |
| R5 | RS2CL1017s | 105.83 | - | 1129 | 1   | 1129 | Rsa1.0_02710.1 | 28492  | 20036  | 21555  | 92.8  | 99.9  | 134.7 |
| R5 | RS2CL2718s | 108.19 | + | 720  | 0   | 720  | Rsa1.0_02374.1 | 32043  | 25677  | 26901  | 99.3  | 100.0 | 170.0 |
| R5 | RSS2080    | 108.93 | - | 481  | 0   | 481  | Rsa1.0_01026.1 | 171624 | 140036 | 140518 | 87.1  | 100.0 | 100.2 |
| R5 | RS2CL6248s | 109.54 | + | 1197 | 3   | 1197 | Rsa1.0_00629.1 | 71381  | 44546  | 45859  | 96.4  | 99.8  | 110.0 |
| R5 | RGC9070c   | 109.89 | + | 421  | 0   | 421  | Rsa1.0_00506.1 | 79106  | 48473  | 48894  | 85.0  | 100.0 | 100.0 |
| R5 | RSS0835    | 110.06 | + | 795  | 0   | 795  | Rsa1.0_00186.1 | 112669 | 7686   | 9134   | 96.2  | 100.0 | 182.1 |
| R5 | RS2CL4474s | 110.66 | - | 1087 | 2   | 1087 | Rsa1.0_00685.1 | 68515  | 26875  | 28063  | 99.5  | 99.8  | 109.5 |
| R5 | RSS1657    | 111.19 | - | 840  | 0   | 722  | Rsa1.0_04317.1 | 17967  | 2169   | 2891   | 57.1  | 86.0  | 100.0 |
| R5 | RS2CL3771s | 111.23 | + | 1020 | 2   | 1020 | Rsa1.0_02508.1 | 30675  | 23820  | 25284  | 69.0  | 99.8  | 143.8 |
| R5 | RSS0799    | 111.5  | + | 593  | 6   | 593  | Rsa1.0_00767.1 | 64980  | 34719  | 35588  | 89.2  | 99.0  | 148.0 |
| R5 | RSS1437    | 112.1  | - | 811  | 0   | 806  | Rsa1.0_04542.1 | 16930  | 14605  | 16284  | 94.3  | 99.4  | 208.3 |
| R5 | RGC4231c   | 112.77 | - | 442  | 0   | 442  | Rsa1.0_01679.1 | 146876 | 139593 | 140035 | 100.0 | 100.0 | 100.0 |
| R5 | RGC3008c   | 113.12 | + | 542  | 0   | 542  | Rsa1.0_04491.1 | 17140  | 4485   | 5027   | 100.0 | 100.0 | 100.0 |
| R5 | RGC15844c  | 113.61 | - | 478  | 0   | 478  | Rsa1.0_03647.1 | 21597  | 10656  | 11134  | 100.0 | 100.0 | 100.0 |
| R5 | RS2CL7568s | 113.78 | - | 1336 | 0   | 1336 | Rsa1.0_00990.1 | 57445  | 15065  | 16652  | 95.1  | 100.0 | 118.8 |
| R5 | RSS2076    | 113.98 | - | 841  | 0   | 841  | Rsa1.0_00871.1 | 61539  | 48609  | 49450  | 100.0 | 100.0 | 100.0 |
| R5 | RGC793c    | 114.27 | + | 487  | 107 | 437  | Rsa1.0_00514.1 | 78421  | 57413  | 57743  | 67.8  | 67.8  | 100.0 |
| R5 | RGC4102c   | 114.8  | + | 402  | 0   | 402  | Rsa1.0_02315.1 | 32618  | 10836  | 11238  | 100.0 | 100.0 | 100.0 |
| R5 | RGB28864c  | 115.22 | + | 508  | 0   | 508  | Rsa1.0_00217.1 | 107079 | 6955   | 7463   | 100.0 | 100.0 | 100.0 |
| R5 | CA04a      | 115.62 |   |      |     |      |                |        |        |        |       |       |       |
| R5 | RGC24023c  | 115.72 | - | 477  | 0   | 477  | Rsa1.0_02599.1 | 29660  | 9078   | 9555   | 100.0 | 100.0 | 100.0 |
| R5 | RGC25363c  | 115.72 | + | 415  | 0   | 415  | Rsa1.0_00186.1 | 112669 | 46437  | 46852  | 100.0 | 100.0 | 100.0 |
| R5 | RGC7157c   | 115.72 | + | 462  | 0   | 462  | Rsa1.0_00685.1 | 68515  | 7836   | 8298   | 100.0 | 100.0 | 100.0 |
| R5 | RSS1610    | 116.43 | - | 606  | 1   | 606  |                | 194198 | 185130 | 185738 | 91.6  | 99.8  | 100.5 |
| R5 | RS2CL4228s | 116.53 | - | 810  | 0   | 797  | Rsa1.0_08412.1 | 7404   | 4360   | 5456   | 95.6  | 98.4  | 137.5 |
| R5 | RSS2461    | 117.75 | - | 869  | 1   | 869  | Rsa1.0_00279.1 | 100039 | 83466  | 85220  | 95.2  | 99.9  | 202.1 |
| R5 | RSS3878    | 117.75 | + | 791  | 0   | 791  | Rsa1.0_00546.1 | 76523  | 45699  | 46491  | 100.0 | 100.0 | 100.1 |
| R5 | RS2CL3657s | 117.86 | - | 803  | 34  | 799  | Rsa1.0_00279.1 | 100039 | 5703   | 7209   | 90.9  | 95.3  | 196.9 |
| R5 | RSS3562    | 117.95 | - | 466  | 0   | 466  | Rsa1.0_00279.1 | 100039 | 43989  | 44525  | 88.2  | 100.0 | 115.0 |
| R5 | RGC1797c   | 118.51 | + | 402  | 0   | 402  | Rsa1.0_00377.1 | 90038  | 82355  | 82757  | 100.0 | 100.0 | 100.0 |
| R5 | RSS0491    | 118.75 | - | 699  | 0   | 699  | Rsa1.0_05293.1 | 14237  | 7455   | 8771   | 99.9  | 100.0 | 188.3 |

|    |            |        |   |      |     |      |                |        |        |        |       |       |       |
|----|------------|--------|---|------|-----|------|----------------|--------|--------|--------|-------|-------|-------|
| R5 | RSS0607    | 118.85 | - | 815  | 0   | 815  | Rsa1.0_00484.1 | 203294 | 136731 | 137836 | 98.9  | 100.0 | 135.6 |
| R5 | RGC5241c   | 119.04 | - | 416  | 0   | 416  | Rsa1.0_00151.1 | 119541 | 37377  | 37793  | 100.0 | 100.0 | 100.0 |
| R5 | RGC9697c   | 119.69 | - | 456  | 135 | 284  | Rsa1.0_00618.1 | 72195  | 36815  | 36964  | 32.7  | 32.7  | 100.0 |
| R5 | RSS0794    | 120.35 | + | 691  | 0   | 691  | Rsa1.0_07440.1 | 9389   | 4109   | 4800   | 100.0 | 100.0 | 100.0 |
| R5 | RS2CL2631s | 120.38 | - | 1034 | 1   | 1034 | Rsa1.0_10201.1 | 5946   | 417    | 1448   | 97.3  | 99.9  | 99.8  |
| R5 | RGC27939c  | 120.85 | + | 453  | 0   | 453  | Rsa1.0_06002.1 | 11976  | 7094   | 7547   | 100.0 | 100.0 | 100.0 |
| R5 | RGC2709c   | 120.96 | - | 425  | 0   | 425  | Rsa1.0_00484.1 | 203294 | 161141 | 161566 | 100.0 | 100.0 | 100.0 |
| R5 | RGC1165c   | 120.98 | - | 458  | 0   | 458  | Rsa1.0_00978.1 | 57739  | 21904  | 22362  | 100.0 | 100.0 | 100.0 |
| R5 | RGC15300c  | 120.98 |   |      |     |      |                |        |        |        |       |       |       |
| R5 | RGB17888c  | 120.98 | - | 477  | 0   | 477  | Rsa1.0_00978.1 | 57739  | 13357  | 13834  | 100.0 | 100.0 | 100.0 |
| R5 | RGC25318c  | 120.98 | - | 537  | 0   | 537  | Rsa1.0_01386.1 | 46765  | 20563  | 21100  | 100.0 | 100.0 | 100.0 |
| R5 | RGC15052c  | 121.1  | + | 575  | 0   | 575  | Rsa1.0_00151.1 | 119541 | 108743 | 109318 | 100.0 | 100.0 | 100.0 |
| R5 | RS2CL3363s | 121.34 | - | 1415 | 0   | 1415 | Rsa1.0_03834.1 | 20572  | 11806  | 13211  | 96.5  | 100.0 | 99.3  |
| R5 | RSS0599    | 121.85 | - | 796  | 0   | 796  | Rsa1.0_01234.1 | 50183  | 31582  | 33075  | 97.4  | 100.0 | 187.6 |
| R5 | RGC7029c   | 122.02 | - | 456  | 0   | 456  | Rsa1.0_01234.1 | 50183  | 35720  | 36176  | 100.0 | 100.0 | 100.0 |
| R5 | Rs2CL1713s | 122.09 | - | 1209 | 0   | 1207 | Rsa1.0_00628.1 | 214360 | 182830 | 184389 | 97.4  | 99.8  | 129.2 |
| R5 | RS2CL2036s | 122.64 | + | 1482 | 1   | 1482 | Rsa1.0_00628.1 | 214360 | 201779 | 203526 | 76.8  | 99.9  | 118.0 |
| R5 | RGC20412c  | 123.21 | + | 414  | 0   | 414  | Rsa1.0_00032.1 | 306326 | 261698 | 262112 | 100.0 | 100.0 | 100.0 |
| R5 | RGC3985c   | 123.21 | - | 589  | 0   | 589  | Rsa1.0_00032.1 | 306326 | 295635 | 296224 | 99.8  | 100.0 | 100.0 |
| R5 | CB14       | 123.25 |   |      |     |      |                |        |        |        |       |       |       |
| R5 | Rs2CL1337s | 123.75 | - | 757  | 1   | 757  | Rsa1.0_00151.1 | 119541 | 109865 | 111654 | 98.3  | 99.9  | 236.6 |
| R5 | RSS2087    | 124.05 | - | 870  | 0   | 870  | Rsa1.0_00978.1 | 57739  | 24459  | 25330  | 96.7  | 100.0 | 100.1 |
| R5 | RSS2733    | 124.15 | + | 460  | 0   | 460  | Rsa1.0_00978.1 | 57739  | 25289  | 25980  | 100.0 | 100.0 | 150.2 |
| R5 | RS2CL3095s | 125.44 | + | 784  | 2   | 783  | Rsa1.0_01965.1 | 36698  | 22561  | 24540  | 96.1  | 99.6  | 253.4 |
| R5 | RGC7851c   | 125.81 | - | 464  | 0   | 464  | Rsa1.0_00817.1 | 62961  | 43133  | 43597  | 100.0 | 100.0 | 100.0 |
| R5 | Rs2CL1671s | 126.08 | - | 1115 | 1   | 1115 | Rsa1.0_01712.1 | 154210 | 1953   | 3293   | 99.2  | 99.9  | 120.3 |
| R5 | RSS3895    | 126.45 | + | 897  | 4   | 813  | Rsa1.0_02411.1 | 31655  | 27331  | 28233  | 87.7  | 90.2  | 111.5 |
| R5 | RS2CL1405s | 126.99 | - | 734  | 0   | 634  | Rsa1.0_02411.1 | 31655  | 17404  | 18255  | 86.0  | 86.4  | 134.2 |
| R5 | RSS1697    | 127.25 | - | 766  | 1   | 766  | Rsa1.0_00725.1 | 66757  | 26327  | 27163  | 96.1  | 99.9  | 109.3 |
| R5 | RGC1110c   | 128.21 | - | 511  | 0   | 511  | Rsa1.0_01440.1 | 45807  | 10572  | 11083  | 81.6  | 100.0 | 100.0 |
| R5 | RGC5424c   | 128.21 | + | 537  | 0   | 537  | Rsa1.0_00080.1 | 190437 | 13918  | 14455  | 100.0 | 100.0 | 100.0 |
| R5 | CA74       | 128.25 |   |      |     |      |                |        |        |        |       |       |       |
| R5 | RS2CL4817s | 128.42 | + | 786  | 2   | 776  | Rsa1.0_00602.1 | 73302  | 35792  | 36565  | 97.1  | 98.5  | 99.9  |
| R5 | RSS0139    | 129.25 | - | 656  | 441 | 656  | Rsa1.0_00032.1 | 306326 | 192394 | 192609 | 32.8  | 32.8  | 100.0 |
| R5 | RS2CL3543s | 129.83 | - | 1023 | 0   | 958  | Rsa1.0_00789.1 | 64233  | 33702  | 34945  | 68.8  | 93.7  | 129.8 |
| R5 | RS2CL6094s | 130.35 | - | 953  | 1   | 953  | Rsa1.0_00789.1 | 64233  | 49233  | 50813  | 88.0  | 99.9  | 166.0 |

|    |            |        |   |      |     |      |                |        |        |        |       |       |       |
|----|------------|--------|---|------|-----|------|----------------|--------|--------|--------|-------|-------|-------|
| R5 | RGB90c     | 130.75 | - | 403  | 0   | 403  | Rsa1.0_00602.1 | 73302  | 43958  | 44361  | 100.0 | 100.0 | 100.0 |
| R5 | RSS0258    | 131.05 | - | 863  | 0   | 863  | Rsa1.0_00602.1 | 73302  | 1678   | 2643   | 99.2  | 100.0 | 111.8 |
| R5 | RS2CL2801s | 131.77 | - | 649  | 0   | 649  | Rsa1.0_04486.1 | 17161  | 8412   | 9061   | 99.5  | 100.0 | 100.0 |
| R5 | ACGM13     | 132.35 |   |      |     |      |                |        |        |        |       |       |       |
| R5 | RS2CL2046s | 132.49 | - | 825  | 2   | 825  | Rsa1.0_01440.1 | 45807  | 13754  | 14806  | 91.5  | 99.8  | 127.8 |
| R5 | RS2CL6493s | 132.63 | + | 1096 | 1   | 1096 | Rsa1.0_04486.1 | 17161  | 12613  | 14123  | 96.4  | 99.9  | 137.9 |
| R5 | RSS1153    | 132.95 | + | 818  | 0   | 818  | Rsa1.0_03990.1 | 19676  | 3566   | 4888   | 98.4  | 100.0 | 161.6 |
| R5 | RSS3828    | 133.15 | + | 736  | 0   | 736  | Rsa1.0_00817.1 | 62961  | 26769  | 27504  | 99.6  | 100.0 | 99.9  |
| R5 | RS2CL5254s | 133.67 | + | 822  | 107 | 822  | Rsa1.0_01308.1 | 48596  | 17349  | 18138  | 64.5  | 87.0  | 110.4 |
| R5 | CA04b      | 133.85 |   |      |     |      |                |        |        |        |       |       |       |
| R5 | RS2CL5065s | 133.9  | + | 1125 | 3   | 1124 | Rsa1.0_00784.1 | 64359  | 26029  | 28124  | 94.7  | 99.6  | 186.9 |
| R5 | RS2CL4091s | 134.28 | - | 834  | 3   | 832  | Rsa1.0_05595.1 | 13228  | 4395   | 5624   | 90.2  | 99.4  | 148.3 |
| R5 | RS2CL4365s | 134.82 | - | 1297 | 2   | 1297 | Rsa1.0_01591.1 | 42718  | 22514  | 24555  | 99.2  | 99.9  | 157.6 |
| R5 | CD63       | 135.05 |   |      |     |      |                |        |        |        |       |       |       |
| R5 | Rs2CL2530s | 135.15 | + | 661  | 0   | 661  | Rsa1.0_05595.1 | 13228  | 3233   | 4172   | 94.9  | 100.0 | 142.1 |
| R5 | OPE03b     | 135.25 |   |      |     |      |                |        |        |        |       |       |       |
| R5 | RGC15061c  | 136.17 | - | 593  | 0   | 593  | Rsa1.0_00339.1 | 222974 | 20595  | 21188  | 100.0 | 100.0 | 100.0 |
| R5 | RGB2029c   | 136.17 | - | 534  | 189 | 534  | Rsa1.0_00339.1 | 222974 | 75448  | 75746  | 55.8  | 64.6  | 86.4  |
| R5 | RGB5705c   | 136.17 | + | 467  | 0   | 467  | Rsa1.0_00339.1 | 222974 | 175734 | 176201 | 100.0 | 100.0 | 100.0 |
| R5 | RSS2040    | 136.35 | - | 822  | 0   | 822  | Rsa1.0_00784.1 | 64359  | 2795   | 3712   | 94.7  | 100.0 | 111.6 |
| R5 | RS2CL7735s | 136.88 | + | 1318 | 2   | 1318 | Rsa1.0_00409.1 | 146788 | 123783 | 125151 | 95.8  | 99.9  | 104.0 |
| R5 | RS2CL6813s | 137.44 | - | 880  | 0   | 879  | Rsa1.0_00339.1 | 222974 | 180013 | 181129 | 96.3  | 99.9  | 127.0 |
| R5 | RGC4124c   | 137.99 | + | 444  | 0   | 444  | Rsa1.0_00032.1 | 306326 | 185276 | 185720 | 100.0 | 100.0 | 100.0 |
| R5 | CC45a      | 138.45 |   |      |     |      |                |        |        |        |       |       |       |
| R5 | RSS0084    | 139.15 | + | 521  | 1   | 521  | Rsa1.0_14855.1 | 3011   | 636    | 1588   | 95.4  | 99.8  | 183.1 |
| R5 | RS2CL5459s | 139.19 | - | 1180 | 3   | 1180 | Rsa1.0_00213.1 | 108167 | 36367  | 38863  | 96.7  | 99.8  | 212.1 |
| R5 | RS2CL5893s | 139.4  | + | 554  | 9   | 554  | Rsa1.0_00105.1 | 134138 | 81169  | 81720  | 93.5  | 98.4  | 101.1 |
| R5 | RS2CL1331s | 139.71 | + | 1038 | 17  | 1037 | Rsa1.0_00105.1 | 134138 | 71490  | 73331  | 95.0  | 98.3  | 180.5 |
| R5 | RSS1903    | 140.05 | + | 407  | 0   | 336  | Rsa1.0_00363.1 | 90968  | 53657  | 54108  | 82.6  | 82.6  | 134.2 |
| R5 | RGA1658s   | 140.08 |   |      |     |      |                |        |        |        |       |       |       |
| R5 | RS2CL1047s | 140.55 | + | 799  | 0   | 798  | Rsa1.0_00105.1 | 134138 | 90483  | 92188  | 92.0  | 99.9  | 213.7 |
| R5 | RSS1242    | 140.85 | - | 862  | 2   | 862  | Rsa1.0_00213.1 | 108167 | 35048  | 35921  | 97.3  | 99.8  | 101.5 |
| R5 | RSS1489    | 140.85 | + | 652  | 0   | 652  | Rsa1.0_01168.1 | 153765 | 40994  | 42117  | 59.1  | 100.0 | 172.2 |
| R5 | RS2CL5612s | 141.78 | - | 1148 | 0   | 1148 | Rsa1.0_00793.1 | 64103  | 38944  | 40562  | 94.9  | 100.0 | 140.9 |
| R5 | CF19       | 142.05 |   |      |     |      |                |        |        |        |       |       |       |
| R5 | RS2CL4128s | 142.13 | + | 744  | 2   | 744  | Rsa1.0_02392.1 | 152517 | 29661  | 30400  | 98.1  | 99.7  | 99.6  |

|    |            |        |   |      |    |      |                |        |        |        |       |       |       |
|----|------------|--------|---|------|----|------|----------------|--------|--------|--------|-------|-------|-------|
| R5 | RS2CL1648s | 143.3  | - | 1158 | 0  | 1158 | Rsa1.0_00420.1 | 86496  | 40528  | 42407  | 91.2  | 100.0 | 162.3 |
| R5 | RGC16329c  | 143.35 | - | 410  | 0  | 410  | Rsa1.0_00087.1 | 761073 | 56207  | 56617  | 100.0 | 100.0 | 100.0 |
| R5 | RGC2498c   | 143.35 | + | 463  | 0  | 463  | Rsa1.0_00087.1 | 761073 | 200708 | 201171 | 100.0 | 100.0 | 100.0 |
| R5 | RGC4098c   | 143.35 | + | 402  | 0  | 402  | Rsa1.0_01737.1 | 40101  | 6243   | 6645   | 100.0 | 100.0 | 100.0 |
| R5 | RGC4195c   | 143.35 | - | 519  | 0  | 519  | Rsa1.0_01811.1 | 38977  | 31311  | 31830  | 100.0 | 100.0 | 100.0 |
| R5 | RGA2325s   | 144.54 |   |      |    |      |                |        |        |        |       |       |       |
| R5 | RSS3694    | 144.65 | + | 872  | 0  | 872  | Rsa1.0_02180.1 | 34176  | 26552  | 27617  | 97.1  | 100.0 | 122.1 |
| R5 | RSS1361    | 145.65 | - | 880  | 45 | 880  | Rsa1.0_02392.1 | 152517 | 25981  | 27504  | 94.9  | 94.9  | 182.4 |
| R5 | RS2CL5529s | 145.69 |   |      |    |      |                |        |        |        |       |       |       |
| R5 | RS2CL5178s | 146.41 | - | 887  | 2  | 887  | Rsa1.0_00087.1 | 761073 | 312460 | 313447 | 94.4  | 99.8  | 111.5 |
| R5 | RS2CL6670s | 146.79 | + | 944  | 1  | 939  | Rsa1.0_00087.1 | 761073 | 621070 | 622821 | 96.4  | 99.4  | 186.7 |
| R5 | RGB1089c   | 147.24 | + | 503  | 29 | 503  | Rsa1.0_00087.1 | 761073 | 585789 | 586263 | 58.1  | 94.2  | 100.0 |
| R5 | RS2CL5532s | 147.65 | - | 1079 | 5  | 1079 | Rsa1.0_00087.1 | 761073 | 730623 | 732298 | 92.8  | 99.5  | 156.0 |
| R5 | RS2CL6564s | 148.26 | + | 900  | 2  | 900  | Rsa1.0_00078.1 | 175053 | 136069 | 137566 | 83.6  | 99.8  | 166.7 |
| R5 | RS2CL4868s | 148.73 | - | 1140 | 0  | 1140 | Rsa1.0_00078.1 | 175053 | 37459  | 38791  | 98.8  | 100.0 | 116.8 |
| R5 | Rs2CL2284s | 149.12 | - | 956  | 2  | 955  | Rsa1.0_01068.1 | 55208  | 45677  | 46845  | 95.7  | 99.7  | 122.6 |
| R5 | RGC908c    | 149.41 | + | 529  | 0  | 529  | Rsa1.0_04405.1 | 17508  | 7344   | 7873   | 100.0 | 100.0 | 100.0 |
| R5 | RSS2296    | 149.85 | + | 842  | 0  | 842  | Rsa1.0_00087.1 | 761073 | 295735 | 296583 | 95.0  | 100.0 | 100.7 |
| R5 | RSS3026    | 149.95 | - | 846  | 66 | 787  | Rsa1.0_00087.1 | 761073 | 184673 | 185388 | 52.8  | 85.2  | 99.2  |
| R5 | RSS0361    | 150.15 | + | 654  | 0  | 654  | Rsa1.0_00087.1 | 761073 | 186488 | 187738 | 95.6  | 100.0 | 191.1 |
| R5 | Rs2CL1785s | 150.52 |   |      |    |      |                |        |        |        |       |       |       |
| R5 | RSS0292_a  | 154.15 |   |      |    |      |                |        |        |        |       |       |       |
| R5 | RGB1952c   | 154.21 | - | 468  | 0  | 468  | Rsa1.0_01285.1 | 172709 | 31880  | 32348  | 100.0 | 100.0 | 100.0 |
| R6 | Rs2CL1800s | 0      | + | 658  | 0  | 658  | Rsa1.0_00951.1 | 164588 | 113344 | 114787 | 99.5  | 100.0 | 219.3 |
| R6 | RGA2109s   | 1.63   |   |      |    |      |                |        |        |        |       |       |       |
| R6 | RSS0284    | 3.02   |   |      |    |      |                |        |        |        |       |       |       |
| R6 | RGC7282c   | 3.44   | - | 420  | 0  | 420  | Rsa1.0_00609.1 | 72785  | 57279  | 57698  | 99.8  | 100.0 | 99.8  |
| R6 | RGC13867c  | 4.8    | + | 560  | 0  | 560  | Rsa1.0_01233.1 | 50184  | 30754  | 31314  | 100.0 | 100.0 | 100.0 |
| R6 | CA22       | 5.12   |   |      |    |      |                |        |        |        |       |       |       |
| R6 | RGC5600c   | 5.27   | + | 448  | 0  | 448  | Rsa1.0_01806.1 | 39021  | 13688  | 14136  | 90.2  | 100.0 | 100.0 |
| R6 | RSS0750    | 6.52   | + | 214  | 0  | 214  |                | 358124 | 29394  | 29611  | 99.5  | 100.0 | 101.4 |
| R6 | RSS1106    | 6.52   | - | 533  | 3  | 513  | Rsa1.0_01806.1 | 39021  | 24550  | 25044  | 90.6  | 95.7  | 96.9  |
| R6 | RS2CL1259s | 7.06   | + | 736  | 0  | 736  | Rsa1.0_01117.1 | 53465  | 38990  | 39893  | 99.9  | 100.0 | 122.7 |
| R6 | RS2CL2749s | 7.84   | - | 1488 | 0  | 1487 |                | 358124 | 86342  | 89007  | 79.7  | 99.9  | 179.2 |
| R6 | RSS0881    | 8.02   | - | 509  | 0  | 509  | Rsa1.0_01806.1 | 39021  | 12196  | 12993  | 89.8  | 100.0 | 156.6 |

|    |            |       |   |      |    |      |                |        |        |        |       |       |       |
|----|------------|-------|---|------|----|------|----------------|--------|--------|--------|-------|-------|-------|
| R6 | RSS1501    | 8.02  | + | 330  | 0  | 330  |                | 358124 | 66030  | 66362  | 100.0 | 100.0 | 100.6 |
| R6 | RGC13819c  | 8.2   | - | 404  | 0  | 404  | Rsa1.0_00030.1 | 250988 | 50016  | 50420  | 100.0 | 100.0 | 100.0 |
| R6 | RSS3965_a  | 8.82  | + | 544  | 0  | 544  | Rsa1.0_01602.1 | 42503  | 35794  | 36336  | 99.3  | 100.0 | 99.6  |
| R6 | Rs2CL1793s | 9     | - | 775  | 0  | 774  |                | 358124 | 201197 | 203343 | 98.7  | 99.9  | 277.3 |
| R6 | RSS0818    | 9.12  | - | 839  | 0  | 839  | Rsa1.0_00030.1 | 250988 | 184441 | 185348 | 99.6  | 100.0 | 108.1 |
| R6 | RGB6680c   | 9.17  |   |      |    |      |                |        |        |        |       |       |       |
| R6 | RS2CL6567s | 9.92  | + | 1331 | 2  | 1331 | Rsa1.0_01553.1 | 43379  | 33373  | 35255  | 96.7  | 99.9  | 141.6 |
| R6 | RSS0864    | 10.32 | + | 740  | 0  | 740  | Rsa1.0_00131.1 | 432233 | 33938  | 34927  | 100.0 | 100.0 | 133.7 |
| R6 | RSS2760    | 10.32 | + | 870  | 0  | 839  | Rsa1.0_00131.1 | 432233 | 267849 | 269037 | 92.9  | 96.4  | 141.6 |
| R6 | RSS2859    | 10.32 | - | 858  | 0  | 735  | Rsa1.0_01097.1 | 173349 | 33474  | 34744  | 75.3  | 85.7  | 172.8 |
| R6 | RGC6359c   | 10.59 | + | 465  | 0  | 465  | Rsa1.0_00030.1 | 250988 | 188044 | 188509 | 100.0 | 100.0 | 100.0 |
| R6 | RS2CL4163s | 10.95 | + | 777  | 0  | 777  | Rsa1.0_00030.1 | 250988 | 141373 | 142152 | 99.2  | 100.0 | 100.3 |
| R6 | RS2CL3329s | 11.58 | - | 869  | 3  | 867  | Rsa1.0_00196.1 | 109960 | 18592  | 19738  | 60.3  | 99.4  | 132.6 |
| R6 | RS2CL5007s | 12.62 | - | 725  | 0  | 725  | Rsa1.0_00196.1 | 109960 | 51496  | 52397  | 71.0  | 100.0 | 124.3 |
| R6 | RGC10902c  | 12.91 | - | 472  | 0  | 472  | Rsa1.0_00131.1 | 432233 | 164405 | 164877 | 100.0 | 100.0 | 100.0 |
| R6 | RS2CL5739s | 13.18 | - | 776  | 0  | 773  | Rsa1.0_00937.1 | 59061  | 22551  | 23330  | 98.7  | 99.6  | 100.8 |
| R6 | RGC12804c  | 13.49 | - | 441  | 0  | 441  | Rsa1.0_00131.1 | 432233 | 91877  | 92318  | 100.0 | 100.0 | 100.0 |
| R6 | RSS2138    | 13.72 | + | 856  | 0  | 856  | Rsa1.0_01126.1 | 53127  | 12828  | 14670  | 96.9  | 100.0 | 215.2 |
| R6 | RGB4153c   | 13.85 | - | 530  | 0  | 530  | Rsa1.0_00131.1 | 432233 | 275922 | 276452 | 76.6  | 100.0 | 100.0 |
| R6 | RSS0662    | 13.92 | - | 838  | 0  | 838  |                | 59481  | 8137   | 9280   | 99.4  | 100.0 | 136.4 |
| R6 | RSS2505    | 14.32 | + | 862  | 0  | 862  |                | 59481  | 56093  | 57283  | 96.5  | 100.0 | 138.1 |
| R6 | RS2CL5533s | 14.67 | - | 1035 | 85 | 1030 | Rsa1.0_00025.1 | 277312 | 240456 | 241286 | 51.6  | 91.3  | 87.8  |
| R6 | RS2CL4358s | 14.98 | + | 1086 | 9  | 1086 | Rsa1.0_00110.1 | 132719 | 93130  | 95045  | 90.5  | 99.2  | 177.8 |
| R6 | RGC2728c   | 15.34 | + | 402  | 0  | 402  | Rsa1.0_03502.1 | 22446  | 14050  | 14452  | 100.0 | 100.0 | 100.0 |
| R6 | RS2CL4648s | 16.17 | + | 1106 | 2  | 1104 | Rsa1.0_02706.1 | 28522  | 11821  | 14483  | 98.3  | 99.6  | 241.6 |
| R6 | RGC5774c   | 16.49 | + | 553  | 0  | 553  | Rsa1.0_00110.1 | 132719 | 65184  | 65737  | 100.0 | 100.0 | 100.0 |
| R6 | RGC12486c  | 16.98 | - | 511  | 0  | 511  |                | 174827 | 163535 | 164046 | 100.0 | 100.0 | 100.0 |
| R6 | CC68       | 17.43 |   |      |    |      |                |        |        |        |       |       |       |
| R6 | RGC6279c   | 17.74 | + | 428  | 0  | 428  | Rsa1.0_00951.1 | 164588 | 37254  | 37682  | 100.0 | 100.0 | 100.0 |
| R6 | RS2CL3679s | 17.81 | + | 794  | 2  | 793  | Rsa1.0_02584.1 | 29877  | 247    | 1201   | 97.7  | 99.6  | 120.6 |
| R6 | RGC395c    | 18.06 | + | 478  | 0  | 478  | Rsa1.0_04626.1 | 16611  | 9407   | 9885   | 100.0 | 100.0 | 100.0 |
| R6 | RS2CL1088s | 18.31 | - | 999  | 2  | 999  | Rsa1.0_00749.1 | 65933  | 20460  | 21782  | 96.6  | 99.8  | 132.6 |
| R6 | RS2CL1149s | 18.56 | - | 824  | 2  | 824  | Rsa1.0_00203.1 | 109129 | 2797   | 4234   | 99.4  | 99.8  | 174.8 |
| R6 | RGC10056c  | 18.77 | + | 476  | 0  | 476  | Rsa1.0_01126.1 | 53127  | 13404  | 13880  | 100.0 | 100.0 | 100.0 |
| R6 | RGC6186c   | 19.41 | - | 444  | 0  | 444  | Rsa1.0_00203.1 | 109129 | 80012  | 80456  | 100.0 | 100.0 | 100.0 |
| R6 | RGC12389c  | 20.04 | + | 529  | 0  | 529  | Rsa1.0_00239.1 | 104332 | 23516  | 24045  | 94.7  | 100.0 | 100.0 |

|    |            |       |   |      |    |      |                |        |        |        |       |       |       |
|----|------------|-------|---|------|----|------|----------------|--------|--------|--------|-------|-------|-------|
| R6 | RGC16041c  | 20.04 | - | 492  | 0  | 492  | Rsa1.0_00604.1 | 146282 | 11378  | 11870  | 100.0 | 100.0 | 100.0 |
| R6 | RGC4166c   | 20.04 | + | 404  | 0  | 404  | Rsa1.0_00239.1 | 104332 | 46210  | 46614  | 100.0 | 100.0 | 100.0 |
| R6 | RGC9621c   | 20.04 | + | 522  | 0  | 522  | Rsa1.0_00604.1 | 146282 | 124978 | 125500 | 100.0 | 100.0 | 100.0 |
| R6 | RS2CL3998s | 20.73 | - | 861  | 2  | 860  |                | 88189  | 7406   | 8747   | 96.8  | 99.7  | 156.3 |
| R6 | RSS2497    | 21.32 | - | 774  | 53 | 774  | Rsa1.0_00195.1 | 251884 | 215691 | 216379 | 83.0  | 93.2  | 95.4  |
| R6 | RSS0895    | 21.82 |   |      |    |      |                |        |        |        |       |       |       |
| R6 | RGA107s    | 22.47 |   |      |    |      |                |        |        |        |       |       |       |
| R6 | RSS2680    | 22.71 | - | 854  | 0  | 854  | Rsa1.0_00005.1 | 353093 | 144539 | 146349 | 100.0 | 100.0 | 211.9 |
| R6 | RSS1367    | 22.81 | + | 821  | 26 | 821  | Rsa1.0_00181.1 | 114269 | 77841  | 78636  | 96.8  | 96.8  | 100.0 |
| R6 | RSS3306    | 22.81 | - | 879  | 0  | 878  | Rsa1.0_00005.1 | 353093 | 122794 | 124442 | 87.5  | 99.9  | 187.7 |
| R6 | RSS3125    | 23.01 | - | 882  | 0  | 882  | Rsa1.0_00005.1 | 353093 | 144540 | 146379 | 100.0 | 100.0 | 208.5 |
| R6 | RS2CL8378s | 23.28 | + | 1186 | 0  | 1186 | Rsa1.0_01740.1 | 39986  | 12689  | 14758  | 99.7  | 100.0 | 174.5 |
| R6 | RSS3489    | 23.61 | + | 749  | 0  | 749  | Rsa1.0_00181.1 | 114269 | 42149  | 42898  | 92.5  | 100.0 | 100.0 |
| R6 | RS2CL5725s | 24.27 | + | 1048 | 12 | 1046 | Rsa1.0_06819.1 | 10302  | 1253   | 2284   | 95.3  | 98.7  | 99.7  |
| R6 | RSS0768    | 24.6  | + | 754  | 0  | 754  | Rsa1.0_00812.1 | 63233  | 34146  | 34902  | 89.1  | 100.0 | 100.3 |
| R6 | RS2CL1483s | 25.01 | - | 1042 | 2  | 1042 | Rsa1.0_00701.1 | 67691  | 5310   | 6453   | 67.4  | 99.8  | 109.9 |
| R6 | RS2CL6241s | 26.23 | - | 1161 | 2  | 1148 | Rsa1.0_00701.1 | 67691  | 40933  | 42842  | 96.3  | 98.7  | 166.6 |
| R6 | RS2CL7817s | 26.73 | - | 546  | 2  | 530  | Rsa1.0_00701.1 | 67691  | 5923   | 6451   | 70.3  | 96.7  | 100.0 |
| R6 | RGA1973s   | 26.81 |   |      |    |      |                |        |        |        |       |       |       |
| R6 | RGC1312c   | 27    | - | 470  | 0  | 470  | Rsa1.0_01740.1 | 39986  | 16935  | 17405  | 100.0 | 100.0 | 100.0 |
| R6 | RGC2219c   | 27    | - | 405  | 0  | 405  | Rsa1.0_00005.1 | 353093 | 333479 | 333884 | 93.6  | 100.0 | 100.0 |
| R6 | RGC4977c   | 27.32 | + | 545  | 0  | 545  | Rsa1.0_00888.1 | 60978  | 5678   | 6223   | 76.9  | 100.0 | 100.0 |
| R6 | RS2CL6432s | 27.84 | + | 777  | 9  | 777  | Rsa1.0_00181.1 | 114269 | 65747  | 66676  | 96.1  | 98.8  | 121.0 |
| R6 | CA09a      | 27.86 |   |      |    |      |                |        |        |        |       |       |       |
| R6 | Rs2CL2337s | 28.18 | - | 778  | 0  | 778  | Rsa1.0_03726.1 | 21160  | 14301  | 15470  | 92.4  | 100.0 | 150.3 |
| R6 | RSS3301    | 28.35 | + | 798  | 0  | 798  | Rsa1.0_00812.1 | 63233  | 34616  | 35406  | 94.7  | 100.0 | 99.0  |
| R6 | RS2CL7813s | 28.43 | - | 687  | 1  | 687  | Rsa1.0_00169.1 | 274298 | 270923 | 272129 | 96.7  | 99.9  | 175.8 |
| R6 | RGB5240c   | 28.79 | - | 535  | 0  | 535  | Rsa1.0_02851.1 | 27295  | 5690   | 6225   | 100.0 | 100.0 | 100.0 |
| R6 | RGA1878s   | 29.4  |   |      |    |      |                |        |        |        |       |       |       |
| R6 | RS2CL8063s | 29.63 | - | 1044 | 2  | 1044 | Rsa1.0_00035.1 | 176449 | 167699 | 168766 | 96.3  | 99.8  | 102.4 |
| R6 | RS2CL4703s | 30.21 | + | 864  | 2  | 860  | Rsa1.0_08909.1 | 6799   | 4802   | 5646   | 92.7  | 99.3  | 98.4  |
| R6 | RSS0518    | 30.33 | - | 601  | 0  | 601  | Rsa1.0_02536.1 | 30368  | 28715  | 29317  | 100.0 | 100.0 | 100.2 |
| R6 | Rs2CL1678s | 30.94 | - | 1259 | 1  | 1259 | Rsa1.0_02393.1 | 31795  | 14420  | 15689  | 99.5  | 99.9  | 100.9 |
| R6 | RS2CL4308s | 31.06 | - | 1290 | 0  | 1283 | Rsa1.0_01217.1 | 50554  | 46718  | 48000  | 64.9  | 99.5  | 99.9  |
| R6 | RGC10301c  | 31.56 | + | 505  | 0  | 505  | Rsa1.0_00181.1 | 114269 | 50227  | 50732  | 100.0 | 100.0 | 100.0 |
| R6 | RGC18316c  | 31.56 | + | 445  | 0  | 445  | Rsa1.0_00181.1 | 114269 | 92550  | 92995  | 100.0 | 100.0 | 100.0 |

|    |            |       |   |      |    |      |                |        |        |        |       |       |       |
|----|------------|-------|---|------|----|------|----------------|--------|--------|--------|-------|-------|-------|
| R6 | RGC6540c   | 31.56 | + | 475  | 0  | 326  | Rsa1.0_01125.1 | 53193  | 33484  | 33810  | 27.8  | 68.6  | 100.0 |
| R6 | RGA2264s   | 32.04 |   |      |    |      |                |        |        |        |       |       |       |
| R6 | RSS0124    | 32.73 | + | 837  | 0  | 837  | Rsa1.0_00023.1 | 194764 | 83325  | 84532  | 88.3  | 100.0 | 144.2 |
| R6 | RSS2701    | 32.93 | + | 817  | 0  | 817  | Rsa1.0_00835.1 | 278058 | 163058 | 164061 | 98.4  | 100.0 | 122.8 |
| R6 | RS2CL2683s | 33.48 |   |      |    |      |                |        |        |        |       |       |       |
| R6 | RGB14399c  | 33.64 | + | 453  | 0  | 453  | Rsa1.0_00117.1 | 213118 | 48906  | 49441  | 83.9  | 100.0 | 118.1 |
| R6 | CB22       | 34.22 |   |      |    |      |                |        |        |        |       |       |       |
| R6 | RS2CL2041s | 34.53 | - | 631  | 0  | 507  |                | 120234 | 63977  | 64493  | 78.3  | 80.4  | 101.8 |
| R6 | RS2CL6287s | 34.63 | + | 1196 | 2  | 1075 | Rsa1.0_00023.1 | 194764 | 179568 | 180767 | 88.8  | 89.7  | 111.7 |
| R6 | RGC23911c  | 34.9  | - | 525  | 0  | 525  | Rsa1.0_00169.1 | 274298 | 242778 | 243303 | 100.0 | 100.0 | 100.0 |
| R6 | RS2CL3132s | 35.26 | - | 906  | 2  | 885  | Rsa1.0_00900.1 | 60367  | 12162  | 13696  | 95.4  | 97.5  | 173.7 |
| R6 | RSS3180    | 35.5  | - | 348  | 0  | 343  | Rsa1.0_00900.1 | 60367  | 40013  | 40392  | 87.9  | 98.6  | 110.5 |
| R6 | RSS2724    | 36    | - | 784  | 0  | 784  | Rsa1.0_01196.1 | 51097  | 25847  | 27051  | 100.0 | 100.0 | 153.6 |
| R6 | RS2CL7658s | 36.11 | + | 1284 | 8  | 1284 | Rsa1.0_01217.1 | 50554  | 13008  | 14464  | 97.5  | 99.4  | 114.1 |
| R6 | RGC9543c   | 36.42 | - | 480  | 0  | 480  | Rsa1.0_00035.1 | 176449 | 139024 | 139504 | 100.0 | 100.0 | 100.0 |
| R6 | RGB11029c  | 37.42 | + | 474  | 0  | 474  | Rsa1.0_00073.1 | 240924 | 141057 | 141531 | 100.0 | 100.0 | 100.0 |
| R6 | RGC7277c   | 38.15 | + | 546  | 0  | 546  | Rsa1.0_02477.1 | 31058  | 6990   | 7536   | 85.7  | 100.0 | 100.0 |
| R6 | RS2CL2168s | 38.51 | + | 1227 | 1  | 1227 | Rsa1.0_00022.1 | 200461 | 45194  | 46761  | 98.1  | 99.9  | 127.8 |
| R6 | Rs2CL1936s | 39.42 | - | 1057 | 0  | 1055 | Rsa1.0_01613.1 | 182542 | 164106 | 165855 | 99.3  | 99.8  | 165.8 |
| R6 | RSS0895_a  | 39.42 | - | 656  | 0  | 656  | Rsa1.0_00655.1 | 195840 | 136556 | 137707 | 96.2  | 100.0 | 175.5 |
| R6 | RGC17695c  | 40.16 | - | 586  | 0  | 586  | Rsa1.0_00073.1 | 240924 | 231144 | 231730 | 89.8  | 100.0 | 100.0 |
| R6 | RGC3412c   | 40.71 | + | 542  | 0  | 317  | Rsa1.0_00208.1 | 108565 | 40651  | 40968  | 58.5  | 58.5  | 100.0 |
| R6 | RS2CL4724s | 41.51 | + | 900  | 2  | 898  | Rsa1.0_10199.1 | 5948   | 4333   | 5841   | 98.6  | 99.6  | 168.3 |
| R6 | RSS0727    | 41.58 | + | 742  | 0  | 742  | Rsa1.0_00411.1 | 86944  | 44447  | 46038  | 91.2  | 100.0 | 214.4 |
| R6 | RGC11504c  | 41.79 | - | 550  | 0  | 550  | Rsa1.0_00889.1 | 60978  | 3638   | 4188   | 50.7  | 100.0 | 100.0 |
| R6 | RGC28054c  | 41.79 |   |      |    |      |                |        |        |        |       |       |       |
| R6 | RGC5414c   | 41.79 | - | 433  | 0  | 433  | Rsa1.0_01196.1 | 51097  | 29384  | 29817  | 99.3  | 100.0 | 100.0 |
| R6 | RSS2078    | 42.57 | + | 821  | 20 | 810  |                | 240912 | 223707 | 225014 | 90.3  | 96.2  | 165.4 |
| R6 | RGC2511c   | 42.69 | - | 419  | 0  | 419  | Rsa1.0_07573.1 | 9101   | 5681   | 6100   | 91.7  | 100.0 | 100.0 |
| R6 | RGC5771c   | 42.99 | + | 461  | 0  | 461  | Rsa1.0_00501.1 | 79545  | 61953  | 62414  | 100.0 | 100.0 | 100.0 |
| R6 | RSS0254    | 43.26 | - | 836  | 14 | 836  |                | 42964  | 13293  | 14615  | 98.3  | 98.3  | 160.8 |
| R6 | RGC7411c   | 43.37 | + | 483  | 0  | 483  | Rsa1.0_00293.1 | 339294 | 255439 | 255922 | 79.9  | 100.0 | 100.0 |
| R6 | RS2CL5813s | 43.75 | - | 996  | 2  | 996  | Rsa1.0_00585.1 | 74164  | 60680  | 61666  | 95.9  | 99.8  | 99.2  |
| R6 | Rs2CL2197s | 43.82 | - | 1043 | 2  | 949  | Rsa1.0_00208.1 | 108565 | 7688   | 9480   | 86.4  | 90.8  | 189.2 |
| R6 | RGC10969c  | 44.09 | - | 502  | 0  | 502  | Rsa1.0_00421.1 | 86365  | 77105  | 77607  | 100.0 | 100.0 | 100.0 |
| R6 | RGB12188c  | 44.09 | - | 446  | 0  | 446  | Rsa1.0_02188.1 | 34104  | 10003  | 10449  | 100.0 | 100.0 | 100.0 |



|    |            |       |   |      |     |      |                |        |        |        |       |       |       |
|----|------------|-------|---|------|-----|------|----------------|--------|--------|--------|-------|-------|-------|
| R6 | RGC21003c  | 44.09 | - | 438  | 0   | 438  | Rsa1.0_00028.1 | 293984 | 233974 | 234412 | 100.0 | 100.0 | 100.0 |
| R6 | RGC21373c  | 44.09 | + | 503  | 0   | 503  | Rsa1.0_02169.1 | 34367  | 20036  | 20539  | 100.0 | 100.0 | 100.0 |
| R6 | RGC29914c  | 44.09 | - | 473  | 0   | 473  | Rsa1.0_00367.1 | 90750  | 90173  | 90646  | 100.0 | 100.0 | 100.0 |
| R6 | RGC4352c   | 44.09 | + | 401  | 0   | 401  | Rsa1.0_01819.1 | 38834  | 22832  | 23233  | 100.0 | 100.0 | 100.0 |
| R6 | RGB4736c   | 44.09 | + | 527  | 0   | 527  | Rsa1.0_00968.1 | 58020  | 51858  | 52385  | 100.0 | 100.0 | 100.0 |
| R6 | RGC5236c   | 44.09 | - | 448  | 0   | 448  | Rsa1.0_00730.1 | 66673  | 23187  | 23635  | 99.1  | 100.0 | 100.0 |
| R6 | RGC5509c   | 44.09 | + | 472  | 0   | 472  | Rsa1.0_00028.1 | 293984 | 262096 | 262568 | 94.1  | 100.0 | 100.0 |
| R6 | RGC6399c   | 44.09 | - | 591  | 0   | 591  | Rsa1.0_00282.1 | 177799 | 133145 | 133736 | 100.0 | 100.0 | 100.0 |
| R6 | RGC7441c   | 44.09 | - | 497  | 0   | 497  | Rsa1.0_00028.1 | 293984 | 127210 | 127707 | 100.0 | 100.0 | 100.0 |
| R6 | RGC7478c   | 44.09 | - | 405  | 0   | 405  | Rsa1.0_00912.1 | 59923  | 42487  | 42892  | 100.0 | 100.0 | 100.0 |
| R6 | RGB17905c  | 44.13 | - | 420  | 0   | 420  | Rsa1.0_00293.1 | 339294 | 233990 | 234410 | 100.0 | 100.0 | 100.0 |
| R6 | RS2CL3740s | 44.73 | - | 939  | 0   | 939  | Rsa1.0_00293.1 | 339294 | 64751  | 66350  | 98.5  | 100.0 | 170.3 |
| R6 | RGB11249c  | 45.18 | - | 401  | 0   | 401  |                | 152362 | 51456  | 51857  | 100.0 | 100.0 | 100.0 |
| R6 | RGC3081c   | 45.61 | + | 563  | 0   | 173  | Rsa1.0_02538.1 | 30364  | 19470  | 19643  | 30.7  | 30.7  | 100.0 |
| R6 | RS2CL3937s | 46.07 | + | 1499 | 2   | 1499 | Rsa1.0_00028.1 | 293984 | 274461 | 277426 | 97.9  | 99.9  | 198.1 |
| R6 | RS2CL3306s | 46.23 | + | 893  | 0   | 886  | Rsa1.0_00028.1 | 293984 | 131878 | 132778 | 85.2  | 99.2  | 101.6 |
| R6 | RS2CL3718s | 46.39 | + | 770  | 0   | 770  | Rsa1.0_00421.1 | 86365  | 80322  | 81191  | 99.5  | 100.0 | 112.9 |
| R6 | RS2CL6218s | 46.68 | + | 964  | 3   | 964  | Rsa1.0_00028.1 | 293984 | 220625 | 221587 | 87.1  | 99.7  | 100.1 |
| R6 | RGC1448c   | 47.23 | + | 446  | 0   | 446  | Rsa1.0_00540.1 | 76895  | 57024  | 57470  | 100.0 | 100.0 | 100.0 |
| R6 | RS2CL6481s | 47.72 | + | 1067 | 0   | 1067 | Rsa1.0_07573.1 | 9101   | 6007   | 7159   | 95.3  | 100.0 | 108.0 |
| R6 | RS2CL7263s | 48.1  | - | 1063 | 0   | 1063 | Rsa1.0_00564.1 | 75428  | 73601  | 74777  | 96.8  | 100.0 | 110.6 |
| R6 | RGA1805s   | 48.13 |   |      |     |      |                |        |        |        |       |       |       |
| R6 | RS2CL7425s | 48.43 | - | 848  | 150 | 848  | Rsa1.0_00564.1 | 75428  | 60615  | 61342  | 79.6  | 82.3  | 104.2 |
| R6 | RS2CL2511s | 49.5  | - | 663  | 2   | 657  | Rsa1.0_01996.1 | 36327  | 28097  | 29381  | 96.4  | 98.8  | 196.0 |
| R6 | Rs2CL2028s | 50.62 | + | 1328 | 2   | 1328 | Rsa1.0_00540.1 | 76895  | 30884  | 33427  | 93.6  | 99.9  | 191.8 |
| R6 | RS2CL5945s | 51.52 | - | 641  | 1   | 623  | Rsa1.0_00501.1 | 79545  | 21616  | 22321  | 93.5  | 97.0  | 113.3 |
| R6 | RSS2865    | 51.81 | + | 852  | 0   | 852  |                | 152362 | 10790  | 12308  | 99.8  | 100.0 | 178.2 |
| R6 | RS2CL4000s | 52.73 | - | 836  | 3   | 128  | Rsa1.0_06738.1 | 10441  | 5069   | 5194   | 15.0  | 15.0  | 100.0 |
| R6 | RS2CL6161s | 53.18 | + | 822  | 0   | 822  | Rsa1.0_00562.1 | 75565  | 657    | 1858   | 99.0  | 100.0 | 146.1 |
| R6 | RSS0839_a  | 53.55 | + | 806  | 0   | 806  |                | 97747  | 81636  | 82882  | 96.5  | 100.0 | 154.6 |
| R6 | RGC265c    | 53.78 | - | 495  | 0   | 495  | Rsa1.0_00250.1 | 273771 | 182714 | 183209 | 100.0 | 100.0 | 100.0 |
| R6 | RGC4004c   | 53.78 | + | 477  | 0   | 477  | Rsa1.0_01147.1 | 52391  | 42255  | 42732  | 100.0 | 100.0 | 100.0 |
| R6 | RGC6170c   | 53.78 |   |      |     |      |                |        |        |        |       |       |       |
| R6 | RSS3844    | 54.55 | - | 786  | 0   | 653  | Rsa1.0_00252.1 | 102760 | 64039  | 65198  | 80.9  | 83.1  | 177.5 |
| R6 | RS2CL4583s | 54.66 | + | 653  | 2   | 653  | Rsa1.0_00068.1 | 151813 | 72412  | 74048  | 98.8  | 99.7  | 251.3 |
| R6 | RS2CL3419s | 55.3  | - | 1211 | 13  | 1210 | Rsa1.0_00068.1 | 151813 | 97150  | 99692  | 96.9  | 98.8  | 212.4 |

|    |            |       |   |      |    |      |                |        |        |        |       |       |       |
|----|------------|-------|---|------|----|------|----------------|--------|--------|--------|-------|-------|-------|
| R6 | RSS1338    | 55.35 | - | 708  | 0  | 708  | Rsa1.0_00748.1 | 65983  | 63633  | 64407  | 93.5  | 100.0 | 109.3 |
| R6 | RGC2998c   | 56.11 | - | 457  | 0  | 457  | Rsa1.0_00293.1 | 339294 | 336263 | 336720 | 100.0 | 100.0 | 100.0 |
| R6 | CC46H      | 58.44 |   |      |    |      |                |        |        |        |       |       |       |
| R6 | RGA1719s   | 58.61 |   |      |    |      |                |        |        |        |       |       |       |
| R6 | RSS0049    | 59.34 | - | 833  | 0  | 829  | Rsa1.0_00250.1 | 273771 | 5094   | 6645   | 98.7  | 99.5  | 187.1 |
| R6 | RS2CL3836s | 60.14 | + | 903  | 0  | 902  | Rsa1.0_00250.1 | 273771 | 255187 | 256431 | 97.9  | 99.9  | 137.9 |
| R6 | RSS3534    | 60.64 | + | 894  | 0  | 894  |                | 101125 | 12025  | 12995  | 93.2  | 100.0 | 108.5 |
| R6 | RS2CL2788s | 60.89 | + | 649  | 8  | 645  | Rsa1.0_00152.1 | 257730 | 203801 | 204727 | 93.5  | 98.2  | 145.4 |
| R6 | CD99H      | 61.04 |   |      |    |      |                |        |        |        |       |       |       |
| R6 | RGC5574c   | 61.82 | - | 542  | 0  | 542  | Rsa1.0_00259.1 | 163204 | 101488 | 102030 | 81.6  | 100.0 | 100.0 |
| R6 | RGC3577c   | 62.06 | - | 463  | 0  | 328  | Rsa1.0_01551.1 | 43411  | 39072  | 39400  | 41.3  | 70.8  | 100.0 |
| R6 | RGC5793c   | 62.06 |   |      |    |      |                |        |        |        |       |       |       |
| R6 | RS2CL7662s | 62.39 | + | 731  | 0  | 731  | Rsa1.0_01869.1 | 37928  | 6693   | 7424   | 98.2  | 100.0 | 100.0 |
| R6 | RSS3754    | 62.54 | + | 629  | 0  | 629  | Rsa1.0_03626.1 | 160993 | 3901   | 4534   | 81.9  | 100.0 | 100.6 |
| R6 | RS2CL3015s | 63.23 | + | 1405 | 1  | 1404 | Rsa1.0_02080.1 | 35297  | 19033  | 20433  | 98.7  | 99.9  | 99.8  |
| R6 | CD72a      | 63.43 |   |      |    |      |                |        |        |        |       |       |       |
| R6 | OPE03a     | 64.63 |   |      |    |      |                |        |        |        |       |       |       |
| R6 | RS2CL4740s | 64.92 | + | 814  | 7  | 814  | Rsa1.0_05205.1 | 14513  | 13144  | 13953  | 94.2  | 99.1  | 100.3 |
| R6 | RGC893c    | 65.04 | + | 446  | 5  | 446  | Rsa1.0_00199.1 | 249604 | 27368  | 27809  | 98.9  | 98.9  | 100.0 |
| R6 | CB89       | 65.83 |   |      |    |      |                |        |        |        |       |       |       |
| R6 | RSS2657    | 67.03 | + | 342  | 0  | 342  | Rsa1.0_04456.1 | 17260  | 14531  | 15055  | 97.4  | 100.0 | 153.2 |
| R6 | RSS3589    | 67.43 | - | 895  | 0  | 895  | Rsa1.0_01716.1 | 40483  | 32213  | 33725  | 100.0 | 100.0 | 168.9 |
| R6 | RGC12381c  | 67.76 | + | 428  | 0  | 428  | Rsa1.0_01716.1 | 40483  | 29280  | 29708  | 100.0 | 100.0 | 100.0 |
| R6 | RGC8396c   | 68.5  | - | 444  | 0  | 444  | Rsa1.0_01070.1 | 55099  | 16043  | 16487  | 100.0 | 100.0 | 100.0 |
| R6 | RGC24370c  | 68.79 | + | 493  | 0  | 493  | Rsa1.0_00846.1 | 62342  | 57321  | 57814  | 100.0 | 100.0 | 100.0 |
| R6 | Rs2CL2226s | 69.24 | - | 1145 | 15 | 1145 | Rsa1.0_02671.1 | 28887  | 9147   | 10961  | 97.6  | 98.7  | 160.5 |
| R6 | RSS2881    | 69.33 | - | 858  | 0  | 858  | Rsa1.0_01163.1 | 51946  | 15058  | 16317  | 88.6  | 100.0 | 146.7 |
| R6 | RGC11044c  | 70.26 |   |      |    |      |                |        |        |        |       |       |       |
| R6 | RGB10934c  | 71.09 |   |      |    |      |                |        |        |        |       |       |       |
| R6 | RSS2217    | 71.42 | - | 874  | 0  | 874  | Rsa1.0_00450.1 | 139397 | 124138 | 125054 | 99.0  | 100.0 | 104.8 |
| R6 | RS2CL1066s | 72.37 | + | 1017 | 2  | 1016 | Rsa1.0_03978.1 | 19753  | 10156  | 12287  | 99.0  | 99.7  | 210.2 |
| R6 | RSS0782    | 72.42 | + | 670  | 0  | 670  |                | 341668 | 286189 | 286864 | 98.2  | 100.0 | 100.8 |
| R6 | RS2CL7383s | 72.89 | + | 758  | 2  | 758  | Rsa1.0_05581.1 | 13272  | 3853   | 4843   | 98.8  | 99.7  | 131.0 |
| R6 | RS2CL2325s | 73.46 | + | 744  | 0  | 744  | Rsa1.0_00439.1 | 142776 | 57721  | 59666  | 96.6  | 100.0 | 261.4 |
| R6 | CD66       | 73.92 |   |      |    |      |                |        |        |        |       |       |       |
| R6 | RS2CL2832s | 73.95 | + | 1110 | 3  | 1109 | Rsa1.0_00492.1 | 80178  | 65020  | 66126  | 95.1  | 99.6  | 100.0 |



|    |                  |               |   |            |          |            |                       |               |              |              |              |              |              |
|----|------------------|---------------|---|------------|----------|------------|-----------------------|---------------|--------------|--------------|--------------|--------------|--------------|
| R6 | RSS0318          | 96.81         | + | 851        | 0        | 851        | Rsa1.0_03263.1        | 24268         | 20145        | 21184        | 100.0        | 100.0        | 122.1        |
| R6 | RSS1066          | 97.31         | + | 879        | 0        | 879        |                       | 146428        | 130565       | 131525       | 75.3         | 100.0        | 109.2        |
| R6 | RSS0144          | 97.61         | + | 836        | 0        | 836        | Rsa1.0_00861.1        | 61759         | 21693        | 22999        | 76.2         | 100.0        | 156.2        |
| R6 | RSS1276          | 99.11         | + | 589        | 0        | 589        | Rsa1.0_16822.1        | 2022          | 233          | 833          | 90.7         | 100.0        | 101.9        |
| R6 | RS2CL2353s       | 99.2          |   |            |          |            |                       |               |              |              |              |              |              |
| R6 | <b>RGA2249s</b>  | <b>102.93</b> |   |            |          |            |                       |               |              |              |              |              |              |
| R6 | RSS1104          | 103.07        | - | 820        | 0        | 793        | Rsa1.0_28309.1        | 820           | 0            | 794          | 89.5         | 96.7         | 100.1        |
| R6 | RSS1095          | 103.47        | + | 844        | 0        | 844        | Rsa1.0_04293.1        | 18046         | 12236        | 13624        | 100.0        | 100.0        | 164.5        |
| R6 | RSS3864          | 104.67        | - | 892        | 3        | 892        | Rsa1.0_02911.1        | 142461        | 23036        | 24062        | 98.4         | 99.7         | 115.4        |
| R6 | RSS0660          | 105.17        |   |            |          |            |                       |               |              |              |              |              |              |
| R6 | CA92             | 106.57        |   |            |          |            |                       |               |              |              |              |              |              |
| R6 | RS2CL2669s       | 110.66        |   |            |          |            |                       |               |              |              |              |              |              |
| R6 | <b>RGC3431c</b>  | <b>110.9</b>  |   |            |          |            |                       |               |              |              |              |              |              |
| R6 | RS2CL2529s       | 110.93        | - | 889        | 2        | 886        | Rsa1.0_12809.1        | 5119          | 3401         | 4848         | 92.8         | 99.4         | 163.7        |
| R6 | RSS3405          | 112.02        | - | 684        | 0        | 684        | Rsa1.0_07521.1        | 9206          | 6492         | 7391         | 94.7         | 100.0        | 131.4        |
| R6 | RSS1020          | 112.02        | - | 615        | 10       | 614        | Rsa1.0_07521.1        | 9206          | 7688         | 8418         | 93.3         | 98.2         | 120.9        |
| R6 | Rs2CL1769s       | 112.07        | + | 774        | 0        | 774        | Rsa1.0_03223.1        | 24512         | 9371         | 10716        | 99.7         | 100.0        | 173.8        |
| R6 | <b>RGC7305c</b>  | <b>112.65</b> |   |            |          |            |                       |               |              |              |              |              |              |
| R6 | RSS3937          | 113.85        | + | 736        | 0        | 736        | Rsa1.0_05482.1        | 13595         | 4343         | 5505         | 99.2         | 100.0        | 157.9        |
| R6 | RS2CL7280s       | 114.14        | + | 1062       | 0        | 1062       | Rsa1.0_05590.1        | 13242         | 3699         | 4761         | 99.9         | 100.0        | 100.0        |
| R6 | OPT12a           | 115.58        |   |            |          |            |                       |               |              |              |              |              |              |
| R6 | RS2CL7089s       | 115.59        | + | 685        | 2        | 685        | Rsa1.0_03216.1        | 24540         | 23261        | 23945        | 99.0         | 99.7         | 100.2        |
| R6 | <b>RGC11789c</b> | <b>116.51</b> | - | <b>438</b> | <b>0</b> | <b>438</b> | <b>Rsa1.0_03762.1</b> | <b>20976</b>  | <b>6037</b>  | <b>6475</b>  | <b>100.0</b> | <b>100.0</b> | <b>100.0</b> |
| R6 | CA96             | 116.89        |   |            |          |            |                       |               |              |              |              |              |              |
| R6 | RS2CL6447s       | 118.47        |   |            |          |            |                       |               |              |              |              |              |              |
| R6 | RSS3082          | 118.61        | - | 868        | 0        | 864        | Rsa1.0_12370.1        | 5243          | 392          | 1407         | 99.2         | 99.5         | 117.5        |
| R6 | Rs2CL1480s       | 119.54        | + | 632        | 58       | 631        | Rsa1.0_11621.1        | 5457          | 0            | 912          | 89.7         | 90.7         | 159.2        |
| R6 | RS2CL1246s       | 119.59        | + | 983        | 2        | 983        | Rsa1.0_05947.1        | 12142         | 2347         | 3800         | 79.3         | 99.8         | 148.1        |
| R6 | <b>RGC2386c</b>  | <b>120.35</b> |   |            |          |            |                       |               |              |              |              |              |              |
| R6 | <b>RGC9240c</b>  | <b>120.35</b> | - | <b>529</b> | <b>0</b> | <b>529</b> | <b>Rsa1.0_00418.1</b> | <b>215377</b> | <b>60462</b> | <b>60991</b> | <b>90.6</b>  | <b>100.0</b> | <b>100.0</b> |
| R6 | CC65a            | 120.73        |   |            |          |            |                       |               |              |              |              |              |              |
| R6 | OPT16H           | 122.63        |   |            |          |            |                       |               |              |              |              |              |              |
| R6 | RS2CL3093s       | 123.21        | - | 1056       | 0        | 1056       | Rsa1.0_03264.1        | 145959        | 133495       | 135003       | 99.2         | 100.0        | 142.8        |
| R6 | RSS2968          | 124.52        |   |            |          |            |                       |               |              |              |              |              |              |
| R6 | RS2CL7541s       | 124.65        | - | 1237       | 1        | 1237       | Rsa1.0_01000.1        | 57140         | 40267        | 42348        | 99.5         | 99.9         | 168.4        |
| R6 | <b>RGC916c</b>   | <b>126.72</b> | - | <b>476</b> | <b>0</b> | <b>476</b> | <b>Rsa1.0_02007.1</b> | <b>36130</b>  | <b>30993</b> | <b>31469</b> | <b>100.0</b> | <b>100.0</b> | <b>100.0</b> |

|    |            |        |   |      |     |      |                |        |        |        |       |       |       |
|----|------------|--------|---|------|-----|------|----------------|--------|--------|--------|-------|-------|-------|
| R6 | RSS2167    | 127.44 | - | 805  | 0   | 805  | Rsa1.0_00612.1 | 72376  | 36601  | 37848  | 94.4  | 100.0 | 154.9 |
| R6 | RGC17489c  | 128.24 | - | 425  | 0   | 425  | Rsa1.0_03225.1 | 24500  | 18038  | 18463  | 100.0 | 100.0 | 100.0 |
| R6 | Rs2CL2106s | 132.7  | + | 783  | 1   | 781  | Rsa1.0_00348.1 | 92818  | 49682  | 51071  | 97.3  | 99.6  | 178.1 |
| R6 | RGC570c    | 132.71 | - | 497  | 0   | 464  | Rsa1.0_03612.1 | 21784  | 7367   | 7831   | 93.4  | 93.4  | 100.0 |
| R6 | RSS1288    | 133.22 | - | 841  | 0   | 841  | Rsa1.0_00348.1 | 92818  | 5503   | 6343   | 97.7  | 100.0 | 99.9  |
| R6 | RGC14157c  | 133.77 | + | 443  | 0   | 443  | Rsa1.0_02711.1 | 28475  | 24847  | 25290  | 100.0 | 100.0 | 100.0 |
| R6 | RSS2586    | 134.89 |   |      |     |      |                |        |        |        |       |       |       |
| R6 | RSS1469    | 135.6  | + | 580  | 0   | 580  | Rsa1.0_08080.1 | 137363 | 3714   | 4294   | 100.0 | 100.0 | 100.0 |
| R6 | RS2CL7837s | 136.74 | + | 1119 | 2   | 1113 | Rsa1.0_07984.1 | 8130   | 4564   | 6329   | 98.6  | 99.3  | 158.9 |
| R6 | RSS2868    | 137.34 | + | 851  | 177 | 851  | Rsa1.0_05995.1 | 11997  | 2711   | 4104   | 78.7  | 79.2  | 206.7 |
| R6 | RS2CL1111s | 137.74 | - | 1378 | 0   | 1376 | Rsa1.0_01581.1 | 42833  | 391    | 2408   | 97.8  | 99.9  | 146.6 |
| R6 | RSS1670    | 138.04 | - | 881  | 0   | 713  | Rsa1.0_17275.1 | 1874   | 0      | 714    | 78.1  | 80.9  | 100.1 |
| R6 | CC61b      | 138.14 |   |      |     |      |                |        |        |        |       |       |       |
| R6 | RGC1609c   | 138.62 | - | 453  | 0   | 453  | Rsa1.0_01581.1 | 42833  | 1788   | 2241   | 100.0 | 100.0 | 100.0 |
| R6 | RSS0942    | 138.84 | + | 870  | 0   | 870  | Rsa1.0_03300.1 | 23937  | 10198  | 11405  | 99.1  | 100.0 | 138.7 |
| R6 | RSS1084    | 138.84 | - | 743  | 0   | 743  | Rsa1.0_01458.1 | 175719 | 37330  | 38853  | 100.0 | 100.0 | 205.0 |
| R6 | RSS2362    | 139.24 | - | 530  | 5   | 515  | Rsa1.0_03218.1 | 24539  | 22154  | 23021  | 93.0  | 96.2  | 170.0 |
| R6 | RS2CL7123s | 139.45 | + | 710  | 7   | 708  | Rsa1.0_02834.1 | 27493  | 23473  | 24685  | 96.1  | 98.7  | 172.9 |
| R6 | RSS3503    | 139.64 | + | 446  | 3   | 446  |                | 155185 | 137602 | 138127 | 96.2  | 99.3  | 118.5 |
| R6 | RSS0171    | 140.04 | - | 701  | 118 | 699  | Rsa1.0_11073.1 | 5625   | 5044   | 5625   | 81.5  | 82.9  | 100.0 |
| R6 | RGC5431c   | 140.86 | - | 522  | 0   | 522  | Rsa1.0_00639.1 | 165873 | 163086 | 163608 | 100.0 | 100.0 | 100.0 |
| R6 | RSS1190    | 141.24 | - | 823  | 0   | 823  | Rsa1.0_00672.1 | 69358  | 39959  | 41514  | 100.0 | 100.0 | 188.9 |
| R6 | RSS3372    | 142.54 | + | 862  | 16  | 862  | Rsa1.0_01481.1 | 184562 | 2487   | 3334   | 87.5  | 98.1  | 100.1 |
| R6 | RGC1119c   | 142.83 | + | 411  | 0   | 411  | Rsa1.0_00333.1 | 94500  | 26446  | 26857  | 100.0 | 100.0 | 100.0 |
| R6 | RGC1052c   | 143.71 | - | 492  | 0   | 492  | Rsa1.0_03545.1 | 147543 | 16297  | 16789  | 100.0 | 100.0 | 100.0 |
| R6 | RSS1193    | 143.84 | + | 902  | 0   | 902  | Rsa1.0_03506.1 | 22416  | 7445   | 8559   | 96.1  | 100.0 | 123.5 |
| R6 | RGC15890c  | 143.93 | + | 468  | 0   | 468  | Rsa1.0_04022.1 | 19534  | 18955  | 19423  | 100.0 | 100.0 | 100.0 |
| R6 | RS2CL1853s | 144.22 | + | 855  | 2   | 855  | Rsa1.0_00741.1 | 66117  | 63648  | 64653  | 99.3  | 99.8  | 117.8 |
| R6 | RGC23650c  | 144.24 | + | 412  | 0   | 412  | Rsa1.0_00333.1 | 94500  | 68365  | 68777  | 99.3  | 100.0 | 100.0 |
| R6 | RGC7461c   | 144.69 | - | 453  | 0   | 453  | Rsa1.0_00222.1 | 172263 | 67123  | 67576  | 100.0 | 100.0 | 100.0 |
| R6 | RGC4566c   | 145.16 | + | 548  | 0   | 548  | Rsa1.0_00707.1 | 190112 | 182788 | 183336 | 77.4  | 100.0 | 100.0 |
| R6 | RSS0454    | 145.24 | + | 898  | 3   | 898  | Rsa1.0_00472.1 | 398134 | 314463 | 316366 | 95.6  | 99.7  | 212.6 |
| R6 | RS2CL6557s | 145.65 | - | 1007 | 0   | 1007 | Rsa1.0_00865.1 | 61686  | 45497  | 46665  | 96.9  | 100.0 | 116.0 |
| R6 | RS2CL2395s | 145.71 | - | 433  | 0   | 433  | Rsa1.0_00707.1 | 190112 | 52291  | 52722  | 98.4  | 100.0 | 99.5  |
| R6 | RS2CL3438s | 146.12 | + | 1004 | 0   | 325  | Rsa1.0_02086.1 | 35198  | 27598  | 27923  | 29.8  | 32.4  | 100.0 |
| R6 | RS2CL1346s | 146.24 | - | 868  | 0   | 868  | Rsa1.0_03355.1 | 23489  | 14146  | 15084  | 99.4  | 100.0 | 108.1 |

|    |            |        |   |      |    |      |                |        |        |        |       |       |       |
|----|------------|--------|---|------|----|------|----------------|--------|--------|--------|-------|-------|-------|
| R6 | RS2CL8252s | 146.39 |   |      |    |      |                |        |        |        |       |       |       |
| R6 | RSS3153    | 146.44 | + | 442  | 0  | 442  | Rsa1.0_11907.1 | 5374   | 1121   | 1559   | 95.0  | 100.0 | 99.1  |
| R6 | RS2CL6331s | 146.81 | + | 693  | 1  | 693  | Rsa1.0_03355.1 | 23489  | 867    | 1711   | 97.4  | 99.9  | 122.0 |
| R6 | RS2CL934s  | 147.02 | + | 1283 | 82 | 1279 | Rsa1.0_00589.1 | 209965 | 188613 | 190419 | 82.5  | 93.3  | 150.9 |
| R6 | RS2CL4132s | 147.49 | - | 1294 | 0  | 1292 | Rsa1.0_03545.1 | 147543 | 7330   | 8799   | 98.9  | 99.9  | 113.7 |
| R6 | RS2CL4854s | 148.37 | + | 1070 | 1  | 1065 | Rsa1.0_03225.1 | 24500  | 13609  | 15068  | 94.3  | 99.4  | 137.1 |
| R6 | RGAA2337s  | 149.59 |   |      |    |      |                |        |        |        |       |       |       |
| R6 | RGC10645c  | 150.02 | + | 409  | 0  | 409  | Rsa1.0_00222.1 | 172263 | 25497  | 25906  | 100.0 | 100.0 | 100.0 |
| R6 | RGC801c    | 150.02 | - | 593  | 0  | 593  | Rsa1.0_00354.1 | 232005 | 211654 | 212247 | 100.0 | 100.0 | 100.0 |
| R6 | RGC4495c   | 150.16 | - | 470  | 0  | 470  | Rsa1.0_02221.1 | 33796  | 14834  | 15304  | 73.4  | 100.0 | 100.0 |
| R6 | RGB18830c  | 150.21 | - | 535  | 0  | 199  | Rsa1.0_01743.1 | 39926  | 29782  | 29981  | 37.2  | 37.2  | 100.0 |
| R6 | Rs2CL1694s | 150.39 | + | 723  | 2  | 723  | Rsa1.0_00354.1 | 232005 | 168936 | 170776 | 97.9  | 99.7  | 255.2 |
| R6 | RS2CL8102s | 150.96 | + | 748  | 2  | 746  | Rsa1.0_00222.1 | 172263 | 39658  | 41294  | 94.4  | 99.5  | 219.9 |
| R6 | OPR11cH    | 151.04 |   |      |    |      |                |        |        |        |       |       |       |
| R6 | RGC9387c   | 151.43 | + | 420  | 0  | 420  |                | 40243  | 22893  | 23313  | 100.0 | 100.0 | 100.0 |
| R6 | RSS2756    | 151.84 | - | 864  | 0  | 864  | Rsa1.0_00284.1 | 323267 | 132143 | 133526 | 94.9  | 100.0 | 160.1 |
| R6 | RSS1754    | 151.84 | + | 422  | 0  | 422  | Rsa1.0_06010.1 | 11944  | 332    | 758    | 93.4  | 100.0 | 101.0 |
| R6 | RSS3095    | 151.84 | - | 287  | 0  | 287  | Rsa1.0_10379.1 | 5866   | 42     | 329    | 100.0 | 100.0 | 100.0 |
| R6 | RSS2532    | 151.84 |   |      |    |      |                |        |        |        |       |       |       |
| R6 | RS2CL5874s | 152.34 | - | 1037 | 2  | 1036 | Rsa1.0_01408.1 | 46383  | 16660  | 17853  | 90.7  | 99.7  | 115.4 |
| R6 | RGC7168c   | 152.49 | + | 401  | 0  | 401  | Rsa1.0_00183.1 | 113277 | 40294  | 40695  | 38.2  | 100.0 | 100.0 |
| R6 | RSS0166    | 153.24 |   |      |    |      |                |        |        |        |       |       |       |
| R6 | RSS0050    | 153.34 | - | 778  | 0  | 363  | Rsa1.0_02273.1 | 140964 | 28473  | 28836  | 46.5  | 46.7  | 100.0 |
| R6 | RGC5183c   | 153.72 |   |      |    |      |                |        |        |        |       |       |       |
| R6 | CD57       | 153.84 |   |      |    |      |                |        |        |        |       |       |       |
| R6 | RGC17231c  | 154.38 | - | 482  | 0  | 482  | Rsa1.0_07379.1 | 9492   | 3675   | 4157   | 88.4  | 100.0 | 100.0 |
| R6 | RSS1221    | 154.54 | - | 479  | 75 | 479  | Rsa1.0_00201.1 | 232851 | 72717  | 73234  | 70.4  | 84.3  | 128.0 |
| R6 | RS2CL6859s | 154.77 | - | 631  | 0  | 623  | Rsa1.0_08183.1 | 7775   | 4885   | 5650   | 96.4  | 98.7  | 122.8 |
| R6 | RGC5676c   | 155.53 | - | 466  | 0  | 466  | Rsa1.0_00201.1 | 232851 | 31486  | 31952  | 100.0 | 100.0 | 100.0 |
| R6 | RGB14649c  | 157.06 | + | 500  | 0  | 500  | Rsa1.0_00201.1 | 232851 | 103002 | 103502 | 100.0 | 100.0 | 100.0 |
| R6 | RS2CL7316s | 157.61 | - | 1157 | 0  | 1157 | Rsa1.0_00064.1 | 240927 | 219809 | 221135 | 98.3  | 100.0 | 114.6 |
| R6 | RS2CL6976s | 157.63 | - | 965  | 1  | 957  | Rsa1.0_00064.1 | 240927 | 119509 | 120739 | 84.4  | 99.1  | 128.7 |
| R6 | RGB19481c  | 158.25 | + | 538  | 0  | 538  | Rsa1.0_01184.1 | 51452  | 37623  | 38161  | 100.0 | 100.0 | 100.0 |
| R6 | RGB8057c   | 158.25 | + | 441  | 0  | 441  | Rsa1.0_00221.1 | 106972 | 64914  | 65355  | 100.0 | 100.0 | 100.0 |
| R6 | RGC12020c  | 158.47 | + | 487  | 0  | 487  | Rsa1.0_00064.1 | 240927 | 168782 | 169269 | 100.0 | 100.0 | 100.0 |
| R6 | RS2CL8726s | 159.04 | + | 608  | 1  | 608  | Rsa1.0_00201.1 | 232851 | 151369 | 152082 | 99.2  | 99.8  | 117.5 |







|    |            |       |   |      |    |      |                |        |        |        |       |       |        |
|----|------------|-------|---|------|----|------|----------------|--------|--------|--------|-------|-------|--------|
| R7 | Rs2CL2268s | 48.3  | - | 616  | 2  | 614  | Rsa1.0_00291.1 | 172129 | 17348  | 18460  | 97.9  | 99.4  | 181.7  |
| R7 | S          | 48.56 |   |      |    |      |                |        |        |        |       |       |        |
| R7 | RS2CL5832s | 48.58 | - | 860  | 0  | 860  | Rsa1.0_01246.1 | 49968  | 34280  | 35478  | 96.4  | 100.0 | 139.3  |
| R7 | RS2CL4290s | 49.03 | - | 1055 | 2  | 1051 | Rsa1.0_00666.1 | 69505  | 41831  | 43364  | 98.6  | 99.4  | 146.1  |
| R7 | RGC1041c   | 49.35 | + | 495  | 0  | 495  | Rsa1.0_00486.1 | 80875  | 48596  | 49091  | 100.0 | 100.0 | 100.0  |
| R7 | RGC1883c   | 49.35 | + | 459  | 0  | 459  | Rsa1.0_00486.1 | 80875  | 11635  | 12094  | 100.0 | 100.0 | 100.0  |
| R7 | RGC22628c  | 49.35 | - | 430  | 0  | 430  | Rsa1.0_04913.1 | 15464  | 13826  | 14256  | 100.0 | 100.0 | 100.0  |
| R7 | RGC3773c   | 49.35 | - | 423  | 0  | 423  | Rsa1.0_00291.1 | 172129 | 92000  | 92423  | 100.0 | 100.0 | 100.0  |
| R7 | RS2CL2685s | 49.47 | + | 1518 | 0  | 1513 | Rsa1.0_00060.1 | 502678 | 493350 | 496374 | 96.4  | 99.7  | 199.9  |
| R7 | CA52H      | 49.99 |   |      |    |      |                |        |        |        |       |       |        |
| R7 | RGA1801s   | 50.05 |   |      |    |      |                |        |        |        |       |       |        |
| R7 | RS2CL848s  | 50.34 | + | 762  | 1  | 762  | Rsa1.0_00089.1 | 406142 | 228381 | 230027 | 97.8  | 99.9  | 216.3  |
| R7 | RS2CL7649s | 50.38 | - | 800  | 0  | 754  | Rsa1.0_00089.1 | 406142 | 276504 | 277341 | 93.5  | 94.3  | 111.0  |
| R7 | RGC14901c  | 50.95 | - | 509  | 0  | 509  | Rsa1.0_00089.1 | 406142 | 188966 | 189475 | 91.6  | 100.0 | 100.0  |
| R7 | RS2CL2344s | 51.05 | - | 1186 | 1  | 1186 | Rsa1.0_01228.1 | 50238  | 1666   | 3113   | 73.4  | 99.9  | 122.1  |
| R7 | RSS0553    | 51.43 | - | 827  | 0  | 827  | Rsa1.0_01882.1 | 37697  | 13439  | 14774  | 97.7  | 100.0 | 161.4  |
| R7 | RGC8873c   | 51.81 | + | 431  | 0  | 431  | Rsa1.0_01882.1 | 37697  | 1130   | 1561   | 100.0 | 100.0 | 100.0  |
| R7 | RGC9973c   | 51.81 | + | 519  | 0  | 519  | Rsa1.0_01228.1 | 50238  | 8482   | 9001   | 100.0 | 100.0 | 100.0  |
| R7 | RGC26589c  | 52.28 | - | 562  | 0  | 562  | Rsa1.0_00089.1 | 406142 | 100019 | 100581 | 100.0 | 100.0 | 100.0  |
| R7 | RGA200s    | 52.69 |   |      |    |      |                |        |        |        |       |       |        |
| R7 | RSS0291    | 52.99 | - | 640  | 9  | 640  | Rsa1.0_00175.1 | 166121 | 65077  | 71614  | 98.0  | 98.6  | 1036.0 |
| R7 | RS2CL6332s | 53.21 | - | 1248 | 2  | 1248 | Rsa1.0_01882.1 | 37697  | 4755   | 6001   | 93.0  | 99.8  | 100.0  |
| R7 | RGC10939c  | 53.74 | + | 425  | 0  | 425  | Rsa1.0_00502.1 | 204180 | 73218  | 73643  | 100.0 | 100.0 | 100.0  |
| R7 | RS2CL1154s | 54.33 | - | 1035 | 1  | 1033 | Rsa1.0_00175.1 | 166121 | 56235  | 63296  | 88.8  | 99.7  | 684.2  |
| R7 | RGC5695c   | 54.52 | - | 418  | 0  | 418  | Rsa1.0_00175.1 | 166121 | 131751 | 132169 | 84.5  | 100.0 | 100.0  |
| R7 | RGC7132c   | 54.73 | - | 416  | 0  | 416  | Rsa1.0_00175.1 | 166121 | 32954  | 33370  | 100.0 | 100.0 | 100.0  |
| R7 | CA95a      | 55.04 |   |      |    |      |                |        |        |        |       |       |        |
| R7 | RS2CL7750s | 55.11 | - | 691  | 0  | 553  | Rsa1.0_01586.1 | 42804  | 4637   | 5172   | 57.7  | 80.0  | 96.8   |
| R7 | RS2CL4436s | 55.83 | + | 1146 | 18 | 1146 | Rsa1.0_01586.1 | 42804  | 20464  | 21683  | 94.8  | 98.4  | 108.1  |
| R7 | RSS1809    | 56.46 | + | 909  | 98 | 909  | Rsa1.0_02104.1 | 34985  | 25036  | 25808  | 39.6  | 89.2  | 95.2   |
| R7 | RS2CL1077s | 56.55 | + | 1380 | 2  | 1371 | Rsa1.0_02097.1 | 35036  | 17204  | 19468  | 97.3  | 99.2  | 165.4  |
| R7 | RGA63s     | 57.03 |   |      |    |      |                |        |        |        |       |       |        |
| R7 | RGC10094c  | 57.07 | + | 508  | 0  | 508  | Rsa1.0_01321.1 | 48248  | 12575  | 13083  | 100.0 | 100.0 | 100.0  |
| R7 | RGC1124c   | 57.07 | + | 458  | 0  | 458  | Rsa1.0_01410.1 | 46345  | 21463  | 21921  | 100.0 | 100.0 | 100.0  |
| R7 | RGB24589c  | 57.07 |   |      |    |      |                |        |        |        |       |       |        |
| R7 | RGB25459c  | 57.07 | - | 418  | 0  | 418  | Rsa1.0_02097.1 | 35036  | 18446  | 18864  | 100.0 | 100.0 | 100.0  |

|    |            |       |   |      |     |      |                |        |        |        |       |       |       |
|----|------------|-------|---|------|-----|------|----------------|--------|--------|--------|-------|-------|-------|
| R7 | RS2CL6603s | 58.03 | + | 790  | 9   | 790  |                | 606987 | 82145  | 83390  | 97.5  | 98.9  | 159.4 |
| R7 | CC46       | 58.38 |   |      |     |      |                |        |        |        |       |       |       |
| R7 | RS2CL2158s | 58.67 | - | 1200 | 0   | 1198 |                | 606987 | 70233  | 71809  | 93.9  | 99.8  | 131.6 |
| R7 | RGC5019c   | 58.84 | - | 414  | 0   | 414  | Rsa1.0_02104.1 | 34985  | 20368  | 20782  | 100.0 | 100.0 | 100.0 |
| R7 | RS2CL3876s | 58.98 | - | 870  | 1   | 870  | Rsa1.0_02355.1 | 32260  | 7129   | 8615   | 96.6  | 99.9  | 171.0 |
| R7 | RSS0893    | 59.49 | - | 632  | 0   | 632  | Rsa1.0_01238.1 | 50120  | 47449  | 48693  | 100.0 | 100.0 | 196.8 |
| R7 | RSS0043    | 59.69 | - | 703  | 0   | 703  | Rsa1.0_01321.1 | 48248  | 5991   | 6695   | 97.0  | 100.0 | 100.1 |
| R7 | RSS1241    | 59.89 | + | 400  | 0   | 389  | Rsa1.0_00253.1 | 231292 | 132058 | 132447 | 97.3  | 97.3  | 100.0 |
| R7 | RSS1896    | 60.29 | - | 823  | 0   | 823  | Rsa1.0_00253.1 | 231292 | 97440  | 98339  | 100.0 | 100.0 | 109.2 |
| R7 | RSS1737    | 60.69 | + | 791  | 0   | 791  | Rsa1.0_06213.1 | 11478  | 1043   | 1939   | 96.1  | 100.0 | 113.3 |
| R7 | RSS3091    | 61.49 | - | 835  | 2   | 835  | Rsa1.0_04383.1 | 17631  | 10917  | 12511  | 99.6  | 99.8  | 191.4 |
| R7 | RSS2593    | 61.59 | - | 845  | 0   | 845  | Rsa1.0_04383.1 | 17631  | 11236  | 12499  | 100.0 | 100.0 | 149.5 |
| R7 | RSS3615    | 62.19 | + | 769  | 0   | 769  | Rsa1.0_03260.1 | 24284  | 16796  | 17830  | 99.4  | 100.0 | 134.5 |
| R7 | RSS1781    | 62.99 | + | 787  | 0   | 787  | Rsa1.0_01214.1 | 50599  | 35213  | 36182  | 97.6  | 100.0 | 123.1 |
| R7 | Ph         | 65.09 |   |      |     |      |                |        |        |        |       |       |       |
| R7 | R89998     | 65.59 |   |      |     |      |                |        |        |        |       |       |       |
| R7 | RS2CL4343s | 66.48 | + | 733  | 0   | 733  | Rsa1.0_06213.1 | 11478  | 7236   | 8206   | 97.1  | 100.0 | 132.3 |
| R7 | RSS0675    | 66.51 | - | 644  | 26  | 644  | Rsa1.0_02020.1 | 173211 | 168269 | 169361 | 92.4  | 96.0  | 176.7 |
| R7 | RS2CL859s  | 66.54 | + | 938  | 0   | 938  | Rsa1.0_02144.1 | 34630  | 1055   | 2703   | 95.6  | 100.0 | 175.7 |
| R7 | RS2CL6039s | 66.88 | - | 1107 | 1   | 1101 | Rsa1.0_00014.1 | 348985 | 204532 | 205632 | 95.4  | 99.4  | 100.0 |
| R7 | RS2CL3860s | 67.05 | + | 1054 | 0   | 1054 | Rsa1.0_00014.1 | 348985 | 163873 | 165235 | 99.8  | 100.0 | 129.2 |
| R7 | Rs2CL1833s | 67.15 | - | 675  | 2   | 675  | Rsa1.0_00014.1 | 348985 | 219912 | 220928 | 96.4  | 99.7  | 151.0 |
| R7 | RSS0577    | 67.36 | + | 817  | 0   | 817  | Rsa1.0_00014.1 | 348985 | 26937  | 28106  | 99.5  | 100.0 | 143.1 |
| R7 | RS2CL7600s | 67.42 | + | 577  | 2   | 577  | Rsa1.0_00014.1 | 348985 | 174430 | 175005 | 60.7  | 99.7  | 100.0 |
| R7 | RS2CL7455s | 67.69 | - | 820  | 0   | 820  |                | 368722 | 68759  | 69593  | 95.5  | 100.0 | 101.7 |
| R7 | RGB645c    | 67.77 | - | 409  | 178 | 409  | Rsa1.0_07698.1 | 8763   | 2502   | 2733   | 56.5  | 56.5  | 100.0 |
| R7 | RGC6547c   | 67.77 | - | 439  | 0   | 439  | Rsa1.0_02020.1 | 173211 | 4046   | 4485   | 100.0 | 100.0 | 100.0 |
| R7 | RS2CL762s  | 68.17 | - | 778  | 2   | 749  | Rsa1.0_00502.1 | 204180 | 181088 | 181956 | 92.8  | 96.0  | 116.2 |
| R7 | RSS1752    | 68.17 | + | 542  | 0   | 542  |                | 325650 | 304666 | 305381 | 99.6  | 100.0 | 131.9 |
| R7 | RGA1809s   | 68.47 |   |      |     |      |                |        |        |        |       |       |       |
| R7 | RS2CL5281s | 68.86 | + | 1129 | 2   | 1129 | Rsa1.0_00306.1 | 146760 | 54411  | 56154  | 97.4  | 99.8  | 154.7 |
| R7 | RS2CL7601s | 69.33 | - | 1118 | 0   | 1118 | Rsa1.0_01898.1 | 37491  | 18808  | 20247  | 99.2  | 100.0 | 128.7 |
| R7 | RSS1395    | 70.08 | + | 450  | 0   | 450  |                | 368722 | 33228  | 33866  | 87.6  | 100.0 | 141.8 |
| R7 | RGC175c    | 70.15 | + | 483  | 0   | 483  | Rsa1.0_00502.1 | 204180 | 169492 | 169975 | 100.0 | 100.0 | 100.0 |
| R7 | RGC3382c   | 70.15 | - | 449  | 0   | 449  |                | 368722 | 215660 | 216109 | 100.0 | 100.0 | 100.0 |
| R7 | RGC4853c   | 70.15 | - | 404  | 0   | 404  |                | 294827 | 256808 | 257212 | 100.0 | 100.0 | 100.0 |

|    |            |       |   |      |    |      |                |        |        |        |       |       |       |
|----|------------|-------|---|------|----|------|----------------|--------|--------|--------|-------|-------|-------|
| R7 | RGC6940c   | 70.15 | - | 500  | 0  | 500  | Rsa1.0_14410.1 | 3420   | 1223   | 1723   | 87.4  | 100.0 | 100.0 |
| R7 | RS2CL5291s | 70.76 | + | 1201 | 0  | 1200 |                | 294827 | 116377 | 117712 | 92.8  | 99.9  | 111.3 |
| R7 | RS2CL896s  | 71.48 | + | 1344 | 2  | 1342 | Rsa1.0_00247.1 | 103408 | 72149  | 75182  | 99.6  | 99.7  | 226.3 |
| R7 | RS2CL1576s | 71.8  | - | 1182 | 1  | 1182 | Rsa1.0_00247.1 | 103408 | 94048  | 95561  | 99.7  | 99.9  | 128.1 |
| R7 | RS2CL8862s | 72.13 | + | 562  | 1  | 562  | Rsa1.0_01549.1 | 43543  | 41739  | 42303  | 94.1  | 99.8  | 100.5 |
| R7 | RS2CL2861s | 72.54 | - | 1061 | 1  | 1061 | Rsa1.0_00483.1 | 81102  | 27454  | 29750  | 96.7  | 99.9  | 216.6 |
| R7 | RS2CL3030s | 73.07 |   |      |    |      |                |        |        |        |       |       |       |
| R7 | RS2CL6700s | 73.6  | - | 918  | 2  | 918  |                | 325650 | 175948 | 176864 | 99.7  | 99.8  | 100.0 |
| R7 | nga249     | 73.64 |   |      |    |      |                |        |        |        |       |       |       |
| R7 | RGB2012c   | 74.45 | + | 547  | 0  | 547  | Rsa1.0_00247.1 | 103408 | 98357  | 98904  | 100.0 | 100.0 | 100.0 |
| R7 | RGC21683c  | 74.45 | - | 400  | 0  | 400  | Rsa1.0_00816.1 | 403350 | 379804 | 380204 | 100.0 | 100.0 | 100.0 |
| R7 | RGC2749c   | 74.45 | - | 413  | 0  | 413  | Rsa1.0_01933.1 | 37172  | 13243  | 13656  | 100.0 | 100.0 | 100.0 |
| R7 | RGC4411c   | 74.45 | - | 475  | 0  | 475  | Rsa1.0_01182.1 | 167304 | 118700 | 119173 | 99.0  | 100.0 | 99.6  |
| R7 | RGC6888c   | 74.45 | - | 458  | 84 | 458  | Rsa1.0_03698.1 | 21302  | 12840  | 13214  | 81.7  | 81.7  | 100.0 |
| R7 | RGC18584c  | 74.93 | + | 516  | 0  | 516  |                | 325650 | 320016 | 320532 | 100.0 | 100.0 | 100.0 |
| R7 | RS2CL6652s | 75.18 | - | 892  | 2  | 891  |                | 325650 | 109844 | 111119 | 96.3  | 99.7  | 143.4 |
| R7 | RS2CL3415s | 75.68 | - | 838  | 2  | 838  | Rsa1.0_01023.1 | 56571  | 49490  | 50322  | 98.6  | 99.8  | 99.5  |
| R7 | RS2CL7185s | 75.95 | - | 937  | 1  | 937  | Rsa1.0_00570.1 | 75002  | 2447   | 3610   | 96.6  | 99.9  | 124.3 |
| R7 | RGC10310c  | 76.37 | + | 413  | 0  | 413  | Rsa1.0_02664.1 | 28917  | 4762   | 5175   | 100.0 | 100.0 | 100.0 |
| R7 | RS2CL4596s | 76.64 | - | 1240 | 1  | 1235 | Rsa1.0_01933.1 | 37172  | 5060   | 6466   | 96.2  | 99.5  | 113.9 |
| R7 | RSS3362    | 76.72 | + | 865  | 0  | 865  |                | 368722 | 272711 | 273581 | 98.8  | 100.0 | 100.6 |
| R7 | RS2CL2687s | 77.19 | + | 1238 | 4  | 1235 | Rsa1.0_00816.1 | 403350 | 109824 | 111849 | 93.3  | 99.4  | 164.5 |
| R7 | RS2CL7134s | 77.57 | - | 809  | 0  | 809  | Rsa1.0_01078.1 | 316910 | 132829 | 133638 | 99.4  | 100.0 | 100.0 |
| R7 | RS2CL2387s | 77.69 | + | 1338 | 0  | 1338 | Rsa1.0_00816.1 | 403350 | 119747 | 121173 | 86.3  | 100.0 | 106.6 |
| R7 | RS2CL6027s | 77.69 | + | 963  | 1  | 960  | Rsa1.0_00816.1 | 403350 | 113311 | 114334 | 92.7  | 99.6  | 106.7 |
| R7 | RS2CL4568s | 77.82 | - | 842  | 2  | 838  | Rsa1.0_02570.1 | 30000  | 5723   | 6556   | 97.5  | 99.3  | 99.6  |
| R7 | Rs2CL1651s | 78.15 | + | 771  | 0  | 771  | Rsa1.0_00480.1 | 81325  | 52340  | 53356  | 85.0  | 100.0 | 131.8 |
| R7 | CA66       | 78.65 |   |      |    |      |                |        |        |        |       |       |       |
| R7 | RGC1800c   | 78.93 | - | 402  | 0  | 402  | Rsa1.0_00722.1 | 66840  | 19073  | 19475  | 100.0 | 100.0 | 100.0 |
| R7 | RGC591c    | 79.41 | + | 529  | 0  | 529  | Rsa1.0_00287.1 | 98687  | 57086  | 57615  | 93.8  | 100.0 | 100.0 |
| R7 | RS2CL5950s | 79.93 | - | 1170 | 2  | 1170 | Rsa1.0_00676.1 | 69166  | 53701  | 55584  | 94.6  | 99.8  | 161.2 |
| R7 | RS2CL3381s | 80.6  | - | 1677 | 0  | 1677 | Rsa1.0_02269.1 | 33168  | 23244  | 25388  | 96.7  | 100.0 | 127.9 |
| R7 | RS2CL3384s | 81.07 | + | 1003 | 0  | 1003 | Rsa1.0_00722.1 | 66840  | 20201  | 21375  | 99.2  | 100.0 | 117.1 |
| R7 | Rs2CL1984s | 81.23 | - | 873  | 0  | 873  | Rsa1.0_01719.1 | 40388  | 27266  | 28921  | 99.7  | 100.0 | 189.6 |
| R7 | RSS3640    | 81.25 | - | 284  | 0  | 284  | Rsa1.0_00168.1 | 115870 | 41695  | 41979  | 100.0 | 100.0 | 100.0 |
| R7 | RGC12603c  | 82.14 | - | 401  | 0  | 401  | Rsa1.0_01411.1 | 46326  | 16717  | 17118  | 100.0 | 100.0 | 100.0 |

|    |            |       |   |      |   |      |                |        |        |        |       |       |       |
|----|------------|-------|---|------|---|------|----------------|--------|--------|--------|-------|-------|-------|
| R7 | CD87a      | 82.62 |   |      |   |      |                |        |        |        |       |       |       |
| R7 | RGC2185c   | 82.75 | + | 404  | 0 | 404  | Rsa1.0_00016.1 | 831256 | 692591 | 692995 | 100.0 | 100.0 | 100.0 |
| R7 | RGC21966c  | 82.75 |   |      |   |      |                |        |        |        |       |       |       |
| R7 | RGC4797c   | 82.75 |   |      |   |      |                |        |        |        |       |       |       |
| R7 | Rs2CL1884s | 82.82 | + | 1030 | 0 | 1030 | Rsa1.0_01411.1 | 46326  | 22910  | 24368  | 99.3  | 100.0 | 141.6 |
| R7 | RsFLC1s    | 83.04 |   |      |   |      |                |        |        |        |       |       |       |
| R7 | RGA1861s   | 83.25 |   |      |   |      |                |        |        |        |       |       |       |
| R7 | RGB12060c  | 83.54 | + | 419  | 0 | 419  | Rsa1.0_00016.1 | 831256 | 438800 | 439219 | 86.9  | 100.0 | 100.0 |
| R7 | Rs2CL2475s | 83.84 | + | 898  | 0 | 895  | Rsa1.0_00907.1 | 60062  | 1045   | 1936   | 91.3  | 99.7  | 99.6  |
| R7 | RGC11618c  | 84.2  | + | 410  | 0 | 410  | Rsa1.0_00816.1 | 403350 | 118151 | 118561 | 98.8  | 100.0 | 100.0 |
| R7 | CC19       | 84.63 |   |      |   |      |                |        |        |        |       |       |       |
| R7 | RS2CL4523s | 85.11 | + | 1247 | 0 | 1247 | Rsa1.0_00016.1 | 831256 | 58860  | 60779  | 89.7  | 100.0 | 153.9 |
| R7 | RS2CL6940s | 85.26 | - | 462  | 1 | 462  | Rsa1.0_00224.1 | 327530 | 26158  | 27943  | 96.8  | 99.8  | 387.2 |
| R7 | RS2CL3345s | 85.37 | + | 1227 | 2 | 1227 | Rsa1.0_00224.1 | 327530 | 3043   | 5325   | 99.4  | 99.8  | 186.3 |
| R7 | RS2CL5802s | 85.95 | + | 976  | 3 | 976  | Rsa1.0_00218.1 | 201480 | 152478 | 153800 | 97.4  | 99.7  | 135.9 |
| R7 | RGC11896c  | 86.53 |   |      |   |      |                |        |        |        |       |       |       |
| R7 | RGB7818c   | 86.53 |   |      |   |      |                |        |        |        |       |       |       |
| R7 | RGC12721c  | 87.71 |   |      |   |      |                |        |        |        |       |       |       |
| R7 | RGC12875c  | 87.71 |   |      |   |      |                |        |        |        |       |       |       |
| R7 | RGC15411c  | 87.71 |   |      |   |      |                |        |        |        |       |       |       |
| R7 | RGC1662c   | 87.71 |   |      |   |      |                |        |        |        |       |       |       |
| R7 | RGC680c    | 87.71 |   |      |   |      |                |        |        |        |       |       |       |
| R7 | RGC8830c   | 87.71 |   |      |   |      |                |        |        |        |       |       |       |
| R7 | RGC9306c   | 87.71 |   |      |   |      |                |        |        |        |       |       |       |
| R7 | RS2CL1610s | 87.74 | + | 1160 | 2 | 1160 | Rsa1.0_00088.1 | 141341 | 94446  | 96175  | 96.6  | 99.8  | 149.3 |
| R7 | RSS1194    | 88.57 | + | 862  | 0 | 862  | Rsa1.0_00040.1 | 324196 | 39285  | 40382  | 100.0 | 100.0 | 127.3 |
| R7 | SWG7B3     | 89.07 |   |      |   |      |                |        |        |        |       |       |       |
| R7 | RS2CL7086s | 89.22 | + | 718  | 1 | 711  | Rsa1.0_00218.1 | 201480 | 22455  | 23290  | 95.7  | 98.9  | 117.6 |
| R7 | RGB19113c  | 89.63 |   |      |   |      |                |        |        |        |       |       |       |
| R7 | RGC1995c   | 90.67 |   |      |   |      |                |        |        |        |       |       |       |
| R7 | RGB7653c   | 90.67 |   |      |   |      |                |        |        |        |       |       |       |
| R7 | RGC235c    | 90.7  |   |      |   |      |                |        |        |        |       |       |       |
| R7 | RGC4058c   | 90.7  |   |      |   |      |                |        |        |        |       |       |       |
| R7 | RGC4381c   | 90.7  |   |      |   |      |                |        |        |        |       |       |       |
| R7 | CB74       | 90.8  |   |      |   |      |                |        |        |        |       |       |       |
| R7 | Rs2CL2240s | 91.06 | - | 585  | 0 | 585  | Rsa1.0_00047.1 | 168582 | 4450   | 5349   | 98.1  | 100.0 | 153.7 |

|    |            |        |   |      |    |      |                |        |        |        |       |       |       |
|----|------------|--------|---|------|----|------|----------------|--------|--------|--------|-------|-------|-------|
| R7 | RS2CL2738s | 91.23  | + | 696  | 2  | 692  | Rsa1.0_04353.1 | 138437 | 131186 | 132812 | 97.8  | 99.1  | 235.7 |
| R7 | RSS0403    | 92.25  | - | 714  | 0  | 701  | Rsa1.0_00047.1 | 168582 | 149805 | 150497 | 93.0  | 98.2  | 98.7  |
| R7 | RS2CL5276s | 92.65  | + | 1293 | 1  | 1293 | Rsa1.0_00047.1 | 168582 | 66688  | 68502  | 64.9  | 99.9  | 140.4 |
| R7 | RSS0011    | 92.65  |   |      |    |      |                |        |        |        |       |       |       |
| R7 | RS2CL1994s | 93.06  | + | 1355 | 0  | 1355 | Rsa1.0_00075.1 | 146680 | 15883  | 17836  | 96.2  | 100.0 | 144.1 |
| R7 | RS2CL4131s | 93.24  | - | 844  | 0  | 842  | Rsa1.0_00075.1 | 146680 | 26140  | 27221  | 99.4  | 99.8  | 128.4 |
| R7 | RS2CL7414s | 93.6   | + | 1236 | 0  | 1236 | Rsa1.0_04248.1 | 18287  | 3484   | 5852   | 99.1  | 100.0 | 191.6 |
| R7 | RSS2945    | 93.75  | - | 867  | 34 | 867  | Rsa1.0_00373.1 | 90296  | 65873  | 66900  | 96.1  | 96.1  | 123.3 |
| R7 | Rs2CL2199s | 93.75  | - | 1206 | 0  | 1036 | Rsa1.0_03560.1 | 22092  | 6182   | 7868   | 82.4  | 85.9  | 162.7 |
| R7 | RSS1012    | 93.85  | + | 854  | 0  | 854  | Rsa1.0_00075.1 | 146680 | 125344 | 127106 | 99.9  | 100.0 | 206.3 |
| R7 | RGC5308c   | 93.93  |   |      |    |      |                |        |        |        |       |       |       |
| R7 | Rs2CL2272s | 94.18  | + | 1031 | 1  | 1029 | Rsa1.0_01877.1 | 37789  | 33433  | 35144  | 99.0  | 99.7  | 166.4 |
| R7 | RGB4201c   | 94.61  |   |      |    |      |                |        |        |        |       |       |       |
| R7 | RS2CL2679s | 94.78  |   |      |    |      |                |        |        |        |       |       |       |
| R7 | RSS2692    | 96.05  | - | 889  | 0  | 889  | Rsa1.0_03945.1 | 19924  | 15513  | 17381  | 100.0 | 100.0 | 210.1 |
| R7 | RGC3153c   | 96.24  |   |      |    |      |                |        |        |        |       |       |       |
| R7 | RSS1758    | 96.45  | - | 785  | 0  | 761  |                | 68971  | 65835  | 67193  | 60.0  | 96.9  | 178.5 |
| R7 | RSS2706    | 96.55  | + | 514  | 0  | 513  |                | 66155  | 18272  | 18963  | 98.6  | 99.8  | 134.7 |
| R7 | RSS2731    | 96.55  | - | 819  | 0  | 819  | Rsa1.0_04971.1 | 15273  | 6715   | 8640   | 99.9  | 100.0 | 235.0 |
| R7 | RSS1273    | 96.75  | - | 898  | 10 | 862  |                | 68971  | 51542  | 52851  | 67.8  | 94.9  | 153.6 |
| R7 | RSS3991    | 97.05  | - | 858  | 0  | 858  | Rsa1.0_03997.1 | 19652  | 11069  | 11838  | 80.5  | 100.0 | 89.6  |
| R7 | RS2CL3584s | 97.21  | - | 786  | 2  | 774  | Rsa1.0_00931.1 | 59210  | 19149  | 20497  | 95.3  | 98.2  | 174.6 |
| R7 | RS2CL1749s | 98.06  | + | 938  | 2  | 938  | Rsa1.0_03162.1 | 24895  | 18782  | 20173  | 99.0  | 99.8  | 148.6 |
| R7 | RSS1786    | 98.25  | + | 771  | 0  | 771  | Rsa1.0_00129.1 | 126831 | 67022  | 67815  | 56.2  | 100.0 | 102.9 |
| R7 | RSS0080    | 98.35  | + | 721  | 0  | 622  | Rsa1.0_00178.1 | 114861 | 4417   | 5397   | 82.7  | 86.3  | 157.6 |
| R7 | RSS1147    | 98.35  | + | 891  | 0  | 891  | Rsa1.0_00178.1 | 114861 | 66259  | 67652  | 98.8  | 100.0 | 156.3 |
| R7 | RSS1574    | 98.35  | + | 854  | 0  | 854  | Rsa1.0_00178.1 | 114861 | 4482   | 5893   | 83.0  | 100.0 | 165.2 |
| R7 | RSS3973    | 98.35  | - | 811  | 0  | 811  | Rsa1.0_03292.1 | 23977  | 19412  | 20774  | 98.8  | 100.0 | 167.9 |
| R7 | RSS2914_a  | 98.75  | - | 858  | 0  | 854  |                | 99966  | 785    | 2202   | 84.4  | 99.5  | 165.9 |
| R7 | RSS0239    | 99.05  | + | 857  | 17 | 857  | Rsa1.0_01059.1 | 55410  | 28292  | 29120  | 93.0  | 98.0  | 98.6  |
| R7 | CB30b      | 99.65  |   |      |    |      |                |        |        |        |       |       |       |
| R7 | CC61a      | 100.45 |   |      |    |      |                |        |        |        |       |       |       |
| R7 | RGC11328c  | 100.46 |   |      |    |      |                |        |        |        |       |       |       |
| R7 | RGC8546c   | 103.63 |   |      |    |      |                |        |        |        |       |       |       |
| R7 | RGC17372c  | 105.7  |   |      |    |      |                |        |        |        |       |       |       |
| R7 | RSS1523    | 109.85 | - | 840  | 3  | 840  | Rsa1.0_00224.1 | 327530 | 242166 | 243003 | 99.6  | 99.6  | 100.0 |

|    |            |       |   |      |    |      |                |        |        |        |       |       |       |
|----|------------|-------|---|------|----|------|----------------|--------|--------|--------|-------|-------|-------|
| R8 | RGC12178c  | 0     | + | 430  | 0  | 430  | Rsa1.0_00998.1 | 57168  | 13823  | 14253  | 100.0 | 100.0 | 100.0 |
| R8 | RGB6149c   | 1.5   | - | 526  | 0  | 526  | Rsa1.0_00471.1 | 81897  | 58976  | 59502  | 100.0 | 100.0 | 100.0 |
| R8 | RS2CL1123s | 1.72  | - | 965  | 4  | 965  | Rsa1.0_00125.1 | 253043 | 181930 | 183672 | 96.3  | 99.6  | 181.3 |
| R8 | RGC147c    | 2.44  | - | 586  | 0  | 586  | Rsa1.0_03689.1 | 21354  | 16497  | 17083  | 100.0 | 100.0 | 100.0 |
| R8 | RSS3445    | 3.54  | + | 769  | 1  | 769  | Rsa1.0_03894.1 | 20207  | 2551   | 3318   | 89.1  | 99.9  | 99.9  |
| R8 | Rs2CL2236s | 4.21  | + | 823  | 2  | 822  | Rsa1.0_02944.1 | 26553  | 3608   | 4884   | 91.1  | 99.6  | 155.6 |
| R8 | RGC14381c  | 4.67  | + | 486  | 0  | 486  | Rsa1.0_06817.1 | 10307  | 8118   | 8604   | 68.9  | 100.0 | 100.0 |
| R8 | RS2CL5518s | 4.94  | - | 928  | 2  | 928  | Rsa1.0_01444.1 | 169539 | 4693   | 5619   | 99.5  | 99.8  | 100.0 |
| R8 | RS2CL2580s | 5.35  | + | 1458 | 1  | 1458 | Rsa1.0_03820.1 | 20664  | 10041  | 11510  | 94.7  | 99.9  | 100.8 |
| R8 | RGC6104c   | 5.67  | + | 511  | 0  | 511  | Rsa1.0_00658.1 | 69740  | 38849  | 39360  | 100.0 | 100.0 | 100.0 |
| R8 | RSS2533_a  | 7.42  | - | 581  | 0  | 577  | Rsa1.0_01016.1 | 181422 | 44039  | 44904  | 91.6  | 99.3  | 149.9 |
| R8 | RGA1690s   | 7.53  |   |      |    |      |                |        |        |        |       |       |       |
| R8 | RSS0760    | 7.88  | - | 725  | 0  | 725  | Rsa1.0_00950.1 | 58547  | 39573  | 40298  | 99.9  | 100.0 | 100.0 |
| R8 | RS2CL5440s | 8.21  | + | 848  | 0  | 848  | Rsa1.0_03042.1 | 25803  | 8642   | 9965   | 99.9  | 100.0 | 156.0 |
| R8 | OPE20a     | 10.61 |   |      |    |      |                |        |        |        |       |       |       |
| R8 | RSS2626    | 10.91 | + | 707  | 0  | 659  |                | 66432  | 61611  | 62621  | 81.2  | 93.2  | 153.3 |
| R8 | RSS0805    | 11.71 | - | 645  | 0  | 645  | Rsa1.0_02783.1 | 27927  | 8353   | 9224   | 97.7  | 100.0 | 135.0 |
| R8 | RSS1427    | 11.71 | + | 450  | 0  | 450  | Rsa1.0_02813.1 | 27656  | 25359  | 26104  | 99.1  | 100.0 | 165.6 |
| R8 | RSS0092    | 13.91 | + | 718  | 12 | 718  |                | 80937  | 3409   | 4411   | 95.1  | 98.3  | 141.9 |
| R8 | RSS2684    | 14.31 | - | 860  | 0  | 860  | Rsa1.0_00724.1 | 66789  | 8711   | 13143  | 84.1  | 100.0 | 515.4 |
| R8 | RSS2703    | 14.51 | + | 839  | 0  | 685  | Rsa1.0_03884.1 | 20274  | 18022  | 19712  | 81.6  | 81.6  | 246.7 |
| R8 | RSS1899    | 15.21 | + | 748  | 0  | 748  |                | 106231 | 70581  | 71442  | 93.6  | 100.0 | 115.1 |
| R8 | CA87bH     | 15.31 |   |      |    |      |                |        |        |        |       |       |       |
| R8 | RSS3003    | 15.81 | + | 857  | 0  | 857  | Rsa1.0_02922.1 | 26753  | 1412   | 2352   | 100.0 | 100.0 | 109.7 |
| R8 | R30624a    | 16.01 |   |      |    |      |                |        |        |        |       |       |       |
| R8 | R30025     | 16.31 |   |      |    |      |                |        |        |        |       |       |       |
| R8 | BRMS033    | 16.51 |   |      |    |      |                |        |        |        |       |       |       |
| R8 | RSS2613    | 17.01 | - | 929  | 0  | 928  | Rsa1.0_04483.1 | 17174  | 9881   | 11393  | 78.3  | 99.9  | 162.9 |
| R8 | RSS1208    | 17.11 | + | 854  | 0  | 180  | Rsa1.0_01444.1 | 169539 | 132379 | 132560 | 21.0  | 21.1  | 100.6 |
| R8 | RSS3870    | 17.21 | + | 360  | 0  | 360  |                | 251946 | 134173 | 134533 | 82.2  | 100.0 | 100.0 |
| R8 | RSS0974    | 17.41 | - | 864  | 0  | 864  | Rsa1.0_03894.1 | 20207  | 2592   | 4549   | 91.0  | 100.0 | 226.5 |
| R8 | RSS2196    | 17.41 | - | 571  | 0  | 571  | Rsa1.0_02944.1 | 26553  | 10430  | 11223  | 100.0 | 100.0 | 138.9 |
| R8 | RSS0042    | 17.51 | - | 747  | 0  | 747  | Rsa1.0_04493.1 | 17137  | 15711  | 16459  | 87.4  | 100.0 | 100.1 |
| R8 | RS2CL3262s | 19.21 | + | 1177 | 2  | 1172 | Rsa1.0_01616.1 | 42137  | 23432  | 24968  | 97.8  | 99.4  | 131.3 |
| R8 | RGC629c    | 20.26 | - | 403  | 0  | 403  | Rsa1.0_00312.1 | 96765  | 27747  | 28150  | 100.0 | 100.0 | 100.0 |

|    |            |       |   |      |     |      |                |        |       |       |       |       |       |
|----|------------|-------|---|------|-----|------|----------------|--------|-------|-------|-------|-------|-------|
| R8 | CA77       | 20.76 |   |      |     |      |                |        |       |       |       |       |       |
| R8 | RGA2253s   | 21.22 |   |      |     |      |                |        |       |       |       |       |       |
| R8 | CD04       | 21.41 |   |      |     |      |                |        |       |       |       |       |       |
| R8 | RGC8651c   | 21.79 |   |      |     |      |                |        |       |       |       |       |       |
| R8 | RS2CL5213s | 21.81 | + | 1107 | 2   | 1106 | Rsa1.0_05024.1 | 15105  | 11367 | 13003 | 98.0  | 99.7  | 148.2 |
| R8 | RGC2369c   | 22.71 | + | 459  | 0   | 459  | Rsa1.0_02514.1 | 30642  | 5769  | 6228  | 100.0 | 100.0 | 100.0 |
| R8 | RS2CL2117s | 23.07 | + | 1236 | 2   | 1236 | Rsa1.0_00975.1 | 57865  | 5589  | 7040  | 97.7  | 99.8  | 117.6 |
| R8 | RGC3380c   | 23.17 | - | 481  | 0   | 481  | Rsa1.0_02121.1 | 34813  | 19694 | 20175 | 100.0 | 100.0 | 100.0 |
| R8 | RS2CL809s  | 23.49 | + | 1500 | 2   | 1500 | Rsa1.0_01420.1 | 46210  | 6554  | 8942  | 97.6  | 99.9  | 159.4 |
| R8 | RGC10544c  | 23.95 | + | 420  | 0   | 420  | Rsa1.0_02904.1 | 26883  | 25506 | 25926 | 100.0 | 100.0 | 100.0 |
| R8 | RGC10825c  | 23.95 | + | 445  | 0   | 445  | Rsa1.0_00399.1 | 242951 | 2592  | 3037  | 100.0 | 100.0 | 100.0 |
| R8 | RGC1319c   | 23.95 | - | 568  | 0   | 568  | Rsa1.0_02897.1 | 26967  | 3793  | 4361  | 49.7  | 100.0 | 100.0 |
| R8 | RGB16366c  | 23.95 |   |      |     |      |                |        |       |       |       |       |       |
| R8 | RGC2994c   | 23.95 | - | 477  | 0   | 477  | Rsa1.0_02583.1 | 29887  | 6282  | 6759  | 100.0 | 100.0 | 100.0 |
| R8 | RGC8228c   | 23.95 | - | 485  | 0   | 485  | Rsa1.0_05333.1 | 14122  | 10937 | 11422 | 36.3  | 100.0 | 100.0 |
| R8 | RS2CL4855s | 24.03 | + | 1238 | 1   | 1238 | Rsa1.0_00572.1 | 74969  | 61170 | 62482 | 99.0  | 99.9  | 106.1 |
| R8 | RS2CL1406s | 24.21 | + | 808  | 9   | 806  | Rsa1.0_02458.1 | 31197  | 8204  | 9566  | 97.9  | 98.6  | 170.9 |
| R8 | RS2CL3940s | 24.73 | + | 710  | 7   | 562  | Rsa1.0_01129.1 | 52949  | 8750  | 9370  | 73.1  | 78.2  | 111.7 |
| R8 | RS2CL2104s | 24.88 | + | 737  | 2   | 691  | Rsa1.0_03326.1 | 23710  | 16531 | 17547 | 91.2  | 93.5  | 147.5 |
| R8 | RS2CL3538s | 25.82 | - | 1033 | 0   | 1033 | Rsa1.0_00312.1 | 96765  | 88010 | 89867 | 98.6  | 100.0 | 179.8 |
| R8 | RS2CL5211s | 26.82 | + | 613  | 2   | 613  | Rsa1.0_05871.1 | 12356  | 4420  | 5353  | 96.7  | 99.7  | 152.7 |
| R8 | RGC20183c  | 27.25 | + | 479  | 107 | 422  | Rsa1.0_07507.1 | 9231   | 2974  | 3289  | 65.8  | 65.8  | 100.0 |
| R8 | CA91       | 28.52 |   |      |     |      |                |        |       |       |       |       |       |
| R8 | RS2CL3875s | 28.66 | - | 582  | 2   | 582  | Rsa1.0_02893.1 | 26999  | 24275 | 25484 | 94.5  | 99.7  | 208.5 |
| R8 | RS2CL3155s | 29.12 | - | 852  | 37  | 844  | Rsa1.0_00142.1 | 121474 | 62548 | 63430 | 91.0  | 94.7  | 109.3 |
| R8 | Rs2CL1806s | 29.56 |   |      |     |      |                |        |       |       |       |       |       |
| R8 | RGC12354c  | 29.8  | + | 452  | 0   | 452  | Rsa1.0_03121.1 | 25230  | 23859 | 24311 | 100.0 | 100.0 | 100.0 |
| R8 | RGC5581c   | 29.8  | + | 507  | 0   | 479  | Rsa1.0_00794.1 | 64063  | 12363 | 12842 | 94.5  | 94.5  | 100.0 |
| R8 | RSS0790    | 29.82 | + | 771  | 0   | 771  | Rsa1.0_01683.1 | 41059  | 22062 | 23545 | 99.1  | 100.0 | 192.4 |
| R8 | RGC12097c  | 30.29 | + | 515  | 0   | 515  | Rsa1.0_00399.1 | 242951 | 75864 | 76379 | 100.0 | 100.0 | 100.0 |
| R8 | RGC274c    | 31.31 | + | 505  | 0   | 357  | Rsa1.0_02203.1 | 164532 | 1149  | 1506  | 33.1  | 70.7  | 100.0 |
| R8 | RS2CL5594s | 31.39 | - | 1027 | 4   | 1024 | Rsa1.0_02883.1 | 27035  | 2227  | 4340  | 97.0  | 99.3  | 207.2 |
| R8 | RGC20497c  | 31.5  | - | 412  | 0   | 412  | Rsa1.0_03243.1 | 24414  | 11321 | 11733 | 100.0 | 100.0 | 100.0 |
| R8 | RGC5712c   | 31.5  | - | 477  | 0   | 460  | Rsa1.0_00648.1 | 70351  | 36816 | 37276 | 82.8  | 96.4  | 100.0 |
| R8 | RGC7156c   | 31.5  |   |      |     |      |                |        |       |       |       |       |       |
| R8 | RGC484c    | 32    | - | 516  | 0   | 516  | Rsa1.0_03842.1 | 20503  | 1709  | 2225  | 100.0 | 100.0 | 100.0 |

|    |            |       |   |      |    |      |                |        |        |        |       |       |       |
|----|------------|-------|---|------|----|------|----------------|--------|--------|--------|-------|-------|-------|
| R8 | RGC2683c   | 32.63 | - | 470  | 0  | 470  | Rsa1.0_00142.1 | 121474 | 33486  | 33956  | 100.0 | 100.0 | 100.0 |
| R8 | RS2CL5411s | 32.94 | - | 995  | 4  | 980  | Rsa1.0_01702.1 | 40722  | 17654  | 18640  | 95.8  | 98.1  | 101.0 |
| R8 | RS2CL4559s | 33.61 | + | 898  | 1  | 898  |                | 390088 | 70420  | 71980  | 96.4  | 99.9  | 173.9 |
| R8 | RS2CL5083s | 33.61 | + | 829  | 1  | 829  | Rsa1.0_00288.1 | 98659  | 79985  | 81050  | 98.2  | 99.9  | 128.6 |
| R8 | CA57H      | 33.7  |   |      |    |      |                |        |        |        |       |       |       |
| R8 | RSS0053    | 34.1  | - | 544  | 0  | 544  | Rsa1.0_02802.1 | 27736  | 10820  | 11525  | 96.5  | 100.0 | 129.6 |
| R8 | RS2CL5831s | 34.39 | + | 809  | 8  | 795  |                | 267193 | 103761 | 104554 | 90.1  | 97.3  | 100.8 |
| R8 | RSS1433    | 36.43 | - | 848  | 0  | 848  | Rsa1.0_00288.1 | 98659  | 88951  | 90352  | 96.0  | 100.0 | 165.2 |
| R8 | RSS4002    | 36.43 | + | 600  | 0  | 600  | Rsa1.0_00246.1 | 103541 | 42070  | 42670  | 100.0 | 100.0 | 100.0 |
| R8 | RGC4518c   | 36.63 | - | 464  | 0  | 464  | Rsa1.0_02556.1 | 30133  | 5066   | 5530   | 68.1  | 100.0 | 100.0 |
| R8 | RS2CL1252s | 37.79 | - | 780  | 17 | 780  | Rsa1.0_08317.1 | 7554   | 1841   | 2605   | 96.0  | 97.8  | 100.1 |
| R8 | CB75H      | 38.06 |   |      |    |      |                |        |        |        |       |       |       |
| R8 | CC88bH     | 39.96 |   |      |    |      |                |        |        |        |       |       |       |
| R8 | RGC14573c  | 40.23 | - | 454  | 0  | 454  | Rsa1.0_02503.1 | 30709  | 27639  | 28093  | 100.0 | 100.0 | 100.0 |
| R8 | RSS0294    | 41.44 | - | 693  | 10 | 693  |                | 167018 | 31475  | 32158  | 94.2  | 98.6  | 100.0 |
| R8 | RGC173c    | 41.86 | - | 432  | 0  | 432  | Rsa1.0_00997.1 | 57190  | 37779  | 38211  | 100.0 | 100.0 | 100.0 |
| R8 | RGC2807c   | 41.86 | - | 421  | 0  | 399  | Rsa1.0_00523.1 | 178770 | 36457  | 36856  | 42.8  | 94.8  | 100.0 |
| R8 | CC72       | 42.41 |   |      |    |      |                |        |        |        |       |       |       |
| R8 | RS2CL1403s | 44.41 | + | 1224 | 2  | 1224 | Rsa1.0_03607.1 | 21817  | 1505   | 4226   | 99.4  | 99.8  | 222.7 |
| R8 | RSS0615    | 44.92 | + | 728  | 13 | 718  | Rsa1.0_01487.1 | 44784  | 313    | 1390   | 83.0  | 96.8  | 152.8 |
| R8 | RSS1330    | 45.72 |   |      |    |      |                |        |        |        |       |       |       |
| R8 | RSS1747    | 46.62 | + | 838  | 0  | 838  | Rsa1.0_01041.1 | 55910  | 37195  | 38034  | 99.6  | 100.0 | 100.1 |
| R8 | RS2CL6221s | 47.94 | + | 1281 | 1  | 1281 | Rsa1.0_01722.1 | 40320  | 32574  | 33855  | 99.3  | 99.9  | 100.1 |
| R8 | T75662     | 48.28 |   |      |    |      |                |        |        |        |       |       |       |
| R8 | RSS1844    | 48.88 | + | 820  | 0  | 820  | Rsa1.0_02688.1 | 28644  | 16173  | 17249  | 100.0 | 100.0 | 131.2 |
| R8 | RS2CL1646s | 49.21 | - | 941  | 3  | 939  | Rsa1.0_01112.1 | 310601 | 31111  | 32228  | 89.3  | 99.5  | 119.3 |
| R8 | RSS1680    | 49.37 | - | 795  | 1  | 795  | Rsa1.0_02092.1 | 35135  | 27158  | 27953  | 99.9  | 99.9  | 100.1 |
| R8 | RS2CL2780s | 50.36 | + | 871  | 2  | 810  | Rsa1.0_01660.1 | 41400  | 31295  | 32703  | 86.7  | 92.8  | 174.3 |
| R8 | Rs2CL2111s | 50.69 | + | 955  | 2  | 953  |                | 49419  | 35521  | 37478  | 98.2  | 99.6  | 205.8 |
| R8 | RSS3270    | 51.11 | + | 827  | 0  | 827  | Rsa1.0_01377.1 | 46967  | 13163  | 14171  | 96.9  | 100.0 | 121.9 |
| R8 | RGC9390c   | 51.14 | - | 426  | 0  | 426  |                | 283362 | 66423  | 66849  | 100.0 | 100.0 | 100.0 |
| R8 | RGC10000c  | 51.69 | + | 417  | 13 | 417  | Rsa1.0_00410.1 | 86957  | 25583  | 25987  | 96.9  | 96.9  | 100.0 |
| R8 | RGC5417c   | 51.69 |   |      |    |      |                |        |        |        |       |       |       |
| R8 | RSS2735    | 51.76 | + | 756  | 0  | 756  | Rsa1.0_01112.1 | 310601 | 48350  | 49184  | 99.3  | 100.0 | 110.3 |
| R8 | CA88N      | 52.46 |   |      |    |      |                |        |        |        |       |       |       |
| R8 | RS2CL4240s | 52.61 | - | 1333 | 1  | 1297 | Rsa1.0_01633.1 | 41868  | 6820   | 8814   | 95.5  | 97.2  | 153.9 |



|    |            |       |   |      |     |      |                |        |        |        |       |       |       |
|----|------------|-------|---|------|-----|------|----------------|--------|--------|--------|-------|-------|-------|
| R8 | RS2CL5626s | 53.34 | + | 935  | 0   | 935  | Rsa1.0_01377.1 | 46967  | 19801  | 21943  | 97.5  | 100.0 | 229.1 |
| R8 | CC15H      | 53.49 |   |      |     |      |                |        |        |        |       |       |       |
| R8 | RS2CL5288s | 54.18 | + | 1302 | 1   | 1302 | Rsa1.0_01377.1 | 46967  | 8613   | 10006  | 89.3  | 99.9  | 107.1 |
| R8 | RGC2076c   | 55.59 | - | 485  | 0   | 485  | Rsa1.0_00007.1 | 239325 | 224811 | 225296 | 100.0 | 100.0 | 100.0 |
| R8 | RSS0305    | 56.55 | + | 261  | 0   | 261  | Rsa1.0_00188.1 | 112020 | 4679   | 4941   | 100.0 | 100.0 | 100.4 |
| R8 | RSS1175    | 56.55 | + | 337  | 0   | 337  | Rsa1.0_06288.1 | 11302  | 312    | 649    | 100.0 | 100.0 | 100.0 |
| R8 | RGC11890c  | 56.96 | - | 465  | 0   | 465  | Rsa1.0_21829.1 | 1170   | 94     | 559    | 86.7  | 100.0 | 100.0 |
| R8 | RGC14479c  | 58.07 | + | 424  | 0   | 424  | Rsa1.0_00007.1 | 239325 | 98262  | 98686  | 100.0 | 100.0 | 100.0 |
| R8 | ACGM23     | 58.99 |   |      |     |      |                |        |        |        |       |       |       |
| R8 | RS2CL1940s | 59.21 |   |      |     |      |                |        |        |        |       |       |       |
| R8 | CC13       | 60.13 |   |      |     |      |                |        |        |        |       |       |       |
| R8 | Rs2CL1970s | 60.24 | - | 657  | 0   | 657  |                | 396176 | 93367  | 94313  | 98.2  | 100.0 | 144.0 |
| R8 | RGC16204c  | 60.99 | - | 548  | 0   | 548  |                | 365886 | 334329 | 334877 | 100.0 | 100.0 | 100.0 |
| R8 | RSS2248    | 61.37 | - | 820  | 0   | 686  | Rsa1.0_00007.1 | 239325 | 214773 | 215462 | 77.9  | 83.7  | 100.4 |
| R8 | RS2CL3284s | 61.75 | + | 608  | 0   | 593  | Rsa1.0_00007.1 | 239325 | 118003 | 118885 | 84.7  | 97.5  | 148.7 |
| R8 | RGC3490c   | 62.11 | - | 596  | 0   | 596  | Rsa1.0_02161.1 | 34459  | 13112  | 13708  | 100.0 | 100.0 | 100.0 |
| R8 | RS2CL1179s | 62.29 | + | 1450 | 0   | 1449 | Rsa1.0_00007.1 | 239325 | 14077  | 16181  | 93.9  | 99.9  | 145.2 |
| R8 | RS2CL4152s | 62.99 | - | 1044 | 20  | 1041 | Rsa1.0_00403.1 | 87701  | 43775  | 45321  | 96.3  | 97.8  | 151.4 |
| R8 | RSS0073    | 63    | + | 684  | 0   | 680  |                | 365886 | 323535 | 324434 | 95.2  | 99.4  | 132.2 |
| R8 | RGC8307c   | 63.9  | - | 495  | 111 | 495  |                | 365886 | 191819 | 192203 | 77.6  | 77.6  | 100.0 |
| R8 | RSS3326    | 64.45 | + | 272  | 0   | 272  | Rsa1.0_01828.1 | 38681  | 33028  | 33302  | 94.9  | 100.0 | 100.7 |
| R8 | Rs2CL1468s | 64.49 | - | 794  | 0   | 794  | Rsa1.0_01923.1 | 37233  | 35386  | 36734  | 89.7  | 100.0 | 169.8 |
| R8 | RGC8839c   | 65.26 | - | 516  | 0   | 516  |                | 365886 | 140708 | 141224 | 100.0 | 100.0 | 100.0 |
| R8 | RGC258c    | 65.62 | + | 418  | 0   | 418  | Rsa1.0_00128.1 | 228675 | 66405  | 66823  | 100.0 | 100.0 | 100.0 |
| R8 | RGC14352c  | 65.76 | + | 467  | 0   | 467  | Rsa1.0_04198.1 | 18504  | 13658  | 14125  | 99.8  | 100.0 | 100.0 |
| R8 | RGC6994c   | 65.76 | + | 414  | 0   | 414  | Rsa1.0_00128.1 | 228675 | 118269 | 118683 | 100.0 | 100.0 | 100.0 |
| R8 | RS2CL881s  | 66.05 | - | 831  | 3   | 831  | Rsa1.0_00944.1 | 58733  | 41317  | 42542  | 82.2  | 99.6  | 148.0 |
| R8 | RGC2153c   | 66.26 | + | 405  | 0   | 405  |                | 396176 | 292160 | 292565 | 79.3  | 100.0 | 100.0 |
| R8 | RS2CL1475s | 66.86 | - | 621  | 0   | 621  | Rsa1.0_08027.1 | 8058   | 6814   | 7435   | 92.1  | 100.0 | 100.0 |
| R8 | RGC26764c  | 67.25 | - | 437  | 0   | 437  |                | 396176 | 376963 | 377400 | 100.0 | 100.0 | 100.0 |
| R8 | RSS3178    | 67.32 | + | 572  | 0   | 572  |                | 396176 | 18606  | 19179  | 96.5  | 100.0 | 100.2 |
| R8 | RSS3174    | 67.72 | + | 870  | 20  | 870  |                | 396176 | 186748 | 187737 | 94.1  | 97.7  | 116.4 |
| R8 | RGC19563c  | 68.79 | + | 423  | 0   | 423  | Rsa1.0_00215.1 | 201775 | 93860  | 94283  | 100.0 | 100.0 | 100.0 |
| R8 | RSS0382    | 69.5  | - | 644  | 0   | 644  |                | 396176 | 304667 | 306127 | 100.0 | 100.0 | 226.7 |
| R8 | RSS3738    | 69.5  | + | 744  | 0   | 744  |                | 396176 | 296029 | 296774 | 68.6  | 100.0 | 100.1 |
| R8 | RGC2170c   | 69.95 | - | 566  | 0   | 566  | Rsa1.0_00504.1 | 79334  | 16654  | 17220  | 100.0 | 100.0 | 100.0 |

|    |            |       |   |      |    |      |                |        |        |        |       |       |       |
|----|------------|-------|---|------|----|------|----------------|--------|--------|--------|-------|-------|-------|
| R8 | RGC18537c  | 70.29 | + | 478  | 0  | 478  | Rsa1.0_02198.1 | 33989  | 15073  | 15551  | 100.0 | 100.0 | 100.0 |
| R8 | RSS0919    | 71.15 | + | 736  | 0  | 736  | Rsa1.0_00114.1 | 131330 | 124837 | 126422 | 99.7  | 100.0 | 215.4 |
| R8 | RS2CL1250s | 71.23 | + | 1168 | 2  | 1168 | Rsa1.0_00914.1 | 59880  | 12954  | 14120  | 45.8  | 99.8  | 100.0 |
| R8 | RGC15683c  | 71.86 | - | 595  | 46 | 595  | Rsa1.0_00437.1 | 84879  | 62178  | 62727  | 77.5  | 92.3  | 100.0 |
| R8 | RSS2610    | 72.12 | + | 374  | 0  | 374  | Rsa1.0_00215.1 | 201775 | 3123   | 3594   | 100.0 | 100.0 | 125.9 |
| R8 | RS2CL5401s | 72.43 | - | 1293 | 1  | 1293 | Rsa1.0_01976.1 | 36570  | 7806   | 10214  | 98.1  | 99.9  | 186.4 |
| R8 | RS2CL7655s | 72.61 | - | 824  | 1  | 824  | Rsa1.0_01976.1 | 36570  | 33617  | 34533  | 99.9  | 99.9  | 111.3 |
| R8 | RSS2489    | 72.61 | - | 814  | 10 | 814  | Rsa1.0_00114.1 | 131330 | 8757   | 11009  | 98.8  | 98.8  | 280.1 |
| R8 | RGC1653c   | 73.01 | - | 533  | 0  | 533  | Rsa1.0_01143.1 | 52456  | 42346  | 42879  | 72.6  | 100.0 | 100.0 |
| R8 | RGC17676c  | 73.01 | - | 429  | 0  | 429  | Rsa1.0_02449.1 | 31292  | 8268   | 8697   | 99.1  | 100.0 | 100.0 |
| R8 | RGB14459c  | 73.15 | - | 448  | 0  | 448  | Rsa1.0_00114.1 | 131330 | 100984 | 101432 | 100.0 | 100.0 | 100.0 |
| R8 | OPR20      | 73.34 |   |      |    |      |                |        |        |        |       |       |       |
| R8 | Rs2CL1478s | 73.69 | - | 1018 | 1  | 1018 | Rsa1.0_04243.1 | 18321  | 2896   | 4619   | 98.4  | 99.9  | 169.4 |
| R8 | RGB11843c  | 73.9  | + | 456  | 0  | 456  | Rsa1.0_00133.1 | 123768 | 52751  | 53207  | 93.4  | 100.0 | 100.0 |
| R8 | RSS1585    | 74.03 | + | 845  | 1  | 845  | Rsa1.0_01422.1 | 46172  | 16387  | 17717  | 67.8  | 99.9  | 157.6 |
| R8 | RGC8853c   | 74.38 | + | 408  | 0  | 408  | Rsa1.0_01422.1 | 46172  | 27604  | 28012  | 100.0 | 100.0 | 100.0 |
| R8 | RS2CL3498s | 74.55 | - | 651  | 1  | 648  | Rsa1.0_02179.1 | 34188  | 23622  | 24419  | 97.1  | 99.4  | 123.2 |
| R8 | RS2CL5877s | 75.73 | + | 799  | 1  | 799  | Rsa1.0_00133.1 | 123768 | 66297  | 67096  | 97.9  | 99.9  | 100.1 |
| R8 | RSS1295    | 75.84 | - | 437  | 0  | 238  | Rsa1.0_18041.1 | 1683   | 1441   | 1679   | 54.5  | 54.5  | 100.0 |
| R8 | Rs2CL1741s | 76.98 | - | 746  | 3  | 745  | Rsa1.0_04741.1 | 16164  | 7118   | 8332   | 99.1  | 99.5  | 163.6 |
| R8 | RS2CL3268s | 77.62 | + | 935  | 3  | 840  | Rsa1.0_01668.1 | 41299  | 18574  | 19690  | 82.5  | 89.5  | 133.3 |
| R8 | RSS0229    | 78.36 | + | 777  | 0  | 777  | Rsa1.0_04741.1 | 16164  | 5332   | 6388   | 94.9  | 100.0 | 135.9 |
| R8 | RS2CL5368s | 78.58 | - | 1046 | 1  | 1046 | Rsa1.0_00034.1 | 260119 | 121393 | 122572 | 98.0  | 99.9  | 112.8 |
| R8 | RSS0066    | 78.94 | + | 685  | 9  | 685  | Rsa1.0_05641.1 | 13077  | 7245   | 7902   | 94.3  | 98.7  | 97.2  |
| R8 | RS2CL2922s | 79.04 | + | 1283 | 1  | 1283 | Rsa1.0_00549.1 | 76473  | 33491  | 34901  | 96.3  | 99.9  | 110.0 |
| R8 | RS2CL3626s | 79.45 | + | 805  | 0  | 805  | Rsa1.0_00034.1 | 260119 | 77363  | 78246  | 71.4  | 100.0 | 109.7 |
| R8 | RSS2460    | 79.51 | - | 927  | 49 | 926  | Rsa1.0_01561.1 | 43227  | 38328  | 39984  | 90.4  | 94.6  | 188.8 |
| R8 | RSS2434    | 79.81 | - | 734  | 0  | 734  |                | 77375  | 52445  | 53875  | 91.7  | 100.0 | 194.8 |
| R8 | RSS2901    | 80.01 | + | 850  | 0  | 850  | Rsa1.0_00153.1 | 192931 | 4421   | 5271   | 75.4  | 100.0 | 100.0 |
| R8 | RS2CL4706s | 80.14 | + | 777  | 1  | 776  | Rsa1.0_04128.1 | 18927  | 11475  | 12891  | 99.7  | 99.7  | 182.7 |
| R8 | RSS3034    | 80.67 | + | 542  | 0  | 542  | Rsa1.0_00153.1 | 192931 | 86721  | 87264  | 99.8  | 100.0 | 100.2 |
| R8 | RS2CL5634s | 80.88 | + | 870  | 0  | 869  | Rsa1.0_01789.1 | 39250  | 12709  | 14191  | 96.4  | 99.9  | 170.5 |
| R8 | RSS0327    | 80.95 | - | 804  | 0  | 804  | Rsa1.0_00153.1 | 192931 | 110170 | 111937 | 98.3  | 100.0 | 219.8 |
| R8 | RSS3614    | 81.25 | + | 858  | 14 | 858  | Rsa1.0_00153.1 | 192931 | 37475  | 38357  | 92.1  | 98.4  | 104.5 |
| R8 | RS2CL1509s | 82.09 | + | 1888 | 5  | 1887 | Rsa1.0_00020.1 | 283099 | 54912  | 57213  | 93.1  | 99.7  | 122.3 |
| R8 | RSS2378    | 82.3  | + | 898  | 0  | 898  | Rsa1.0_00163.1 | 116847 | 44448  | 45740  | 100.0 | 100.0 | 143.9 |

|    |            |       |   |      |     |      |                |        |        |        |       |       |       |
|----|------------|-------|---|------|-----|------|----------------|--------|--------|--------|-------|-------|-------|
| R8 | RGC11743c  | 82.42 | - | 498  | 0   | 498  | Rsa1.0_00153.1 | 192931 | 18859  | 19357  | 100.0 | 100.0 | 100.0 |
| R8 | RSS3078    | 82.59 | + | 875  | 0   | 875  | Rsa1.0_02453.1 | 31271  | 12105  | 14237  | 99.9  | 100.0 | 243.7 |
| R8 | RS2CL1319s | 82.66 |   |      |     |      |                |        |        |        |       |       |       |
| R8 | RS2CL5849s | 82.67 | - | 348  | 156 | 348  | Rsa1.0_00163.1 | 116847 | 75920  | 76111  | 50.3  | 55.2  | 99.5  |
| R8 | RS2CL5318s | 82.87 | + | 1240 | 1   | 1240 |                | 48033  | 25520  | 26759  | 99.8  | 99.9  | 100.0 |
| R8 | Rs2CL2338s | 82.96 | + | 946  | 1   | 942  | Rsa1.0_00163.1 | 116847 | 10438  | 11897  | 97.2  | 99.5  | 155.1 |
| R8 | RS2CL3001s | 83.11 | - | 853  | 0   | 853  | Rsa1.0_00020.1 | 283099 | 14473  | 15326  | 78.7  | 100.0 | 100.0 |
| R8 | RS2CL7379s | 83.72 | - | 716  | 2   | 491  | Rsa1.0_00020.1 | 283099 | 101648 | 102448 | 66.5  | 68.3  | 163.6 |
| R8 | RGC5306c   | 83.97 | + | 462  | 0   | 462  | Rsa1.0_00163.1 | 116847 | 98693  | 99155  | 100.0 | 100.0 | 100.0 |
| R8 | RGC8280c   | 83.97 | + | 431  | 0   | 431  | Rsa1.0_00497.1 | 79830  | 16297  | 16728  | 100.0 | 100.0 | 100.0 |
| R8 | RGB8542c   | 83.97 | + | 525  | 0   | 525  | Rsa1.0_01920.1 | 158533 | 29914  | 30451  | 97.3  | 100.0 | 102.3 |
| R8 | RGB8994c   | 83.97 | - | 451  | 0   | 451  | Rsa1.0_00153.1 | 192931 | 113499 | 113950 | 100.0 | 100.0 | 100.0 |
| R8 | RS2CL7544s | 84.27 | - | 885  | 1   | 885  | Rsa1.0_06021.1 | 11911  | 4386   | 5466   | 97.4  | 99.9  | 122.2 |
| R8 | RSS2157    | 84.62 | - | 651  | 19  | 651  | Rsa1.0_00020.1 | 283099 | 75564  | 77039  | 97.1  | 97.1  | 233.4 |
| R8 | RS2CL1601s | 84.74 | - | 1098 | 2   | 1098 | Rsa1.0_01758.1 | 39747  | 36639  | 38270  | 96.6  | 99.8  | 148.8 |
| R8 | RSS3273    | 84.81 | + | 888  | 0   | 888  | Rsa1.0_00020.1 | 283099 | 58219  | 59281  | 83.5  | 100.0 | 119.6 |
| R8 | RS2CL7685s | 85.42 | - | 729  | 0   | 729  | Rsa1.0_00157.1 | 245832 | 76427  | 77641  | 95.3  | 100.0 | 166.5 |
| R8 | RS2CL2573s | 85.44 | - | 1108 | 3   | 1087 | Rsa1.0_00273.1 | 326186 | 3138   | 5148   | 92.2  | 97.8  | 185.4 |
| R8 | RS2CL1983s | 85.58 | - | 1262 | 3   | 1262 | Rsa1.0_00273.1 | 326186 | 137299 | 139314 | 98.0  | 99.8  | 160.1 |
| R8 | RS2CL5298s | 85.75 | + | 1163 | 3   | 1163 | Rsa1.0_00157.1 | 245832 | 182201 | 184322 | 87.9  | 99.7  | 182.8 |
| R8 | RS2CL5635s | 85.91 | + | 705  | 0   | 705  | Rsa1.0_01561.1 | 43227  | 20408  | 21392  | 96.5  | 100.0 | 139.6 |
| R8 | RGB3215c   | 86.15 | - | 428  | 0   | 428  | Rsa1.0_00273.1 | 326186 | 305626 | 306054 | 100.0 | 100.0 | 100.0 |
| R8 | RSS0027    | 86.26 | - | 661  | 0   | 661  | Rsa1.0_01326.1 | 48072  | 44499  | 45168  | 94.0  | 100.0 | 101.2 |
| R8 | RS2CL2296s | 86.45 |   |      |     |      |                |        |        |        |       |       |       |
| R8 | RS2CL3554s | 86.87 | + | 588  | 0   | 588  | Rsa1.0_00157.1 | 245832 | 160095 | 160881 | 97.1  | 100.0 | 133.7 |
| R8 | RSS1843    | 87.06 | + | 843  | 0   | 843  | Rsa1.0_02544.1 | 30290  | 464    | 1883   | 100.0 | 100.0 | 168.3 |
| R8 | RS2CL4310s | 87.42 | - | 707  | 0   | 707  | Rsa1.0_00157.1 | 245832 | 236064 | 236848 | 76.8  | 100.0 | 110.9 |
| R8 | RGC10842c  | 87.68 | + | 408  | 0   | 408  | Rsa1.0_00273.1 | 326186 | 146279 | 146687 | 100.0 | 100.0 | 100.0 |
| R8 | RGC13395c  | 87.68 | - | 499  | 0   | 499  | Rsa1.0_00157.1 | 245832 | 215954 | 216453 | 100.0 | 100.0 | 100.0 |
| R8 | RGC3413c   | 87.68 | - | 428  | 0   | 428  | Rsa1.0_00157.1 | 245832 | 61029  | 61457  | 100.0 | 100.0 | 100.0 |
| R8 | RGB3288c   | 87.87 |   |      |     |      |                |        |        |        |       |       |       |
| R8 | RGC989c    | 87.87 | + | 464  | 0   | 464  | Rsa1.0_01435.1 | 45942  | 16462  | 16926  | 100.0 | 100.0 | 100.0 |
| R8 | RSS2286    | 88.06 |   |      |     |      |                |        |        |        |       |       |       |
| R8 | RS2CL3341s | 88.21 | - | 955  | 2   | 955  |                | 222544 | 29888  | 31613  | 98.9  | 99.8  | 181.0 |
| R8 | RS2CL6784s | 88.37 | + | 792  | 2   | 792  | Rsa1.0_00097.1 | 138858 | 49719  | 51303  | 99.8  | 99.8  | 200.5 |
| R8 | RGC4722c   | 88.59 | - | 537  | 0   | 537  | Rsa1.0_00097.1 | 138858 | 137097 | 137634 | 100.0 | 100.0 | 100.0 |

|    |            |        |   |      |    |      |                |        |        |        |       |       |       |
|----|------------|--------|---|------|----|------|----------------|--------|--------|--------|-------|-------|-------|
| R8 | RGC9339c   | 88.59  | - | 530  | 0  | 530  | Rsa1.0_00161.1 | 116891 | 105405 | 105935 | 100.0 | 100.0 | 100.0 |
| R8 | CC50       | 89.36  |   |      |    |      |                |        |        |        |       |       |       |
| R8 | RGC13159c  | 89.51  | + | 415  | 0  | 415  | Rsa1.0_01920.1 | 158533 | 132946 | 133361 | 100.0 | 100.0 | 100.0 |
| R8 | RS2CL2944s | 90.15  | - | 1216 | 2  | 1216 | Rsa1.0_01920.1 | 158533 | 22466  | 23718  | 86.3  | 99.8  | 103.1 |
| R8 | Z17993     | 90.36  |   |      |    |      |                |        |        |        |       |       |       |
| R8 | CB80       | 91.26  |   |      |    |      |                |        |        |        |       |       |       |
| R8 | RGB3124c   | 92.24  | + | 418  | 0  | 418  |                | 396176 | 2267   | 2685   | 100.0 | 100.0 | 100.0 |
| R8 | RGC7108c   | 92.24  | + | 400  | 0  | 400  | Rsa1.0_02143.1 | 34632  | 17843  | 18243  | 100.0 | 100.0 | 100.0 |
| R8 | CB80N      | 93.36  |   |      |    |      |                |        |        |        |       |       |       |
| R8 | CA22bH     | 100.66 |   |      |    |      |                |        |        |        |       |       |       |
| R8 | RSS3836    | 101.36 | + | 845  | 19 | 775  | Rsa1.0_00145.1 | 261008 | 232062 | 232914 | 85.7  | 89.5  | 112.7 |
| R9 | PK9        | 0      |   |      |    |      |                |        |        |        |       |       |       |
| R9 | CA88       | 5.8    |   |      |    |      |                |        |        |        |       |       |       |
| R9 | RSS1006_a  | 8.5    | + | 831  | 0  | 831  |                | 247766 | 78313  | 79707  | 97.5  | 100.0 | 167.8 |
| R9 | RSS0129    | 11     | + | 678  | 0  | 662  | Rsa1.0_02529.1 | 30437  | 20009  | 20981  | 97.5  | 97.6  | 146.8 |
| R9 | RSS2168    | 12.3   | - | 434  | 0  | 434  | Rsa1.0_00525.1 | 78030  | 9014   | 9450   | 100.0 | 100.0 | 100.5 |
| R9 | RSS2147    | 12.5   | + | 476  | 0  | 394  | Rsa1.0_01538.1 | 43733  | 28494  | 28886  | 80.0  | 82.8  | 99.5  |
| R9 | RGA1576s   | 12.9   |   |      |    |      |                |        |        |        |       |       |       |
| R9 | RSS4036    | 13.5   | - | 150  | 0  | 150  | Rsa1.0_01388.1 | 46741  | 12576  | 12726  | 98.7  | 100.0 | 100.0 |
| R9 | RS2CL7699s | 14.59  | - | 854  | 0  | 854  | Rsa1.0_00688.1 | 68396  | 37209  | 38191  | 93.9  | 100.0 | 115.0 |
| R9 | RGA1547s   | 15.36  |   |      |    |      |                |        |        |        |       |       |       |
| R9 | RS2CL3487s | 16.04  | - | 1045 | 0  | 1045 | Rsa1.0_02680.1 | 28721  | 17984  | 19028  | 99.3  | 100.0 | 99.9  |
| R9 | RSS2321    | 17.62  | + | 846  | 0  | 846  | Rsa1.0_00264.1 | 101674 | 39504  | 40350  | 74.4  | 100.0 | 100.0 |
| R9 | RSS1369    | 18.26  | - | 870  | 0  | 852  | Rsa1.0_00012.1 | 222148 | 170982 | 172306 | 96.0  | 97.9  | 155.4 |
| R9 | RS2CL1156s | 18.9   | - | 1171 | 0  | 1170 | Rsa1.0_01947.1 | 36977  | 10478  | 12576  | 41.2  | 99.9  | 179.3 |
| R9 | RS2CL1885s | 19.14  | + | 952  | 0  | 951  | Rsa1.0_05411.1 | 13838  | 7560   | 8511   | 97.9  | 99.9  | 100.0 |
| R9 | RSS1177    | 19.52  | + | 493  | 0  | 493  | Rsa1.0_00170.1 | 179538 | 83207  | 83802  | 73.6  | 100.0 | 120.7 |
| R9 | RGC15483c  | 20.02  | - | 468  | 0  | 468  | Rsa1.0_01273.1 | 49464  | 38274  | 38742  | 100.0 | 100.0 | 100.0 |
| R9 | RGB21440c  | 20.02  | - | 531  | 0  | 531  | Rsa1.0_00920.1 | 601703 | 12282  | 12813  | 96.1  | 100.0 | 100.0 |
| R9 | RGC22512c  | 20.02  | + | 567  | 0  | 567  | Rsa1.0_00857.1 | 61904  | 30303  | 30870  | 100.0 | 100.0 | 100.0 |
| R9 | RGC4199c   | 20.02  | - | 400  | 0  | 400  | Rsa1.0_03310.1 | 23851  | 23022  | 23422  | 100.0 | 100.0 | 100.0 |
| R9 | RGC4665c   | 20.02  | + | 497  | 0  | 497  | Rsa1.0_01980.1 | 36544  | 32515  | 33012  | 99.4  | 100.0 | 100.0 |
| R9 | RS2CL1281s | 20.2   | + | 1311 | 1  | 1309 | Rsa1.0_03454.1 | 149870 | 144058 | 145866 | 99.5  | 99.8  | 138.2 |
| R9 | RS2CL2288s | 21.02  | + | 1245 | 2  | 1245 | Rsa1.0_02800.1 | 27760  | 12372  | 13978  | 81.7  | 99.8  | 129.2 |
| R9 | RSS3821    | 21.87  | - | 840  | 2  | 840  | Rsa1.0_00699.1 | 184398 | 40640  | 41463  | 91.0  | 99.8  | 98.2  |



|    |            |       |   |      |     |      |                |        |        |        |       |       |       |
|----|------------|-------|---|------|-----|------|----------------|--------|--------|--------|-------|-------|-------|
| R9 | RSS1337    | 35.76 | - | 718  | 8   | 718  | Rsa1.0_00610.1 | 72740  | 44429  | 45158  | 95.8  | 98.9  | 102.7 |
| R9 | RSS1870    | 36.56 |   |      |     |      |                |        |        |        |       |       |       |
| R9 | RS2CL1098s | 36.65 | + | 959  | 2   | 959  | Rsa1.0_13994.1 | 3941   | 838    | 2341   | 97.3  | 99.8  | 157.1 |
| R9 | RS2CL3458s | 36.88 | - | 785  | 1   | 626  | Rsa1.0_21931.1 | 1162   | 73     | 698    | 77.7  | 79.6  | 100.0 |
| R9 | RGC683c    | 37.96 | + | 449  | 0   | 449  | Rsa1.0_04234.1 | 18378  | 712    | 1161   | 67.5  | 100.0 | 100.0 |
| R9 | RSS1790    | 39.11 | - | 316  | 0   | 316  | Rsa1.0_06508.1 | 10874  | 3035   | 3429   | 90.5  | 100.0 | 124.7 |
| R9 | CA73       | 39.31 |   |      |     |      |                |        |        |        |       |       |       |
| R9 | RGB7901c   | 40.43 |   |      |     |      |                |        |        |        |       |       |       |
| R9 | RS2CL4013s | 41.08 |   |      |     |      |                |        |        |        |       |       |       |
| R9 | OPR11aH    | 46.84 |   |      |     |      |                |        |        |        |       |       |       |
| R9 | RSS2112    | 47.14 | - | 677  | 16  | 673  | Rsa1.0_00254.1 | 102600 | 73227  | 74045  | 93.4  | 97.1  | 124.5 |
| R9 | RS2CL1950s | 47.68 |   |      |     |      |                |        |        |        |       |       |       |
| R9 | RSS0897    | 48.06 |   |      |     |      |                |        |        |        |       |       |       |
| R9 | RS2CL6276s | 48.47 | + | 1308 | 44  | 1308 | Rsa1.0_02276.1 | 33098  | 11898  | 13388  | 76.4  | 96.6  | 117.9 |
| R9 | RS2CL1162s | 48.59 | + | 598  | 2   | 595  | Rsa1.0_00254.1 | 102600 | 83341  | 84508  | 96.2  | 99.2  | 196.8 |
| R9 | RSS1696_a  | 48.78 |   |      |     |      |                |        |        |        |       |       |       |
| R9 | RGC20593c  | 49.53 | - | 541  | 0   | 541  | Rsa1.0_03359.1 | 23466  | 8512   | 9053   | 78.6  | 100.0 | 100.0 |
| R9 | RSS1592    | 50.09 |   |      |     |      |                |        |        |        |       |       |       |
| R9 | RSS0706    | 50.49 | - | 780  | 0   | 780  | Rsa1.0_00561.1 | 75653  | 4647   | 5687   | 95.0  | 100.0 | 133.3 |
| R9 | RSS2916    | 50.69 | - | 837  | 0   | 833  | Rsa1.0_03639.1 | 21629  | 2457   | 3420   | 93.8  | 99.5  | 115.6 |
| R9 | RS2CL5504s | 51.19 | + | 1093 | 4   | 1093 | Rsa1.0_03972.1 | 19787  | 11929  | 13999  | 97.8  | 99.6  | 190.1 |
| R9 | RGC2630c   | 51.3  | + | 499  | 0   | 499  | Rsa1.0_04873.1 | 15657  | 2775   | 3274   | 100.0 | 100.0 | 100.0 |
| R9 | RSS1660    | 51.61 | - | 911  | 0   | 911  | Rsa1.0_08001.1 | 8095   | 611    | 1503   | 69.6  | 100.0 | 97.9  |
| R9 | RGA178s    | 52.61 |   |      |     |      |                |        |        |        |       |       |       |
| R9 | RGC6878c   | 53.04 |   |      |     |      |                |        |        |        |       |       |       |
| R9 | RGC607c    | 53.57 | + | 425  | 0   | 425  | Rsa1.0_00231.1 | 105381 | 15704  | 16129  | 100.0 | 100.0 | 100.0 |
| R9 | RS2CL5261s | 53.82 | + | 670  | 2   | 670  | Rsa1.0_03361.1 | 23456  | 3213   | 3881   | 69.7  | 99.7  | 100.0 |
| R9 | CA53aH     | 54.57 |   |      |     |      |                |        |        |        |       |       |       |
| R9 | RS2CL6424s | 54.76 | - | 1234 | 0   | 1233 | Rsa1.0_02927.1 | 26698  | 23077  | 24309  | 98.4  | 99.9  | 99.9  |
| R9 | RS2CL7401s | 55.84 | - | 1103 | 2   | 1103 | Rsa1.0_03572.1 | 146346 | 140674 | 141943 | 94.6  | 99.8  | 115.3 |
| R9 | RSS2661    | 56.33 |   |      |     |      |                |        |        |        |       |       |       |
| R9 | RSS3495    | 59.43 |   |      |     |      |                |        |        |        |       |       |       |
| R9 | RS2CL1353s | 60.82 | - | 1261 | 0   | 1261 | Rsa1.0_08609.1 | 7132   | 4843   | 6433   | 98.3  | 100.0 | 126.1 |
| R9 | RSS2934    | 62.05 | + | 818  | 0   | 816  | Rsa1.0_00606.1 | 73150  | 29752  | 30846  | 99.8  | 99.8  | 134.1 |
| R9 | RGB15272c  | 62.2  | - | 532  | 307 | 532  | Rsa1.0_06409.1 | 11067  | 4147   | 4372   | 36.5  | 42.3  | 100.0 |
| R9 | RSS0404    | 63.19 | + | 820  | 0   | 820  | Rsa1.0_00606.1 | 73150  | 29776  | 31133  | 100.0 | 100.0 | 165.5 |

|    |            |       |   |      |   |      |                |        |        |        |       |       |       |
|----|------------|-------|---|------|---|------|----------------|--------|--------|--------|-------|-------|-------|
| R9 | RS2CL1092s | 63.52 | + | 1141 | 2 | 1141 | Rsa1.0_05815.1 | 12563  | 8444   | 10050  | 99.7  | 99.8  | 141.0 |
| R9 | RS2CL3798s | 63.86 | + | 748  | 1 | 744  | Rsa1.0_01812.1 | 38956  | 24043  | 24787  | 91.8  | 99.3  | 100.1 |
| R9 | RGB2773c   | 63.88 | + | 426  | 0 | 426  | Rsa1.0_04299.1 | 18027  | 17498  | 17924  | 84.5  | 100.0 | 100.0 |
| R9 | RGC7838c   | 63.88 | + | 585  | 0 | 585  | Rsa1.0_10699.1 | 5752   | 3639   | 4224   | 100.0 | 100.0 | 100.0 |
| R9 | RS2CL4941s | 63.97 | - | 1177 | 0 | 1177 | Rsa1.0_02330.1 | 32452  | 415    | 1944   | 98.8  | 100.0 | 129.9 |
| R9 | CC62H      | 65.01 |   |      |   |      |                |        |        |        |       |       |       |
| R9 | Rs2CL2460s | 65.4  | + | 654  | 0 | 653  | Rsa1.0_06052.1 | 11848  | 6622   | 7513   | 98.2  | 99.9  | 136.5 |
| R9 | RS2CL3791s | 66.13 | - | 617  | 2 | 615  | Rsa1.0_00994.1 | 165189 | 136079 | 136901 | 97.6  | 99.4  | 134.1 |
| R9 | RS2CL1061s | 66.44 | - | 1093 | 0 | 1092 |                | 495407 | 250482 | 251576 | 67.5  | 99.9  | 100.2 |
| R9 | RGC3132c   | 66.69 |   |      |   |      |                |        |        |        |       |       |       |
| R9 | CC37aH     | 66.77 |   |      |   |      |                |        |        |        |       |       |       |
| R9 | RS2CL1946s | 67.44 | - | 776  | 1 | 776  | Rsa1.0_06535.1 | 10827  | 3273   | 4045   | 96.9  | 99.9  | 99.6  |
| R9 | RS2CL3879s | 67.92 | + | 1326 | 1 | 1326 | Rsa1.0_04565.1 | 16837  | 2922   | 4732   | 92.7  | 99.9  | 136.6 |
| R9 | CC11H      | 68.69 |   |      |   |      |                |        |        |        |       |       |       |
| R9 | RGC7876c   | 68.84 | - | 475  | 0 | 475  | Rsa1.0_00132.1 | 124299 | 30474  | 30949  | 100.0 | 100.0 | 100.0 |
| R9 | RGC17699c  | 69.55 | - | 526  | 0 | 526  | Rsa1.0_00132.1 | 124299 | 114729 | 115254 | 98.9  | 100.0 | 99.8  |
| R9 | RGC21716c  | 69.55 | - | 494  | 0 | 494  | Rsa1.0_02695.1 | 28605  | 27902  | 28396  | 85.0  | 100.0 | 100.0 |
| R9 | RS2CL2047s | 70.11 | - | 822  | 2 | 796  | Rsa1.0_06663.1 | 10576  | 7668   | 8993   | 88.7  | 96.6  | 166.9 |
| R9 | F15571     | 70.94 |   |      |   |      |                |        |        |        |       |       |       |
| R9 | RS2CL6991s | 71.22 | + | 1172 | 2 | 1172 | Rsa1.0_10113.1 | 5992   | 1703   | 3027   | 98.3  | 99.8  | 113.2 |
| R9 | RGC10800c  | 71.67 | + | 464  | 0 | 464  | Rsa1.0_00061.1 | 218685 | 65016  | 65480  | 100.0 | 100.0 | 100.0 |
| R9 | RGB21550c  | 71.67 | + | 456  | 0 | 456  | Rsa1.0_02128.1 | 34758  | 20966  | 21422  | 100.0 | 100.0 | 100.0 |
| R9 | RGB6475c   | 71.67 | - | 520  | 0 | 520  | Rsa1.0_00435.1 | 317579 | 62135  | 62655  | 100.0 | 100.0 | 100.0 |
| R9 | RGC13816c  | 71.99 | - | 509  | 0 | 509  | Rsa1.0_00435.1 | 317579 | 26116  | 26625  | 91.6  | 100.0 | 100.0 |
| R9 | Rs2CL1347s | 72.64 | + | 848  | 2 | 848  | Rsa1.0_00276.1 | 100160 | 94494  | 96125  | 97.9  | 99.8  | 192.8 |
| R9 | CC83       | 73.17 |   |      |   |      |                |        |        |        |       |       |       |
| R9 | RGC12399c  | 73.22 | - | 528  | 0 | 528  | Rsa1.0_01620.1 | 42091  | 4893   | 5421   | 83.5  | 100.0 | 100.0 |
| R9 | Rs2CL2196s | 73.8  | + | 881  | 2 | 881  | Rsa1.0_04511.1 | 17032  | 3480   | 5212   | 90.6  | 99.8  | 197.0 |
| R9 | RS2CL964s  | 74.73 | - | 585  | 2 | 585  | Rsa1.0_00435.1 | 317579 | 70702  | 71725  | 98.3  | 99.7  | 175.5 |
| R9 | RSS1474    | 75.03 | - | 788  | 0 | 788  | Rsa1.0_00378.1 | 89892  | 72451  | 73334  | 100.0 | 100.0 | 112.1 |
| R9 | RGC7982c   | 75.19 | + | 462  | 0 | 462  |                | 194198 | 30114  | 30576  | 100.0 | 100.0 | 100.0 |
| R9 | RS2CL7317s | 75.75 | + | 1355 | 1 | 1355 | Rsa1.0_11496.1 | 5485   | 1373   | 2739   | 32.8  | 99.9  | 100.9 |
| R9 | RSS1063    | 76.03 | + | 866  | 1 | 866  | Rsa1.0_03546.1 | 22172  | 12865  | 14073  | 95.6  | 99.9  | 139.7 |
| R9 | RS2CL6758s | 76.06 | - | 680  | 2 | 680  | Rsa1.0_03191.1 | 145762 | 134763 | 135439 | 95.3  | 99.7  | 99.7  |
| R9 | OPT17H     | 77.07 |   |      |   |      |                |        |        |        |       |       |       |
| R9 | RGB4147c   | 77.1  | - | 470  | 0 | 470  | Rsa1.0_00954.1 | 189536 | 8277   | 8747   | 93.2  | 100.0 | 100.0 |





|    |            |        |   |      |    |      |                |        |        |        |       |       |       |
|----|------------|--------|---|------|----|------|----------------|--------|--------|--------|-------|-------|-------|
| R9 | OPT09b     | 108.7  |   |      |    |      |                |        |        |        |       |       |       |
| R9 | RSS2575    | 111.7  | + | 874  | 0  | 874  | Rsa1.0_00942.1 | 58873  | 48955  | 49830  | 100.0 | 100.0 | 100.1 |
| R9 | RSS1301    | 112.3  | - | 710  | 0  | 710  | Rsa1.0_00942.1 | 58873  | 24148  | 24858  | 97.5  | 100.0 | 100.0 |
| R9 | RGC2698c   | 113.43 | + | 455  | 0  | 455  | Rsa1.0_00942.1 | 58873  | 48716  | 49171  | 100.0 | 100.0 | 100.0 |
| R9 | RGC8995c   | 113.43 | + | 401  | 0  | 401  | Rsa1.0_00942.1 | 58873  | 9690   | 10090  | 55.6  | 100.0 | 99.8  |
| R9 | RGA236s    | 113.58 |   |      |    |      |                |        |        |        |       |       |       |
| R9 | Rs2CL1221s | 114.17 | - | 935  | 2  | 935  | Rsa1.0_02820.1 | 27629  | 22434  | 24062  | 98.3  | 99.8  | 174.5 |
| R9 | RGC7515c   | 115.38 | - | 435  | 0  | 435  | Rsa1.0_00045.1 | 328694 | 196928 | 197363 | 68.5  | 100.0 | 100.0 |
| R9 | RS2CL4042s | 115.45 | - | 687  | 1  | 687  | Rsa1.0_00045.1 | 328694 | 131772 | 132624 | 79.3  | 99.9  | 124.2 |
| R9 | RS2CL7387s | 115.76 | + | 813  | 0  | 813  | Rsa1.0_00045.1 | 328694 | 231371 | 232758 | 94.2  | 100.0 | 170.6 |
| R9 | RS2CL2007s | 115.93 | + | 954  | 1  | 842  | Rsa1.0_00045.1 | 328694 | 175470 | 176392 | 85.9  | 88.2  | 109.6 |
| R9 | CD11bH     | 116.39 |   |      |    |      |                |        |        |        |       |       |       |
| R9 | RGC1736c   | 117.63 | + | 540  | 0  | 540  | Rsa1.0_00560.1 | 75685  | 52946  | 53486  | 100.0 | 100.0 | 100.0 |
| R9 | RS2CL7327s | 117.9  | - | 1057 | 60 | 1056 |                | 75219  | 26633  | 27890  | 74.2  | 94.2  | 126.2 |
| R9 | RS2CL6327s | 118.34 | - | 925  | 1  | 922  | Rsa1.0_00323.1 | 159650 | 113373 | 115513 | 98.2  | 99.6  | 232.4 |
| R9 | RGC13248c  | 118.48 | + | 405  | 9  | 405  | Rsa1.0_04138.1 | 18898  | 8896   | 9292   | 97.8  | 97.8  | 100.0 |
| R9 | Rs2CL2203s | 118.74 | - | 811  | 2  | 811  |                | 75219  | 16111  | 17983  | 99.6  | 99.8  | 231.4 |
| R9 | RGB15203c  | 118.97 | - | 437  | 0  | 437  | Rsa1.0_00038.1 | 314568 | 243571 | 244008 | 100.0 | 100.0 | 100.0 |
| R9 | RS2CL2614s | 119.09 | - | 1045 | 0  | 1044 | Rsa1.0_02312.1 | 32675  | 15842  | 16886  | 99.8  | 99.9  | 100.0 |
| R9 | RGA2478s   | 119.76 |   |      |    |      |                |        |        |        |       |       |       |
| R9 | RSS1954    | 119.83 | + | 837  | 0  | 837  | Rsa1.0_00038.1 | 314568 | 264516 | 266426 | 98.1  | 100.0 | 228.2 |
| R9 | RS2CL6430s | 120.43 | + | 1009 | 0  | 1009 | Rsa1.0_02130.1 | 34755  | 20489  | 21902  | 85.6  | 100.0 | 140.0 |
| R9 | RGC14934c  | 121.15 | - | 442  | 0  | 442  | Rsa1.0_00753.1 | 65705  | 42738  | 43180  | 100.0 | 100.0 | 100.0 |
| R9 | RS2CL5708s | 121.78 | + | 626  | 4  | 626  | Rsa1.0_01119.1 | 53459  | 35842  | 36562  | 98.2  | 99.4  | 115.8 |
| R9 | RGC6292c   | 123.13 | + | 531  | 0  | 531  | Rsa1.0_00414.1 | 202190 | 47223  | 47754  | 64.0  | 100.0 | 100.0 |
| R9 | RGC9998c   | 123.13 | - | 529  | 0  | 529  | Rsa1.0_04103.1 | 19048  | 3572   | 4101   | 83.2  | 100.0 | 100.0 |
| R9 | RSS2285    | 123.16 | - | 858  | 0  | 858  | Rsa1.0_00038.1 | 314568 | 146073 | 146959 | 84.9  | 100.0 | 103.3 |
| R9 | RGC6034c   | 123.28 | + | 405  | 0  | 405  | Rsa1.0_00118.1 | 130637 | 129809 | 130214 | 100.0 | 100.0 | 100.0 |
| R9 | RGC7030c   | 123.28 | + | 521  | 0  | 484  | Rsa1.0_00118.1 | 130637 | 50086  | 50570  | 92.9  | 92.9  | 100.0 |
| R9 | CA34a      | 123.73 |   |      |    |      |                |        |        |        |       |       |       |
| R9 | CC16       | 124.23 |   |      |    |      |                |        |        |        |       |       |       |
| R9 | RGC5701c   | 124.31 | - | 411  | 0  | 411  | Rsa1.0_00056.1 | 332604 | 111788 | 112199 | 100.0 | 100.0 | 100.0 |
| R9 | RGB12822c  | 125.73 | + | 569  | 0  | 569  | Rsa1.0_04095.1 | 19095  | 10902  | 11421  | 91.2  | 100.0 | 91.2  |
| R9 | RGB19618c  | 125.77 | + | 429  | 0  | 429  | Rsa1.0_00154.1 | 189461 | 49401  | 49830  | 100.0 | 100.0 | 100.0 |
| R9 | RGC560c    | 126.31 | - | 472  | 0  | 472  | Rsa1.0_00154.1 | 189461 | 106274 | 106746 | 100.0 | 100.0 | 100.0 |
| R9 | RS2CL4118s | 127.34 | + | 746  | 0  | 746  | Rsa1.0_00662.1 | 192183 | 1271   | 2379   | 97.2  | 100.0 | 148.5 |

|    |            |        |   |      |   |      |                |        |        |        |       |       |       |
|----|------------|--------|---|------|---|------|----------------|--------|--------|--------|-------|-------|-------|
| R9 | RSS1035    | 127.52 | + | 574  | 0 | 574  | Rsa1.0_00414.1 | 202190 | 45335  | 46091  | 100.0 | 100.0 | 131.7 |
| R9 | RS2CL5486s | 127.93 | + | 585  | 0 | 585  | Rsa1.0_00154.1 | 189461 | 181967 | 182547 | 95.6  | 100.0 | 99.2  |
| R9 | RGC1999c   | 128.49 | - | 400  | 0 | 400  | Rsa1.0_00154.1 | 189461 | 151787 | 152187 | 100.0 | 100.0 | 100.0 |
| R9 | RSS3287    | 128.67 | + | 778  | 0 | 778  | Rsa1.0_01376.1 | 47004  | 37625  | 39039  | 98.6  | 100.0 | 181.8 |
| R9 | RGC5007c   | 128.91 | - | 453  | 0 | 453  | Rsa1.0_00351.1 | 413096 | 245705 | 246158 | 100.0 | 100.0 | 100.0 |
| R9 | RS2CL3231s | 129.25 | + | 691  | 4 | 691  | Rsa1.0_01236.1 | 50156  | 11646  | 12709  | 97.3  | 99.4  | 154.7 |
| R9 | RS2CL5203s | 129.51 | + | 1264 | 2 | 1230 | Rsa1.0_01199.1 | 163576 | 126966 | 128986 | 53.6  | 97.2  | 164.5 |
| R9 | RGC2070c   | 130    | + | 425  | 0 | 425  | Rsa1.0_00351.1 | 413096 | 385602 | 386027 | 100.0 | 100.0 | 100.0 |
| R9 | RGC23150c  | 130    | - | 499  | 0 | 499  | Rsa1.0_00002.1 | 601661 | 43509  | 44008  | 95.8  | 100.0 | 100.0 |
| R9 | RGB2543c   | 130    | + | 476  | 0 | 476  | Rsa1.0_00662.1 | 192183 | 33434  | 33910  | 100.0 | 100.0 | 100.0 |
| R9 | RGC5810c   | 130    | + | 445  | 0 | 445  | Rsa1.0_01236.1 | 50156  | 1173   | 1618   | 100.0 | 100.0 | 100.0 |
| R9 | RGC6156c   | 130    | + | 494  | 0 | 494  | Rsa1.0_01799.1 | 39127  | 8241   | 8735   | 89.7  | 100.0 | 100.0 |
| R9 | RGB8501c   | 130    | - | 548  | 0 | 548  | Rsa1.0_01639.1 | 41850  | 4814   | 5362   | 100.0 | 100.0 | 100.0 |
| R9 | RSS1133    | 130.12 | + | 592  | 0 | 592  | Rsa1.0_00154.1 | 189461 | 172747 | 173818 | 99.8  | 100.0 | 180.9 |
| R9 | RS2CL5024s | 130.79 | - | 899  | 5 | 899  | Rsa1.0_00002.1 | 601661 | 419967 | 421720 | 96.4  | 99.4  | 196.1 |
| R9 | RSS0093    | 130.8  | - | 278  | 0 | 278  | Rsa1.0_01799.1 | 39127  | 4082   | 4360   | 100.0 | 100.0 | 100.0 |
| R9 | RS2CL3112s | 131.1  | + | 899  | 0 | 898  | Rsa1.0_00002.1 | 601661 | 453710 | 454610 | 99.7  | 99.9  | 100.2 |
| R9 | RSS1329    | 131.1  | + | 852  | 2 | 198  | Rsa1.0_00475.1 | 81678  | 39192  | 39389  | 23.0  | 23.0  | 100.5 |
| R9 | RS2CL4174s | 131.25 | - | 729  | 0 | 729  | Rsa1.0_00002.1 | 601661 | 454953 | 456192 | 96.8  | 100.0 | 170.0 |
| R9 | Gpi        | 131.48 |   |      |   |      |                |        |        |        |       |       |       |
| R9 | RS2CL5963s | 131.63 | - | 1382 | 2 | 1381 | Rsa1.0_00002.1 | 601661 | 436514 | 437893 | 45.2  | 99.8  | 100.0 |
| R9 | RSS3041    | 131.77 | + | 862  | 0 | 862  | Rsa1.0_00662.1 | 192183 | 181768 | 182802 | 100.0 | 100.0 | 120.0 |
| R9 | RS2CL7452s | 131.96 | + | 662  | 7 | 661  | Rsa1.0_00053.1 | 263459 | 211034 | 211688 | 97.4  | 98.8  | 100.0 |
| R9 | RSS0603    | 132.16 | + | 769  | 0 | 769  | Rsa1.0_00351.1 | 413096 | 1787   | 3249   | 100.0 | 100.0 | 190.1 |
| R9 | RS2CL1949s | 132.17 | + | 1368 | 0 | 1366 | Rsa1.0_03185.1 | 24739  | 7505   | 9914   | 98.0  | 99.9  | 176.4 |
| R9 | RGC2758c   | 132.35 | + | 405  | 0 | 405  | Rsa1.0_00002.1 | 601661 | 480951 | 481356 | 100.0 | 100.0 | 100.0 |
| R9 | RGC5530c   | 132.35 | + | 505  | 0 | 505  | Rsa1.0_01242.1 | 50066  | 22601  | 23106  | 100.0 | 100.0 | 100.0 |
| R9 | RGC8742c   | 132.56 | + | 472  | 0 | 472  | Rsa1.0_00002.1 | 601661 | 551663 | 552135 | 100.0 | 100.0 | 100.0 |
| R9 | CA35a      | 132.74 |   |      |   |      |                |        |        |        |       |       |       |
| R9 | RS2CL5908s | 133.03 | + | 877  | 1 | 877  | Rsa1.0_00053.1 | 263459 | 144852 | 145830 | 99.8  | 99.9  | 111.6 |
| R9 | RGC10531c  | 133.65 | - | 586  | 0 | 586  | Rsa1.0_00002.1 | 601661 | 506667 | 507253 | 100.0 | 100.0 | 100.0 |
| R9 | RGC6519c   | 134.07 | + | 402  | 0 | 402  | Rsa1.0_00071.1 | 345714 | 36175  | 36577  | 100.0 | 100.0 | 100.0 |
| R9 | RGB13054c  | 134.36 | - | 465  | 0 | 465  | Rsa1.0_04057.1 | 19333  | 11930  | 12395  | 100.0 | 100.0 | 100.0 |
| R9 | RS2CL1116s | 134.82 | + | 1035 | 7 | 1033 | Rsa1.0_00002.1 | 601661 | 264134 | 265939 | 94.9  | 99.1  | 175.9 |
| R9 | RS2CL3917s | 135.53 | + | 1176 | 1 | 1176 | Rsa1.0_00002.1 | 601661 | 573673 | 575147 | 98.3  | 99.9  | 125.5 |
| R9 | RSS0155    | 136.73 | + | 869  | 0 | 869  | Rsa1.0_00039.1 | 296927 | 67740  | 68681  | 94.8  | 100.0 | 108.3 |

|    |            |        |   |      |     |      |                |        |        |        |      |       |       |
|----|------------|--------|---|------|-----|------|----------------|--------|--------|--------|------|-------|-------|
| R9 | RS2CL5880s | 137.21 | + | 1144 | 2   | 1139 | Rsa1.0_00002.1 | 601661 | 243969 | 245223 | 97.1 | 99.4  | 110.3 |
| R9 | RSS1128    | 138.23 | + | 748  | 1   | 748  | Rsa1.0_00071.1 | 345714 | 334641 | 335384 | 95.7 | 99.9  | 99.5  |
| R9 | RS2CL2842s | 138.53 | + | 744  | 0   | 744  | Rsa1.0_00176.1 | 240984 | 188320 | 189155 | 97.6 | 100.0 | 112.2 |
| R9 | RSS2113    | 139.63 | + | 891  | 268 | 891  | Rsa1.0_01073.1 | 55030  | 11306  | 11917  | 64.8 | 69.9  | 98.1  |
| R9 | RSS1425    | 141.43 | - | 843  | 29  | 842  | Rsa1.0_00039.1 | 296927 | 48748  | 50478  | 95.5 | 96.4  | 212.8 |
| R9 | Rs2CL1695s | 143.22 | + | 717  | 2   | 717  | Rsa1.0_01236.1 | 50156  | 1258   | 2273   | 96.8 | 99.7  | 142.0 |
| R9 | RGC15178c  | 146.77 | - | 479  | 0   | 479  | Rsa1.0_01119.1 | 53459  | 8047   | 8526   | 91.0 | 100.0 | 100.0 |

Table S17 Number of SNPs between different lines of radish

|                | Taibysobutori | Yumehomare   | Sakurajima   | AZ26H        | N1-3         | Nishimachiriso | Aokubi       | Sayatori     |
|----------------|---------------|--------------|--------------|--------------|--------------|----------------|--------------|--------------|
| Taibysobutori  | –             | 2,387 (3.49) | 3,289 (3.68) | 3,028 (3.64) | 2,494 (3.36) | 2,659 (3.52)   | 2,066 (2.85) | 5,569 (6.04) |
| Yumehomare     |               | –            | 3,441 (3.76) | 3,034 (3.64) | 2,730 (3.50) | 2,842 (3.64)   | 2,681 (3.31) | 5,681 (5.97) |
| Sakurajima     |               |              | –            | 3,386 (3.59) | 3,542 (3.78) | 3,459 (3.65)   | 3,568 (3.55) | 5,457 (5.65) |
| AZ26H          |               |              |              | –            | 3,129 (3.66) | 3,003 (3.44)   | 3,144 (3.44) | 5,321 (5.78) |
| N1-3           |               |              |              |              | –            | 2,763 (3.43)   | 2,882 (3.41) | 5,642 (5.98) |
| Nishimachiriso |               |              |              |              |              | –              | 2,938 (3.39) | 5,436 (5.81) |
| Aokubi         |               |              |              |              |              |                | –            | 7,873 (6.95) |

Values in parentheses represent the number of SNPs per a common amplicon.

Table S18 Number of common amplicons containing SNPs between different lines of Radish

|                     | Taibysobutori | Yumehomare | Sakurajima | AZ26H | N1-3  | Nishimachiriso | Aokubi | Sayatori |
|---------------------|---------------|------------|------------|-------|-------|----------------|--------|----------|
| Number of fragments | 1,484         | 1,506      | 1,487      | 1,494 | 1,496 | 1,498          | 2,880  | 1,722    |
| Taibysobutori       | –             | 684        | 894        | 832   | 743   | 755            | 724    | 922      |
| Yumehomare          |               | –          | 915        | 834   | 780   | 780            | 809    | 952      |
| Sakurajima          |               |            | –          | 943   | 938   | 947            | 1,004  | 965      |
| AZ26H               |               |            |            | –     | 854   | 872            | 913    | 921      |
| N1-3                |               |            |            |       | –     | 806            | 845    | 943      |
| Nishimachiriso      |               |            |            |       |       | –              | 866    | 936      |
| Aokubi              |               |            |            |       |       |                | –      | 1,133    |
